# Supplementary material
Source: PubMed Central journal article supplement (PMC2749958)
Supplement: NIHMS142212-supplement-1_si_001.pdf [file NIHMS142212-supplement-1_si_001.pdf]

# **Procaspase-3 Activation as an Anti-Cancer Strategy: Structure-Activity Relationship of PAC-1, and its Cellular Co-Localization with Procaspase-3**

Quinn P. Peterson,<sup>1</sup> Danny C. Hsu,<sup>2</sup> David R. Goode,<sup>2</sup> Chris J. Novotny,<sup>1</sup>  
Ryan K. Totten,<sup>2</sup> and Paul J. Hergenrother<sup>1,2\*</sup>

## **Supporting Information**

*Department of Chemistry<sup>2</sup>  
Department of Biochemistry<sup>1</sup>  
Roger Adams Laboratory  
University of Illinois  
Urbana, IL 61801*

\*To whom correspondence should be addressed: hergenro@uiuc.edu

## Table of Contents

### Biological Evaluation

|                                                                                 |        |
|---------------------------------------------------------------------------------|--------|
| <b>Material and Methods.</b> .....                                              | S3-S20 |
| <i>Materials.</i> .....                                                         | S3     |
| <i>Cell Culture.</i> .....                                                      | S3     |
| <i>Cell Death Assay.</i> .....                                                  | S3     |
| <i>Recombinant expression and purification of procaspase-3/caspase-3.</i> ..... | S4     |
| <i>Caspase-3 Activity Assays.</i> .....                                         | S4     |
| <i>EGTA Fluorescence Titration Assay.</i> .....                                 | S5     |
| <i>Immunofluorescent Staining</i> .....                                         | S5     |
| <i>Live Cell Imaging.</i> .....                                                 | S6     |
| <i>Image Analysis.</i> .....                                                    | S6     |
| <i>Induction of Apoptosis by PAC-1 derivatives</i> .....                        | S6     |

### Supporting Figures

|                                                                                       |     |
|---------------------------------------------------------------------------------------|-----|
| <b>Figure S1.</b> Cytotoxicity of <b>PAC-1</b> and derivatives .....                  | S7  |
| <b>Figure S2.</b> Relief of zinc mediated caspase-3 inhibition .....                  | S9  |
| <b>Figure S3.</b> Formation curves for zinc binding determination .....               | S11 |
| <b>Figure S4.</b> Inhibition by class IV compounds .....                              | S15 |
| <b>Figure S5.</b> Biochemical assessment of <b>2h</b> .....                           | S16 |
| <b>Figure S6.</b> Cellular localization of <b>2h</b> .....                            | S17 |
| <b>Figure S7.</b> Colocalization of <b>2h</b> and caspase-3/-7 .....                  | S18 |
| <b>Figure S8.</b> Assessment of apoptotic induction by <b>PAC-1</b> derivatives ..... | S19 |

### Chemical Information

|                                                               |         |
|---------------------------------------------------------------|---------|
| <b>Materials and Methods.</b> .....                           | S21-S54 |
| <b>Scheme S1.</b> Syntheses of <b>PAC-1</b> derivatives ..... | S22     |
| <b>Scheme S2.</b> Synthesis of <b>4c</b> .....                | S39     |
| <b>Scheme S3.</b> Syntheses of <b>4a</b> and <b>4b</b> .....  | S41     |
| <b>Scheme S4.</b> Syntheses of <b>4f</b> and <b>4g</b> .....  | S44     |
| <b>Scheme S5.</b> Syntheses of <b>4d</b> and <b>4e</b> .....  | S47     |
| <b>Scheme S6.</b> Synthesis of <b>2h</b> .....                | S51     |

|                         |     |
|-------------------------|-----|
| <b>References</b> ..... | S55 |
|-------------------------|-----|

|                                    |     |
|------------------------------------|-----|
| <b>Spectral/Purity Data.</b> ..... | S56 |
|------------------------------------|-----|

## Materials and Methods

*Materials*—All reagents were obtained from Fisher unless otherwise indicated. All buffers were made with MilliQ purified water. **PAC-1** and derivatives were synthesized as previously described and as described herein. Ac-DEVD-pNA was synthesized as described. Luria broth (LB) was obtained from EMD. Etoposide was obtained from Sigma. Caspase Activity Buffer contains 50 mM Hepes (pH 7.4), 300 mM NaCl and is Chelex® treated. Ni NTA binding buffer contains 50 mM Tris (pH 8.0), 300 mM NaCl, and 10 mM imidazole. Ni NTA Wash Buffer contains 50 mM Tris (pH 8.0), 300 mM NaCl, and 20 mM imidazole. Ni NTA Elution Buffer contains 50 mM Tris (pH 8.0), 300 mM NaCl, and 500 mM imidazole. Annexin V Binding Buffer contains 10 mM HEPES pH 7.4, 140 mM NaCl, 2.5 mM CaCl<sub>2</sub>, 0.1% BSA. The C-terminal 6xHis-tagged procaspase-3 proteins were expressed as described below.

*Cell Culture*—U937 human lymphoma cells and SK-Mel-5 human melanoma cells were obtained from ATCC. Cells were cultured in RPMI 1640 growth media supplemented with 10% FBS and 1% pen-strep. Cells were incubated at 37 °C and 5 % CO<sub>2</sub>. Subculture of SK-Mel-5 cells was achieved through trypsinization of the cell monolayer using 0.05% Trysin-EDTA (Gibco) dilution and further culture in RPMI 1640 growth media supplemented with FBS and pen-strep as above.

*Cell Death Assay*—U937 human lymphoma cells were plated into the wells of 96 well plate at a density of 5000 cells per well in 200 µL of RPMI 1640 growth media with 10% FBS and 1% pen-strep. To each well was added 2 µL of 100X compound stock solutions in DMSO at varying concentrations so that the cells were treated with concentrations between 0 µM and 100 µM compound. Each concentration was tested in quintuplicate. In each plate 5 wells received 10 µM etoposide as a positive control and 5 wells received 2 µL of DMSO as a negative control. The plates were then incubated at 37 °C and 5% CO<sub>2</sub> for 72 hours. After the 72 hour incubation period, the plates were analyzed using a Sulforhodamine B assay as previously described.<sup>1</sup> Specifically, to each well of the plate was added 50 µL of an 80% (w/v) solution of TCA in H<sub>2</sub>O and the plates were allowed to rest at 4 °C overnight. The plates were then washed gently with a steam of H<sub>2</sub>O five times to remove the excess TCA and precipitated serum proteins. The plates were then allowed to air dry after which 100 µL of a 0.057% (w/v) Sulforhodamine B in a 1% (v/v) acetic acid solution was added to each well and allowed to stain for 30 minutes at room temperature. After staining, the wells were gently washed 5 times with 100 µL of 1% (v/v) acetic acid to remove the unbound dye. The plates were then allowed to air dry. 200 µL of 10 mM Tris base (pH 10.5) was then added to each well and the plates were

placed on an orbital shaker for five minutes. The OD was then read at 510 nm in a Molecular Dynamics plate reader and the percent cell death calculated and normalized to the positive control (100% cell death) and the negative control (0% cell death). The percent cell death was averaged for each compound concentration and plotted as a function of compound concentration. The data were fit to a logistical dose response curve using Table curve 2D and the IC<sub>50</sub> value was calculated. The experiment was repeated three times and the average of the calculated IC<sub>50</sub> values was reported. The standard error of the mean (SEM) was determined and reported for the triplicate experiments. The individual dose-response curves are shown in figure S1.

*Recombinant expression and purification of procaspase-3/caspase-3*—Procaspase-3 and caspase-3 were recombinantly expressed and purified exactly as previously described.<sup>2</sup> Briefly, procaspase-3 and caspase-3 were expressed from the pHc332 expression plasmid in the electrocompetent BL21(DE3) strain of *Escherichia coli* (Novagen). The C-terminally 6xHis-tagged protein was purified using the Ni NTA resin (Qiagen). Protein containing fractions were collected and pooled. The purified protein was then further purified to remove any contaminating zinc by applying the protein to a PD-10 column (GE Healthcare) charged with Caspase Activity Buffer that had been treated with Chelex ® resin. The resulting zinc free, protein containing fractions in Caspase Activity Buffer were pooled, the concentration determined, and the protein solution was flash-frozen in liquid nitrogen and stored at -80 °C.

*Caspase-3 Activity Assays*—Zinc-free stocks (2X) of caspase-3 (1 μM) were prepared in Caspase Activity Buffer. Compound stock solutions were made (2X) at various concentrations from 200 μM to 200nM in Caspase Activity Buffer. A stock (10X) of ZnSO<sub>4</sub> (25 μM) in Caspase Activity Buffer was prepared. To each well of 384 well plate was added 20 μL of caspase-3 (500 nM final), 20 μL compound stock, and 5 μL of ZnSO<sub>4</sub> (2.5 μM final) or buffer. Each plate contained positive control wells (0 μM zinc and no compound) and negative control wells (2.5 μM zinc and no compound). The plates were incubated at room temperature for 30 minutes. Then, to each well of the plate was added 5 μL of a 2 mM stock of Ac-DEVD-pNA substrate and the absorbance at 405 nm was immediately monitored every 1 minute for 30 minutes on a spectramax plate reader (Molecular Devices, Sunny Vale, CA). The slope of each well was used to determine the activity and was normalized to the positive and negative control wells to give a percent activity. The data for each compound concentration (4 wells) was averaged and the percent activity was plotted as a function of compound concentration. The data was analyzed using Table Curve 2D and fitted to a logistical dose-response curve. The majority of compounds achieved a maximal activity at 10 μM. The



percent activity at 10  $\mu\text{M}$  was determined for each compound and reported as an average of the three replicate experiments with the corresponding SEM. The individual dose-response curves are shown in Figure S2.

*EGTA Fluorescence Titration Assay*—This titration assay is based on a published protocol.[ref] Before titration, cuvette was filled with EDTA (10 mM) for 10 min, followed by sterile deionized water and acetone washing for removing any residue metal ions. **PAC-1** or derivative (60  $\mu\text{M}$ ) was added to a cuvette containing buffer (Hepes: 50 mM,  $\text{KNO}_3$ : 100 mM, pH 7.2) with EGTA (7.3 mM) to achieve a 10-fold dilution (final **PAC-1** concentration: 6  $\mu\text{M}$ ).  $\text{Zn}(\text{OTf})_2$  (0 - 10 mM) was added incrementally. The formation of **Zn-PAC-1** (or derivative) complex was monitored by the increase in fluorescence intensity (ex/em: 410 nm/475nm). Fluorescence intensity at 475 nm was plotted against free Zn concentration ( $[\text{Zn}]_f/\text{M}$ ) calculated using MaxChelator program [ref]. The data was analyzed using KaleidaGraph and fitted to a formation curve based on Eq S1 derived by published protocol.[ref]

$$I = (\text{Imin}K_D + \text{Imax}[\text{Zn}]_f)/(\text{K}_D + [\text{Zn}]_f) \quad \text{Eq S1}$$

where Imin and Imax were defined as the fluorescence intensity of the free probe (**PAC-1** or derivative in this case) and that of the Zn-probe complex respectively.

*Immunofluorescent Staining*—Round 18 mm no. 1 borosilicate coverglass (VWR) were coated with poly-lysine by shaking the coverglass in a poly-lysine solution (Sigma) for 1 hour and then washing with MilliQ. SK-Mel-5 human melanoma cells were grown on the poly-lysine coated coverglass in the bottom of a 12 well plate. When Cells achieved ~80% confluency, the cells were treated with either DMSO or 100  $\mu\text{M}$  **PAC-1** in DMSO (total DMSO <1%) for 1 hour. The cells were then washed two times with 1 mL of PBS and fixed in 3.7% formaldehyde in PBS for 10-15 minutes at room temperature. The cells were then washed again two times with PBS and then permeabilized with 0.1% Triton X-100 in PBS for 5 minutes. The cells were then blocked in 3% BSA in PBS for 10 minutes and incubated with a 1:500 rabbit anti-procaspase-3 antibody for 1 hour. The coverglass was then washed 5 times with PBS and incubated with a 1:1000 dilution of the secondary anti-rabbit Alexafluor 647 conjugated antibody for 20 minutes protected from light. The coverglass was again washed 5 times with PBS and once with MilliQ  $\text{H}_2\text{O}$ . The coverglass were then mounted on glass slides using Fluorosave (Calbiochem) and stored in the dark until imaging. Cells were imaged on a Leica SP2 Multiphoton Confocal microscope.

*Live Cell Imaging*—SK-Mel-5 cells were grown on the bottom of no. 1 borosilicate growth chambers (Nunc) to a confluency of ~80%. Cells were then treated with DMSO, 25  $\mu$ M FAM-DEVD-fmk in DMSO, 25  $\mu$ M **AF350-PAC-1** in DMSO, or both 25  $\mu$ M FAM-DEVD-fmk and 25  $\mu$ M **AF350-PAC-1** concurrently for 1 hour at 37 °C and 5 % CO<sub>2</sub>. Cells were then washed 5 times with RPMI 1640 growth media lacking phenol red. The cells were then allowed to further incubate at 37 °C for 2 hours before imaging. For cells stained with SYBR green for nuclear staining, a 1:100,000 dilution of SYBR green in media was added immediately prior to imaging. Cells were imaged on a Leica SP2 Multiphoton Confocal microscope.

*Image Analysis*—Images were adjusted in brightness and contrast to allow for clarity. For all images in Figure 4, the red channel was adjusted using Image J to reflect a linear intensity gradient between 10 and 28. For the green channel, the images were adjusted to a linear intensity gradient between 0 and 44. To account for the offset of the microscope optics, the red channel was manually offset by 5 pixels in the x direction and the green channel was manually offset by 6 pixels in the y direction. The images were filtered with a gaussian blur with a radius of 1 pixel to improve the signal to noise ratio. Using the Image J plugin, JACoP, the % overlap was determined using the Manders overlap coefficient.

*Induction of Apoptosis by PAC-1 derivatives*—U937 Cells (1 mL of  $1 \times 10^6$  cells/mL) were treated with 5  $\mu$ L ethanol stocks of the various compounds to achieve a final concentration of 50  $\mu$ M. The cells were incubated at 37 °C for 12 hours. The cells were centrifuged (200g for 5 min), washed with PBS (2 mL), resuspended in 500  $\mu$ L Annexin V Binding Buffer. To each sample was added 10  $\mu$ L of FITC conjugated Annexin V stain (Southern Biotech) and 10  $\mu$ L of propidium iodide (Sigma) to a final concentration of 50  $\mu$ g/mL. Cell populations were analyzed on a Benton Dickinson LSR II cell flow cytometer.

# Supporting Figures:

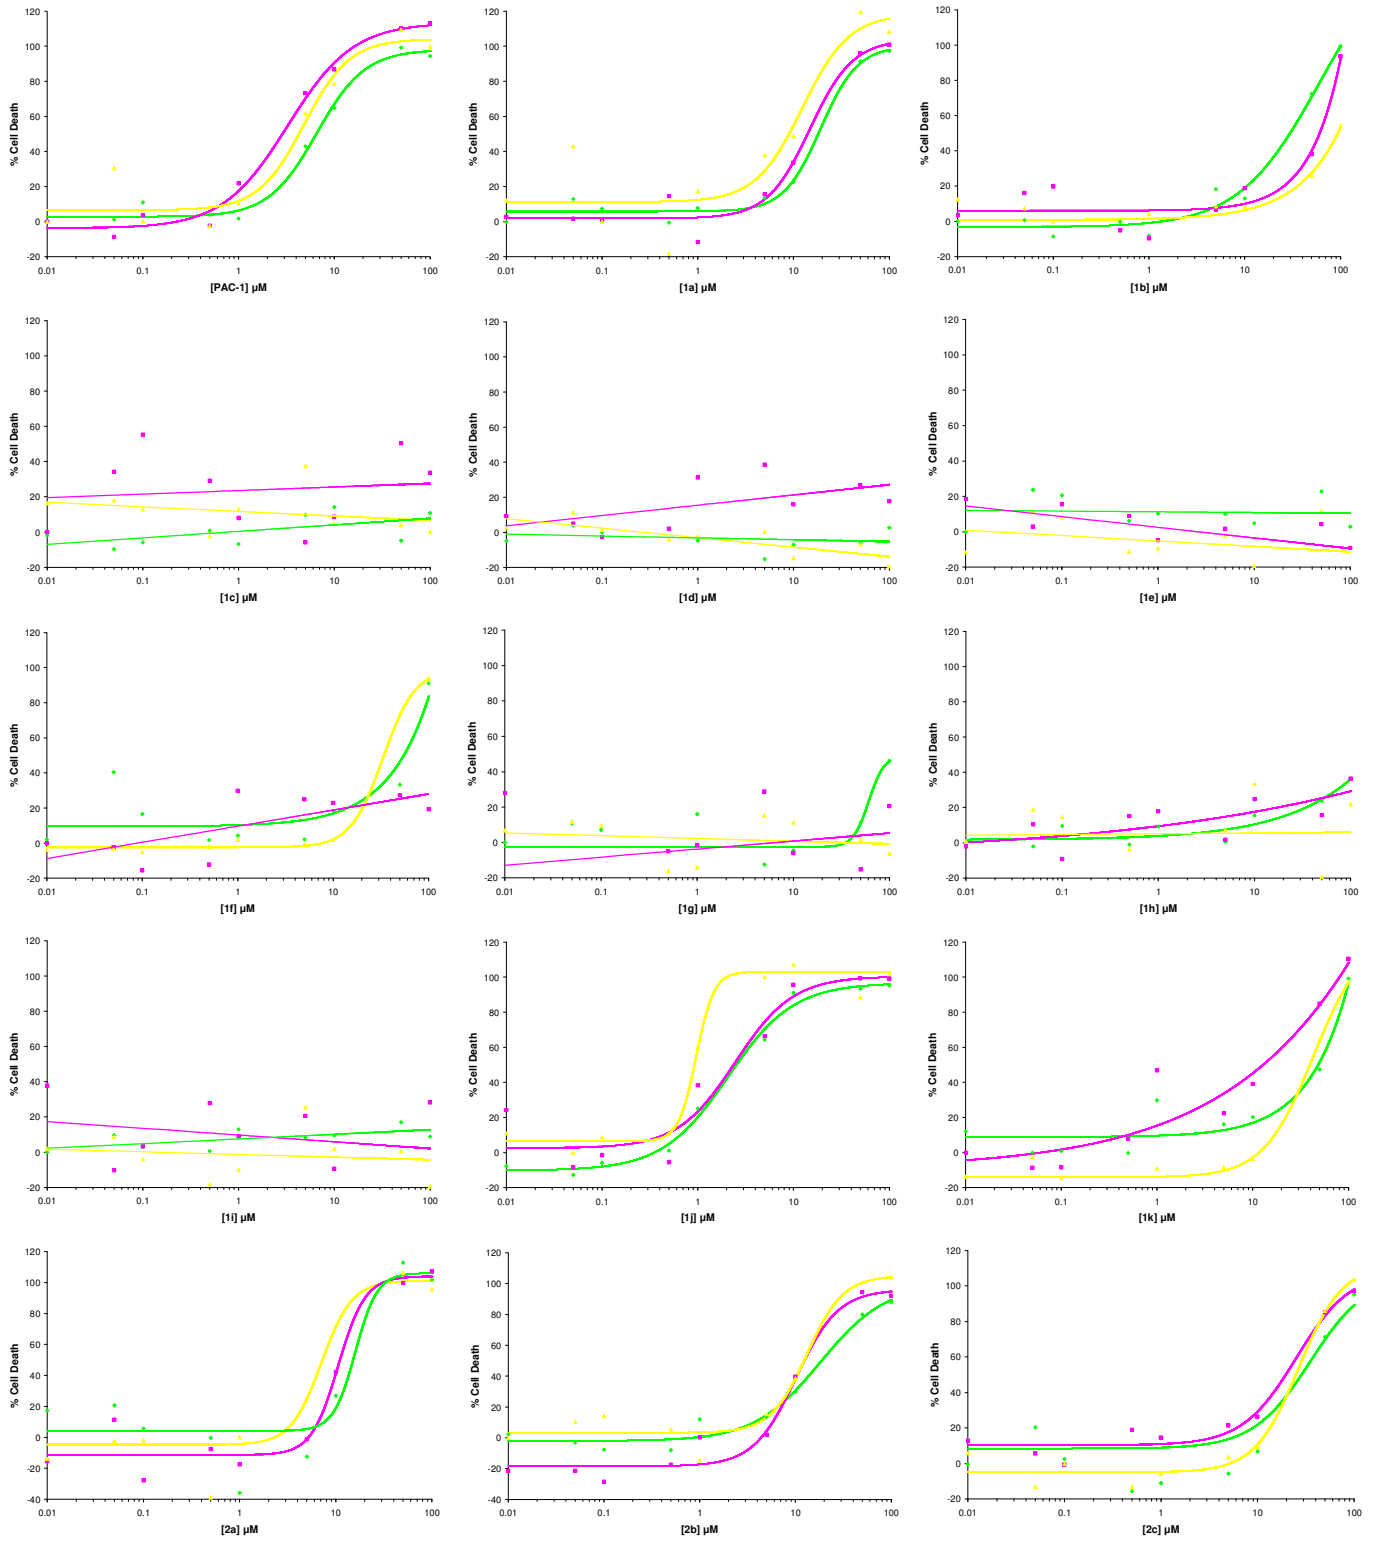

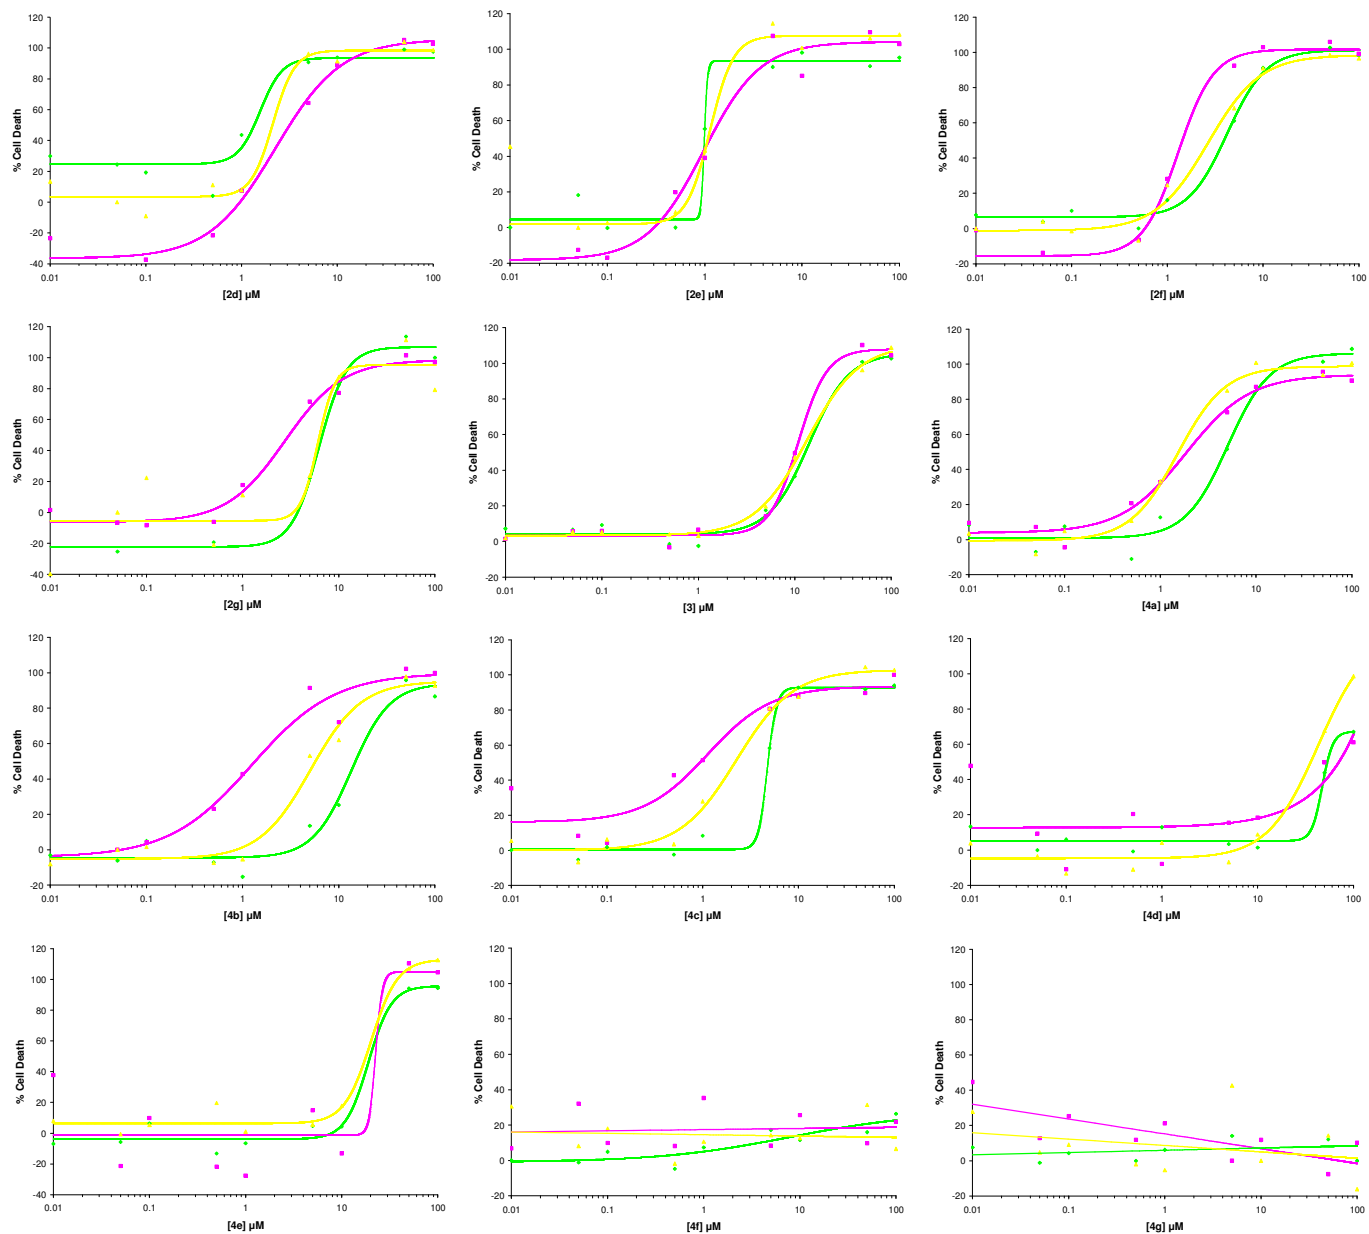

**Figure S1.** Cytotoxicity of PAC-1 and derivatives. Each graph shows the dose response curves used to generate the IC<sub>50</sub> value for each derivative. The results of these experiments are summarized in Table 1 of the manuscript.

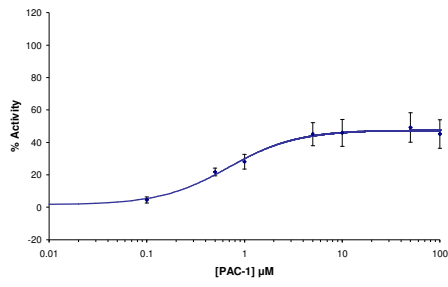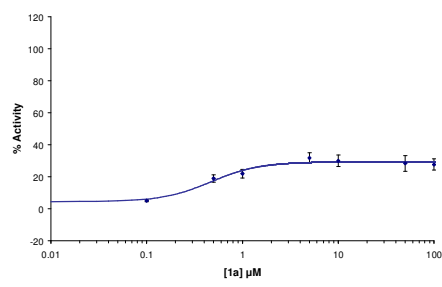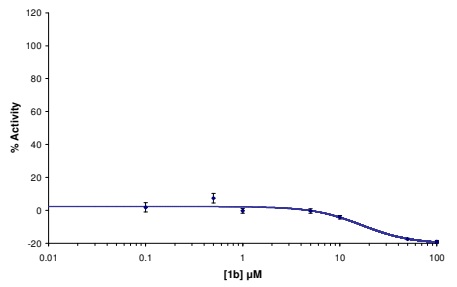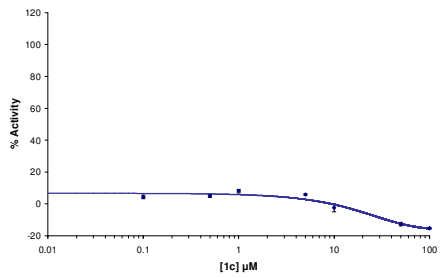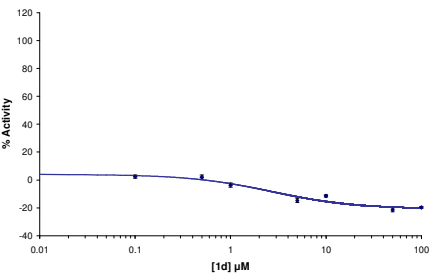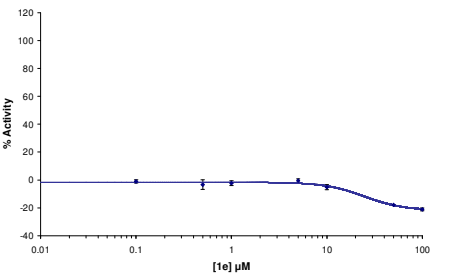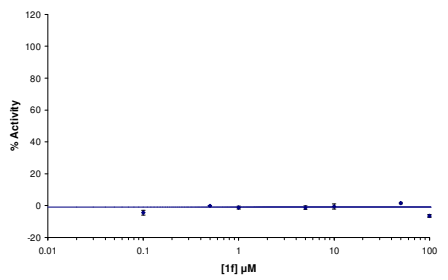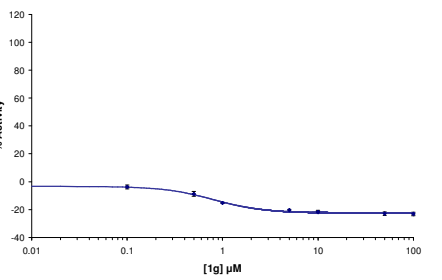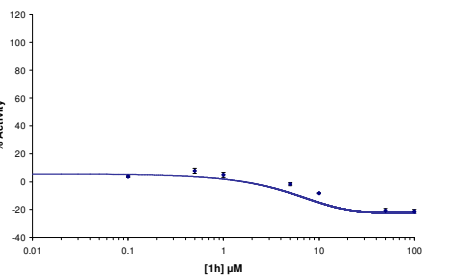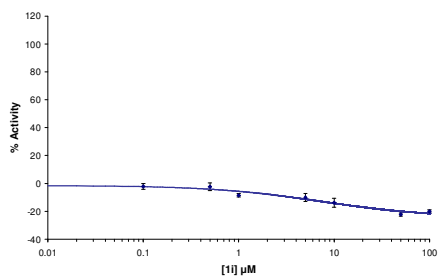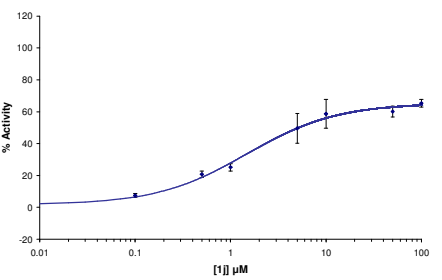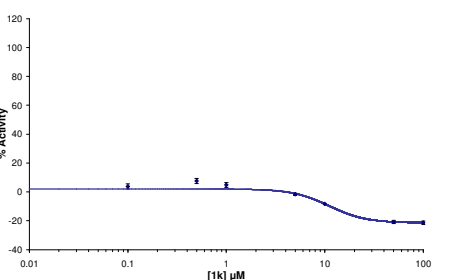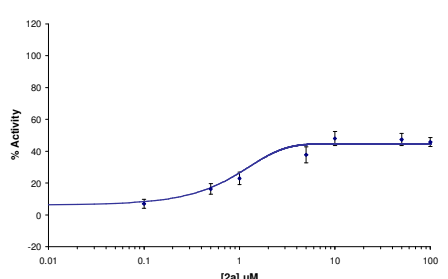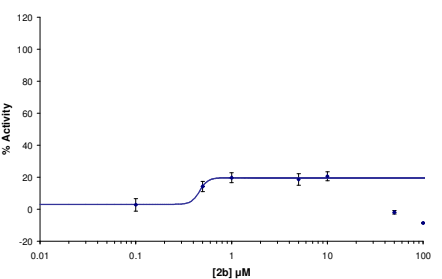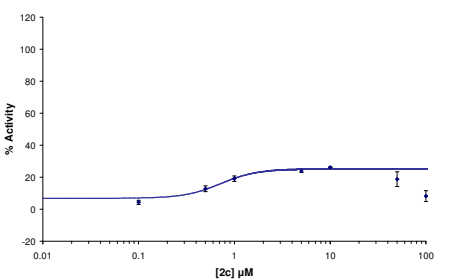

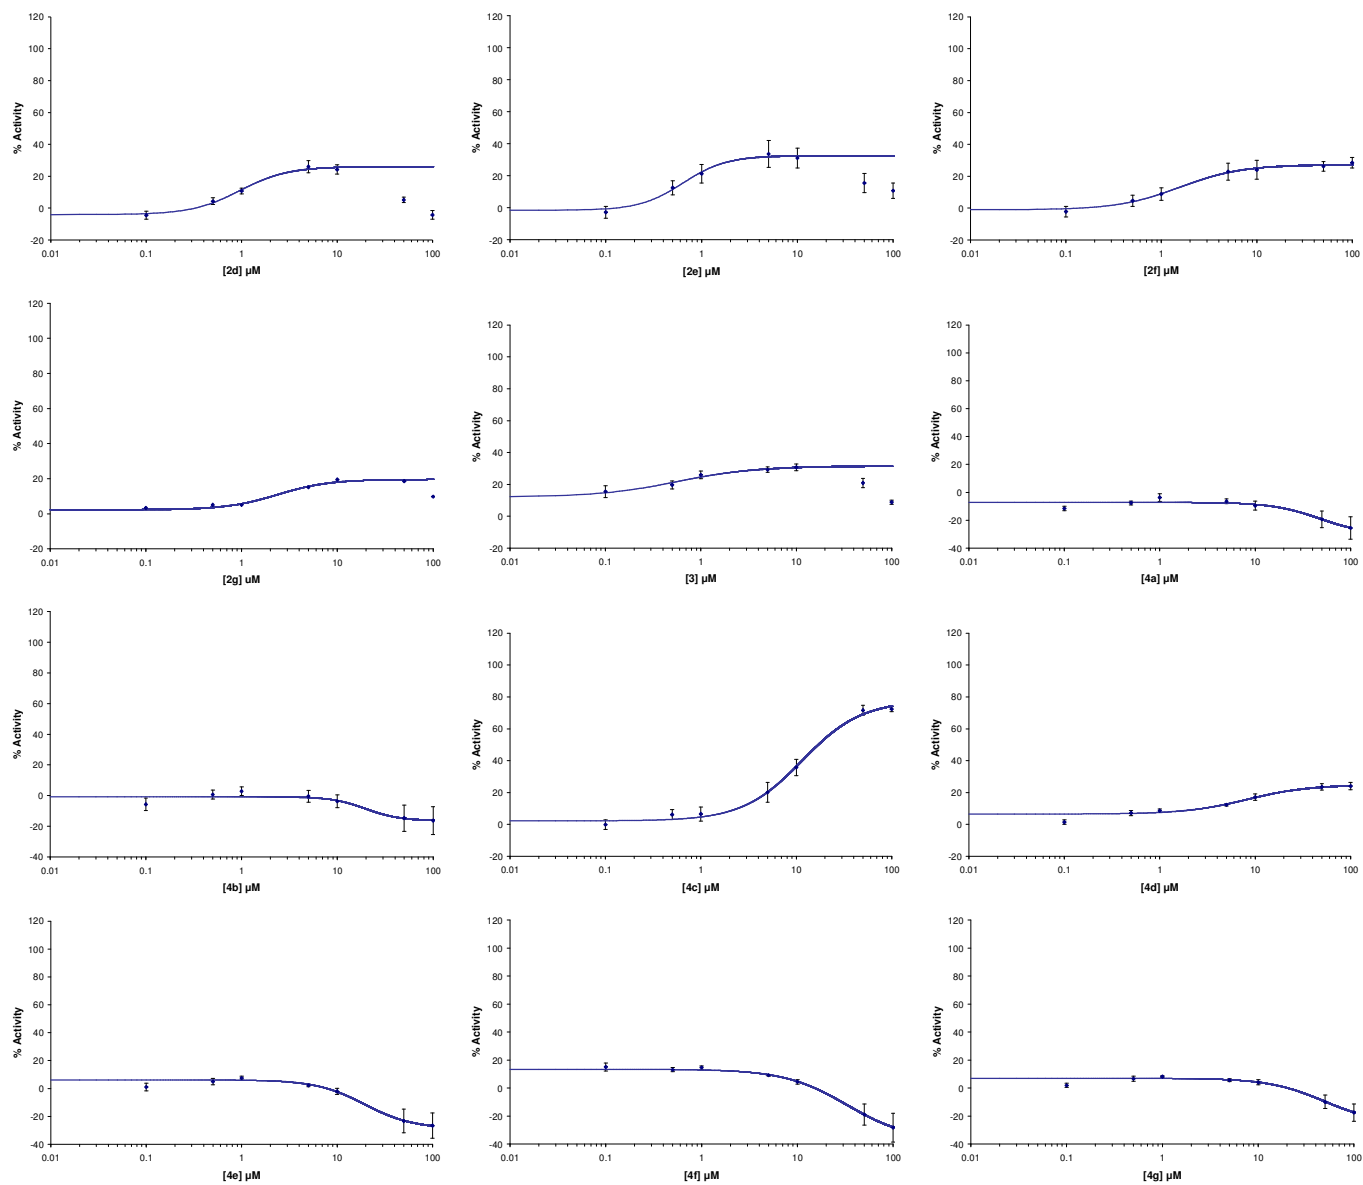

**Figure S2.** Relief of zinc mediated caspase-3 inhibition. Each graph represents three separate dose response experiments. The error bars represent the standard error of the mean for each data point. The majority of compounds show a maximal activity at 10  $\mu\text{M}$ . The % activity at 10  $\mu\text{M}$  for each compound was included in Table 1.

**Zn-PAC-1(1):  $K_d = 52 \pm 2$  nM**

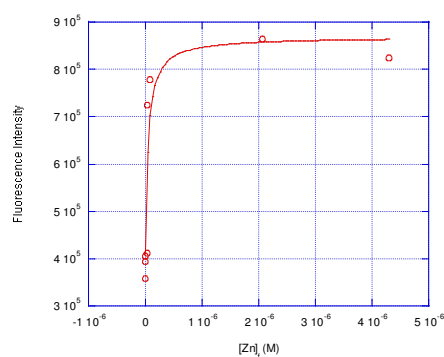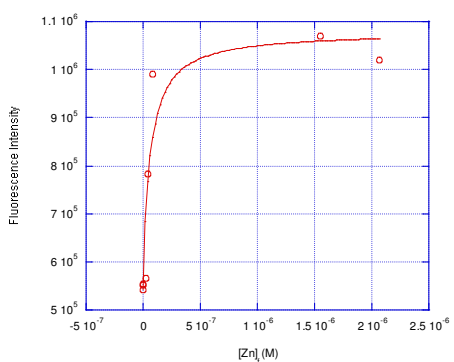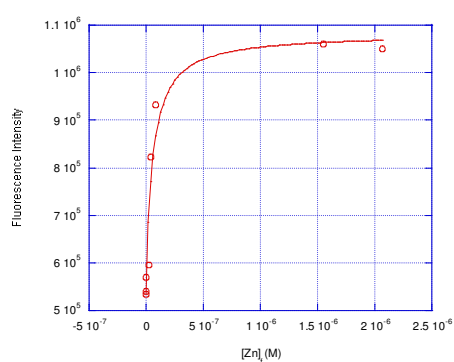

**Zn-1a:  $K_d = 77 \pm 2$  nM**

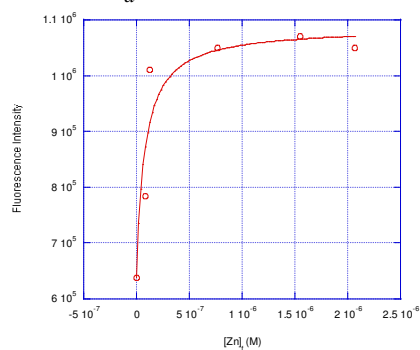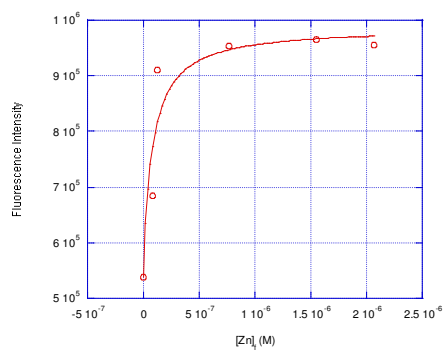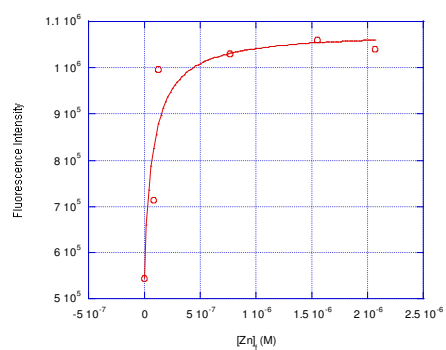

**Zn-1j:  $K_d = 43 \pm 9$  nM**

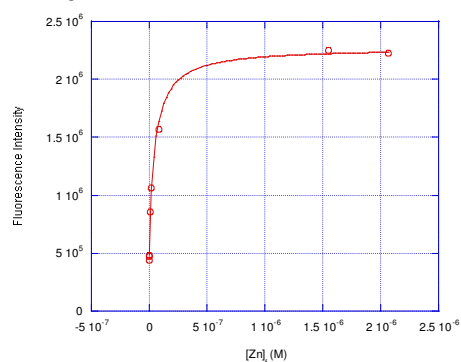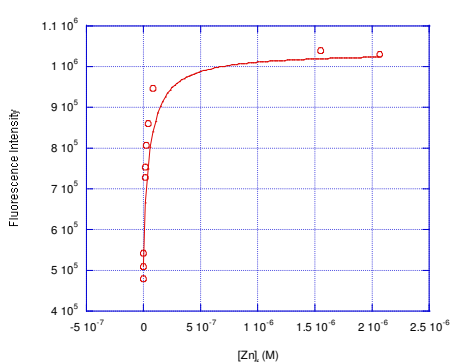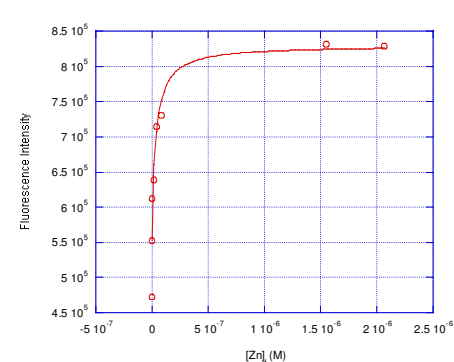

**Zn-2a:  $K_d = 68 \pm 10$  nM**

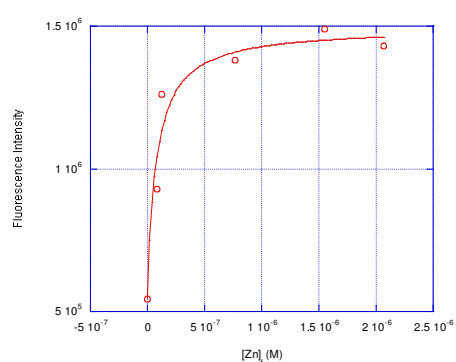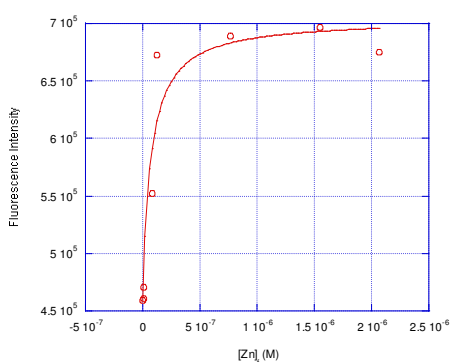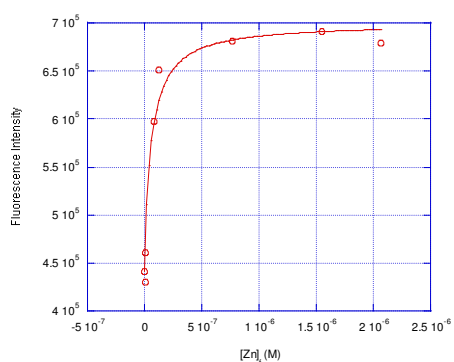

### Zn-2b: $K_d = 62 \pm 9$ nM

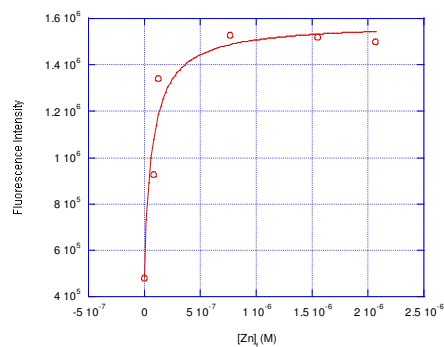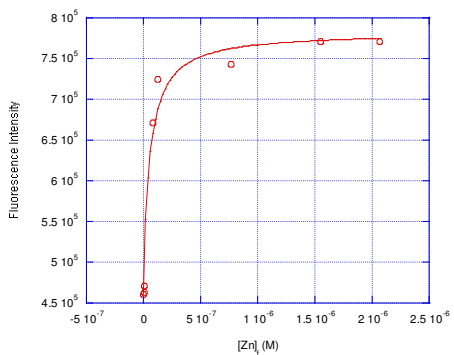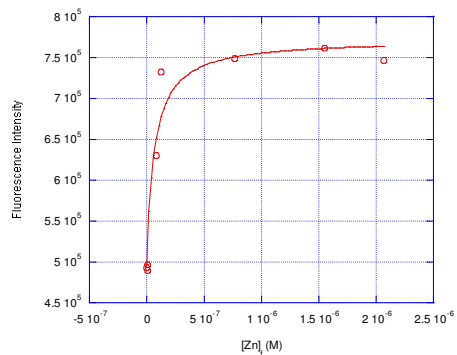

### Zn-2c: $K_d = 80 \pm 14$ nM

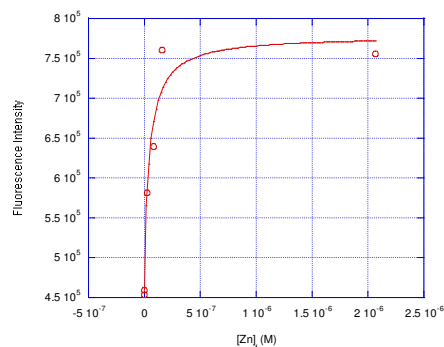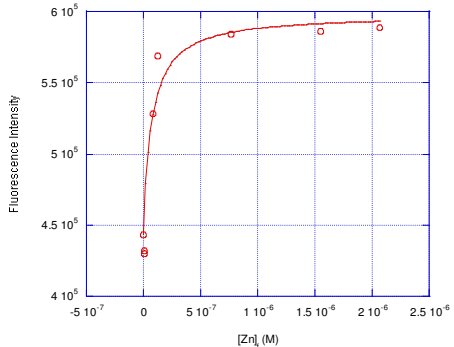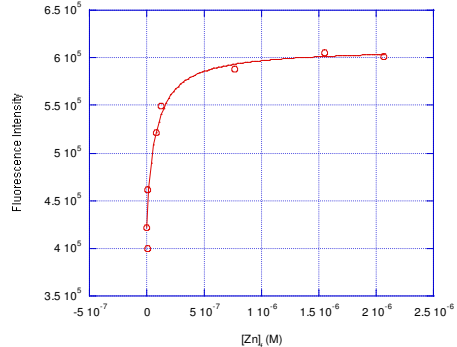

### Zn-2d: $K_d = 48 \pm 3$ nM

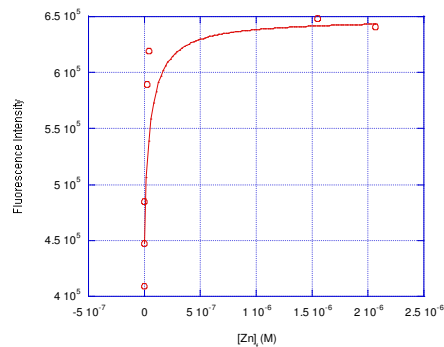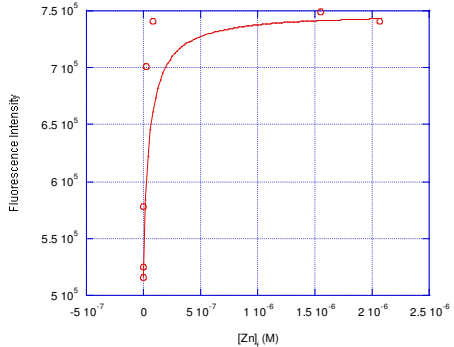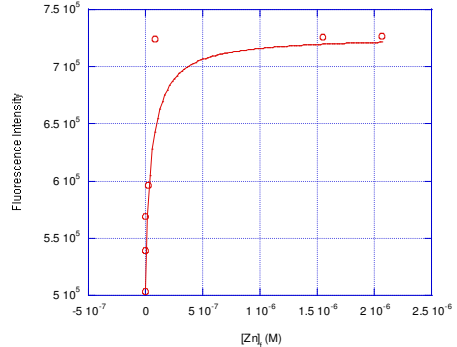

### Zn-2e: $K_d = 39 \pm 3$ nM

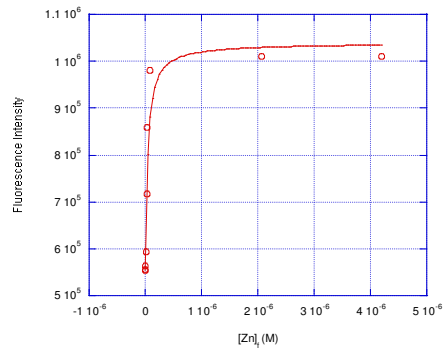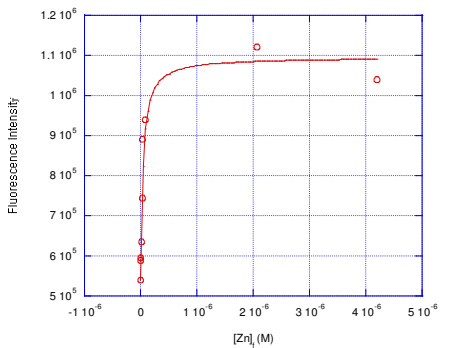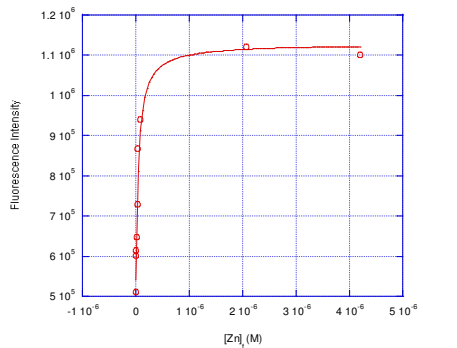



**Zn-2f:**  $K_d = 47 \pm 5$  nM

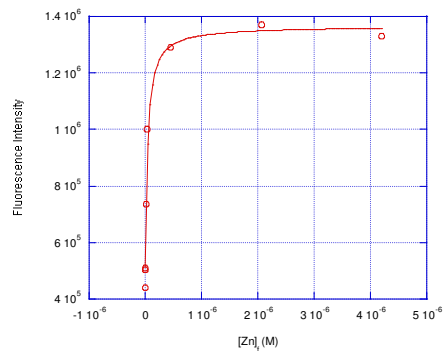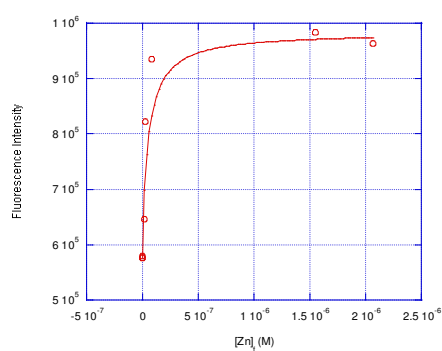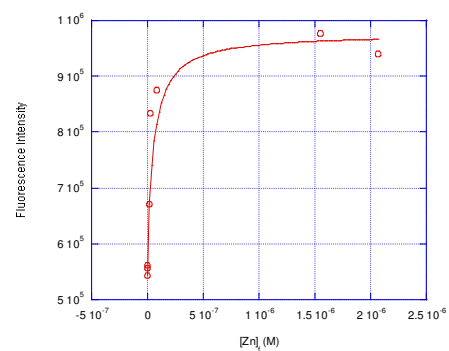

**Zn-2g:**  $K_d = 45 \pm 13$  nM

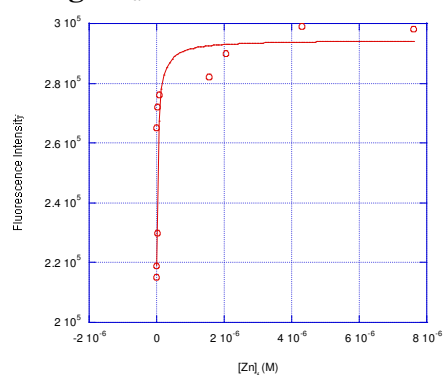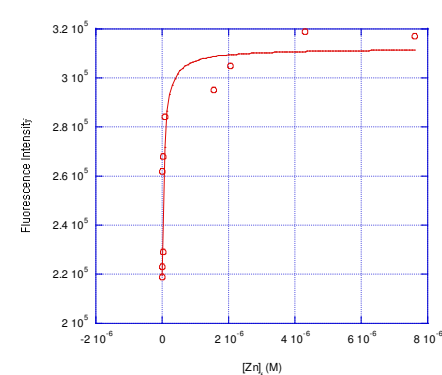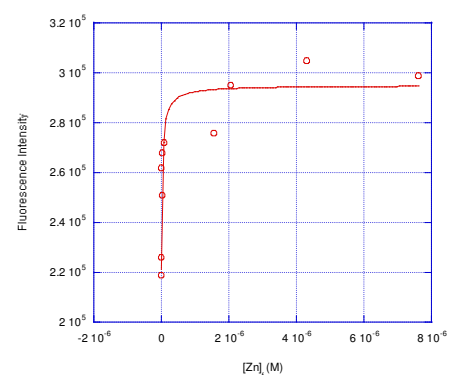

**Zn-3:**  $K_d = 65 \pm 4$  nM

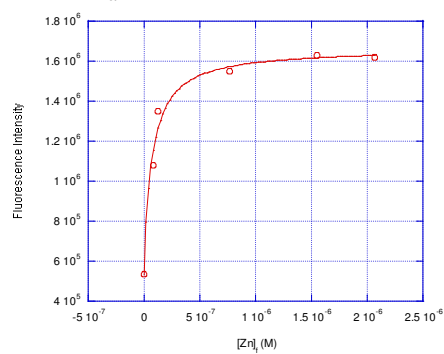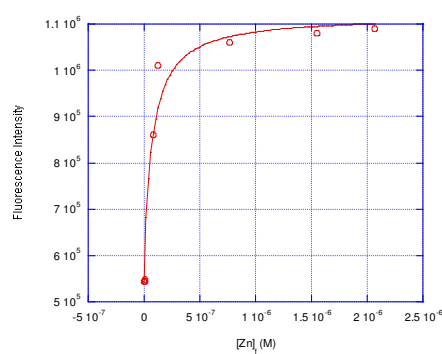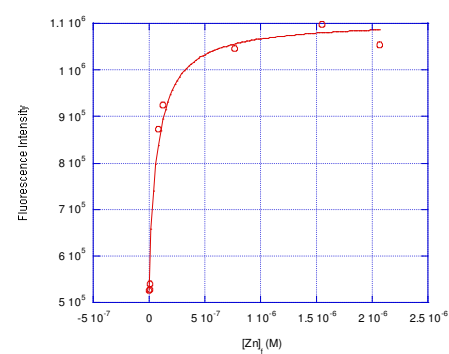

**Zn-4a:**  $K_d = 44 \pm 2$  nM

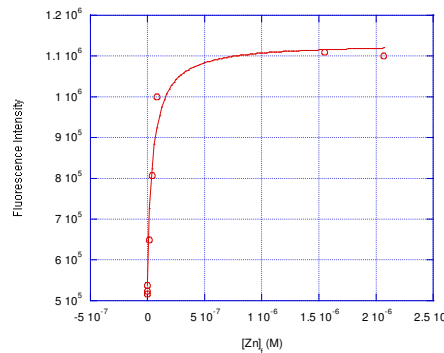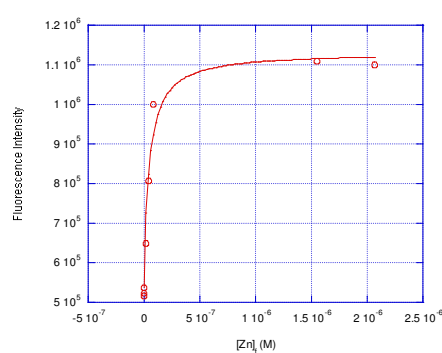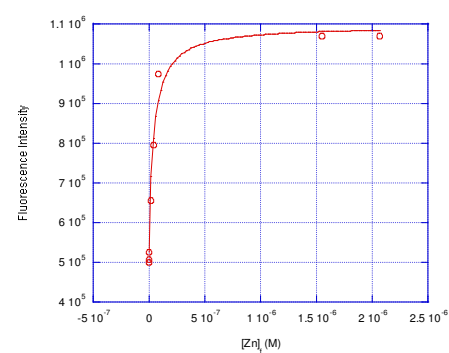

**Zn-4b:**  $K_d = 48 \pm 7$  nM

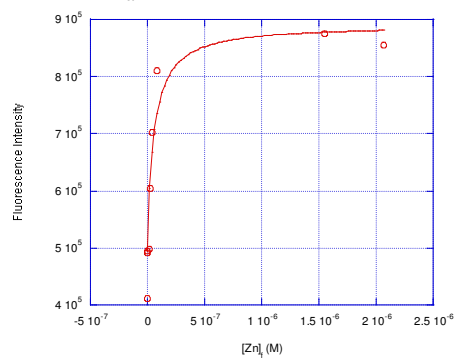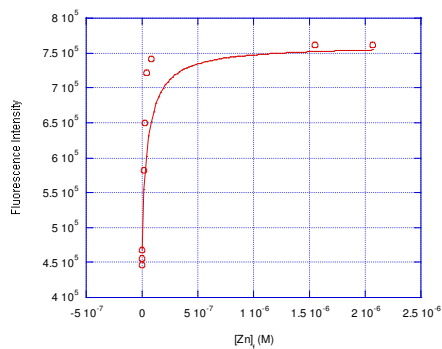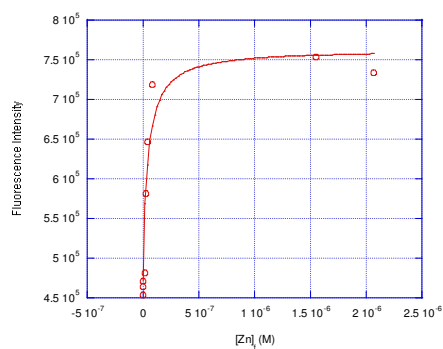

**Zn-4c:**  $K_d = 49 \pm 2$  nM

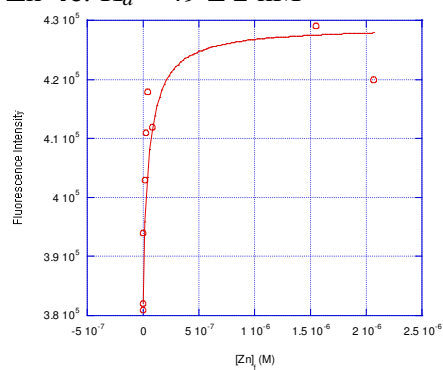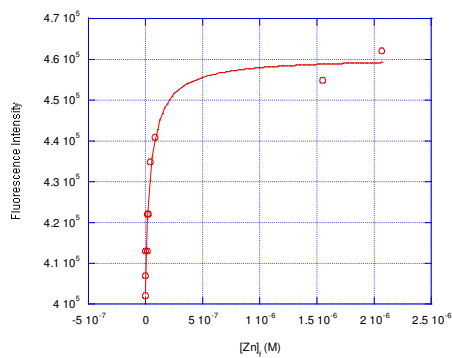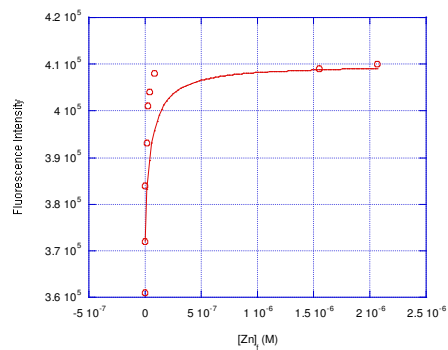

**Figure S3.** Formation curves for zinc binding determination.  $K_d$  values are summarized in Table 1.

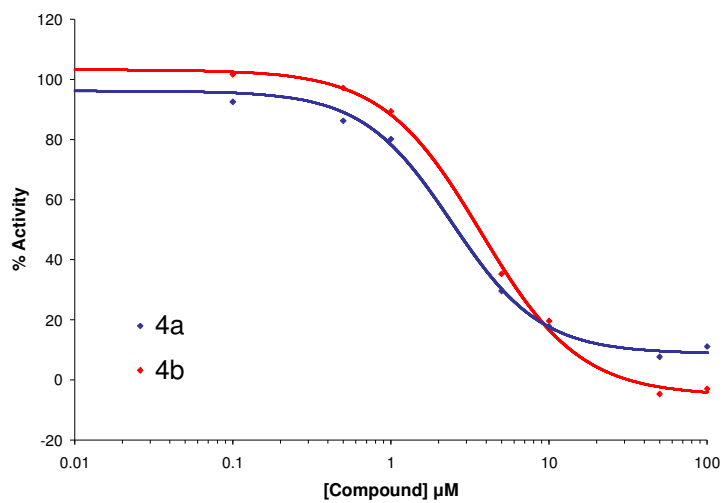

**Figure S4.** Inhibition by class IV compounds. **4a** and **4b** inhibit caspase-3 in the absence of zinc. This potent inhibition masks any activation at 10 μM.

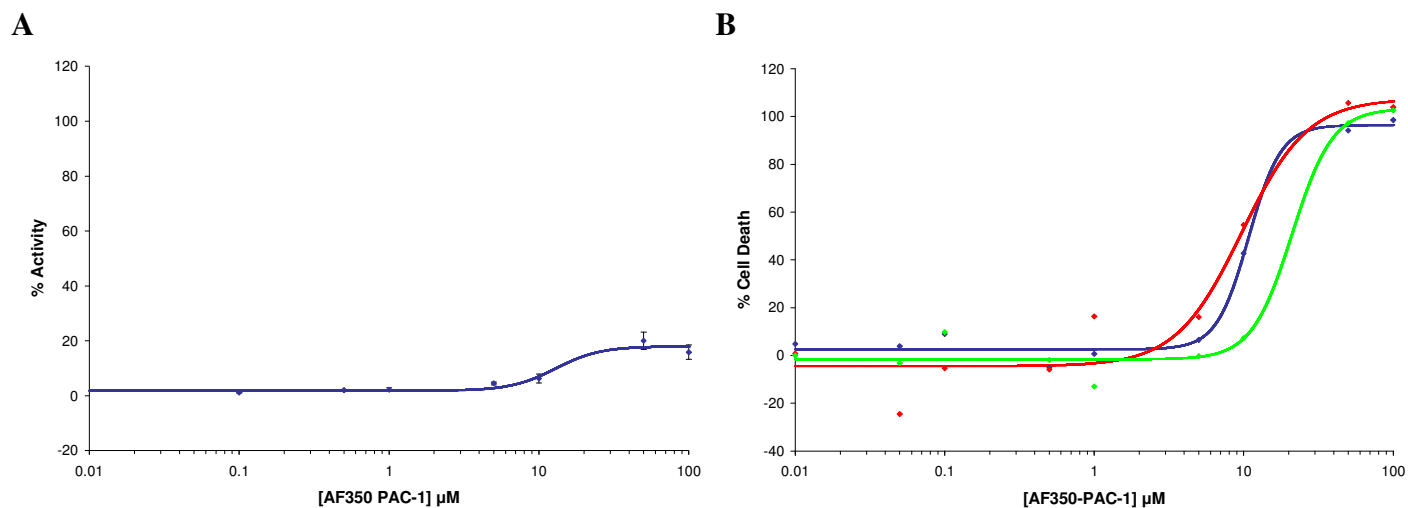

**C**  
**Zn-AL350-PAC-1(2h):  $K_d = 62 \pm 9$  nM**

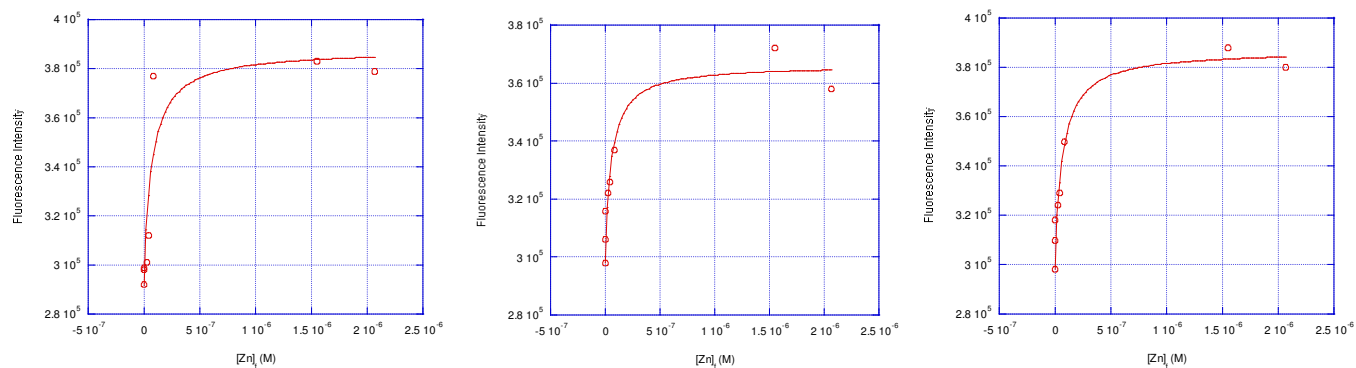

**Figure S5.** Biochemical assessment of **AF350-PAC-1(2h)**. A) **AF350-PAC-1(2h)** relieves zinc mediated inhibition of procaspase-3. B) **AF350-PAC-1(2h)** induces cell death in U937 human lymphoma cells with an  $IC_{50}$  of  $14.8 \pm 3.2$   $\mu$ M . C) **AF350-PAC-1(2h)** binds zinc with a  $K_d$  of  $61 \pm 9$  nM.

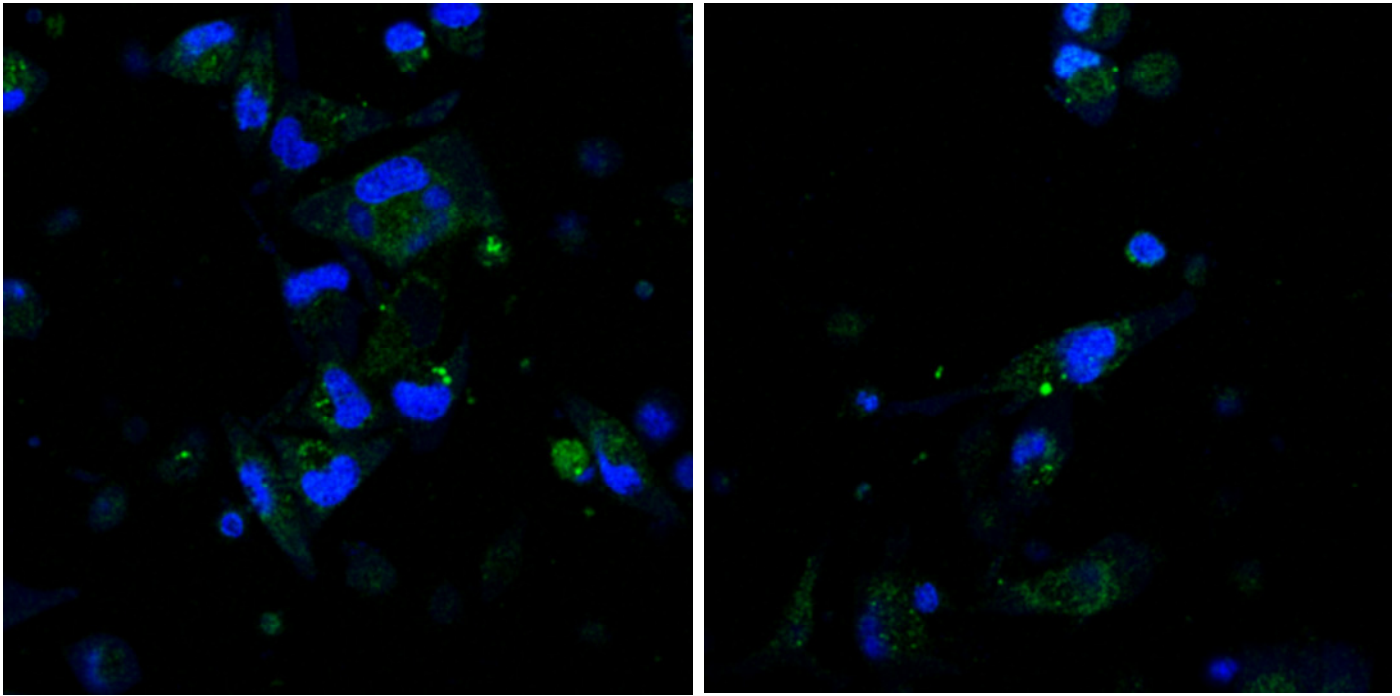

**Figure S6.** Cellular localization of **AF350-PAC-1**. Wide field images showing the localization of **AF350-PAC-1** in SK-MEL-5 cells.

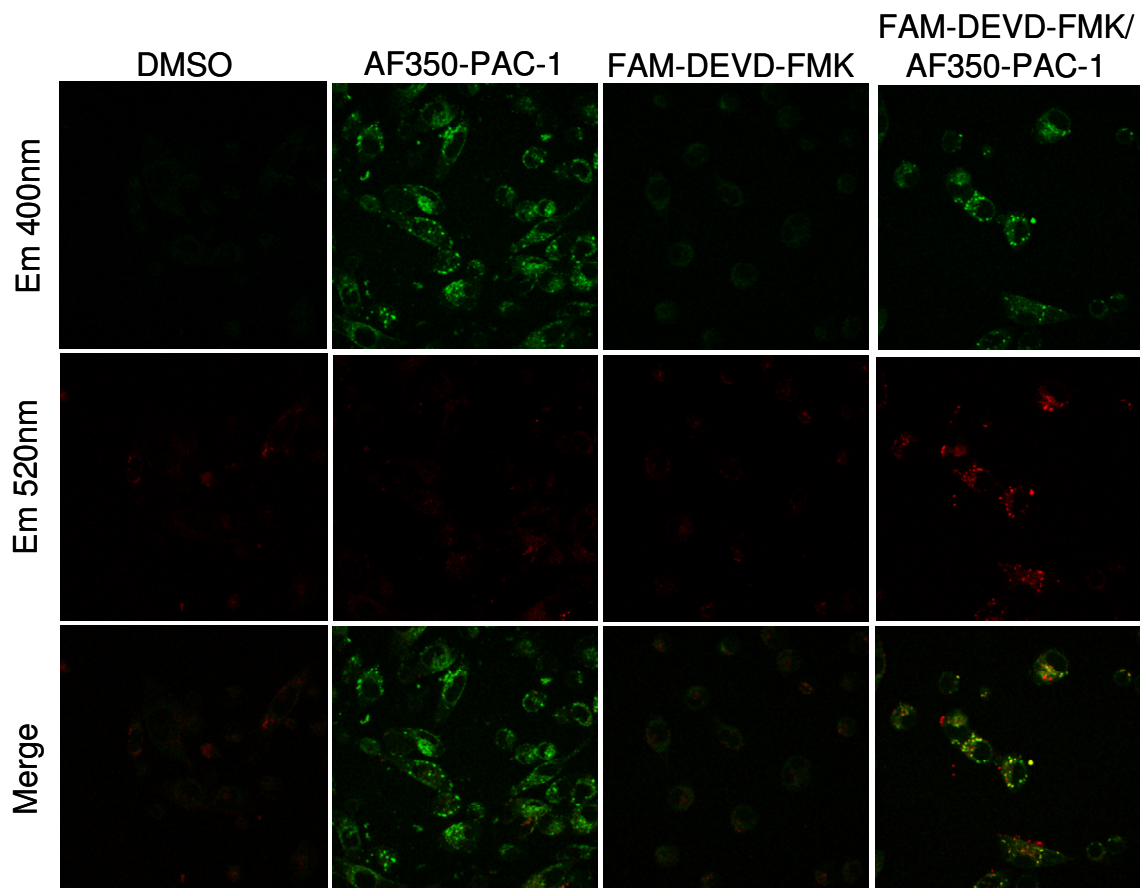

**Figure S7.** Colocalization of **AF350-PAC-1** and caspase-3/-7. Wide field images showing the colocalization of **AF350-PAC-1** and spots of intense caspase-3/-7 activity as visualized by FAM-DEVD-fmk.

Sample 1

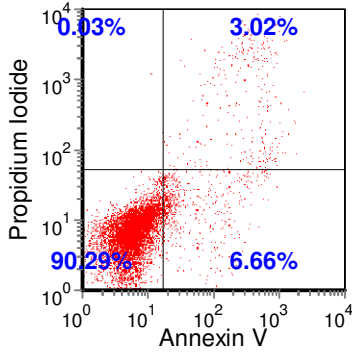

Sample 2

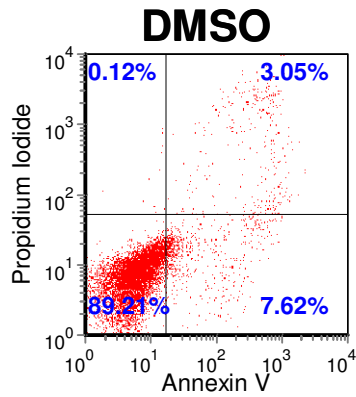

Sample 3

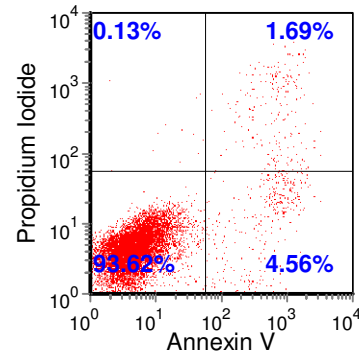

**PAC-1**

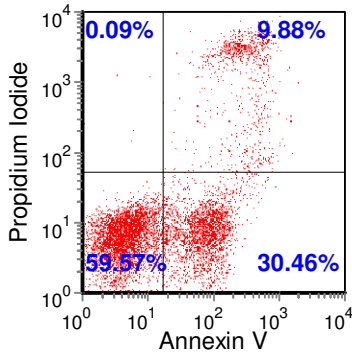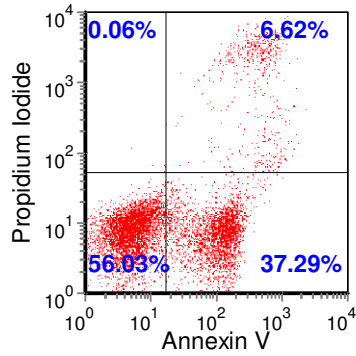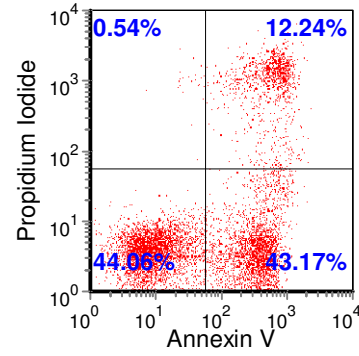

**Compound 2d**

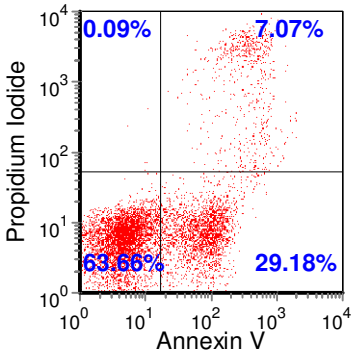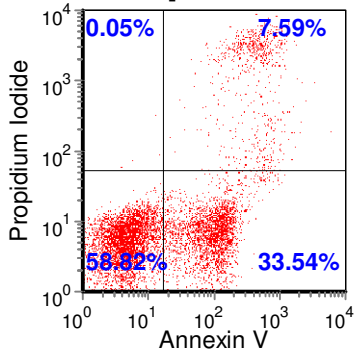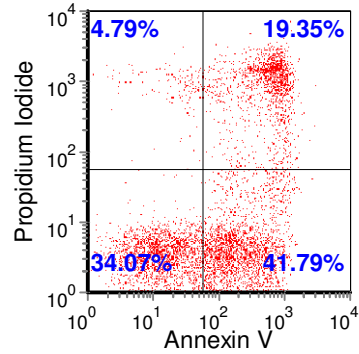

**Compound 4c**

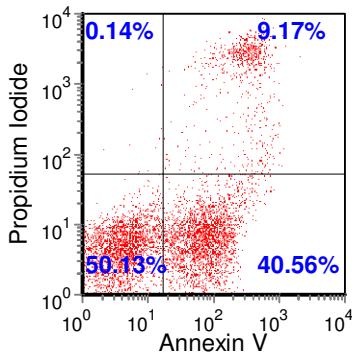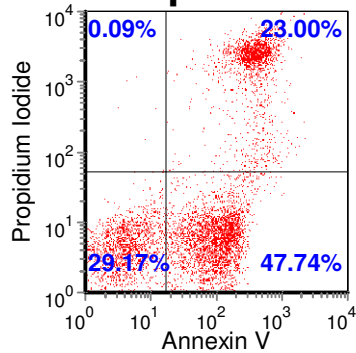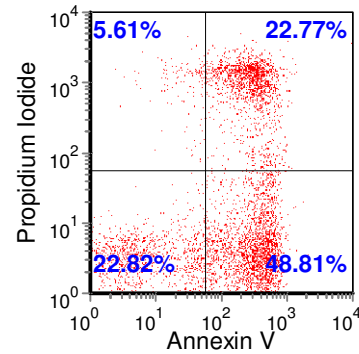

**Figure S8.** Assessment of apoptotic induction by **PAC-1** derivatives. U-937 cells were treated with **PAC-1**, **2d**, **4c** (50  $\mu$ M each) or vehicle control for 12 hours, then stained with Annexin V and PI. All three compounds induce apoptosis as assessed by the Annexin V positive/PI negative populations. Results shown are of 3 separate experiments.



# Chemical Information

## Materials and Methods

### *General*

All reactions requiring anhydrous conditions were conducted under a positive atmosphere of nitrogen or argon in oven-dried glassware. Standard syringe techniques were used for anhydrous addition of liquids. Dry tetrahydrofuran was obtained by passing over activated alumina columns or molecular sieves in a commercial solvent purification system (Innovative Technologies). Unless otherwise noted, all starting materials, solvents, and reagents were acquired from commercial suppliers and used without further purification. Flash chromatography was performed using 230-400 mesh silica gel. Hydrazide **5**,<sup>3</sup> **PAC-1 (1)**,<sup>3</sup> **1a**,<sup>3</sup> **1h**,<sup>3</sup> 3-allylsalicylaldehyde,<sup>4</sup> 2-mercaptobenzaldehyde,<sup>5</sup> **23**,<sup>3</sup> **30**,<sup>6</sup> **44**<sup>3</sup> were prepared according to the literature method with modifications.

### *Compound Analysis.*

All NMR experiments were recorded either in CDCl<sub>3</sub> (Sigma), CD<sub>3</sub>OD (sigma) or Acetone-*d*6 (Sigma) on a Varian Unity 400 MHz or 500 MHz spectrometer with residual undeuterated solvent as the internal reference. Chemical shift,  $\delta$  (ppm); coupling constants, *J* (Hz); multiplicity (s = singlet, d = doublet, t = triplet, q = quartet, m = multiplet); and integration are reported. High-resolution mass spectral data was recorded on a Micromass Q-ToF Ultima hybrid quadrupole/time-of-flight ESI mass spectrometer at the University of Illinois Mass Spectrometry Laboratory. All melting points are uncorrected. Analytical HPLC performed on a Altima C18 column, 2.1x20 mm, mobile phase A is 0.1% TFA in H<sub>2</sub>O, B is acetonitrile using a gradient system from 0-45% B over 5 min, then 45-55% B from 5-10 min, then 55-100% B over 10-15 min, constant 100% over 15-20 min, and from 100-0% over 20-25. LC-MS performed on a C18 column, 2.1x5 mm, mobile phase A is 0.1% TFA in H<sub>2</sub>O, B is acetonitrile using a gradient system with constant 0% B over 0-2 min, then 0-50% B from 2-5 min, then 50-100% B over 5-7 min, constant 100% over 7-8 min, and from 100-0% over 8-10.

## Scheme S1. Syntheses of PAC-1 derivatives

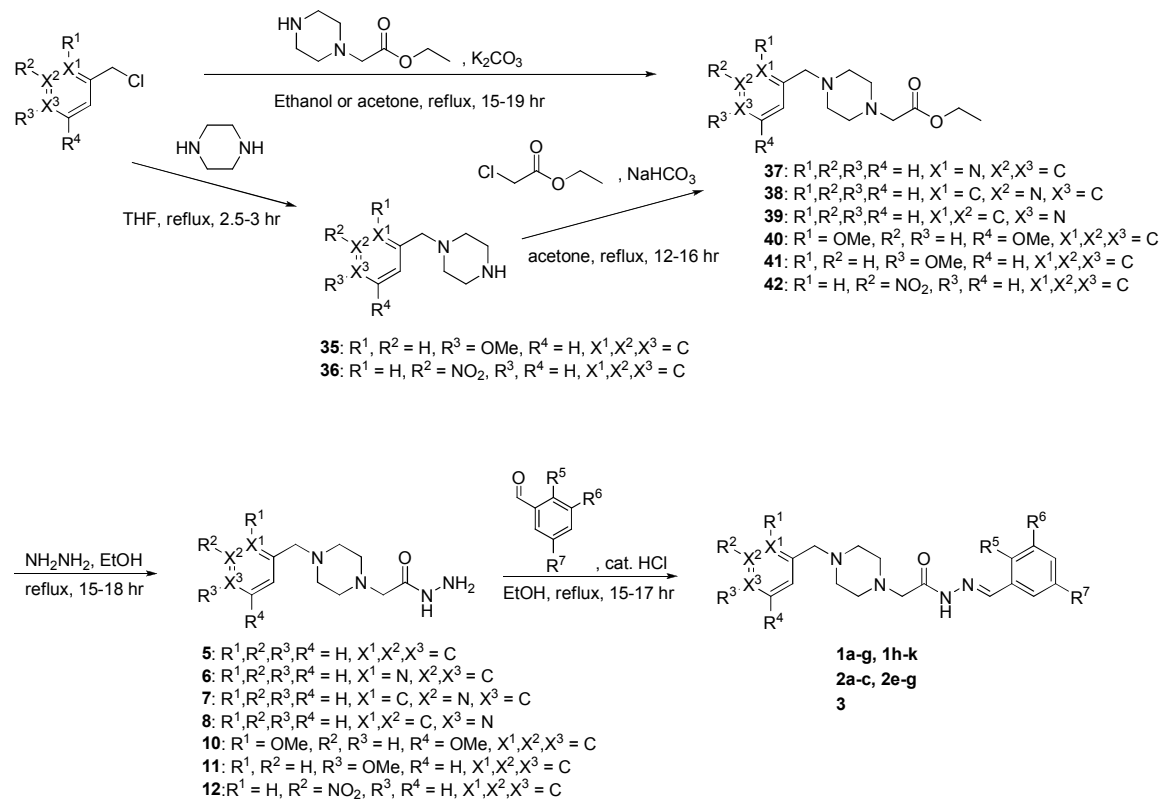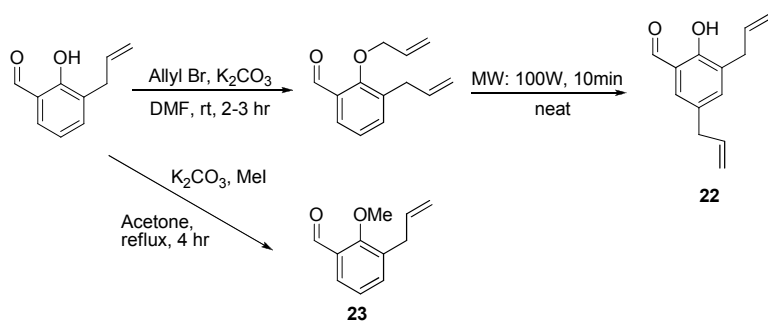

### General Procedure for 1-Benzylpiperazines **35-36**

Anhydrous piperazine (6 equiv.) was added to THF (6 mL), and the mixture was heated to reflux until the piperazine was fully dissolved. To the solution substituted benzyl chloride (1 equiv.) was added dropwise. White precipitate was formed immediately. The reaction mixture was refluxed for 2.5-3 hr monitoring by TLC. The stirring mixture was cooled and then filtered. The solids were washed with THF (3 mL) and then EtOAc (3 mL). The combined organic layer was concentrated *in vacuo*, which was then washed with basic water with 5% brine and KOH (pH >12). The aqueous layer was extracted with CH<sub>2</sub>Cl<sub>2</sub> (3 x 10mL) and

EtOAc (10 mL) at pH > 12. The organic layers were combined, dried over Na<sub>2</sub>SO<sub>4</sub> and concentrated *in vacuo*. The crude product was purified by flash column chromatography on silica gel (1:4 MeOH/EtOAc).

### 1-(4-Methoxybenzyl)piperazine (35)

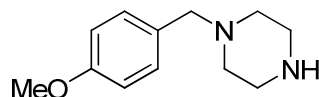

The general procedure was followed: 4-Methoxybenzyl chloride (0.5 mL, 3.7 mmol, 1 equiv.), piperazine (1.9 g, 22.2 mmol, 6 equiv.), THF (8 mL). Purification with flash column chromatography on silica gel (1:4 MeOH/EtOAc) afforded **35** (0.67 g, 88%) as light yellow liquid. <sup>1</sup>H NMR (400 MHz, CDCl<sub>3</sub>): δ 7.17 (d, *J* = 8.6 Hz, 2H), 6.79 (d, *J* = 8.7 Hz, 2H), 3.73 (s, 3H), 3.37 (s, 2H), 2.81 (t, *J* = 4.9 Hz, 4H), 2.33 (broad s, 4H), 1.50 (s, 1H). <sup>13</sup>C NMR (101 MHz, CDCl<sub>3</sub>): δ 158.8, 130.6, 130.2, 113.7, 63.3, 55.4, 54.6, 46.3. HRMS (ESI): found: 207.1501 (M+1); calcd for C<sub>12</sub>H<sub>19</sub>N<sub>2</sub>O: 207.1497. IR (neat): 3288 cm<sup>-1</sup>.

### 1-(3-Nitrobenzyl)piperazine (36)

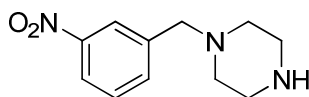

The general procedure was followed: 3-Nitrobenzyl chloride (5 g, 29.1 mmol, 1 equiv.), piperazine (15.1g, 174.6 mmol, 6 equiv.), THF (64 mL). Purification with flash column chromatography on silica gel (1:4 MeOH/EtOAc) afforded **36** (6.07 g, 94%) as yellow liquid. <sup>1</sup>H NMR (500 MHz, CDCl<sub>3</sub>): δ 7.61 (d, *J* = 7.6 Hz, 1H), 8.13 (s, 1H), 8.02 (d, *J* = 8.2 Hz, 1H), 7.41 (t, *J* = 7.9 Hz, 1H), 3.50 (s, 2H), 2.82 (t, *J* = 4.8 Hz, 4H), 2.36 (broad s, 4H), 1.54 (s, 1H). <sup>13</sup>C NMR (126 MHz, CDCl<sub>3</sub>): δ 148.5, 141.0, 135.3, 129.3, 123.9, 122.3, 62.8, 54.7, 46.2. HRMS (ESI): found: 222.1238 (M+1); calcd for C<sub>11</sub>H<sub>16</sub>N<sub>3</sub>O<sub>2</sub>: 222.1243. IR (neat): 3389, 1530, 1345 cm<sup>-1</sup>.

### General Procedure for Ethyl 2-(4-Benzylpiperazin-1-yl)acetate **41-42**

To a stirred mixture of substituted 1-benzylpiperazine (1 equiv.) and NaHCO<sub>3</sub> (1.25 equiv.) in acetone (7 mL) was added ethyl chloroacetate (1.1 equiv.). The reaction was refluxed for 20-22 hr monitoring by TLC. The solution was filtered and the solid was washed with acetone (10 mL). The filtrate was concentrated *in vacuo*, and then purified by flash column chromatography on silica gel (1:1 EtOAc/Hexanes).

### Ethyl 2-(4-(4-methoxybenzyl)piperazin-1-yl)acetate (**41**)

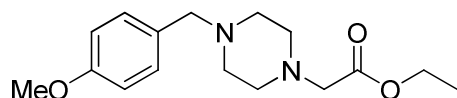

The general procedure was followed: **35** (0.67 g, 3.2 mmol, 1 equiv.), ethyl chloroacetate (0.39 mL, 3.6 mmol, 1.1 equiv.), NaHCO<sub>3</sub> (0.34 g, 4.06 mmol, 1.25 equiv.), acetone (7 mL). Purification with flash column chromatography on silica gel (1:1 EtOAc/Hexanes) afforded **41** (0.73 g, 77%) as orange oil. <sup>1</sup>H NMR (500 MHz, CDCl<sub>3</sub>): δ 7.18 (d, *J* = 8.6 Hz, 2H), 6.80 (d, *J* = 8.6 Hz, 2H), 4.13 (q, *J* = 7.1 Hz, 2H), 3.74 (s, 3H), 3.41 (s, 2H), 3.15 (s, 2H), 2.51 (broad d, 8H), 1.22 (t, *J* = 7.1 Hz, 3H). <sup>13</sup>C NMR (126 MHz, CDCl<sub>3</sub>): δ 170.5, 158.9, 130.5, 130.3, 113.7, 62.5, 60.8, 59.8, 55.4, 53.3, 52.9, 14.5. HRMS (ESI): found: 293.1869 (M+1); calcd for C<sub>16</sub>H<sub>25</sub>N<sub>2</sub>O<sub>3</sub>: 293.1865. IR (neat): 1742, 1660 cm<sup>-1</sup>.

### Ethyl 2-(4-(3-nitrobenzyl)piperazin-1-yl)acetate (**42**)

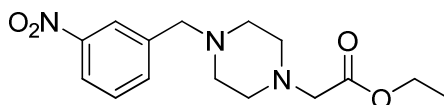

The general procedure was followed: **36** (6.01 g, 27.2 mmol, 1 equiv.), ethyl chloroacetate (3.2 mL, 29.9 mmol, 1.1 equiv.), NaHCO<sub>3</sub> (2.85 g, 34.0 mmol, 1.25 equiv.), acetone (54 mL). Purification with flash column chromatography on silica gel (1:1 EtOAc/Hexanes) afforded **42** (7.18 g, 86%) as light orange liquid. <sup>1</sup>H NMR (500 MHz, CDCl<sub>3</sub>): δ 8.13 (s, 1H), 8.02 (d, *J* = 8.2 Hz, 1H), 7.60 (d, *J* = 7.6 Hz, 1H), 7.42 (t, *J* = 7.9 Hz, 1H), 4.11 (q, *J* = 7.1 Hz, 2H), 3.54 (s, 2H), 3.15 (s, 2H), 2.52 (d, *J* = 7.1 Hz, 8H), 1.20 (t, *J* = 7.1 Hz, 3H). <sup>13</sup>C NMR (126 MHz, CDCl<sub>3</sub>): δ 170.4, 148.5, 140.9, 135.2, 129.3, 123.8, 122.3, 62.1, 60.8, 59.6, 53.1, 53.0, 14.4. HRMS (ESI): found: 294.1559 (M+1); calcd for C<sub>13</sub>H<sub>20</sub>N<sub>5</sub>O<sub>3</sub>: 294.1566.

### General Procedure for Ethyl 2-(4-Benzylpiperazin-1-yl)acetate **37-40**

To a stirred mixture of picolyl halide hydrohalide or substituted benzyl chloride (1.2 equiv.) and K<sub>2</sub>CO<sub>3</sub> (3 equiv.) in ethanol or acetone (7 mL) was added ethyl 2-(piperazin-1-yl)acetate (1 equiv.). The reaction was refluxed for 15-19 hr monitoring by TLC. The solution was filtered and the solid was washed with ethanol (10 mL). The filtrate was concentrated *in vacuo*, and then purified by flash column chromatography on silica gel (1:1 EtOAc/Hexanes).

**Ethyl 2-(4-(pyridin-2-ylmethyl)piperazin-1-yl)acetate (37)**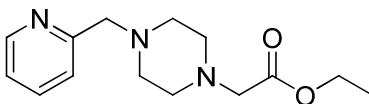

The general procedure was followed: 2-picolyl bromide hydrobromide (0.49 g, 1.9 mmol, 1.2 equiv.), ethyl 2-(piperazin-1-yl)acetate (0.28 g, 1.6 mmol, 1 equiv.),  $K_2CO_3$  (0.67 g, 4.8 mmol, 3 equiv.), ethanol (7 mL). Purification with flash column chromatography on silica gel (1:1 EtOAc/Hexanes) afforded **37** (0.28 g, 65%) as deep yellow oil.  $^1H$  NMR (500 MHz,  $CDCl_3$ ): 8.49 (d,  $J = 4.9$  Hz, 1H), 7.82 (dt,  $J = 1.7$  Hz,  $J = 7.7$  Hz, 1H), 7.54 (d,  $J = 7.8$  Hz, 1H), 7.32 (dd,  $J = 5.5$  Hz,  $J = 7.0$  Hz, 1H), 4.17 (q,  $J = 7.1$  Hz, 2H), 3.67 (s, 2H), 3.24 (s, 2H), 2.61 (broad d, 8H), 1.26 (t,  $J = 7.1$  Hz, 3H).  $^{13}C$  NMR (126 MHz,  $CDCl_3$ ): 170.3, 157.9, 148.5, 137.5, 124.0, 122.8, 63.5, 60.5, 58.6, 52.6, 52.5, 13.4. HRMS (ESI): found: 264.1719 (M+1); calcd for  $C_{14}H_{22}N_3O_2$ : 264.1712

**Ethyl 2-(4-(pyridin-3-ylmethyl)piperazin-1-yl)acetate (38)**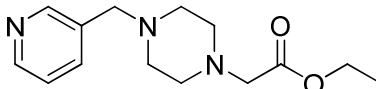

The general procedure was followed: 3-picolyl chloride hydrochloride (0.32 g, 1.9 mmol, 1.2 equiv.), ethyl 2-(piperazin-1-yl)acetate (0.28 g, 1.6 mmol, 1 equiv.),  $K_2CO_3$  (0.67 g, 4.8 mmol, 3 equiv.), ethanol (7 mL). Purification with flash column chromatography on silica gel (1:1 EtOAc/Hexanes) afforded **38** (0.35 g, 82%) as deep yellow oil.  $^1H$  NMR (500 MHz,  $CD_3OD$ ):  $\delta$  8.50 (d,  $J = 1.5$  Hz, 1H), 8.44 (dd,  $J = 1.5$  Hz,  $J = 4.8$  Hz, 1H), 7.83 (d,  $J = 7.8$  Hz, 1H), 7.41 (dd,  $J = 4.5$  Hz,  $J = 7.7$  Hz, 1H), 4.16 (q,  $J = 7.1$  Hz, 2H), 3.58 (s, 2H), 3.23 (s, 2H), 2.57 (broad d, 8H), 1.25 (t,  $J = 7.1$  Hz, 3H).  $^{13}C$  NMR (126 MHz,  $CDCl_3$ ):  $\delta$  170.3, 149.8, 147.8, 138.1, 134.2, 124.0, 60.5, 59.5, 58.5, 52.5, 52.3, 13.4. HRMS (ESI): found: 264.1716 (M+1); calcd for  $C_{14}H_{22}N_3O_2$ : 264.1712

**Ethyl 2-(4-(pyridin-4-ylmethyl)piperazin-1-yl)acetate (39)**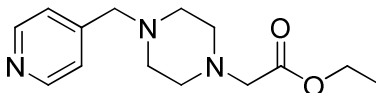

The general procedure was followed: 4-picolyl chloride hydrochloride (0.32 g, 1.9 mmol, 1.2 equiv.), ethyl 2-(piperazin-1-yl)acetate (0.28 g, 1.6 mmol, 1 equiv.),  $K_2CO_3$  (0.67 g, 4.8 mmol, 3 equiv.), ethanol (7 mL). Purification with flash column chromatography on silica gel (1:1 EtOAc/Hexanes) afforded **39** (0.31 g, 72%) as deep yellow oil.  $^1H$  NMR (400 MHz,  $CDCl_3$ ):  $\delta$  8.51 (d,  $J = 5.8$  Hz, 2H), 7.25 (d,  $J = 5.7$  Hz, 2H), 4.16 (q,

$J = 7.1$  Hz, 2H), 3.50 (s, 2H), 3.19 (s, 2H), 2.56 (broad d, 8H), 1.24 (t,  $J = 7.1$  Hz, 3H).  $^{13}\text{C}$  NMR (126 MHz,  $\text{CDCl}_3$ ):  $\delta$  170.4, 150.0, 147.7, 124.0, 61.8, 60.8, 59.6, 53.1, 53.1, 14.4. HRMS (ESI): found: 264.1714 (M+1); calcd for  $\text{C}_{14}\text{H}_{22}\text{N}_3\text{O}_2$ : 264.1712  
IR (neat): 1738, 1660  $\text{cm}^{-1}$ .

#### Ethyl 2-(4-(2,5-dimethoxybenzyl)piperazin-1-yl)acetate (40)

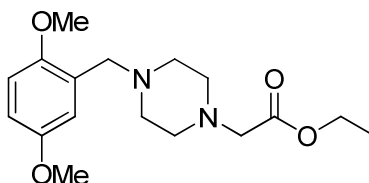

The general procedure was followed: 2,5-dimethoxybenzylchloride (5.0 g, 26.8 mmol, 1.2 equiv.), ethyl 2-(piperazin-1-yl)acetate (3.8 g, 22.3 mmol, 1 equiv.),  $\text{K}_2\text{CO}_3$  (9.2 g, 66.9 mmol, 3 equiv.), acetone (40 mL). Purification with flash column chromatography on silica gel (1:1 EtOAc/Hexanes) afforded **40** (5.3 g, 73%) as deep yellow oil.  $^1\text{H}$  NMR (500 MHz,  $\text{CDCl}_3$ ):  $\delta$  6.94 (d,  $J = 3.0$  Hz, 1H), 6.76 (apparent d,  $J = 8.8$  Hz, 1H), 6.71 (dd,  $J = 3.0$  Hz,  $J = 8.9$  Hz, 1H), 4.16 (q,  $J = 7.1$  Hz, 2H), 3.75 (s, 6H), 3.54 (s, 2H), 3.18 (s, 2H), 2.58 (broad s, 8H), 1.25 (t,  $J = 7.1$  Hz, 3H).  $^{13}\text{C}$  NMR (126 MHz,  $\text{CDCl}_3$ ):  $\delta$  170.6, 153.7, 152.3, 127.6, 116.6, 112.3, 111.7, 60.8, 59.8, 56.3, 56.1, 55.9, 53.4, 52.9, 14.5. HRMS (ESI): found: 323.1982 (M+1); calcd for  $\text{C}_{17}\text{H}_{27}\text{N}_2\text{O}_4$ : 323.1971. IR (neat): 1742, 1672  $\text{cm}^{-1}$ .

#### General Procedure for 2-(4-benzylpiperazin-1-yl)acetohydrazide **6-8** and **10-12**

To a stirred solution of substituted ethyl 2-(4-Benzylpiperazin-1-yl)acetate (1 equiv.) in ethanol (1.9 mL, 0.5 M) was added anhydrous hydrazine (3 equiv.). The reaction was refluxed for 15-18 hr monitoring by TLC. The reaction mixture was concentrated *in vacuo*. The residue was dissolved in  $\text{CH}_2\text{Cl}_2$  and washed with water (10 mL) and brine (10 mL). The aqueous layer was extracted with  $\text{CH}_2\text{Cl}_2$  (3 x 10 mL) and EtOAc (10 mL). The combined organic layer was dried over  $\text{Na}_2\text{SO}_4$ , filtered and concentrated *in vacuo*. The crude product was purified by flash column chromatography on silica gel (1:4 MeOH/EtOAc).

#### 2-(4-(Pyridin-2-ylmethyl)piperazin-1-yl)acetohydrazide (6)

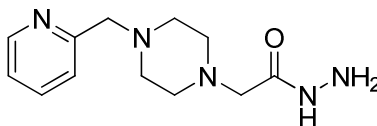

The general procedure was followed: ethyl 2-(4-(pyridin-2-ylmethyl)piperazin-1-yl)acetate (0.25 g, 0.95 mmol, 1 equiv.), anhydrous hydrazine (90  $\mu$ L, 2.9 mmol, 3 equiv.), ethanol (1.9 mL). Purification with flash column chromatography on silica gel (1:4 MeOH/EtOAc) afforded **6** (0.17 g, 71%) as yellow oil.  $^1\text{H}$  NMR (500 MHz,  $\text{CD}_3\text{OD}$ ):  $\delta$  8.49 (d,  $J = 4.9$  Hz, 1H), 7.83 (dt,  $J = 1.8$  Hz,  $J = 7.7$  Hz, 1H), 7.54 (d,  $J = 7.8$  Hz, 1H), 7.33 (dd,  $J = 5.0$  Hz,  $J = 7.4$  Hz, 1H), 3.68 (s, 2H), 3.06 (s, 2H), 2.58 (broad s, 8H).  $^{13}\text{C}$  NMR (126 MHz,  $\text{CDCl}_3$ ):  $\delta$  170.2, 157.8, 148.4, 137.5, 124.1, 122.8, 63.5, 59.9, 53.0, 52.8. HRMS (ESI): found: 250.1670 (M+1); calcd for  $\text{C}_{12}\text{H}_{20}\text{N}_5\text{O}_2$ : 250.1668

IR (neat):

### 2-(4-(Pyridin-3-ylmethyl)piperazin-1-yl)acetohydrazide (7)

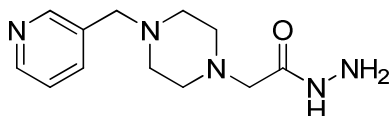

The general procedure was followed: ethyl 2-(4-(pyridin-3-ylmethyl)piperazin-1-yl)acetate (0.25 g, 0.95 mmol, 1 equiv.), anhydrous hydrazine (90  $\mu$ L, 2.9 mmol, 3 equiv.), ethanol (1.9 mL). Purification with flash column chromatography on silica gel (1:4 MeOH/EtOAc) afforded **7** (0.17 g, 72%) as yellow oil.  $^1\text{H}$  NMR (500 MHz,  $\text{CD}_3\text{OD}$ ):  $\delta$  8.51 (d,  $J = 1.5$  Hz, 1H), 8.45 (dd,  $J = 1.6$  Hz,  $J = 4.9$  Hz, 1H), 7.84 (d,  $J = 7.9$  Hz, 1H), 7.43 (dd,  $J = 4.6$  Hz,  $J = 7.4$  Hz, 1H), 3.60 (s, 2H), 3.05 (s, 2H), 2.55 (broad s, 8H).  $^{13}\text{C}$  NMR (126 MHz,  $\text{CDCl}_3$ ):  $\delta$  170.2, 149.8, 147.8, 138.2, 134.2, 124.0, 59.9, 59.5, 53.0, 52.6. HRMS (ESI): found: 250.1670 (M+1); calcd for  $\text{C}_{12}\text{H}_{20}\text{N}_5\text{O}_2$ : 250.1668 IR (neat):

### 2-(4-(Pyridin-4-ylmethyl)piperazin-1-yl)acetohydrazide (8)

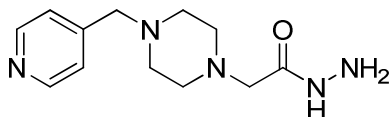

The general procedure was followed: ethyl 2-(4-(pyridin-4-ylmethyl)piperazin-1-yl)acetate (0.25 g, 0.95 mmol, 1 equiv.), anhydrous hydrazine (90  $\mu$ L, 2.9 mmol, 3 equiv.), ethanol (1.9 mL). Purification with flash column chromatography on silica gel (1:4 MeOH/EtOAc) afforded **8** (0.18 g, 78%) as yellow oil.  $^1\text{H}$  NMR (500 MHz,  $\text{CD}_3\text{OD}$ ):  $\delta$  8.47 (d,  $J = 6.0$  Hz, 2H), 7.42 (d,  $J = 5.9$  Hz, 2H), 3.58 (s, 2H), 3.05 (s, 2H), 2.54 (broad d, 8H).  $^{13}\text{C}$  NMR (126 MHz,  $\text{CDCl}_3$ ):  $\delta$  170.1, 148.9, 148.9, 124.6, 61.1, 59.9, 53.1, 52.7. HRMS (ESI): 250.1669 (M+1); calcd for  $\text{C}_{12}\text{H}_{20}\text{N}_5\text{O}_2$ : 250.1668. IR (neat): 3347, 1665  $\text{cm}^{-1}$ .

### 2-(4-(2,5-Dimethoxybenzyl)piperazin-1-yl)acetohydrazide (10)

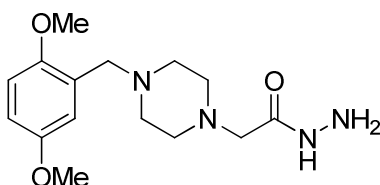

The general procedure was followed: ethyl 2-(4-(2,5-dimethoxybenzyl)piperazin-1-yl)acetate (0.19 g, 0.60 mmol, 1 equiv.), anhydrous hydrazine (58  $\mu$ L, 1.81 mmol, 3 equiv.), ethanol (1.2 mL). Purification with flash column chromatography on silica gel (1:4 MeOH/EtOAc) afforded **10** (0.16 g, 88%) as off-white semi-solid.  $^1\text{H}$  NMR (500 MHz,  $\text{CDCl}_3$ ):  $\delta$  8.16 (s, 1H), 6.93 (d,  $J = 2.9$  Hz, 1H), 6.76 (m, 2H), 3.84 (s, 2H), 3.76 (s, 3H), 3.75 (s, 3H), 3.54 (s, 2H), 3.05 (s, 2H), 2.53 (s, 8H).  $^{13}\text{C}$  NMR (126 MHz,  $\text{CDCl}_3$ ):  $\delta$  170.7, 153.7, 152.3, 127.2, 116.7, 112.5, 111.9, 60.8, 56.4, 56.0, 55.9, 53.9, 53.2. HRMS (ESI): 309.1928 (M+1); calcd for  $\text{C}_{15}\text{H}_{25}\text{N}_4\text{O}_3$ : 309.1927. IR (neat): 3584, 1670  $\text{cm}^{-1}$ .

### 2-(4-(4-Methoxybenzyl)piperazin-1-yl)acetohydrazide (11)

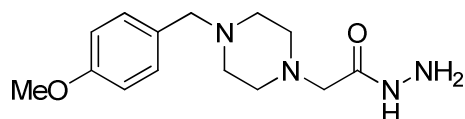

The general procedure was followed: ethyl 2-(4-(4-methoxybenzyl)piperazin-1-yl)acetate (0.70 g, 2.4 mmol, 1 equiv.), anhydrous hydrazine (220  $\mu$ L, 7.1 mmol, 3 equiv.), ethanol (4.8 mL). Purification with flash column chromatography on silica gel (1:4 MeOH/EtOAc) afforded **11** (0.54 g, 82%) as off-white solid.  $^1\text{H}$  NMR (500 MHz,  $\text{CDCl}_3$ ):  $\delta$  8.13 (s, 1H), 7.20 (d,  $J = 8.6$  Hz, 2H), 6.84 (d,  $J = 8.6$  Hz, 2H), 3.84 (d,  $J = 3.9$  Hz, 2H), 3.79 (s, 3H), 3.44 (s, 2H), 3.06 (s, 2H), 2.46 (s, 8H).  $^{13}\text{C}$  NMR (126 MHz,  $\text{CDCl}_3$ ):  $\delta$  170.8, 159.0, 130.5, 130.1, 113.8, 62.5, 60.8, 55.5, 53.9, 53.2. HRMS (ESI): 279.1811 (M+1); calcd for  $\text{C}_{14}\text{H}_{23}\text{N}_4\text{O}_2$ : 279.1821. IR (neat): 3584, 17, 1676  $\text{cm}^{-1}$ . m.p.: 111.5-112.5  $^\circ\text{C}$ .

### 2-(4-(3-Nitrobenzyl)piperazin-1-yl)acetohydrazide (12)

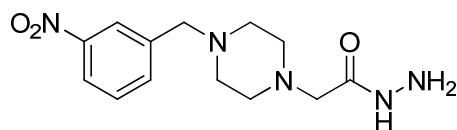

The general procedure was followed: ethyl 2-(4-(3-nitrobenzyl)piperazin-1-yl)acetate (7.0 g, 22.7 mmol, 1 equiv.), anhydrous hydrazine (2.1 mL, 68.2 mmol, 3 equiv.), ethanol (45 mL). Purification with flash column chromatography on silica gel (1:4 MeOH/EtOAc) afforded **12** (5.4 g, 82%) as light yellow oil.  $^1\text{H}$  NMR (500



MHz, CDCl<sub>3</sub>): δ 8.13 (s, 1H), 8.02 (d, *J* = 8.2 Hz, 1H), 8.11 (s, 1H), 7.59 (d, *J* = 7.7 Hz, 1H), 7.42 (t, *J* = 7.9 Hz, 1H), 3.82 (s, 2H), 3.52 (s, 2H), 3.01 (s, 2H), 2.45 (d, 8H). <sup>13</sup>C NMR (126 MHz, CDCl<sub>3</sub>): δ 170.5, 148.5, 140.7, 135.2, 129.4, 123.8, 122.4, 62.0, 60.7, 53.7, 53.2. HRMS (ESI): 294.1559 (M+1); calcd for C<sub>13</sub>H<sub>20</sub>N<sub>5</sub>O<sub>3</sub>: 294.1566.

*General Procedure for N'-(3-allyl-2-hydroxybenzylidene)-2-(4-benzylpiperazin-1-yl)acetohydrazide 1b–g, 1j, 1k, 2a–g, 3*

To a stirred solution of substituted benzaldehyde (1 equiv.) in ethanol (6 mL), 2-(4-benzylpiperazin-1-yl)acetohydrazide (1.8 equiv.) and HCl (10 mol%) were added. The reaction was refluxed for 12–16 hr monitoring by TLC. The solution was concentrated *in vacuo*, and then purified by flash column chromatography on silica gel (1:4 MeOH/EtOAc).

#### 2-(4-Benzylpiperazin-1-yl)-N'-(2-(methylthio)benzylidene)acetohydrazide (1b)

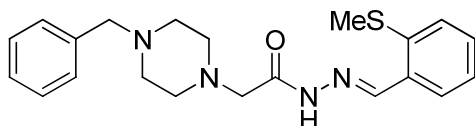

The general procedure was followed: hydrazide **5** (0.45 g, 1.8 mmol, 1.8 equiv.), 2-(methylthio)benzaldehyde (0.14 mL, 1.0 mmol, 1 equiv.), HCl (8 μL, 12M), ethanol (6 mL). Purification with flash column chromatography on silica gel (1:4 MeOH/EtOAc) afforded **1b** (0.34 g, 88%) as light yellow semi-solid. <sup>1</sup>H NMR (500 MHz, CDCl<sub>3</sub>) indicated a 87:13 ratio of two geometrical isomers: δ 10.11 (s, 1H x 0.87 isomer A), 8.67 (s, 1H x 0.13 isomer B), 8.65 (s, 1H x 0.87 isomer A), 8.12 (s, 1H x 0.13 isomer B), 8.05 (d, *J* = 8.0 Hz, 1H x 0.87 isomer A), 7.74 (d, 1H, *J* = 7.9 Hz x 0.13 isomer B), 7.36 (m, 2H), 7.33 (m, 1H), 7.28 (m, 1H), 7.21 (m, 1H), 3.70 (s, 2H x 0.13 isomer B), 3.55 (s, 2H x 0.87 isomer A), 3.53 (s, 2H x 0.13 isomer B), 3.20 (s, 2H x 0.87 isomer A), 2.58 (broad d, 8H x 0.87 isomer A), 2.50 (s, 3H), 2.46 (d, 8H x 0.13 isomer B), 1.65 (s, 3H x 0.13 isomer B). <sup>13</sup>C NMR (126 MHz, CDCl<sub>3</sub>): δ 172.3, 166.8, 146.0, 142.7, 138.7, 138.6, 138.1, 132.4, 132.2, 130.9, 130.2, 129.5, 129.3, 128.5, 128.4, 128.1, 128.0, 127.7, 127.4, 127.3, 126.1, 125.5, 63.2, 63.0, 63.0, 61.3, 58.5, 53.8, 53.7, 53.1, 17.4, 17.1. HRMS (ESI): 383.1900 (M+1); calcd for C<sub>21</sub>H<sub>27</sub>N<sub>4</sub>OS: 383.1906. IR (neat): 1677, 1588 cm<sup>-1</sup>. Purity: 99% (HPLC).

### ***N'*-(2-aminobenzylidene)-2-(4-benzylpiperazin-1-yl)acetohydrazide (1c)**

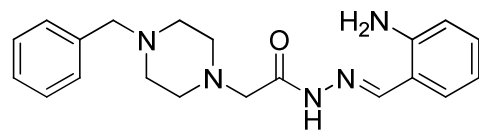

The general procedure was followed: hydrazide **5** (0.54 g, 2.2 mmol, 1.8 equiv.), 2-aminobenzaldehyde (0.15 g, 1.2 mmol, 1 equiv.), HCl (10  $\mu$ L, 12M), ethanol (6 mL). Purification with flash column chromatography on silica gel (1:4 MeOH/EtOAc) afforded **1c** (0.33 g, 78%) as light yellow solid.  $^1\text{H}$  NMR (500 MHz,  $\text{CDCl}_3$ ):  $\delta$  9.96 (s, 1H), 8.13 (s, 1H), 7.33 (m, 2H), 7.28 (m, 1H), 7.14 (dd,  $J = 8.0$  Hz,  $J = 10.2$  Hz, 2H), 6.67 (m, 2H), 6.12 (s, 2H), 3.55 (s, 2H), 3.18 (s, 2H), 2.58 (d, 8H).  $^{13}\text{C}$  NMR (126 MHz,  $\text{CDCl}_3$ ):  $\delta$  165.8, 151.1, 147.7, 138.0, 132.7, 131.2, 129.4, 128.6, 127.5, 116.3, 116.0, 115.1, 63.1, 61.2, 53.9, 53.3. HRMS (ESI): 352.2137 (M+1); calcd for  $\text{C}_{20}\text{H}_{26}\text{N}_5\text{O}$ : 352.2137. IR (neat): 3423, 3310, 3208, 1685, 1617  $\text{cm}^{-1}$ . m.p.: 168-169  $^\circ\text{C}$ . Purity: 99% (LC-MS).

### **2-((2-(2-(4-benzylpiperazin-1-yl)acetyl)hydrazono)methyl)benzoic acid (1d)**

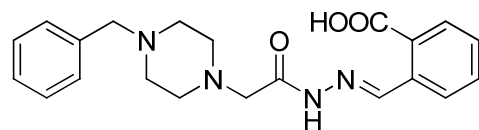

The general procedure was followed: hydrazide **5** (0.54 g, 2.2 mmol, 1.8 equiv.), 2-carboxybenzaldehyde (0.18 g, 1.2 mmol, 1 equiv.), HCl (10  $\mu$ L, 12M), ethanol (6 mL). Purification with flash column chromatography on silica gel (1:4 MeOH/EtOAc) afforded **1d** (0.36 g, 79%) as white solid.  $^1\text{H}$  NMR (500 MHz,  $\text{CD}_3\text{OD}$ ) indicated a 75:25 ratio of two geometrical isomers:  $\delta$  8.87 (s, 1H x 0.75 isomer A), 8.61 (s, 1H x 0.25 isomer B), 8.08 (m, 1H x 0.75 isomer A), 7.92 (m, 1H x 0.25 isomer B), 7.69 (m, 1H), 7.34 (m, 7H), 3.75 (s, 2H x isomer B), 3.63 (s, 2H x isomer B), 3.59 (s, 2H x isomer A), 3.14 (s, 2H x isomer A), 2.69 (broad d, 8H).  $^{13}\text{C}$  NMR (126 MHz,  $\text{CD}_3\text{OD}$ ):  $\delta$  179.1, 171.9, 153.4, 145.5, 141.0, 135.4, 135.1, 133.7, 133.5, 133.2, 132.4, 132.3, 132.1 (2 partially resolved peaks), 131.2, 130.0 (2 partially resolved peaks), 129.1, 66.6, 64.0, 56.9, 56.8, 56.4, 56.3. HRMS (ESI): 381.1938 (M+1); calcd for  $\text{C}_{21}\text{H}_{25}\text{N}_4\text{O}_3$ : 381.1927. IR (neat): 3364 (br), 1675  $\text{cm}^{-1}$ . m.p.: 150-151.5  $^\circ\text{C}$ . Purity: 99% (HPLC).

### **Methyl 2-((2-(2-(4-benzylpiperazin-1-yl)acetyl)hydrazono)methyl)benzoate (1e)**

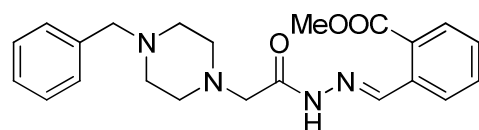

The general procedure was followed: hydrazide **5** (0.54 g, 2.2 mmol, 1.8 equiv.), methyl 2-formylbenzoate (0.20 g, 1.2 mmol, 1 equiv.), HCl (10  $\mu$ L, 12M), ethanol (6 mL). Purification with flash column chromatography on silica gel (1:4 MeOH/EtOAc) afforded **1e** (0.37 g, 72%) as white solid.  $^1\text{H}$  NMR (500 MHz,  $\text{CDCl}_3$ ) indicated a 87:13 ratio of two geometrical isomers:  $\delta$  10.17 (s, 1H x 0.87 isomer A), 9.11 (s, 1H x 0.13 isomer B), 9.02 (s, 1H x 0.87 isomer A), 8.63 (s, 1H x isomer B), 8.24 (d,  $J = 7.9$  Hz, 1H x 0.87 isomer A), 8.01 (d,  $J = 7.5$  Hz, 1H x 0.13 isomer B), 7.97 (d,  $J = 7.9$  Hz, 1H x 0.87 isomer A; accidentally overlap with 1H x 0.13 isomer B), 7.54 (t,  $J = 7.2$  Hz, 1H), 7.44 (t,  $J = 7.8$  Hz, 1H), 7.31 (apparent d, 4H), 7.26 (m, 1H), 3.94 (s, 3H x 0.87 isomer A), 3.89 (s, 3H x 0.13 isomer B), 3.68 (s, 2H x 0.13 isomer B), 3.54 (s, 2H), 3.19 (s, 2H x isomer A), 2.58 (d, 8H).  $^{13}\text{C}$  NMR (126 MHz,  $\text{CDCl}_3$ ):  $\delta$  167.5, 166.8, 146.9, 138.1, 135.0, 132.8, 131.0, 130.8, 130.0, 129.5, 129.4, 129.0, 128.6, 128.6, 128.5, 128.4, 128.4, 127.4, 63.1, 61.4, 53.9, 53.2, 52.6. HRMS (ESI): 395.2037 (M+1); calcd for  $\text{C}_{22}\text{H}_{27}\text{N}_4\text{O}_3$ : 395.2083. IR (neat): 1716, 1664  $\text{cm}^{-1}$ . m.p.: 109.5-111  $^\circ\text{C}$ . Purity: 98% (LC-MS).

#### 2-(4-Benzylpiperazin-1-yl)-*N'*-(2-chlorobenzylidene)acetohydrazide (**1f**)

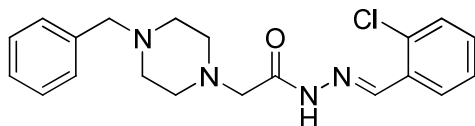

The general procedure was followed: hydrazide **5** (0.40 g, 1.6 mmol, 1.8 equiv.), 2-chlorobenzaldehyde (0.10 mL, 0.9 mmol, 1 equiv.), HCl (10  $\mu$ L, 12M), ethanol (5 mL). Purification with flash column chromatography on silica gel (1:4 MeOH/EtOAc) afforded **1f** (0.31 g, 94%) as yellow oil.  $^1\text{H}$  NMR (500 MHz,  $\text{CDCl}_3$ ) indicated a 78:12 ratio of two geometrical isomers:  $\delta$  10.61 (s, 1H x 0.12 isomer B), 10.40 (s, 1H x 0.78 isomer A), 8.53 (s, 1H x 0.78 isomer A), 8.23 (s, 1H x 0.12 isomer B), 8.09 (m, 1H x 0.78 isomer A), 7.88 (m, 1H x 0.12 conformer B), 7.27 (m, 5H), 7.21 (m, 3H), 3.65 (s, 2H x 0.12 conformer B), 3.49 (s, 2H), 3.17 (s, 2H x 0.78 conformer A), 2.58 (broad m, 8H).  $^{13}\text{C}$  NMR (126 MHz,  $\text{CDCl}_3$ ):  $\delta$  172.1, 166.9, 144.7, 140.6, 138.1, 134.4, 134.3, 131.7, 131.6, 131.3, 131.0, 130.1, 129.9, 129.5, 129.3, 128.5, 128.4, 128.1, 127.4, 127.3, 127.3, 127.2, 127.1, 63.2, 63.1, 61.3, 58.4, 53.9, 53.8, 53.1, 53.1. HRMS (ESI): 371.1624 (M+1); calcd for  $\text{C}_{20}\text{H}_{24}\text{N}_4\text{OCl}$ : 371.1639. IR (neat): 1682, 1595  $\text{cm}^{-1}$ . Purity: 98% (LC-MS).

**2-(4-Benzylpiperazin-1-yl)-N'-(2-mercaptobenzylidene)acetohydrazide (1g) and N',N''-(2,2'-disulfanediylobis(2,1-phenylene)bis(methan-1-yl-1-ylidene))bis(2-(4-benzylpiperazin-1-yl)acetohydrazide) (1i)**

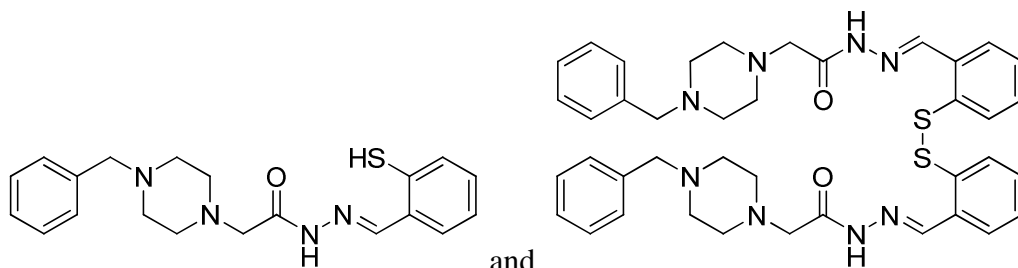

The general procedure was followed: hydrazide **5** (0.37 g, 1.5 mmol, 1.8 equiv.), 2-mercaptobenzaldehyde (0.11 g, 0.82 mmol, 1 equiv.), HCl (10  $\mu$ L, 12M), ethanol (14 mL). Purification with flash column chromatography on silica gel (1:4 MeOH/EtOAc) afforded **1g** (0.054 g, 18%) as yellow oil and **1i** (0.19 g, 63%) as yellow oil. In order to minimize the oxidation to form **1i** via disulfide bond, the product was dissolved in  $\text{CHCl}_3$  as a 100  $\mu$ M stock solution. **1g**:  $^1\text{H}$  NMR (400 MHz,  $\text{CDCl}_3$ ) indicated a 84:16 ratio of two geometrical isomers:  $\delta$  10.07 (s, 1H), 8.42 (s, 1H), 7.68 (dd,  $J = 1.7$  Hz,  $J = 7.4$  Hz, 1H), 7.26 (m, 7H), 7.14 (m, 1H), 5.23 (s, 1H x 0.84 isomer A), 4.85 (s, 1H x 0.16 isomer B), 3.67 (s, 2H x 0.16 isomer B), 3.51 (s, 2H x 0.84 isomer A), 3.17 (s, 2H x 0.16 isomer B), 3.15 (s, 2H x isomer A), 2.54 (broad d, 8H). **1i**:  $^1\text{H}$  NMR (500 MHz,  $\text{CDCl}_3$ ):  $\delta$  9.98 (s, 2H), 8.43 (s, 2H), 7.95 (m, 2H), 7.47 (m, 2H), 7.24 (m, 14H), 3.50 (s, 4H), 3.14 (s, 4H), 2.53 (broad d, 16H). HRMS (ESI): 735.3259 ( $\text{M}+1$ ); calcd for  $\text{C}_{40}\text{H}_{47}\text{N}_8\text{O}_2\text{S}_2$ : 735.3263. IR (neat): 1672  $\text{cm}^{-1}$ . Purity: 98% (HPLC).

**2-(4-Benzylpiperazin-1-yl)-N'-(3,5-diallyl-2-hydroxybenzylidene)acetohydrazide (1j)**

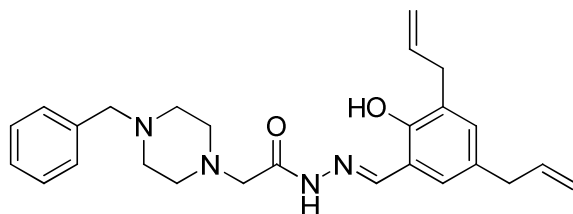

The general procedure was followed: hydrazide **5** (0.54 g, 2.2 mmol, 1.8 equiv.), **22** (0.24 g, 1.2 mmol, 1 equiv.), HCl (10  $\mu$ L, 12M), ethanol (6 mL). Purification with flash column chromatography on silica gel (1:4 MeOH/EtOAc) and then recrystallization with EtOAc afforded **1j** (0.48 g, 93%) as beige solid.  $^1\text{H}$  NMR (500 MHz,  $\text{CDCl}_3$ ):  $\delta$  11.08 (s, 1H), 10.00 (s, 1H), 8.40 (s, 1H), 7.33 (m, 4H), 7.28 (m, 1H), 7.01 (d,  $J = 1.9$  Hz,

1H), 6.90 (d,  $J = 1.9$  Hz, 1H), 6.03 (tdd,  $J = 6.6$  Hz,  $J = 10.0$  Hz,  $J = 16.7$  Hz, 1H), 5.93 (tdd,  $J = 6.7$  Hz,  $J = 9.5$  Hz,  $J = 16.2$  Hz, 1H), 5.07 (m, 4H), 3.55 (s, 2H), 3.43 (d,  $J = 6.6$  Hz, 2H), 3.30 (d,  $J = 6.7$  Hz, 2H), 3.18 (s, 2H), 2.58 (d, 8H).  $^{13}\text{C}$  NMR (126 MHz,  $\text{CDCl}_3$ ):  $\delta$  166.0, 155.0, 151.6, 145.3, 138.0, 137.8, 136.8, 133.0, 130.6, 129.4, 129.0, 128.5, 127.5, 116.9, 116.0, 115.8, 63.1, 61.2, 53.9, 53.2, 39.4, 34.1. HRMS (ESI): 433.2611 (M+1); calcd for  $\text{C}_{26}\text{H}_{33}\text{N}_4\text{O}_2$ : 433.2604. IR (neat): 3212 (br), 1737, 1680, 1616  $\text{cm}^{-1}$ . m.p.: 93-93.5  $^\circ\text{C}$ . Purity: 95% (LC-MS).

***N'*-(3-allyl-2-methoxybenzylidene)-2-(4-benzylpiperazin-1-yl)acetohydrazide (1k)**

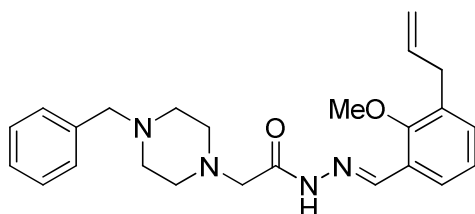

The general procedure was followed: hydrazide **5** (0.54 g, 2.2 mmol, 1.8 equiv.), **23** (0.21 g, 1.2 mmol, 1 equiv.), HCl (10  $\mu\text{L}$ , 12M), ethanol (6 mL). Purification with flash column chromatography on silica gel (1:4 MeOH/EtOAc) and then recrystallization with EtOAc afforded **1k** (0.41 g, 85%) as white solid.  $^1\text{H}$  NMR (500 MHz,  $\text{CDCl}_3$ ) indicated a 85:15 ratio of two geometrical isomers:  $\delta$  10.06 (s, 1H x 0.85 isomer A), 9.15 (s, 1H x 0.15 isomer B), 8.38 (s, 1H x 0.85 isomer A), 7.97 (s, 1H x 0.15 isomer B), 7.90 (dd,  $J = 1.6$  Hz,  $J = 7.8$  Hz, 1H x 0.85 isomer A), 7.68 (dd,  $J = 1.6$  Hz,  $J = 7.8$  Hz, 1H x 0.15 isomer B), 7.27 (s, 2H), 7.26 (s, 2H), 7.20 (m, 2H), 7.04 (t,  $J = 7.6$  Hz, 1H), 5.92 (tdd,  $J = 6.4$  Hz,  $J = 10.1$  Hz,  $J = 16.6$  Hz, 1H), 5.03 (m, 2H), 3.73 (s, 3H x 0.85 isomer A), 3.67 (s, 3H x 0.15 isomer B), 3.63 (s, 2H x 0.15 isomer B), 3.49 (s, 2H), 3.38 (d,  $J = 6.4$  Hz, 2H), 3.14 (s, 2H x 0.85 isomer B), 2.53 (d, 8H).  $^{13}\text{C}$  NMR (126 MHz,  $\text{CDCl}_3$ ):  $\delta$  166.6, 157.9, 144.6, 137.0, 133.4, 133.1, 132.8, 129.4, 128.5, 127.4, 127.0, 125.9, 125.0, 124.9, 124.8, 116.4, 63.3, 63.1, 61.3, 53.9, 53.2, 33.8. HRMS (ESI): 407.2443 (M+1); calcd for  $\text{C}_{24}\text{H}_{31}\text{N}_4\text{O}_2$ : 403.2447. IR (neat): 1662  $\text{cm}^{-1}$ . m.p.: 111.5-113  $^\circ\text{C}$ . Purity: 98% (LC-MS).

***N'*-(3-allyl-2-hydroxybenzylidene)-2-(4-(pyridin-2-ylmethyl)piperazin-1-yl)acetohydrazide (2a)**

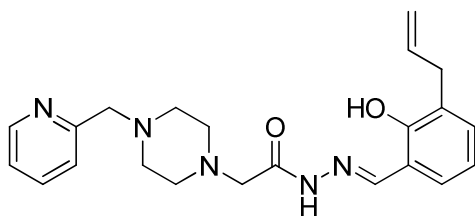

The general procedure was followed: **6** (0.54 g, 2.2 mmol, 1.8 equiv.), 3-allylsalicylaldehyde (0.19 g, 1.2 mmol, 1 equiv.), HCl (10  $\mu$ L, 12M), ethanol (6 mL). Purification with flash column chromatography on silica gel (1:4 MeOH/EtOAc) afforded **2a** (0.39 g, 83%) as light brown semi-solid.  $^1\text{H}$  NMR (500 MHz,  $\text{CDCl}_3$ ):  $\delta$  11.19 (s, 1H) 10.04 (s, 1H), 8.50 (d,  $J = 4.5$  Hz, 1H), 8.35 (s, 1H), 7.61 (dt,  $J = 1.7$  Hz,  $J = 7.7$  Hz, 1H), 7.36 (d,  $J = 7.8$  Hz, 1H), 7.12 (t,  $J = 7.2$  Hz, 2H), 7.02 (d,  $J = 6.5$  Hz, 1H), 6.78 (t,  $J = 7.6$  Hz, 1H), 5.96 (tdd,  $J = 6.6$  Hz,  $J = 10.0$  Hz,  $J = 16.8$  Hz, 1H), 5.00 (m, 2H), 3.67 (s, 2H), 3.38 (d,  $J = 6.6$  Hz, 2H), 3.15 (s, 1H), 2.60 (d, 8H).  $^{13}\text{C}$  NMR (126 MHz,  $\text{CDCl}_3$ ):  $\delta$  165.8, 163.8, 156.6, 151.5, 149.6, 136.8, 136.7, 132.5, 129.4, 128.4, 123.6, 122.6, 119.3, 117.1, 115.9, 64.5, 61.1, 53.7, 53.4, 34.1. HRMS (ESI): 394.2235 (M+1); calcd for  $\text{C}_{22}\text{H}_{28}\text{N}_5\text{O}_2$ : 394.2243. IR (neat): 3209 (br), 1690, 1605  $\text{cm}^{-1}$ . Purity: 96% (HPLC).

***N'*-(3-allyl-2-hydroxybenzylidene)-2-(4-(pyridin-3-ylmethyl)piperazin-1-yl) acetohydrazide (2b)**

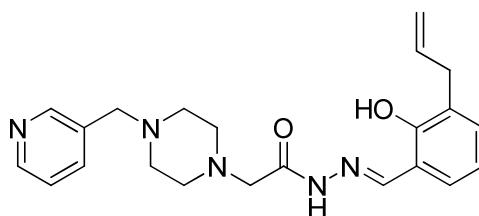

The general procedure was followed: **7** (0.10 g, 0.42 mmol, 1.8 equiv.), 3-allylsalicylaldehyde (0.038 g, 0.23 mmol, 1 equiv.), HCl (10  $\mu$ L, 12M), ethanol (1.4 mL). Purification with flash column chromatography on silica gel (1:4 MeOH/EtOAc) afforded **2b** (0.080 g, 88%) as light brown semi-solid.  $^1\text{H}$  NMR (500 MHz,  $\text{CDCl}_3$ ):  $\delta$  11.18 (s, 1H). 9.98 (s, 1H), 8.46 (m, 2H), 8.36 (s, 1H), 7.61 (d,  $J = 7.8$  Hz, 1H), 7.21 (m, 1H), 7.12 (d,  $J = 7.2$  Hz, 1H), 7.02 (d,  $J = 7.7$  Hz, 1H), 6.78 (t,  $J = 7.6$  Hz, 1H), 5.96 (tdd,  $J = 6.6$  Hz,  $J = 10.1$  Hz,  $J = 16.8$  Hz, 1H), 5.00 (m, 2H), 3.49 (s, 2H), 3.38 (d,  $J = 6.6$  Hz, 2H), 3.13 (s, 2H), 2.52 (d, 8H).  $^{13}\text{C}$  NMR (126 MHz,  $\text{CDCl}_3$ ):  $\delta$  165.9, 156.6, 151.6, 150.6, 149.1, 149.0, 136.9, 136.7, 132.5, 129.4, 128.4, 123.7, 119.3, 117.1, 115.9, 61.1, 60.2, 53.8, 53.2, 34.1. HRMS (ESI): 394.2237 (M+1); calcd for  $\text{C}_{22}\text{H}_{28}\text{N}_5\text{O}_2$ : 394.2243. IR (neat): 3199 (br), 1684, 1607  $\text{cm}^{-1}$ . Purity: 95% (HPLC).

***N'*-(3-allyl-2-hydroxybenzylidene)-2-(4-(pyridin-4-ylmethyl)piperazin-1-yl) acetohydrazide (2c)**

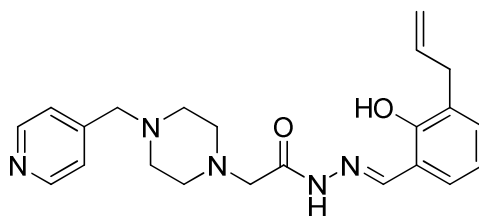

The general procedure was followed: **8** (0.075 g, 0.30 mmol, 1.8 equiv.), 3-allylsalicylaldehyde (0.027 g, 0.17 mmol, 1 equiv.), HCl (10  $\mu$ L, 12M), ethanol (1 mL). Purification with flash column chromatography on silica gel (1:4 MeOH/EtOAc) afforded **2c** (0.060 g, 90%) as light brown semi-solid.  $^1\text{H}$  NMR (500 MHz,  $\text{CDCl}_3$ ):  $\delta$  11.27 (s, 1H), 10.08 (s, 1H), 8.55 (d,  $J = 5.8$  Hz, 2H), 8.39 (s, 1H), 7.27 (s, 2H), 7.18 (dd,  $J = 1.5$  Hz,  $J = 7.4$  Hz, 1H), 7.06 (dd,  $J = 1.5$  Hz,  $J = 7.7$  Hz, 1H), 6.84 (t,  $J = 7.6$  Hz, 1H), 6.02 (tdd,  $J = 6.6$  Hz,  $J = 10.0$  Hz,  $J = 16.7$  Hz, 1H), 5.07 (m, 2H), 3.54 (s, 2H), 3.44 (d,  $J = 6.6$  Hz, 2H), 3.20 (s, 2H), 2.59 (d, 8H).  $^{13}\text{C}$  NMR (126 MHz,  $\text{CDCl}_3$ ):  $\delta$  166.0, 156.6, 151.5, 150.0, 147.5, 136.7, 132.5, 129.4, 128.4, 124.0, 119.3, 117.1, 115.9, 61.7, 61.2, 53.8, 53.3, 34.1. HRMS (ESI): 394.2238 (M+1); calcd for  $\text{C}_{22}\text{H}_{28}\text{N}_5\text{O}_2$ : 394.2243. IR (neat): 3189 (br), 1685, 1606  $\text{cm}^{-1}$ . Purity: 97% (HPLC).

***N'*-(3-allyl-2-hydroxybenzylidene)-2-(4-(2,5-dimethoxybenzyl)piperazin-1-yl) acetohydrazide (2e)**

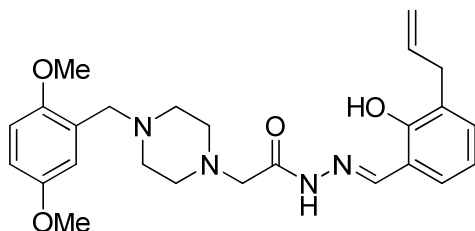

The general procedure was followed: **10** (0.67 g, 2.2 mmol, 1.8 equiv.), 3-allylsalicylaldehyde (0.19 g, 1.2 mmol, 1 equiv.), HCl (10  $\mu$ L, 12M), ethanol (6 mL). Purification with flash column chromatography on silica gel (1:4 MeOH/EtOAc) afforded **2e** (0.44 g, 80%) as beige solid.  $^1\text{H}$  NMR (500 MHz,  $\text{CDCl}_3$ ):  $\delta$  11.20 (s, 1H), 9.98 (s, 1H), 8.33 (s, 1H), 7.11 (dd,  $J = 1.5$  Hz,  $J = 7.4$  Hz, 1H), 7.01 (dd,  $J = 1.5$  Hz,  $J = 7.7$  Hz, 1H), 6.89 (d,  $J = 3.0$  Hz, 1H), 6.77 (t,  $J = 7.6$  Hz, 1H), 6.71 (m, 2H), 5.96 (tdd,  $J = 6.6$  Hz,  $J = 10.1$  Hz,  $J = 16.7$  Hz, 1H), 5.00 (m, 2H), 3.71 (s, 3H), 3.70 (s, 3H), 3.52 (s, 2H), 3.38 (d,  $J = 6.6$  Hz, 2H), 3.11 (s, 2H), 2.54 (d, 8H).  $^{13}\text{C}$  NMR (126 MHz,  $\text{CDCl}_3$ ):  $\delta$  164.9, 155.4, 152.5, 151.1, 150.3, 135.5, 131.3, 128.2, 127.2, 126.0, 118.0, 115.9, 115.5, 114.6, 111.3, 110.7, 60.0, 55.2, 54.8, 54.7, 52.7, 51.9, 32.8. HRMS (ESI): 453.2507 (M+1); calcd for  $\text{C}_{25}\text{H}_{33}\text{N}_4\text{O}_4$ : 453.2502. IR (neat): 3215 (br), 1694, 1608  $\text{cm}^{-1}$ . m.p.: 101.2-103  $^\circ\text{C}$ . Purity: 95% (LC-MS).

***N'*-(3-allyl-2-hydroxybenzylidene)-2-(4-(4-methoxybenzyl)piperazin-1-yl)acetohydrazide (2f)**

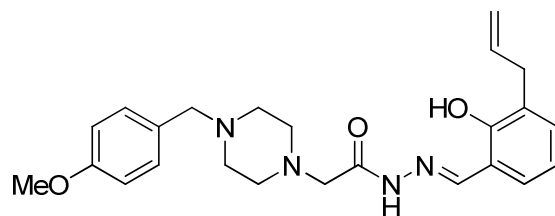

The general procedure was followed: **11** (0.60 g, 2.2 mmol, 1.8 equiv.), 3-allylsalicylaldehyde (0.19 g, 1.2 mmol, 1 equiv.), HCl (10  $\mu$ L, 12M), ethanol (6 mL). Purification with flash column chromatography on silica gel (1:4 MeOH/EtOAc) afforded **2f** (0.41 g, 81%) as light yellow solid.  $^1\text{H}$  NMR (500 MHz,  $\text{CDCl}_3$ ):  $\delta$  11.19 (s, 1H), 9.97 (s, 1H), 8.35 (s, 1H), 7.16 (d,  $J = 8.3$  Hz, 2H), 7.12 (d,  $J = 7.4$  Hz, 1H), 7.02 (d,  $J = 7.6$  Hz, 1H), 6.78 (m, 3H), 5.96 (m, 1H), 4.99 (m, 2H), 3.73 (s, 3H), 3.43 (s, 2H), 3.38 (d,  $J = 6.6$  Hz, 2H), 3.11 (s, 2H), 2.50 (d, 8H).  $^{13}\text{C}$  NMR (126 MHz,  $\text{CDCl}_3$ ):  $\delta$  164.8, 157.9, 155.4, 150.4, 135.5, 131.3, 129.4, 128.5, 128.2, 127.2, 118.1, 115.9, 114.7, 112.7, 61.2, 59.9, 54.3, 52.6, 51.8, 32.8. HRMS (ESI): 423.2383 ( $\text{M}+1$ ); calcd for  $\text{C}_{22}\text{H}_{28}\text{N}_5\text{O}_2$ : 423.2396. IR (neat): 3211 (br), 1686, 1609  $\text{cm}^{-1}$ . Purity: 99% (LC-MS).

***N'*-(3-allyl-2-hydroxybenzylidene)-2-(4-(3-nitrobenzyl)piperazin-1-yl) acetohydrazide (2g)**

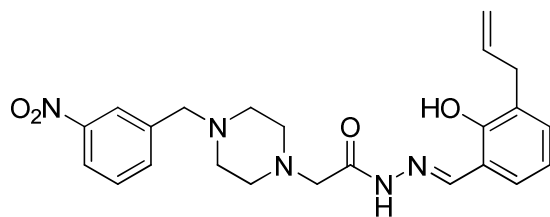

The general procedure was followed: **12** (0.63 g, 2.2 mmol, 1.8 equiv.), 3-allylsalicylaldehyde (0.19 g, 1.2 mmol, 1 equiv.), HCl (10  $\mu$ L, 12M), ethanol (6 mL). Purification with flash column chromatography on silica gel (1:4 MeOH/EtOAc) afforded **2g** (0.39 g, 74%) as beige solid.  $^1\text{H}$  NMR (500 MHz,  $\text{CDCl}_3$ ):  $\delta$  11.18 (s, 1H), 9.95 (s, 1H), 8.34 (s, 1H), 8.12 (s, 1H), 8.05 (d,  $J = 6.6$  Hz, 1H), 7.61 (d,  $J = 7.6$  Hz, 1H), 7.43 (t,  $J = 7.9$  Hz, 1H), 7.11 (d,  $J = 7.3$  Hz, 1H), 7.01 (dd,  $J = 1.4$  Hz,  $J = 7.7$  Hz, 1H), 6.77 (t,  $J = 7.6$  Hz, 1H), 5.95 (tdd,  $J = 6.6$  Hz,  $J = 10.1$  Hz,  $J = 16.8$  Hz, 1H), 4.99 (m, 2H), 3.56 (s, 2H), 3.37 (d,  $J = 6.6$  Hz, 2H), 3.13 (s, 2H), 2.53 (d, 8H).  $^{13}\text{C}$  NMR (126 MHz,  $\text{CDCl}_3$ ):  $\delta$  165.9, 156.7, 151.8, 148.6, 140.6, 136.7, 135.2, 132.6, 129.5, 129.4, 128.5, 123.9, 122.6, 119.3, 117.1, 115.9, 62.1, 61.2, 53.8, 53.3, 34.1. HRMS (ESI): 438.2142 ( $\text{M}+1$ ); calcd for  $\text{C}_{23}\text{H}_{28}\text{N}_5\text{O}_4$ : 438.2141. IR (neat): 3218 (br), 1682, 1526, 1349  $\text{cm}^{-1}$ . m.p.: 84-86  $^\circ\text{C}$ . Purity: 96% (HPLC).



### 2-(4-(2,5-Dimethoxybenzyl)piperazin-1-yl)-N'-(2-hydroxybenzylidene) acetohydrazide (**3**)

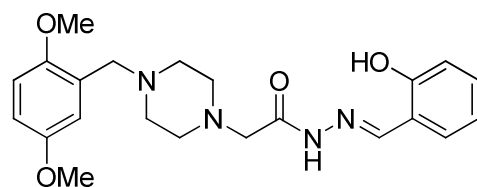

The general procedure was followed: **10** (0.67 g, 2.2 mmol, 1.8 equiv.), salicylaldehyde (0.13 g, 1.2 mmol, 1 equiv.), HCl (10  $\mu$ L, 12M), ethanol (6 mL). Purification with flash column chromatography on silica gel (1:4 MeOH/EtOAc) afforded **3** (0.41 g, 82%) as light yellow semi-solid.  $^1\text{H}$  NMR (500 MHz,  $\text{CDCl}_3$ ):  $\delta$  10.98 (s, 1H), 10.05 (s, 1H), 8.46 (s, 1H), 7.30 (m, 1H), 7.21 (dd,  $J = 1.6$  Hz,  $J = 7.7$  Hz, 1H), 7.00 (m, 1H), 6.96 (d,  $J = 3.0$  Hz, 1H), 6.90 (dt,  $J = 1.0$  Hz,  $J = 7.5$  Hz, 1H), 6.78 (m, 2H), 3.78 (s, 3H), 3.78 (s, 3H), 3.59 (s, 2H), 3.18 (s, 2H), 2.62 (d, 8H).  $^{13}\text{C}$  NMR (126 MHz,  $\text{CDCl}_3$ ):  $\delta$  166.2, 158.8, 153.7, 152.3, 151.5, 132.1, 131.2, 127.2, 119.5, 117.6, 117.5, 116.8, 112.5, 111.8, 61.2, 56.4, 56.0, 55.9, 54.0, 53.2. HRMS (ESI): 413.2182 (M+1); calcd for  $\text{C}_{22}\text{H}_{29}\text{N}_4\text{O}_4$ : 413.2189. IR (neat): 3214 (br), 1684, 1621  $\text{cm}^{-1}$ . Purity: 98% (LC-MS).

### 3,5-Diallylsalicylaldehyde (**22**)

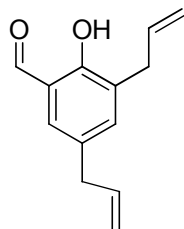

To a stirred mixture of 3-allylsalicylaldehyde (0.097 g, 0.60 mmol, 1 equiv.) and  $\text{K}_2\text{CO}_3$  (0.10 g, 0.74 mmol, 1.25 equiv.) in DMF (5 mL) was added allyl bromide (0.077 mL, 0.89 mmol, 1.5 equiv.). The reaction mixture was stirred for 3 hr at room temperature. The solution was filtered, washed with DMF (3 mL) and then concentrated under high vacuum. The residue (neat) was microwaved at 100 W for 5 min. The crude product was purified by normal phase Prep TLC (1:4  $\text{CH}_2\text{Cl}_2$ /Hexanes) to provide **22** (0.048 g, 40%) as yellow liquid.  $^1\text{H}$  NMR (500 MHz,  $\text{CDCl}_3$ ):  $\delta$  11.17 (s, 1H), 9.85 (s, 1H), 7.23 (apparent dd,  $J = 2.1$  Hz,  $J = 4.1$  Hz, 2H), 5.97 (m, 2H), 5.10 (m, 2H), 5.07 (m, 2H), 3.41 (d,  $J = 6.6$  Hz, 2H), 3.35 (d,  $J = 6.6$  Hz, 2H).  $^{13}\text{C}$  NMR (126 MHz,  $\text{CDCl}_3$ ):  $\delta$  196.9, 158.2, 138.0, 137.2, 136.1, 131.5, 131.3, 129.0, 120.3, 116.6, 116.4, 39.2, 33.4. HRMS (ESI): 203.1066 (M+1); calcd for  $\text{C}_{13}\text{H}_{15}\text{O}_2$ : 203.1072. IR (neat): 2847, 1701  $\text{cm}^{-1}$ .

### 3-Allyl-2-methoxybenzaldehyde (**23**)

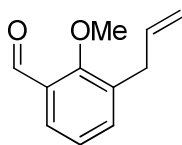

To a stirred mixture of 3-allylsalicylaldehyde (0.11 g, 0.68 mmol, 1 equiv.) and  $K_2CO_3$  (0.28 g, 2.0 mmol, 3 equiv.) in acetone was added iodomethane (0.050 mL, 0.80 mmol, 1.2 equiv.). The reaction mixture was stirred for 15 hr. The solution was filtered, washed with acetone and then concentrated *in vacuo*. The crude product was purified by flash column chromatography on silica gel (1:9 EtOAc/Hexanes) to afford **23** (0.073 g, 75 %) as light yellow liquid.  $^1H$  NMR (500 MHz,  $CDCl_3$ ):  $\delta$  10.37 (s, 1H), 7.72 (dd,  $J = 1.6$  Hz,  $J = 7.7$  Hz, 1H), 7.47 (dd,  $J = 1.5$  Hz,  $J = 7.5$  Hz, 1H), 7.19 (t,  $J = 7.6$  Hz, 1H), 5.98 (tdd,  $J = 6.4$  Hz,  $J = 10.1$  Hz,  $J = 16.6$  Hz, 1H), 5.11 (m, 2H), 3.89 (s, 3H), 3.47 (d,  $J = 6.4$  Hz, 2H).  $^{13}C$  NMR (126 MHz,  $CDCl_3$ ):  $\delta$  190.3, 161.6, 137.1, 136.6, 134.5, 129.6, 127.5, 124.8, 116.8, 64.5, 33.4. HRMS (ESI): 177.0919 (M+1); calcd for  $C_{11}H_{13}O_2$ : 177.0916

### *N'*-(3-allyl-2-hydroxybenzyl)-2-(4-benzylpiperazin-1-yl)acetohydrazide (**4d**)

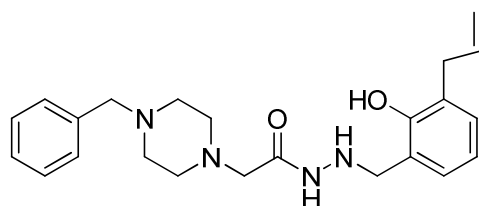

To a solution of **PAC-1** (**1**) (0.10 g, 0.25 mmol, 1 equiv.) in 3:1 THF/AcOH (8 mL in total) was added sodium cyanoborohydride (0.048 g, 0.76 mmol, 3 equiv.) at 0 °C. The reaction mixture was allowed to warm slowly to room temperature and stirred for 20 hr. The reaction mixture was then poured into a slurry of ice and concentrated hydrochloric acid (1 mL). The resulting mixture was extracted with  $CH_2Cl_2$  (2 x 10 mL) and EtOAc (2 x 10 mL). The combined organic layer was washed with saturated sodium bicarbonate, dried over  $Na_2SO_4$  and concentrated *in vacuo*. The crude product was purified by flash column chromatography on silica gel (1:4 MeOH/EtOAc) to afford **4d** (0.069 g, 67%) as white solid.  $^1H$  NMR (400 MHz,  $CDCl_3$ ):  $\delta$  9.26 (s, 1H), 8.42 (d,  $J = 4.8$  Hz, 1H), 7.30 (m, 5H), 7.09 (dd,  $J = 1.2$  Hz,  $J = 7.4$  Hz, 1H), 6.87 (dd,  $J = 1.3$  Hz,  $J = 7.4$  Hz, 1H), 6.74 (t,  $J = 7.5$  Hz, 1H), 6.05 (tdd,  $J = 6.6$  Hz,  $J = 10.1$  Hz,  $J = 16.7$  Hz, 1H), 5.09 (m, 2H), 4.95 (s, 1H), 4.18 (s, 2H), 3.45 (s, 2H), 3.44 (s, 2H), 3.04 (s, 2H), 2.36 (d, 8H).  $^{13}C$  NMR (101 MHz,  $CDCl_3$ ):  $\delta$  170.1, 154.9, 137.3, 130.2, 129.4, 129.3, 128.5, 128.2, 127.8, 127.4, 120.5, 119.8, 115.6, 63.0, 60.7, 54.6, 53.7, 53.1,

34.3. HRMS (ESI): 395.2428 (M+1); calcd for C<sub>23</sub>H<sub>31</sub>N<sub>4</sub>O<sub>2</sub>: 395.2447. IR (neat): 3268 (br), 1676 cm<sup>-1</sup>. m.p.: 83-84 °C. Purity: 98% (HPLC).

### Scheme S2. Synthesis of **4c**

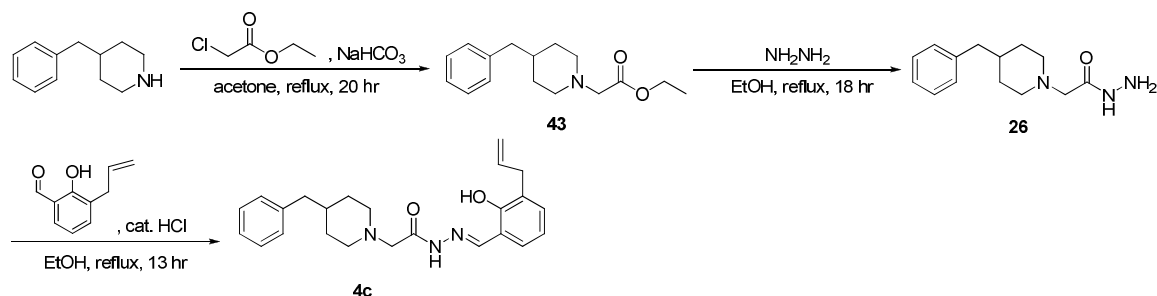

### Ethyl 2-(4-benzylpiperidin-1-yl)acetate (**43**)

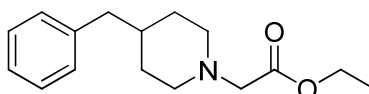

To a stirred mixture of 1-benzylpiperidine (0.30 mL, 1.7 mmol, 1 equiv.) and NaHCO<sub>3</sub> (0.18 g, 2.1 mmol, 1.25 equiv.) in acetone (3.5 mL) was added ethyl chloroacetate (0.20 mL, 1.9 mmol, 1.1 equiv.). The reaction was refluxed for 20 hr monitoring by TLC. The solution was filtered and the solid was washed with acetone (10 mL). The filtrate was concentrated *in vacuo*, and then purified by flash column chromatography on silica gel (1:1 EtOAc/Hexanes) to give **43** (0.36 g, 82%) as yellow liquid. <sup>1</sup>H NMR (500 MHz, CDCl<sub>3</sub>): δ 7.28 (m, 2H), 7.18 (m, 1H), 7.15 (m, 2H), 4.18 (q, *J* = 7.1 Hz, 2H), 3.18 (s, 2H), 2.92 (d, *J* = 11.4 Hz, 2H), 2.54 (d, *J* = 7.0 Hz, 2H), 2.10 (dt, *J* = 2.1 Hz, *J* = 11.7 Hz, 2H), 1.63 (dd, *J* = 1.4 Hz, *J* = 13.4 Hz, 2H), 1.53 (m, 1H), 1.40 (ddd, *J* = 3.7 Hz, *J* = 12.2 Hz, *J* = 24.1 Hz, 2H), 1.27 (t, *J* = 7.1 Hz, 3H). <sup>13</sup>C NMR (126 MHz, CDCl<sub>3</sub>): δ 170.5, 140.7, 129.3, 128.4, 126.0, 60.8, 59.9, 53.8, 43.3, 37.6, 32.0, 14.5. HRMS (ESI): 262.1819 (M+1); calcd for C<sub>16</sub>H<sub>24</sub>NO<sub>2</sub>: 262.1807. IR (neat): 1741, 1655 cm<sup>-1</sup>.

### 2-(4-Benzylpiperidin-1-yl)acetohydrazide (**26**)

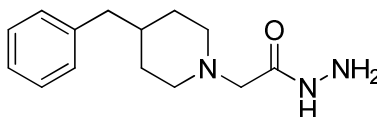

To a stirred solution of **43** (0.29 g, 1.1 mmol, 1 equiv.) in ethanol (2.3 mL, 0.5 M) was added anhydrous hydrazine (0.11 mL, 3.4 mmol, 3 equiv.). The reaction was refluxed for 18 hr monitoring by TLC. The

reaction mixture was concentrated *in vacuo*. The residue was dissolved in CH<sub>2</sub>Cl<sub>2</sub> and washed with water (10 mL) and brine (10 mL). The aqueous layer was extracted with CH<sub>2</sub>Cl<sub>2</sub> (3 x 10 mL) and EtOAc (10 mL). The combined organic layer was dried over Na<sub>2</sub>SO<sub>4</sub>, filtered and concentrated *in vacuo*. The crude product was purified by flash column chromatography on silica gel (1:4 MeOH/EtOAc) to afford **26** (0.18 g, 66%) as milky oil. <sup>1</sup>H NMR (500 MHz, CDCl<sub>3</sub>): δ 8.20 (s, 1H), 7.27 (m, 2H), 7.18 (m, 1H), 7.12 (m, 2H), 3.82 (broad s, 2H), 3.01 (s, 2H), 2.77 (d, *J* = 11.6 Hz, 2H), 2.52 (d, *J* = 7.1 Hz, 2H), 2.07 (dt, *J* = 2.4 Hz, *J* = 11.9 Hz, 2H), 1.62 (d, *J* = 13.1 Hz, 2H), 1.50 (m, 1H), 1.26 (ddd, *J* = 3.8 Hz, *J* = 12.4 Hz, *J* = 15.6 Hz, 2H). <sup>13</sup>C NMR (126 MHz, CDCl<sub>3</sub>): δ 171.2, 140.6, 129.3, 128.4, 126.1, 61.2, 54.7, 43.3, 37.4, 32.6. HRMS (ESI): 248.1755 (M+1); calcd for C<sub>14</sub>H<sub>22</sub>N<sub>3</sub>O: 248.1763. IR (neat): 3322, 1667 cm<sup>-1</sup>.

***N'*-(3-allyl-2-hydroxybenzylidene)-2-(4-benzylpiperidin-1-yl)acetohydrazide (4c)**

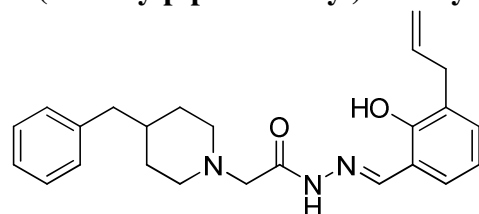

To a stirred solution of 3-allylsalicylaldehyde (0.063 g, 0.39 mmol, 1 equiv.) in ethanol (2.2 mL), **26** (0.17 g, 0.70 mmol, 1.8 equiv.) and HCl (10 mol%) were added. The reaction was refluxed for 13 hr monitoring by TLC. The solution was concentrated *in vacuo*, and then purified by flash column chromatography on silica gel (1:4 MeOH/EtOAc) to provide **4c** (0.12 g, 80%) as white solid. <sup>1</sup>H NMR (500 MHz, CDCl<sub>3</sub>): δ 11.28 (s, 1H), 10.26 (s, 1H), 8.43 (s, 1H), 7.30 (t, *J* = 7.5 Hz, 2H), 7.21 (dd, *J* = 7.1 Hz, *J* = 14.2 Hz, 2H), 7.15 (d, *J* = 7.3 Hz, 2H), 7.11 (d, *J* = 7.7 Hz, 1H), 6.86 (t, *J* = 7.6 Hz, 1H), 6.04 (tdd, *J* = 6.6 Hz, *J* = 10.1 Hz, *J* = 16.8 Hz, 1H), 5.09 (m, 2H), 3.46 (d, *J* = 6.6 Hz, 2H), 3.21 (s, 2H), 2.93 (d, *J* = 10.4 Hz, 2H), 2.58 (d, *J* = 7.1 Hz, 2H), 2.26 (t, *J* = 10.1 Hz, 2H), 1.72 (d, *J* = 13.0 Hz, 2H), 1.60 (m, 1H), 1.38 (dd, *J* = 11.1 Hz, *J* = 22.1 Hz, 2H). <sup>13</sup>C NMR (126 MHz, CDCl<sub>3</sub>): δ 166.2, 156.7, 151.5, 140.4, 136.8, 132.5, 129.4, 129.3, 128.5, 128.5, 126.3, 119.3, 117.2, 115.9, 61.5, 54.7, 43.2, 37.3, 34.1, 32.4. HRMS (ESI): 392.2321 (M+1); calcd for C<sub>24</sub>H<sub>30</sub>N<sub>3</sub>O<sub>2</sub>: 392.2338. IR (neat): 3208 (br), 1678, 1608 cm<sup>-1</sup>. m.p.: 140.8-141.3 °C. Purity: 96% (HPLC).

### Scheme S3. Syntheses of 4a-b

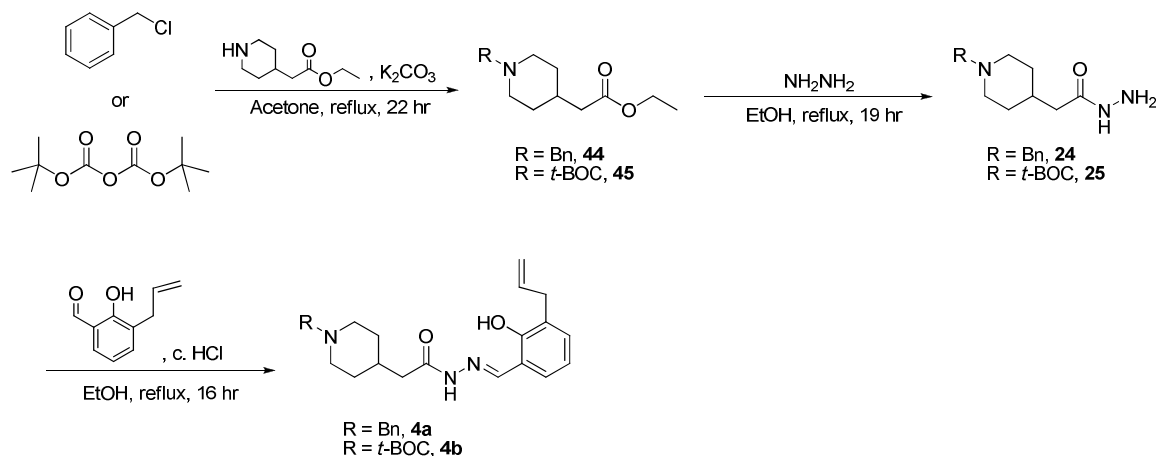

### Ethyl 2-(1-benzylpiperidin-4-yl)acetate (**44**)

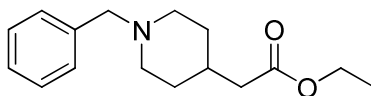

To a stirred mixture of benzyl chloride (0.3 mL, 2.6 mmol, 1 equiv.) and  $K_2CO_3$  (1.1 g, 7.8 mmol, 3 equiv.) in acetone (11 mL) was added 2-(piperidin-4-yl)acetic acid ethyl ester (0.54 g, 3.1 mmol, 1.2 equiv.). The reaction was refluxed for 22 hr monitoring by TLC. The solution was filtered and the solid was washed with ethanol (10 mL). The filtrate was concentrated *in vacuo*, and then purified by flash column chromatography on silica gel (1:1 EtOAc/Hexanes) to give **44** (0.60 g, 88%) as clear liquid.  $^1H$  NMR (500 MHz,  $CDCl_3$ ):  $\delta$  7.28 (apparent d,  $J = 4.4$  Hz, 4H), 7.22 (m, 1H), 4.09 (q,  $J = 7.1$  Hz, 2H), 3.46 (s, 2H), 2.83 (d,  $J = 11.7$  Hz, 2H), 2.19 (d,  $J = 7.1$  Hz, 2H), 1.95 (dt,  $J = 2.2$  Hz,  $J = 11.8$  Hz, 2H), 1.75 (m, 1H), 1.65 (d,  $J = 12.9$  Hz, 2H), 1.30 (dt,  $J = 3.6$  Hz,  $J = 12.3$  Hz, 2H), 1.21 (t,  $J = 5.8$  Hz, 3H).  $^{13}C$  NMR (126 MHz,  $CDCl_3$ ):  $\delta$  173.0, 138.7, 129.4, 128.3, 127.1, 63.6, 60.4, 53.7, 41.5, 33.2, 32.3, 14.5. HRMS (ESI): 262.1812 (M+1); calcd for  $C_{16}H_{24}NO_2$ : 262.1807. IR (neat):  $1736\text{ cm}^{-1}$ .

### 2-(1-Benzylpiperidin-4-yl)acetohydrazide (**24**)

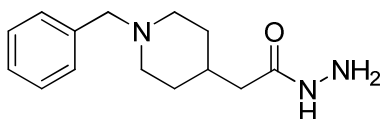

To a stirred solution of **44** (0.58 g, 2.2 mmol, 1 equiv.) in ethanol (4.4 mL, 0.5 M) was added anhydrous hydrazine (0.21 mL, 6.6 mmol, 3 equiv.). The reaction was refluxed for 19 hr monitoring by TLC. The reaction mixture was concentrated *in vacuo*. The residue was dissolved in  $CH_2Cl_2$  and washed with water (10

mL) and brine (10 mL). The aqueous layer was extracted with CH<sub>2</sub>Cl<sub>2</sub> (3 x 10 mL) and EtOAc (10 mL). The combined organic layer was dried over Na<sub>2</sub>SO<sub>4</sub>, filtered and concentrated *in vacuo*. The crude product was purified by flash column chromatography on silica gel (1:4 MeOH/EtOAc) to afford **24** (0.39 g, 72%) as milky oil. <sup>1</sup>H NMR (400 MHz, CDCl<sub>3</sub>): δ 7.29 (m, 3H), 7.24 (m, 2H), 7.15 (broad s, 1H), 3.82 (broad s, 2H), 3.47 (s, 2H), 2.86 (d, *J* = 11.7 Hz, 2H), 2.04 (d, *J* = 7.1 Hz, 2H), 1.96 (m, 2H), 1.83 (m, 1H), 1.65 (d, *J* = 12.8 Hz, 2H), 1.28 (ddd, *J* = 3.8 Hz, *J* = 12.1 Hz, *J* = 24.8 Hz, 2H). <sup>13</sup>C NMR (126 MHz, CDCl<sub>3</sub>): δ 172.7, 136.9, 129.7, 128.1, 127.4, 63.0, 53.3, 40.6, 33.2, 31.3. HRMS (ESI): 248.1767 (M+1); calcd for C<sub>22</sub>H<sub>28</sub>N<sub>5</sub>O<sub>2</sub>: 248.1763. IR (neat): 1738 cm<sup>-1</sup>.

***N'*-(3-allyl-2-hydroxybenzylidene)-2-(1-benzylpiperidin-4-yl)acetohydrazide (4a)**

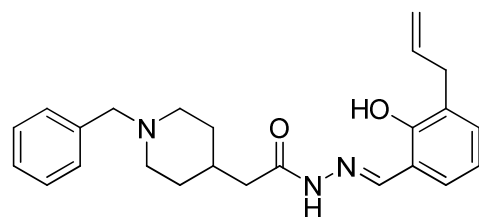

To a stirred solution of 3-allylsalicylaldehyde (0.093 g, 0.57 mmol, 1 equiv.) in ethanol (3.3 mL), **24** (0.25 g, 1.0 mmol, 1.8 equiv.) and HCl (10 mol%) were added. The reaction was refluxed for 16 hr monitoring by TLC. The solution was concentrated *in vacuo*, and then purified by flash column chromatography on silica gel (1:4 MeOH/EtOAc) to provide **4a** (0.16 g, 71%) as white solid. <sup>1</sup>H NMR (500 MHz, CDCl<sub>3</sub>) indicated a 81:19 ratio of two conformers: δ 11.25 (s, 1H x 0.19 conformer B), 10.47 (s, 1H x 0.81 conformer A), 10.43 (s, 1H x 0.81 conformer A), 9.07 (s, 1H x 0.19 conformer B), 8.29 (s, 1H x 0.19 conformer B), 7.97 (s, 1H x conformer A), 7.31 (apparent d, *J* = 4.6 Hz, 4H), 7.24 (m, 1H), 7.20 (d, *J* = 7.5 Hz, 1H x 0.81 conformer A), 7.16 (d, *J* = 7.4 Hz, 1H x 0.19 conformer B), 7.12 (dd, *J* = 1.4 Hz, *J* = 7.7 Hz, 1H x 0.81 conformer A), 7.04 (dd, *J* = 1.2 Hz, *J* = 7.7 Hz, 1H x 0.19 conformer B), 6.89 (t, *J* = 7.6 Hz, 1H x 0.81 conformer A), 6.82 (t, *J* = 7.6 Hz, 1H x 0.19 conformer B), 6.02 (m, 1H), 5.11 (m, 2H x conformer A), 5.04 (m, 2H x conformer B), 3.49 (s, 2H), 3.46 (d, *J* = 6.5 Hz, 2H x 0.81 conformer A), 3.42 (d, *J* = 6.6 Hz, 2H x 0.19 conformer B), 2.89 (d, *J* = 11.6 Hz, 2H), 2.60 (d, *J* = 6.9 Hz, 2H x 0.81 conformer A), 2.19 (d, *J* = 7.1 Hz, 2H x 0.19 conformer B), 2.01 (t, *J* = 11.6 Hz, 2H), 1.94 (m, 1H), 1.78 (d, *J* = 12.5 Hz, 2H x 0.81 conformer A), 1.74 (d, *J* = 12.7 Hz, 2H x 0.19 conformer B), 1.43 (m, 2H x 0.81 conformer A), 1.31 (m, 2H x 0.19 conformer B). <sup>13</sup>C NMR (126 MHz, CDCl<sub>3</sub>): δ 193.1, 174.7, 155.7, 147.9, 138.6, 136.6, 132.5, 129.6, 129.6, 129.5, 128.5, 128.4, 128.1, 127.2, 119.8, 117.1, 116.1, 63.6, 53.8, 39.6, 33.8, 32.9, 32.5. HRMS (ESI): 392.2338 (M+1); calcd for C<sub>24</sub>H<sub>30</sub>N<sub>3</sub>O<sub>2</sub>: 392.2338. IR (neat): 3204 (br), 1660, 1605 cm<sup>-1</sup>. m.p.: 109.5-110.3. Purity: 97% (HPLC).

**Tert-butyl 4-(2-hydrazinyl-2-oxoethyl)piperidine-1-carboxylate (25)**

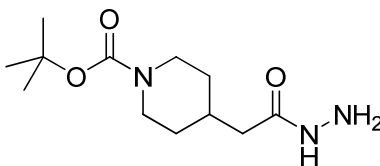

To a stirred solution of **45** (0.31 g, 1.1 mmol, 1 equiv.) in ethanol (2.3 mL, 0.5 M) was added anhydrous hydrazine (0.11 mL, 3.4 mmol, 3 equiv.). The reaction was refluxed for 19 hr monitoring by TLC. The reaction mixture was concentrated *in vacuo*. The residue was dissolved in CH<sub>2</sub>Cl<sub>2</sub> and washed with water (10 mL) and brine (10 mL). The aqueous layer was extracted with CH<sub>2</sub>Cl<sub>2</sub> (3 x 10 mL) and EtOAc (10 mL). The combined organic layer was dried over Na<sub>2</sub>SO<sub>4</sub>, filtered and concentrated *in vacuo*. The crude product was purified by flash column chromatography on silica gel (1:4 MeOH/EtOAc) to afford **25** (0.18 g, 62%) as clear oil. <sup>1</sup>H NMR (500 MHz, CDCl<sub>3</sub>): δ 4.05 (d, *J* = 12.2 Hz, 2H), 2.76 (s, 2H), 2.09 (d, *J* = 7.2 Hz, 1H), 1.95 (m, 2H), 1.68 (d, *J* = 13.3 Hz, 2H), 1.45 (s, 9H), 1.13 (m, 2H). <sup>13</sup>C NMR (126 MHz, CDCl<sub>3</sub>): δ 155.3, 79.8, 40.9, 40.5, 33.6, 31.7, 27.5, 17.2. HRMS (ESI): 258.1698 (M+1); calcd for C<sub>11</sub>H<sub>22</sub>N<sub>4</sub>O<sub>3</sub>: 258.1690. IR (neat): 3301, 1670 cm<sup>-1</sup>.

**Tert-butyl 4-(2-(2-(3-allyl-2-hydroxybenzylidene)hydrazinyl)-2-oxoethyl)piperidine-1-carboxylate (4b)**

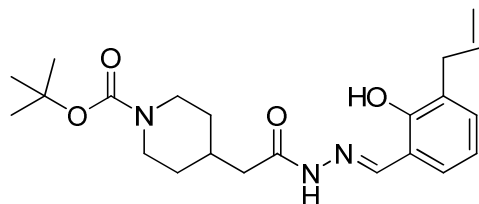

To a stirred solution of 3-allylsalicylaldehyde (0.056 g, 0.35 mmol, 1 equiv.) in ethanol (2.0 mL), **25** (0.16 g, 0.62 mmol, 1.8 equiv.) and HCl (10 mol%) were added. The reaction was refluxed for 16 hr monitoring by TLC. The solution was concentrated *in vacuo*, and then purified by flash column chromatography on silica gel (1:4 MeOH/EtOAc) to provide **4b** (0.14 g, 71%) as beige solid. <sup>1</sup>H NMR (500 MHz, CDCl<sub>3</sub>) indicated a 76:24 ratio of two conformers: δ 11.43 (s, 1H x 0.24 conformer B), 10.80 (s, 1H x 0.76 conformer A), 10.49 (s, 1H x 0.76 conformer A), 10.10 (s, 1H x 0.24 conformer B), 8.29 (s, 1H x 0.24 conformer B), 8.04 (s, 1H x 0.76 conformer A), 7.19 (d, *J* = 7.4 Hz, 1H x 0.76 conformer A), 7.13 (m, 1H), 7.02 (d, *J* = 7.7 Hz, 1H x 0.24 conformer B), 6.88 (t, *J* = 7.6 Hz, 1H x 0.76 conformer A), 6.80 (t, *J* = 7.6 Hz, 1H x 0.24 conformer B), 6.01 (m, 1H), 5.08 (m, 2H x 0.76 conformer A), 5.02 (m, 2H x 0.24 conformer B), 4.10 (s, 2H), 3.45 (d, *J* = 6.5 Hz, 2H x 0.76 conformer A), 3.40 (d, *J* = 6.6 Hz, 2H x 0.24 conformer B), 2.74 (s, 2H), 2.60 (d, *J* = 6.9 Hz, 2H x 0.76 conformer A), 2.21 (d, *J* = 7.1 Hz, 2H x 0.24 conformer B), 2.09 (m, 1H), 1.79 (d, *J* = 12.2 Hz, 2H x 0.76 conformer A), 1.45 (s, 9H).

conformer A), 1.74 (d,  $J = 13.0$  Hz, 2H x 0.24 conformer B), 1.45 (s, 9H x 0.76 conformer A), 1.44 (s, 9H x 0.24 conformer B), 1.27 (dq,  $J = 4.3$  Hz,  $J = 12.6$  Hz, 2H x 0.76 conformer A), 1.13 (dq,  $J = 4.0$  Hz,  $J = 12.4$  Hz, 2H x 0.24 conformer B).  $^{13}\text{C}$  NMR (126 MHz,  $\text{CDCl}_3$ ):  $\delta$  174.3, 168.1, 156.6, 155.7, 155.1, 150.6, 148.3, 136.7, 136.5, 132.6, 132.4, 129.7, 129.3, 128.4, 128.1, 119.8, 119.2, 117.2, 116.1, 115.9, 79.9, 79.7, 39.5, 33.8, 32.9, 32.3, 28.7. HRMS (ESI): 402.2409 (M+1); calcd for  $\text{C}_{22}\text{H}_{32}\text{N}_3\text{O}_4$ : 402.2393. IR (neat): 3216 (br), 1688, 1663, 1608  $\text{cm}^{-1}$ . m.p.: 76-78  $^\circ\text{C}$ . Purity: 95% (HPLC).

#### Scheme S4. Syntheses of **4f** – **g**

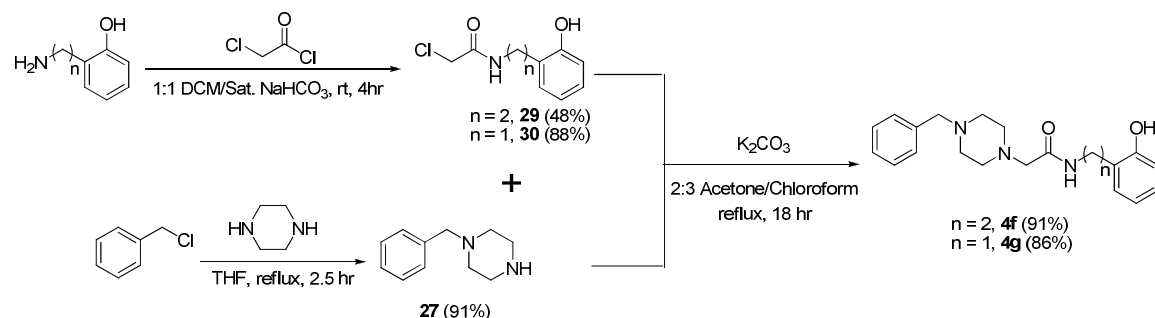

#### General Procedure for haloacetamides **29** and **30**

To a stirred solution of 2-(2-aminoalkyl)phenol (1 equiv.) in 1:1  $\text{CH}_2\text{Cl}_2$ /sat.  $\text{Na}_2\text{CO}_3$  (40 mL in total) was added chloroacetyl chloride (1.1 – 2.0 equiv.) at room temperature. The reaction mixture was stirred for 4 hours. The organic layer was separated and the aqueous layer was extracted with DCM (3 x 10 mL). The combined organic solution was dried over  $\text{Na}_2\text{SO}_4$ , and concentrated *in vacuo*. The crude product was purified with flash column chromatography on silica gel (1:4 EtOAc/Hexanes).

#### 2-Chloro-*N*-(2-hydroxyphenethyl)acetamide (**29**)

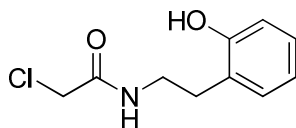

The general procedure was followed: 2-(2-aminoethyl)phenol (0.05 g, 0.36 mmol, 1 equiv.), chloroacetyl chloride (0.03 mL, 0.38 mmol, 1.04 equiv.), 1:1  $\text{CH}_2\text{Cl}_2$ /sat.  $\text{Na}_2\text{CO}_3$  (6 mL in total). Purification with flash column chromatography on silica gel (1:4 EtOAc/Hexanes) afforded **29** (0.036 g, 46%) as light yellow oil.  $^1\text{H}$  NMR (500 MHz,  $\text{CDCl}_3$ ):  $\delta$  7.13 (dt,  $J = 1.4$  Hz,  $J = 7.9$  Hz, 2H), 7.09 (d,  $J = 7.7$  Hz, 1H), 6.85 (m, 3H), 4.05 (s, 2H), 3.53 (dd,  $J = 6.9$  Hz,  $J = 12.7$  Hz, 2H), 2.89 (t,  $J = 7.1$  Hz, 2H).  $^{13}\text{C}$  NMR (126 MHz,  $\text{CDCl}_3$ ):  $\delta$  167.3,



154.7, 130.9, 128.5, 124.8, 120.8, 116.0, 42.8, 41.0, 30.2. HRMS (ESI): 214.0629 (M+1); calcd for  $C_{10}H_{13}NO_2Cl$ : 214.0635. IR (neat): 3291 (br), 1650, 1608  $cm^{-1}$ .

### 2-Chloro-N-(2-hydroxybenzyl)acetamide (**30**)

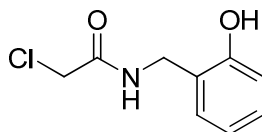

The general procedure was followed: 2-(2-aminomethyl)phenol (0.30 g, 2.4 mmol, 1 equiv.), chloroacetyl chloride (0.39 mL, 4.9 mmol, 2 equiv.), 1:1  $CH_2Cl_2$ /sat.  $Na_2CO_3$  (40 mL in total). Purification with flash column chromatography on silica gel (1:4 EtOAc/Hexanes) afforded **30** (0.43 g, 88%) as light yellow oil.  $^1H$  NMR (500 MHz,  $CDCl_3$ ) indicated a 55:45 ratio of two conformers:  $\delta$  7.64 (broad s, 1H x 0.55 conformer A), 7.34 (m, 1H), 7.24 (m, 1H x 0.55 conformer A), 7.19 (m, 1H x 0.55 conformer A), 7.12 (dt,  $J = 1.5$  Hz,  $J = 8.3$  Hz, 1H), 7.08 (broad s, 1H x 0.45 conformer B), 6.91 (dd,  $J = 1.0$  Hz,  $J = 8.1$  Hz, 1H x 0.45 conformer B), 6.83 (dt,  $J = 1.1$  Hz,  $J = 7.4$  Hz, 1H), 4.43 (d,  $J = 6.0$  Hz, 1H x 0.45 conformer B), 4.41 (d,  $J = 6.4$  Hz, 1H x 0.55 conformer), 4.34 (s, 1H), 4.01 (overlap of two singlets of conformers A and B, 2H).  $^{13}C$  NMR (126 MHz,  $CDCl_3$ ):  $\delta$  168.3, 166.9, 166.5, 155.6, 148.9, 131.0, 130.7, 130.2, 129.8, 127.3, 123.7, 122.6, 120.4, 117.4, 42.6, 41.1, 40.7, 39.3. HRMS (ESI): 200.0473 (M+1); calcd for  $C_9H_{11}NO_2Cl$ : 200.0478

### General Procedure for **4f** – **g**

To a stirred mixture of **27**<sup>1</sup> (1.3 equiv.) and  $K_2CO_3$  (2 equiv.) in 2:3 acetone/chloroform (25 mL in total) was added haloacetamide (1 equiv.). The reaction was refluxed for 18 hr monitoring by TLC. The solution was filtered and the solid was washed with chloroform (10 mL). The filtrate was concentrated *in vacuo*, and then purified by flash column chromatography on silica gel (1:4 MeOH/EtOAc)

### 2-(4-Benzylpiperazin-1-yl)-N-(2-hydroxyphenethyl)acetamide (**4f**)

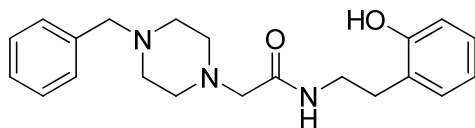

The general procedure was followed: **27** (0.15 g, 0.84 mmol, 1.3 equiv.), **29** (0.14 g, 0.64 mmol, 1 equiv.),  $K_2CO_3$  (0.18 g, 1.3 mmol, 2 equiv.) in 2:3 acetone/chloroform (5 mL in total). Purification with flash column chromatography on silica gel (1:4 EtOAc/Hexanes) afforded **4f** (0.21 g, 91%) as white semi-solid.  $^1H$  NMR (500 MHz,  $CDCl_3$ ):  $\delta$  8.69 (s, 1H), 7.50 (t,  $J = 5.6$  Hz, 1H), 7.30 (m, 5H), 7.08 (m, 2H), 6.83 (d,  $J = 7.9$  Hz,

1H), 6.78 (t,  $J = 7.4$  Hz, 1H), 3.57 (td,  $J = 6.7$  Hz,  $J = 13.0$  Hz, 2H), 3.52 (s, 2H), 3.00 (s, 2H), 2.88 (t,  $J = 6.9$  Hz, 2H), 2.46 (d, 8H).  $^{13}\text{C}$  NMR (126 MHz,  $\text{CDCl}_3$ ):  $\delta$  171.6, 155.5, 137.8, 130.8, 129.5, 128.5, 128.2, 127.5, 125.2, 119.9, 116.1, 63.1, 61.4, 53.5, 53.1, 39.4, 30.7. HRMS (ESI): 354.2173 (M+1); calcd for  $\text{C}_{21}\text{H}_{28}\text{N}_3\text{O}_2$ : 354.2182. IR (neat): 3585, 3319 (br), 1650, 1607  $\text{cm}^{-1}$ . Purity: 95% (LC-MS).

#### 2-(4-Benzylpiperazin-1-yl)-N-(2-hydroxybenzyl)acetamide (**4g**)

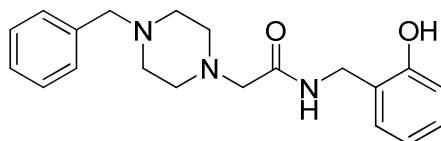

The general procedure was followed: **27** (0.48 g, 2.7 mmol, 1.3 equiv.), **30** (0.43 g, 2.1 mmol, 1 equiv.),  $\text{K}_2\text{CO}_3$  (0.58 g, 4.2 mmol, 2 equiv.) in 2:3 acetone/chloroform (25 mL in total). Purification with flash column chromatography on silica gel (1:4 EtOAc/Hexanes) afforded **4g** (0.62 g, 86%) as white solid.  $^1\text{H}$  NMR (500 MHz,  $\text{CDCl}_3$ ):  $\delta$  9.41 (s, 1H), 7.91 (s, 1H), 7.25 (m, 5H), 7.17 (t,  $J = 7.6$  Hz, 1H), 7.09 (d,  $J = 7.3$  Hz, 1H), 6.89 (d,  $J = 8.0$  Hz, 1H), 6.79 (t,  $J = 7.3$  Hz, 1H), 4.33 (d,  $J = 6.7$  Hz, 2H), 3.47 (s, 2H), 3.00 (s, 2H), 2.45 (broad d, 8H).  $^{13}\text{C}$  NMR (126 MHz,  $\text{CDCl}_3$ ):  $\delta$  173.2, 156.2, 138.0, 130.9, 130.2, 129.4, 128.5, 127.4, 124.5, 120.0, 118.2, 63.1, 61.0, 53.8, 53.2, 40.2. HRMS (ESI): 340.2020 (M+1); calcd for  $\text{C}_{20}\text{H}_{26}\text{N}_3\text{O}_2$ : 340.2025. IR (neat): 3584, 3368 (br), 1653, 1600  $\text{cm}^{-1}$ . m.p.: 119-119.8  $^\circ\text{C}$ . Purity: 97% (HPLC).

### Scheme S5. Syntheses of **2d** and **4e**

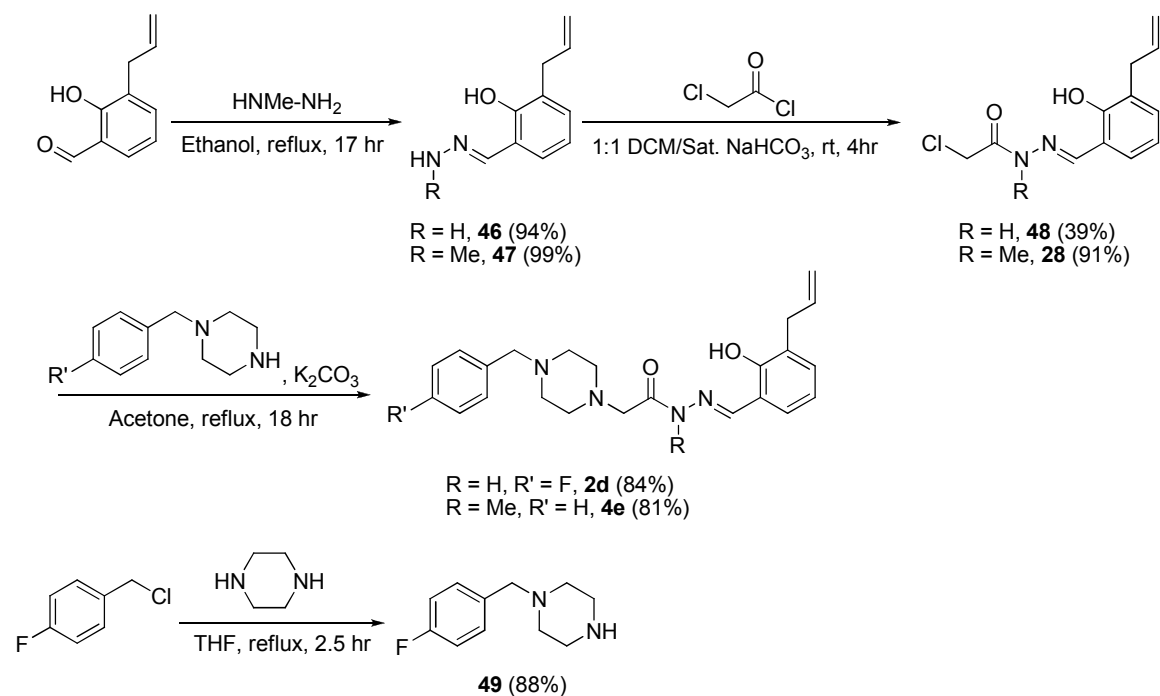

### 2-Allyl-6-((2-methylhydrazono)methyl)phenol (**47**)

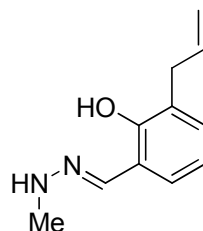

To a stirred solution of 3-allylsalicylaldehyde (0.50g, 3.1 mmol, 1 equiv.) in EtOH (47 mL) was added methylhydrazine (0.32 mL, 6.1 mmol, 2 equiv.) at room temperature. The reaction mixture was refluxed for 17 hr. The solvent was evaporated. The residue was purified by flash column chromatography on silica gel (1:9 EtOAc/Hexanes) to give **47** (0.58g, 99%) as yellow liquid.  $^1\text{H}$  NMR (500 MHz,  $\text{CDCl}_3$ ):  $\delta$  11.65 (broad s, 1H), 7.66 (s, 1H), 7.10 (d,  $J = 7.4$  Hz, 1H), 7.03 (d,  $J = 7.6$  Hz, 1H), 6.85 (t,  $J = 7.5$  Hz, 1H), 6.09 (tdd,  $J = 6.5$  Hz,  $J = 10.0$  Hz,  $J = 16.8$  Hz, 1H), 5.30 (broad s, 1H), 5.12 (m, 2H), 3.49 (d,  $J = 6.5$  Hz, 2H), 2.95 (s, 3H).  $^{13}\text{C}$  NMR (126 MHz,  $\text{CDCl}_3$ ):  $\delta$  155.3, 140.2, 137.2, 129.9, 127.6, 127.5, 119.1, 119.1, 115.6, 35.0, 34.2. HRMS (ESI): 191.1177 (M+1); calcd for  $\text{C}_{11}\text{H}_{15}\text{N}_2\text{O}$ : 191.1184. IR (neat): 3401, 1639, 1617  $\text{cm}^{-1}$ .

### General Procedure for **48** and **28**

To a stirred solution of **48** or **28** (1 equiv.) in 1:1 CH<sub>2</sub>Cl<sub>2</sub>/sat. Na<sub>2</sub>CO<sub>3</sub> (40 mL in total) was added chloroacetyl chloride (1.1 – 2.0 equiv.) at room temperature. The reaction mixture was stirred for 4 hours. The organic layer was separated and the aqueous layer was extracted with DCM (3 x 10 mL). The combined organic solution was dried over Na<sub>2</sub>SO<sub>4</sub>, and concentrated *in vacuo*. The crude product was purified with flash column chromatography on silica gel (1:4 EtOAc/Hexanes).

### *N'*-(3-Allyl-2-hydroxybenzylidene)-2-chloroacetohydrazide (**48**)

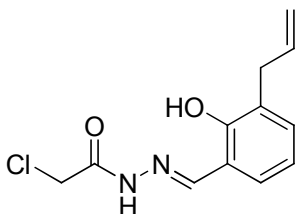

The general procedure was followed: **46** (0.34 g, 1.9 mmol, 1 equiv.), chloroacetyl chloride (0.17 mL, 2.1 mmol, 1.1 equiv.), 1:1 CH<sub>2</sub>Cl<sub>2</sub>/sat. Na<sub>2</sub>CO<sub>3</sub> (31 mL in total). Purification with flash column chromatography on silica gel (1:4 EtOAc/Hexanes) afforded **48** (0.19 g, 39%) as light yellow solid. <sup>1</sup>H NMR (500 MHz, CDCl<sub>3</sub>) indicated a 55:45 ratio of two conformers: δ 11.05 (s, 1H x 0.45 conformer B), 10.04 (s, 1H x 0.55 conformer A), 9.42 (s, 1H x 0.55 conformer A), 8.37 (s, 2H x 0.45 conformer B), 8.05 (s, 1H x 0.45 conformer B), 7.13 (m, 2H x 0.55 conformer A), 6.89 (m, 1H), 6.04 (m, 1H), 5.09 (m, 2H x 0.55 conformer A), 4.47 (s, 2H x 0.45 conformer B), 4.23 (s, 2H x 0.55 conformer A), 3.47 (d, *J* = 6.4 Hz, 2H), 2.67 (m, 2H x 0.45 conformer B). HRMS (ESI): 253.0748 (M+1); calcd for C<sub>11</sub>H<sub>15</sub>N<sub>2</sub>O: 253.0744.

### *N'*-(3-Allyl-2-hydroxybenzylidene)-2-chloro-*N*-methylacetohydrazide (**28**)

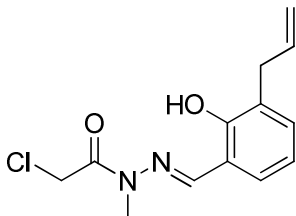

The general procedure was followed: **47** (0.30 g, 2.4 mmol, 1 equiv.), chloroacetyl chloride (0.39 mL, 4.9 mmol, 2 equiv.), 1:1 CH<sub>2</sub>Cl<sub>2</sub>/sat. Na<sub>2</sub>CO<sub>3</sub> (40 mL in total). Purification with flash column chromatography on silica gel (1:4 EtOAc/Hexanes) afforded **28** (0.43 g, 88%) as light yellow oil. <sup>1</sup>H NMR (500 MHz, CDCl<sub>3</sub>) indicated a 82:18 ratio of two conformers: δ 10.20 (s, 1H x 0.82 conformer A), 7.91 (s, 1H x 0.82 conformer B), 7.84 (dd, *J* = 1.9 Hz, *J* = 7.4 Hz, 1H x 0.18 conformer B), 7.74 (s, 1H x 0.18 conformer B), 7.31 (m,

overlap of 1H x 0.18 conformer B and 1H of 0.18 conformer B), 7.23 (d,  $J = 7.4$  Hz, 1H x 0.82 conformer A), 7.18 (dd,  $J = 1.3$  Hz,  $J = 7.7$  Hz, 1H x 0.82 conformer A), 6.93 (t,  $J = 7.6$  Hz, 1H x 0.82 conformer A), 6.04 (m, 1H x 0.82 conformer A), 5.89 (m, 1H x 0.18 conformer B), 5.12 (m, 2H), 4.71 (s, 1H x 0.18 conformer B), 4.54 (s, 2H x 0.82 conformer A), 4.31 (s, 2H x 0.18 conformer B), 3.47 (overlap of two peaks of conformer A, a doublet of 2H and a singlet of 3H), 3.37 (s, 3H x 0.18 conformer A), 3.32 (d,  $J = 6.5$  Hz, 2H x 0.18 conformer B).  $^{13}\text{C}$  NMR (126 MHz,  $\text{CDCl}_3$ ):  $\delta$  166.4, 155.3, 145.1, 136.4, 135.4, 134.5, 133.0, 132.7, 132.5, 130.1, 128.3, 127.4, 125.1, 120.0, 117.3, 117.2, 116.2, 43.1, 42.5, 40.5, 34.9, 33.8, 28.6. HRMS (ESI): 267.0896 (M+1); calcd for  $\text{C}_{13}\text{H}_{16}\text{N}_2\text{O}_2\text{Cl}$ : 267.0900. IR (neat): 3330, 2107, 1645  $\text{cm}^{-1}$ .

### General Procedure for **2d** and **4e**

To a stirred mixture of **27** or **49** (1.3 equiv.) and  $\text{K}_2\text{CO}_3$  (2 equiv.) in acetone (25 mL in total) was added **28** or **48** (1 equiv.). The reaction was refluxed for 18 hr monitoring by TLC. The solution was filtered and the solid was washed with chloroform (10 mL). The filtrate was concentrated *in vacuo*, and then purified by flash column chromatography on silica gel (1:4 MeOH/EtOAc).

### *N'*-(3-allyl-2-hydroxybenzylidene)-2-(4-(4-fluorobenzyl)piperazin-1-yl)acetohydrazide (**2d**)

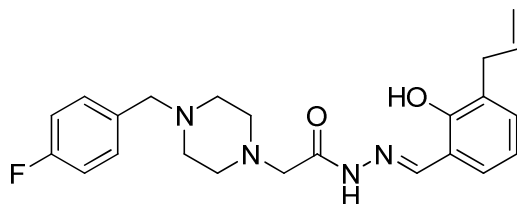

The general procedure was followed: **49** (0.61 g, 3.2 mmol, 1.5 equiv.), **48** (0.43 g, 2.1 mmol, 1 equiv.),  $\text{K}_2\text{CO}_3$  (0.87 g, 6.3 mmol, 3 equiv.) in acetone (25 mL in total). Purification with flash column chromatography on silica gel (1:4 MeOH/EtOAc) afforded **2d** (0.62 g, 86%) as white solid.  $^1\text{H}$  NMR (500 MHz,  $\text{CDCl}_3$ ):  $\delta$  11.26 (s, 1H), 10.10 (s, 1H), 8.46 (s, 1H), 7.31 (m, 2H), 7.20 (d,  $J = 7.3$  Hz, 1H), 7.10 (d,  $J = 7.6$  Hz, 1H), 7.03 (t,  $J = 8.6$  Hz, 2H), 6.86 (t,  $J = 7.6$  Hz, 1H), 6.04 (tdd,  $J = 6.6$  Hz,  $J = 10.1$  Hz,  $J = 16.7$  Hz, 1H), 5.08 (m, 2H), 3.56 (s, 2H), 3.46 (d,  $J = 6.5$  Hz, 2H), 3.22 (s, 2H), 2.62 (d, 8H).  $^{13}\text{C}$  NMR (126 MHz,  $\text{CDCl}_3$ ):  $\delta$  216.9, 165.8, 156.7, 151.8, 136.7, 132.6, 130.9, 129.4, 128.5, 119.3, 117.1, 115.9, 115.5, 115.3, 62.1, 61.1, 53.7, 53.0, 34.1.  $^{19}\text{F}$  NMR (400 MHz,  $\text{CDCl}_3$ ):  $\delta$  115.8. HRMS (ESI): 411.2196 (M+1); calcd for  $\text{C}_{23}\text{H}_{28}\text{N}_4\text{O}_2\text{F}$ : 411.2196. IR (neat): 3210, 1686, 1607  $\text{cm}^{-1}$ . m.p.: 113.8-114.5 °C. Purity: 96% (HPLC).

***N'*-(3-allyl-2-hydroxybenzylidene)-2-(4-benzylpiperazin-1-yl)-*N*-methylacetohydrazide (4e)**

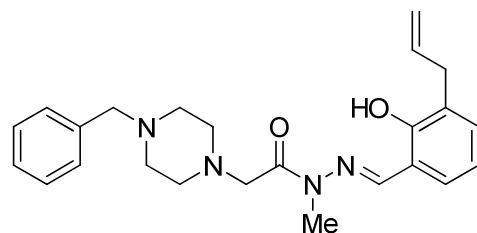

The general procedure was followed: **27** (0.15 g, 0.76 mmol, 1.5 equiv.), **28** (0.14 g, 0.51 mmol, 1 equiv.),  $K_2CO_3$  (0.21 g, 1.5 mmol, 3 equiv.) in acetone (2.4 mL in total). Purification with flash column chromatography on silica gel (1:4 MeOH/EtOAc) afforded **4e** (0.17 g, 81%) as white solid.  $^1H$  NMR (500 MHz,  $CDCl_3$ ):  $\delta$  10.74 (s, 1H), 7.84 (s, 1H), 7.32 (m, 4H), 7.25 (m, 1H), 7.20 (dd,  $J = 0.9$  Hz,  $J = 7.4$  Hz, 1H), 7.15 (dd,  $J = 1.5$  Hz,  $J = 7.7$  Hz, 1H), 6.89 (t,  $J = 7.6$  Hz, 1H), 6.06 (tdd,  $J = 6.7$  Hz,  $J = 10.0$  Hz,  $J = 16.8$  Hz, 1H), 5.12 (m, 1H), 3.59 (s, 2H), 3.53 (s, 2H), 3.47 (d,  $J = 6.7$  Hz, 2H), 3.41 (s, 2H), 2.63 (broad d, 8H).  $^{13}C$  NMR (101 MHz,  $CDCl_3$ ):  $\delta$  169.8, 155.3, 142.9, 138.4, 136.8, 131.9, 129.6, 129.4, 128.4, 128.3, 127.2, 119.5, 117.8, 115.9, 63.2, 61.0, 53.6, 52.9, 34.2, 27.9. HRMS (ESI): 407.2441 (M+1); calcd for  $C_{24}H_{31}N_4O_2$ : 407.2447. IR (neat): 3062 (br), 1681, 1612  $cm^{-1}$ . m.p.: 120-121  $^{\circ}C$ . Purity: 96% (HPLC).

### Scheme S6. Synthesis of AF350-PAC-1 (2h).

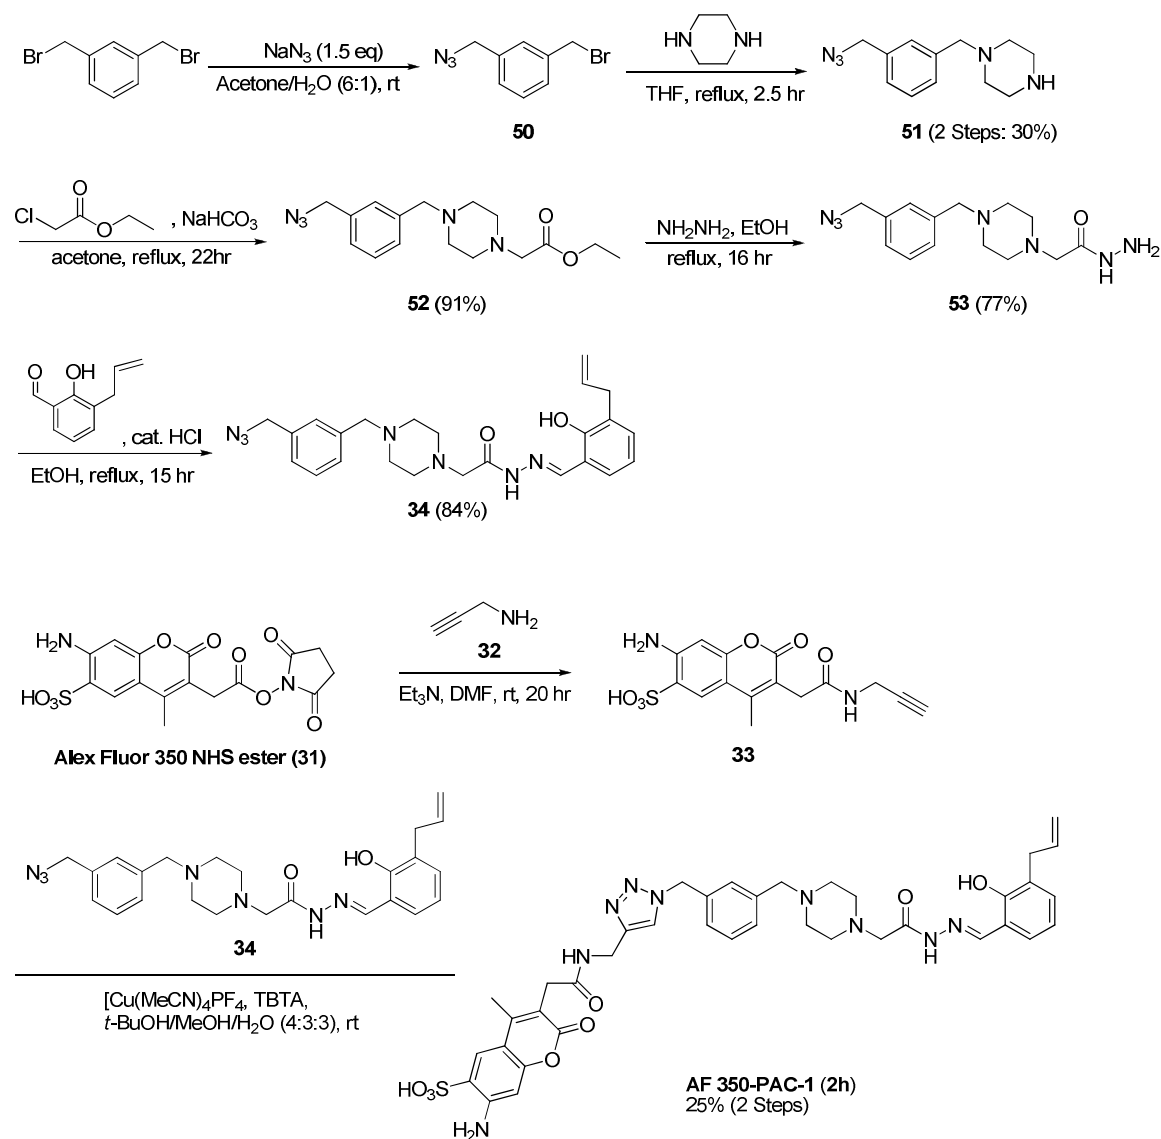

### 1-(3-(azidomethyl)benzyl)piperazine (51)

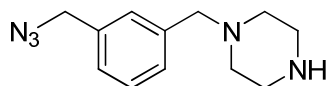

To a stirred solution of  $\alpha, \alpha'$ -dibromo-*m*-xylene (5.0 g, 18.9 mmol, 1 equiv.) in 6:1 acetone/H<sub>2</sub>O (35 mL in total) was added sodium azide (1.8 g, 28.4 mmol, 1.5 equiv.). The reaction mixture was stirred for 10 hr at room temperature. The mixture was diluted with DCM (30 mL), washed with H<sub>2</sub>O (20 mL) and brine (20 mL), dried over Na<sub>2</sub>SO<sub>4</sub>, filtered, concentrated *in vacuo*. After column chromatography on silica gel (9:1 Hexanes/ EtOAc), a mixture of **50** and minor diazido-*m*-xylene was obtained as light yellow liquid.

Anhydrous piperazine (4.0 g, 46.5 mmol, 6 equiv.) was added to THF (17 mL), and the mixture was heated to reflux until the piperazine was fully dissolved. To the solution the mixture of **50** and minor diazido-m-xylene (1.75g, 7.7 mmol, 1 equiv.) was added dropwise. White precipitate was formed immediately. The reaction mixture was refluxed for 3 hr. The stirring mixture was cooled and then filtered. The solids were washed with THF (15 mL) and then EtOAc (15 mL). The combined organic layer was concentrated *in vacuo*, which was then washed with basic water with 5% brine and KOH (pH >12). The aqueous layer was extracted with CH<sub>2</sub>Cl<sub>2</sub> (3 x 15 mL) and EtOAc (15 mL) at pH > 12. The organic layers were combined, dried over Na<sub>2</sub>SO<sub>4</sub> and concentrated *in vacuo*. The crude product was purified by flash column chromatography on silica gel (1:4 MeOH/EtOAc) to afford **51** (0.66 g, 30% over 2 steps) as light yellow liquid. <sup>1</sup>H NMR (500 MHz, CDCl<sub>3</sub>): δ 7.29 (m, 3H), 7.18 (d, *J* = 7.2 Hz, 1H), 4.30 (s, 2H), 3.47 (s, 2H), 2.85 (t, *J* = 4.9 Hz, 4H), 2.38 (s, 4H), 1.75 (s, 1H). <sup>13</sup>C NMR (126 MHz, CDCl<sub>3</sub>): δ 139.2, 135.5, 129.4, 129.2, 128.9, 127.2, 63.7, 54.9, 54.8, 46.3. HRMS (ESI): 232.1552 (M+1); calcd for C<sub>12</sub>H<sub>18</sub>N<sub>5</sub>: 232.1562

#### Ethyl 2-(4-(3-(azidomethyl)benzyl)piperazin-1-yl)acetate (**52**)

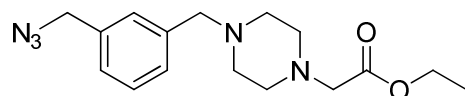

To a stirred mixture of **51** (0.6 g, 2.6 mmol, 1 equiv.) and NaHCO<sub>3</sub> (0.27 g, 3.3 mmol, 1.25 equiv.) in acetone (5 mL) was added ethyl chloroacetate (0.31 mL, 2.9 mmol, 1 equiv.). The reaction was refluxed for 22 hr monitoring by TLC. The solution was filtered and the solid was washed with acetone (5 mL). The filtrate was concentrated *in vacuo*, and then purified by flash column chromatography on silica gel (1:1 EtOAc/Hexanes) to give **52** (0.75 g, 91%) as yellow liquid. <sup>1</sup>H NMR (500 MHz, CDCl<sub>3</sub>): δ 7.28 (m, 3H), 7.17 (d, *J* = 7.3 Hz, 1H), 4.29 (s, 2H), 4.15 (q, *J* = 7.1 Hz, 2H), 3.50 (s, 2H), 3.17 (s, 2H), 2.54 (broad d, 8H), 1.23 (t, *J* = 7.1 Hz, 3H). <sup>13</sup>C NMR (126 MHz, CDCl<sub>3</sub>): δ 170.5, 139.1, 135.5, 129.3, 129.1, 128.9, 127.2, 62.9, 60.8, 59.7, 54.9, 53.2, 53.0, 14.5. HRMS (ESI): 318.1923 (M+1); calcd for C<sub>16</sub>H<sub>24</sub>N<sub>5</sub>O<sub>2</sub>: 318.1930. IR (neat): 2098, 1739 cm<sup>-1</sup>.

#### N'-(3-allyl-2-hydroxybenzylidene)-2-(4-(3-(azidomethyl)benzyl)piperazin-1-yl)acetohydrazide (**53**)

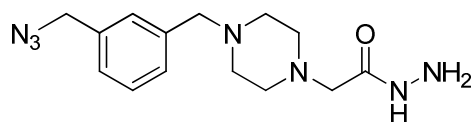

To a stirred solution of **52** (0.7 g, 2.2 mmol, 1 equiv.) in ethanol (4.4 mL, 0.5 M) was added anhydrous hydrazine (0.21 mL, 6.6 mmol, 3 equiv.). The reaction was refluxed for 16 hr monitoring by TLC. The



reaction mixture was concentrated *in vacuo*. The residue was dissolved in CH<sub>2</sub>Cl<sub>2</sub> (10 mL) and washed with water (10 mL) and brine (10 mL). The aqueous layer was extracted with CH<sub>2</sub>Cl<sub>2</sub> (3 x 10 mL) and EtOAc (10 mL). The combined organic layer was dried over Na<sub>2</sub>SO<sub>4</sub>, filtered and concentrated *in vacuo*. The crude product was purified by flash column chromatography on silica gel (1:4 MeOH/EtOAc) to yield **53** (0.52 g, 77%) as yellow oil. <sup>1</sup>H NMR (500 MHz, CDCl<sub>3</sub>): δ 8.15 (s, 1H), 7.31 (t, *J* = 7.8 Hz, 1H), 7.26 (d, *J* = 6.1 Hz, 2H), 7.19 (d, *J* = 7.4 Hz, 1H), 4.31 (s, 2H), 3.85 (s, 2H), 3.50 (s, 2H), 3.05 (s, 2H), 2.48 (d, *J* = 7.4 Hz, 8H). <sup>13</sup>C NMR (126 MHz, CDCl<sub>3</sub>): δ 170.7, 138.9, 135.6, 129.3, 129.1, 129.0, 127.3, 62.8, 60.8, 54.9, 53.8, 53.3. HRMS (ESI): 304.1877 (M+1); calcd for C<sub>14</sub>H<sub>22</sub>N<sub>7</sub>O: 304.1886

***N'*-(3-allyl-2-hydroxybenzylidene)-2-(4-(3-(azidomethyl)benzyl)piperazin-1-yl)acetohydrazide (34)**

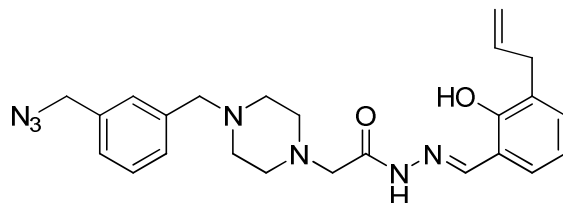

To a stirred solution of 3-allylsalicylaldehyde (0.16 g, 0.99 mmol, 1 equiv.) in ethanol (6 mL), **53** (0.51 g, 1.7 mmol, 1.7 equiv.) and HCl (10 mol%) were added. The reaction was refluxed for 15 hr. The solution was concentrated *in vacuo*, and then purified by flash column chromatography on silica gel (1:4 MeOH/EtOAc) to afford **34** (0.37 g, 84%) as yellow oil. <sup>1</sup>H NMR (500 MHz, CDCl<sub>3</sub>): δ 11.28 (s, 1H), 10.04 (s, 1H), 8.38 (s, 1H), 7.35 (t, *J* = 7.7 Hz, 1H), 7.29 (d, *J* = 7.5 Hz, 2H), 7.22 (d, *J* = 7.4 Hz, 1H), 7.18 (dd, *J* = 1.4 Hz, *J* = 7.4 Hz, 1H), 7.08 (dd, *J* = 1.5 Hz, *J* = 7.7 Hz, 1H), 6.84 (t, *J* = 7.6 Hz, 1H), 6.03 (tdd, *J* = 6.6 Hz, *J* = 10.1 Hz, *J* = 16.7 Hz, 1H), 5.07 (m, 2H), 4.34 (s, 2H), 3.56 (s, 2H), 3.45 (d, *J* = 6.6 Hz, 2H), 3.19 (s, 2H), 2.58 (broad d, 8H). <sup>13</sup>C NMR (126 MHz, CDCl<sub>3</sub>): δ 166.1, 156.6, 151.5, 138.8, 136.8, 135.6, 132.5, 129.4, 129.3, 129.1, 128.4, 127.4, 119.7, 119.3, 117.1, 115.9, 62.8, 61.2, 54.9, 53.9, 53.2, 34.1. HRMS (ESI): 448.2460 (M+1); calcd for C<sub>24</sub>H<sub>30</sub>N<sub>7</sub>O<sub>2</sub>: 448.2461. IR (neat): 3221 (br), 2099, 1686, 1608 cm<sup>-1</sup>.

**3-(2-((1-(3-((4-(2-(2-(3-allyl-2-hydroxybenzylidene)hydrazinyl)-2-oxoethyl)piperazin-1-yl)methyl)benzyl)-1H-1,2,3-triazol-4-yl)methylamino)-2-oxoethyl)-7-amino-4-methyl-2-oxo-2H-chromene-6-sulfonic acid (AF350-PAC-1, 2h)**

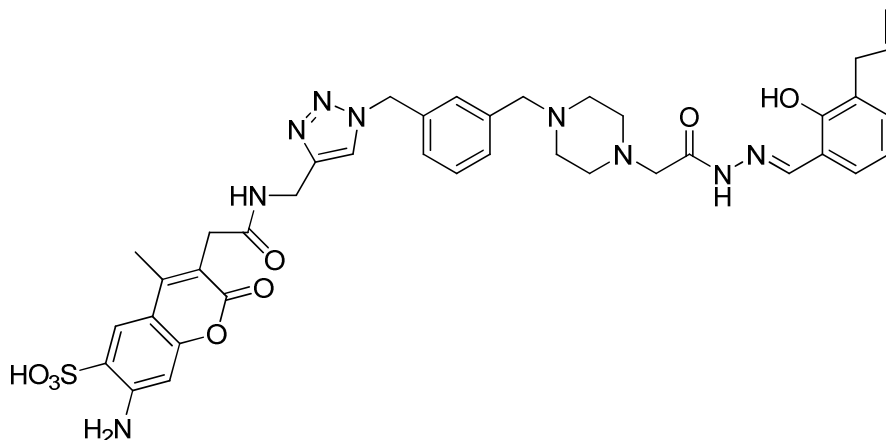

To a solution of propargyl amine·HCl (2.0 mg, 0.022 mmol, 1.8 equiv.) and triethylamine (5.1  $\mu$ L, 0.037 mmol, 3 equiv.) in DMF (150  $\mu$ L) was added Alexa Fluor 350 NHS-ester **31** (5.0 mg, 0.012 mmol, 1 equiv.) in DMF (150  $\mu$ L) at minimal amount of light. The reaction was stirred for 20 hr at room temperature. The crude product was purified by flash column chromatography on silica gel (10% MeOH in EtOAc to 100% MeOH) to give **33** with a small amount of silica gel as light yellow-green solid.

To a solution of  $[\text{Cu}(\text{CH}_3\text{CN})_4]\text{PF}_6$  (5.0 mg, 0.013 mmol, 1.1 equiv.), *tris*-(benzyltriazolylmethyl)amine (TBTA, 7.1 mg, 0.013 mmol, 1.1 equiv.) and **33** (4.3 mg, 0.012 mmol, 1 equiv.) with a small amount of silica gel in 4:3:3 *t*-BuOH/MeOH/H<sub>2</sub>O (1 mL in total) was added **34** (37 mg, 0.082 mmol, 6.7 equiv.) at minimal amount of light. The reaction mixture was stirred for 24 hr at room temperature. Twice purification by flash column chromatography on silica gel (1:4 MeOH/EtOAc) afforded **AF350-PAC-1 (2h)** (2.4 mg, 25% over 2 steps) as light green solid. <sup>1</sup>H NMR (500 MHz, CD<sub>3</sub>OD):  $\delta$  8.33 (s, 1H), 8.03 (s, 1H), 7.78 (s, 1H), 7.35 (m, 3H), 7.27 (m, 2H), 7.16 (m, 2H), 6.83 (m, 1H), 6.57 (s, 1H), 6.01 (m, 1H), 5.56 (s, 2H), 5.01 (m, 2H), 4.41 (s, 1H), 4.36 (s, 1H), 3.57 (m, 4H), 3.41 (m, 2H), 3.20 (m, 2H), 2.58 (broad d, 8H), 2.26 (s, 2H). HRMS (ESI): 798.3032 (M+1); calcd for C<sub>39</sub>H<sub>44</sub>N<sub>9</sub>O<sub>8</sub>S: 789.3034

Purity of **PAC-1 (1)**: 100%

Purity of **1a**: 95%

Purity of **1h**: 99%

## **References**

1. Vichai, V.; Kirtikara, K., Sulforhodamine B colorimetric assay for cytotoxicity screening. *Nat Protoc* **2006**, 1, (3), 1112-6.
2. Peterson, Q. P.; Goode, D. R.; West, D. C.; Ramsey, K. N.; Lee, J.; Hergenrother, P. J., PAC-1 activates procaspase-3 through relief of zinc-mediated inhibition. *J. Mol. Biol.* **2009**, 144-158.
3. Putt, K. S.; Chen, G. W.; Pearson, J. M.; Sandhorst, J. S.; Hoagland, M. S.; Kwon, J.-T.; Hwang, S.-K.; Jin, H.; Churchwell, M. I.; Cho, M.-H.; Doerge, D. R.; Helferich, W. G.; Hergenrother, P. J., Small molecule activation of procaspase-3 to caspase-3 as a personalized anticancer strategy. *Nature Chem Biol* **2006**, 2, 543-550.
4. Dauzonne, D.; Folléas, B.; Martinez, L.; Chabot, G. G., Synthesis and in vitro cytotoxicity of a series of 3-aminoflavones. *European Journal of Medicinal Chemistry* **1997**, 32, (1), 71-82.
5. Kasmal, H. S.; Mischke, S. G., An Efficient and Convenient Synthesis of 2-Mercaptobenzaldehyde. *Synthesis* **1989**, 1989, (10), 763-765.
6. Mehanna, A. S.; Kim, J. Y., Design, synthesis, and biological testing of thiosalicylamides as a novel class of calcium channel blockers. *Bioorganic & Medicinal Chemistry* **2005**, 13, (13), 4323-4331.

1H NMR, CDCl<sub>3</sub>

7.185  
7.163  
6.805  
6.783

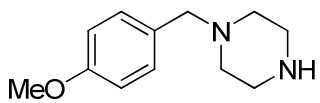

35

3.730  
3.369  
2.822  
2.810  
2.798  
2.331  
1.500

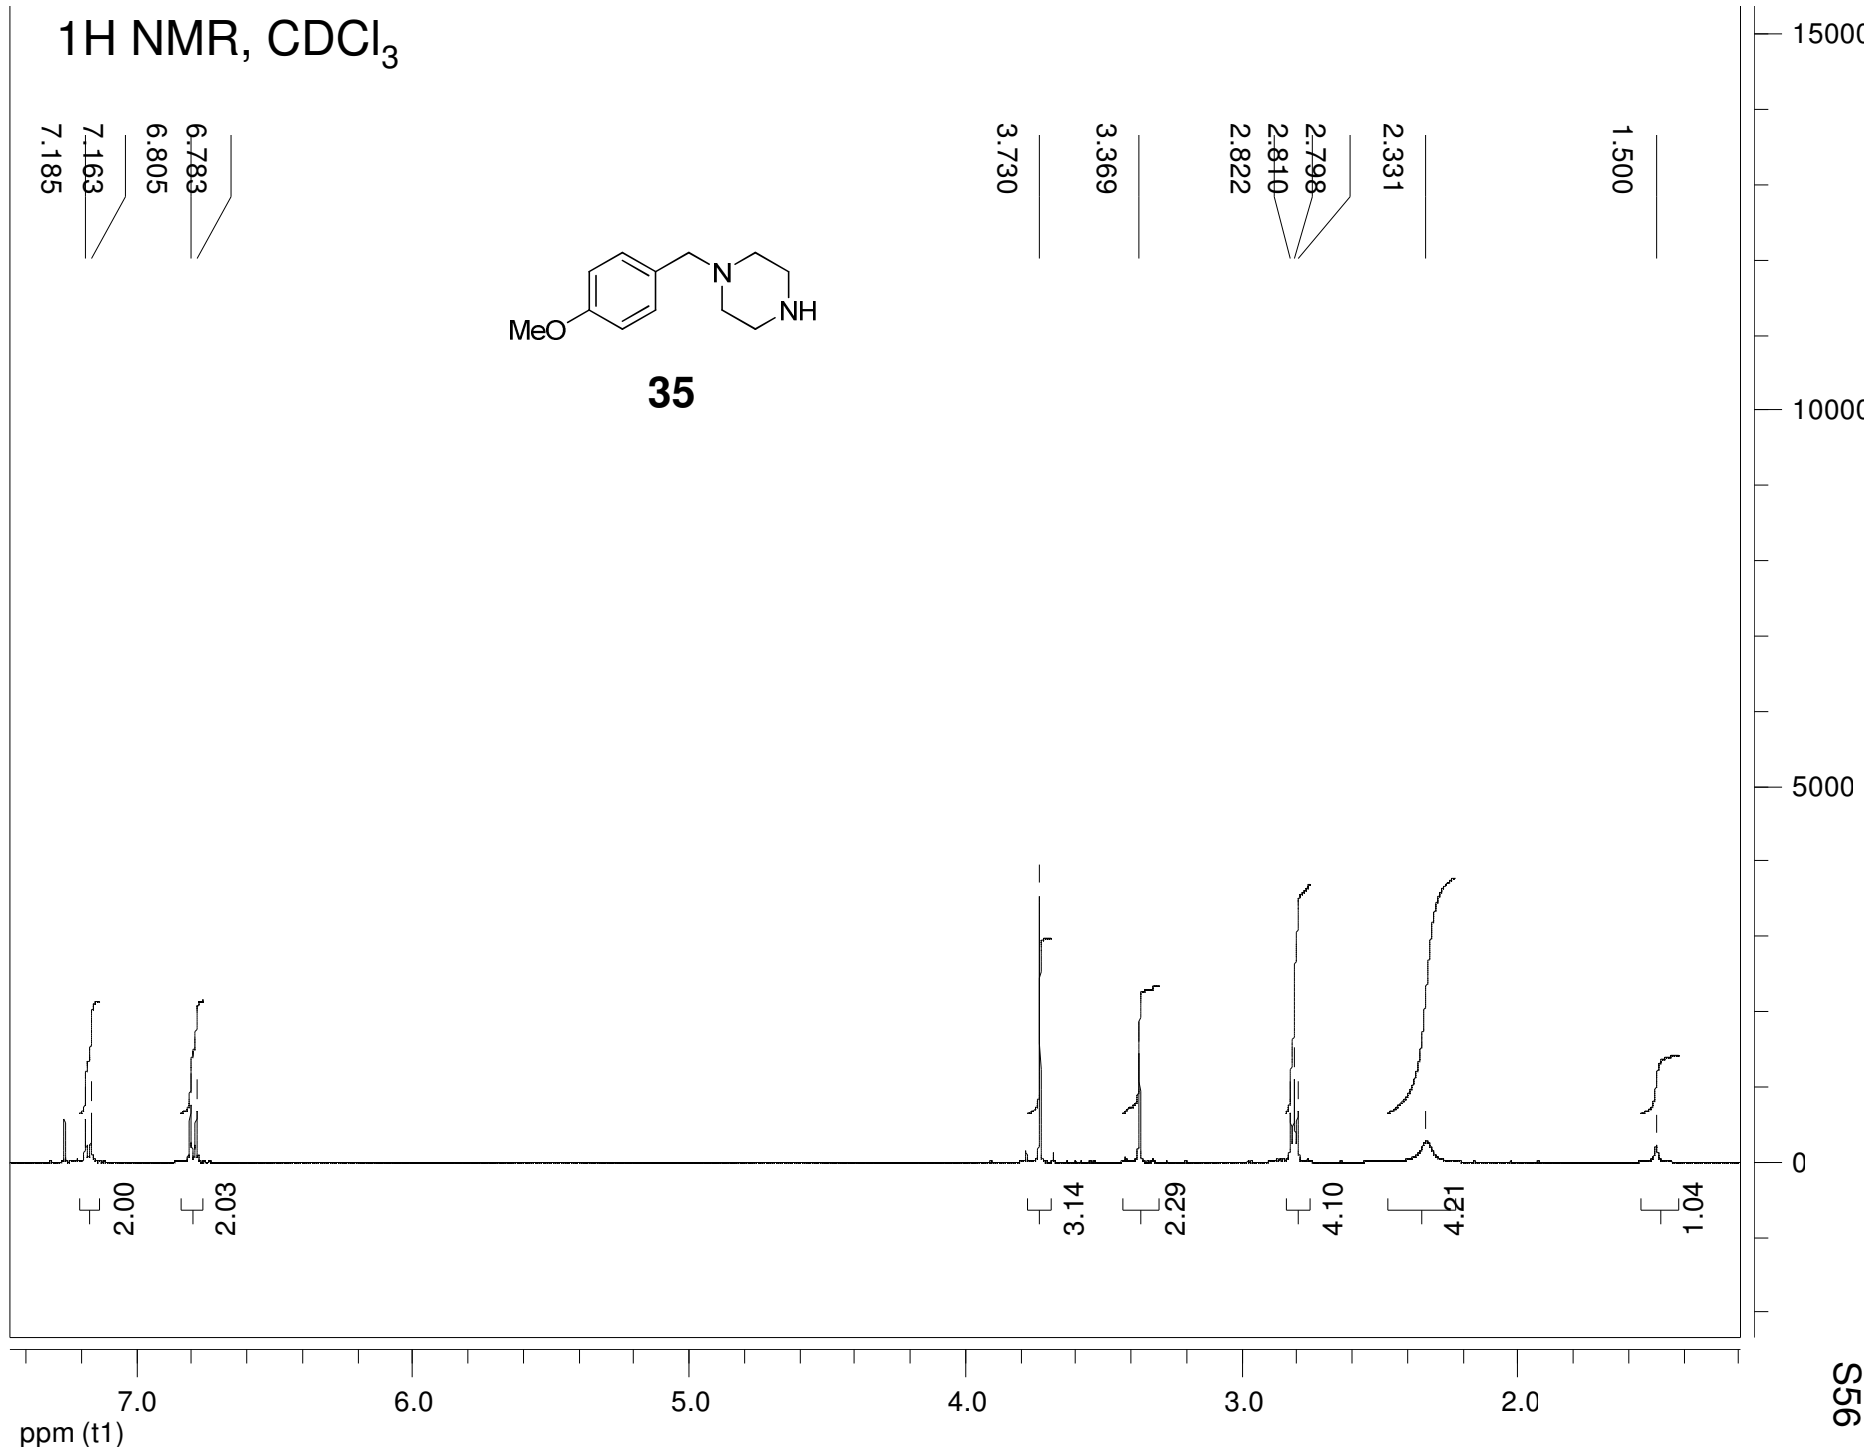

<sup>13</sup>C NMR, CDCl<sub>3</sub>

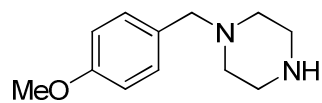

**35**

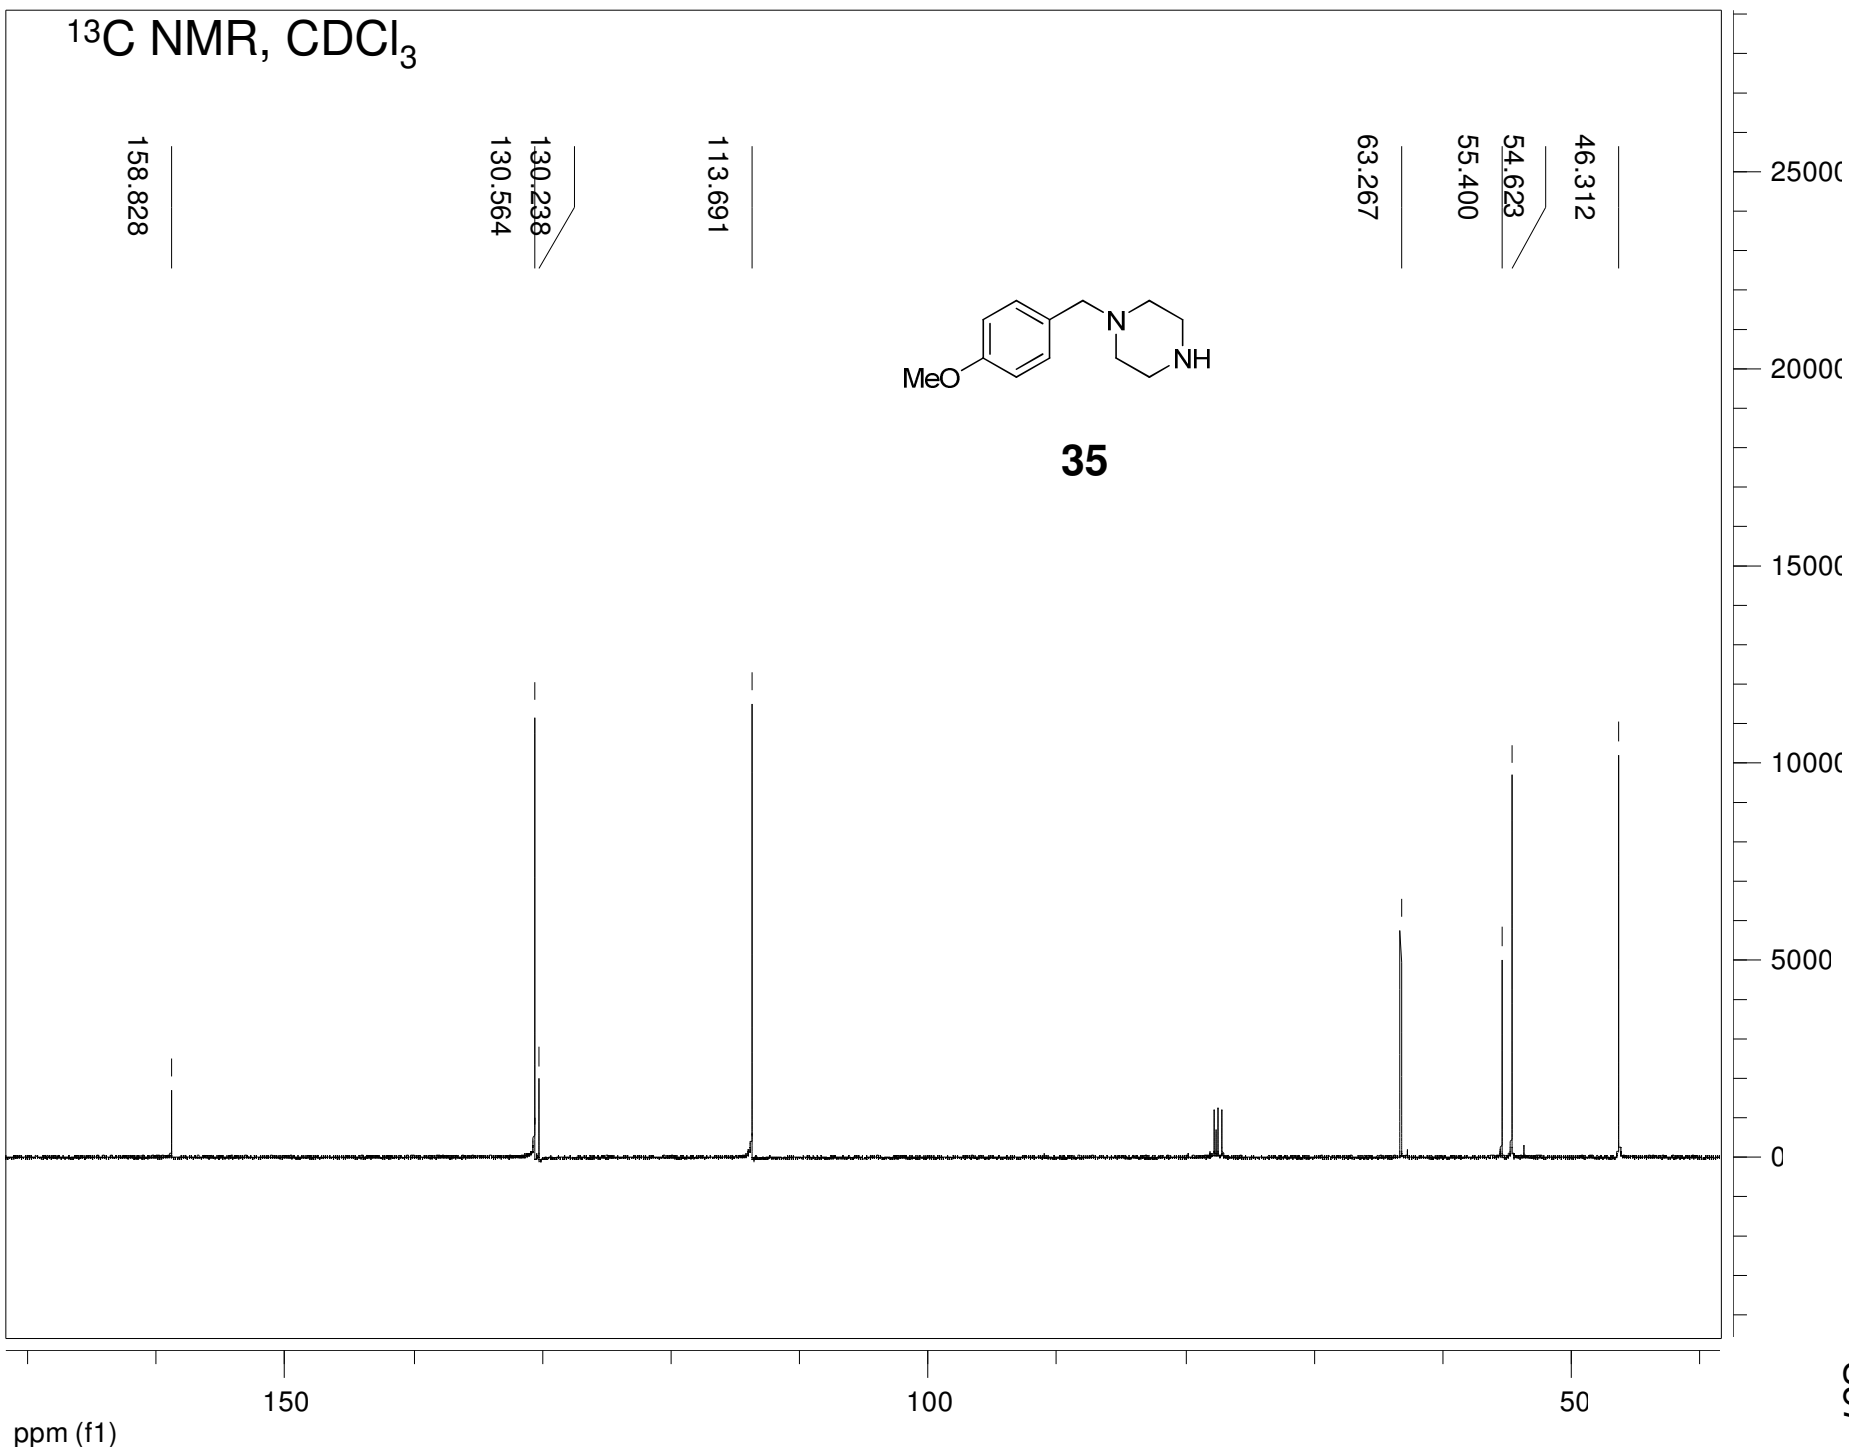

1H NMR, CDCl<sub>3</sub>

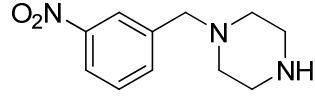

**36**

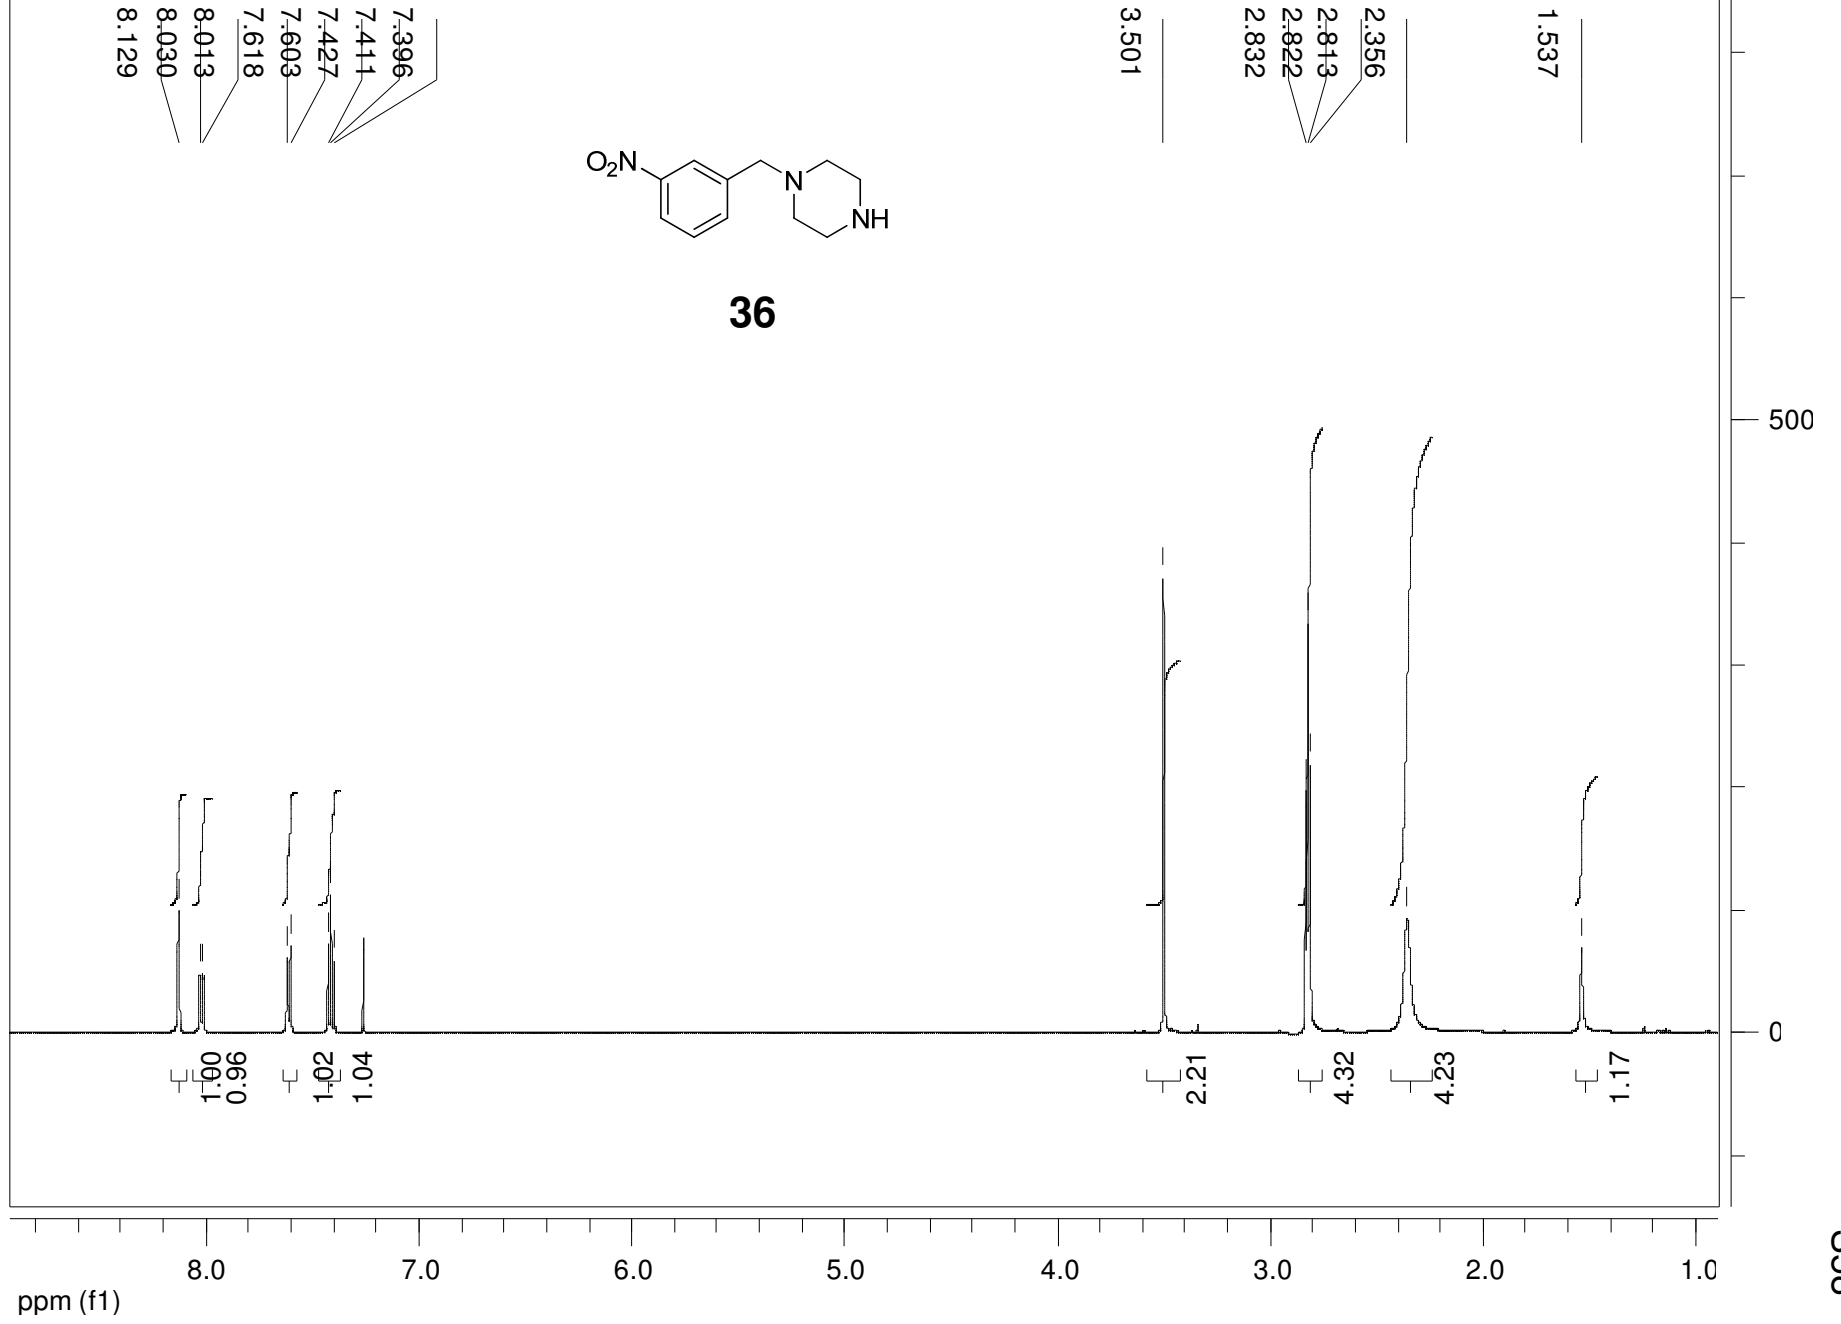

<sup>13</sup>C NMR, CDCl<sub>3</sub>

148.480  
140.972  
135.268  
129.300  
123.888  
122.293

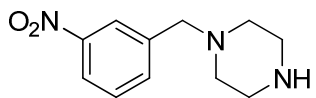

**36**

62.806  
54.655  
46.238

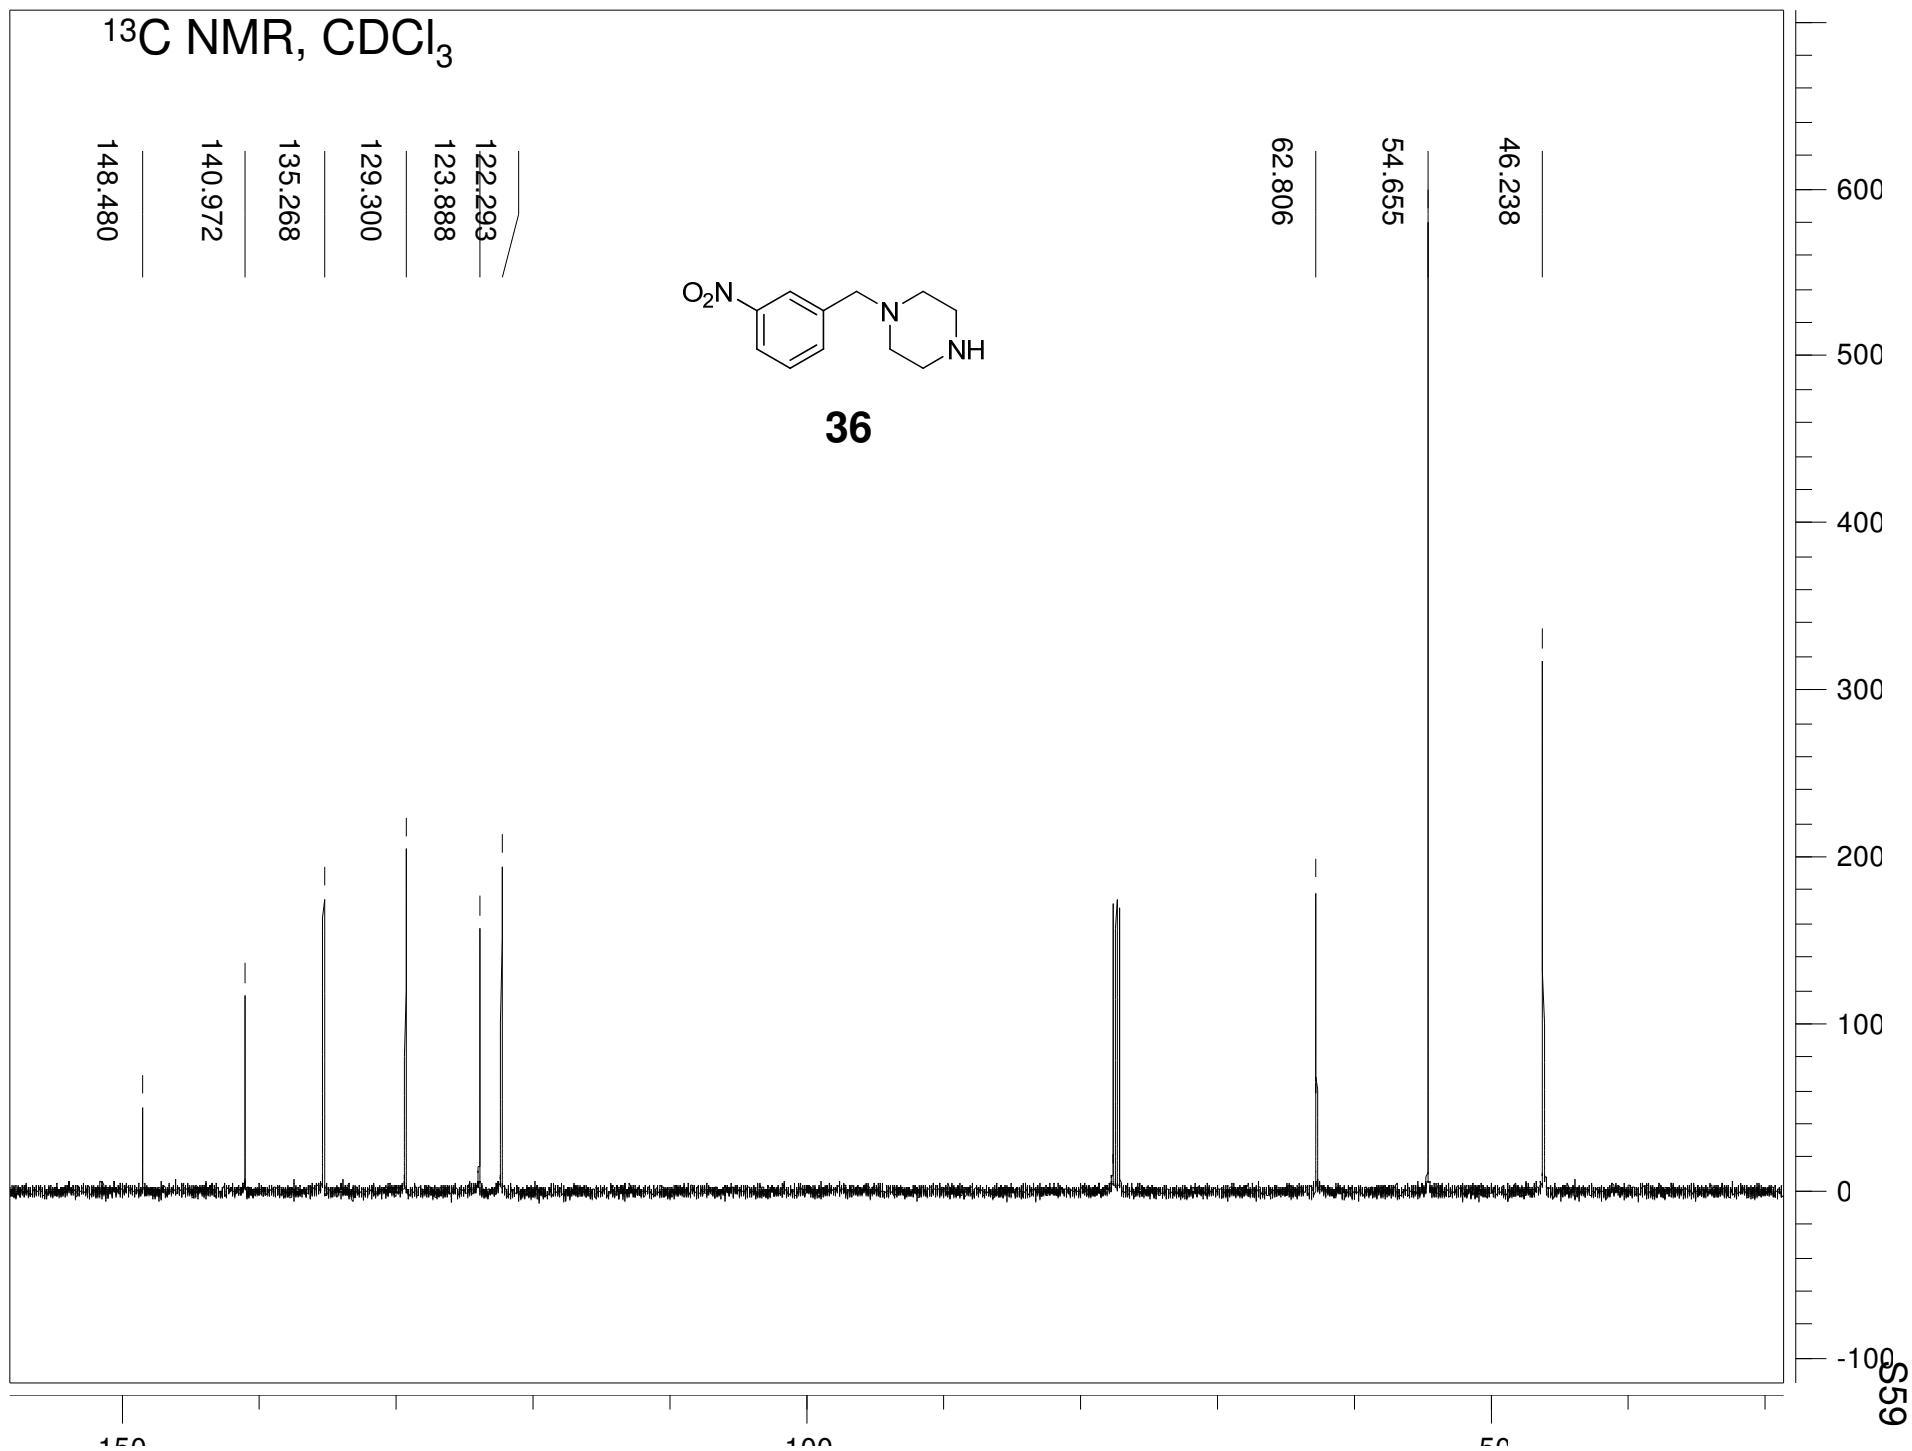

1H NMR, CD<sub>3</sub>OD

7.307  
7.319  
7.322  
7.332  
7.529  
7.544  
7.805  
7.808  
7.820  
7.823  
7.835  
7.839  
8.479  
8.481  
8.489  
8.490

4.190  
4.176  
4.161  
4.147  
3.672  
3.238

2.646  
2.578

1.276  
1.261  
1.247

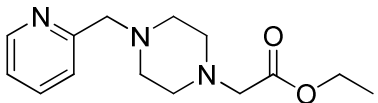

37

0.00  
1.02  
1.01  
1.03

21.2  
90.2  
70.2  
61.8

02.3

ppm (f1)

S60



<sup>13</sup>C NMR, CD<sub>3</sub>OD

170.317

157.903

148.476

137.474

124.024

122.769

63.538

60.515

58.594

52.579

52.551

13.410

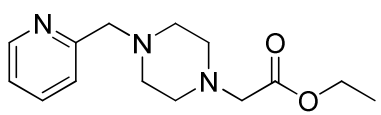

**37**

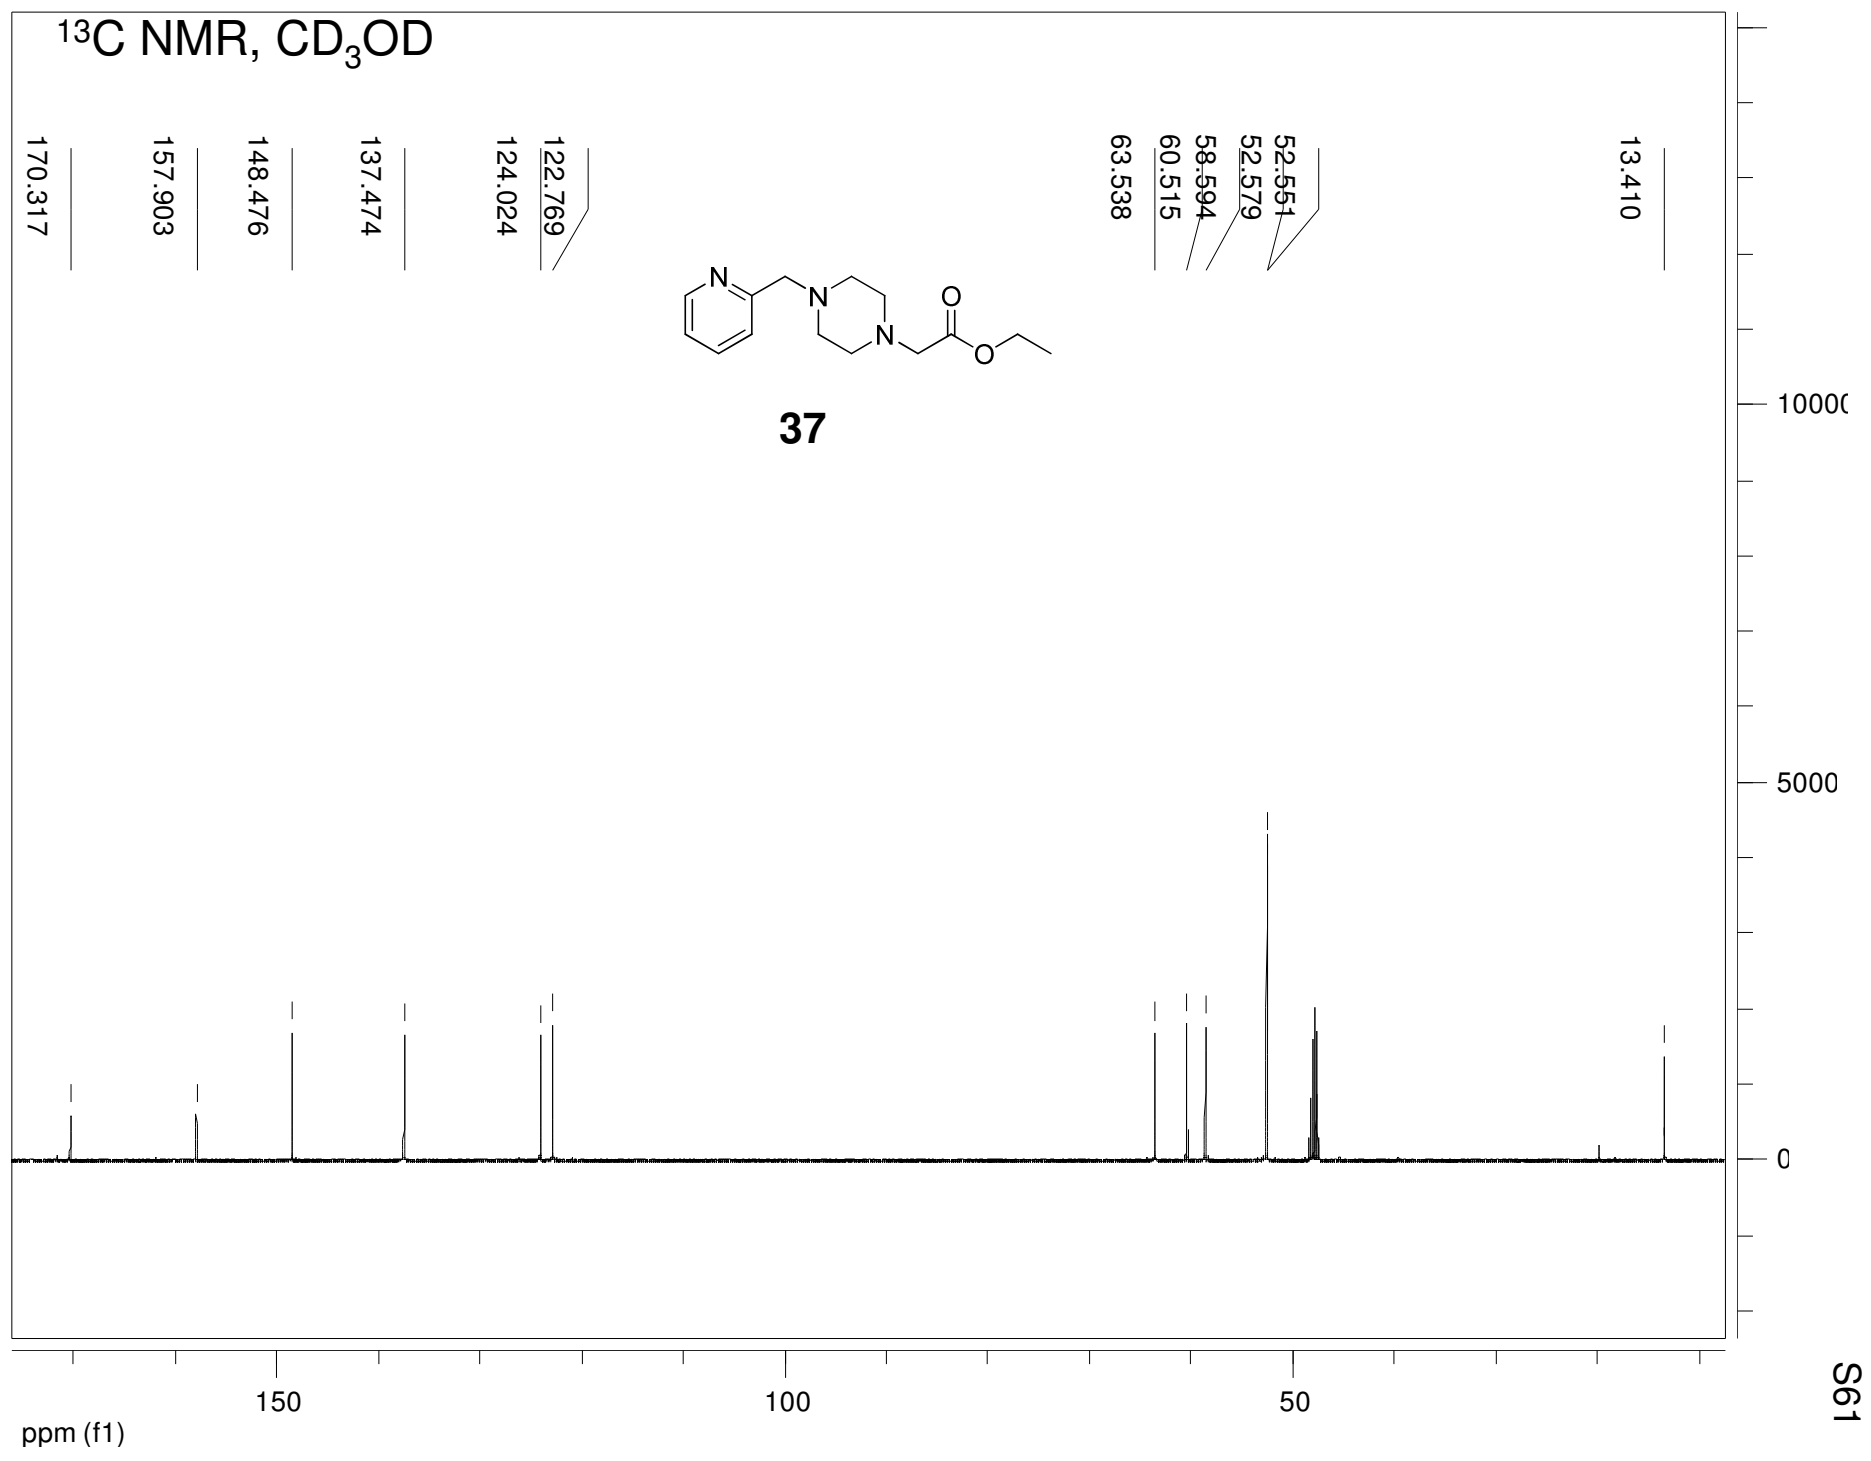

ppm (f1)

150

100

50

S61

1H NMR, CD<sub>3</sub>OD

8.501  
8.498  
8.446  
8.443  
8.437  
8.434  
7.841  
7.838  
7.834  
7.826  
7.822  
7.819  
7.424  
7.415  
7.409  
7.399

4.177  
4.163  
4.149  
4.135  
3.575  
3.229

2.622  
2.524

1.263  
1.248  
1.234

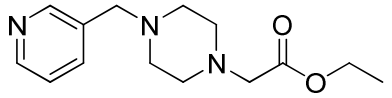

**38**

0.89  
0.89  
1.02

0.22  
0.16  
0.26

8.25

42.3

9.0  
8.0  
7.0  
6.0  
5.0  
4.0  
3.0  
2.0  
1.0  
ppm (t1)

S62

<sup>13</sup>C NMR, CD<sub>3</sub>OD

170.337

149.784  
147.837

138.146  
134.192

123.950

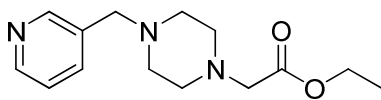

**38**

60.530

59.475

58.529

52.490

52.319

13.381

ppm (f1)

150

100

50

563

300  
250  
200  
150  
100  
50  
0  
-50

1H NMR, CDCl<sub>3</sub>

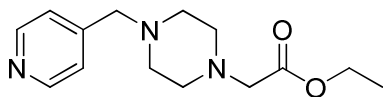

**39**

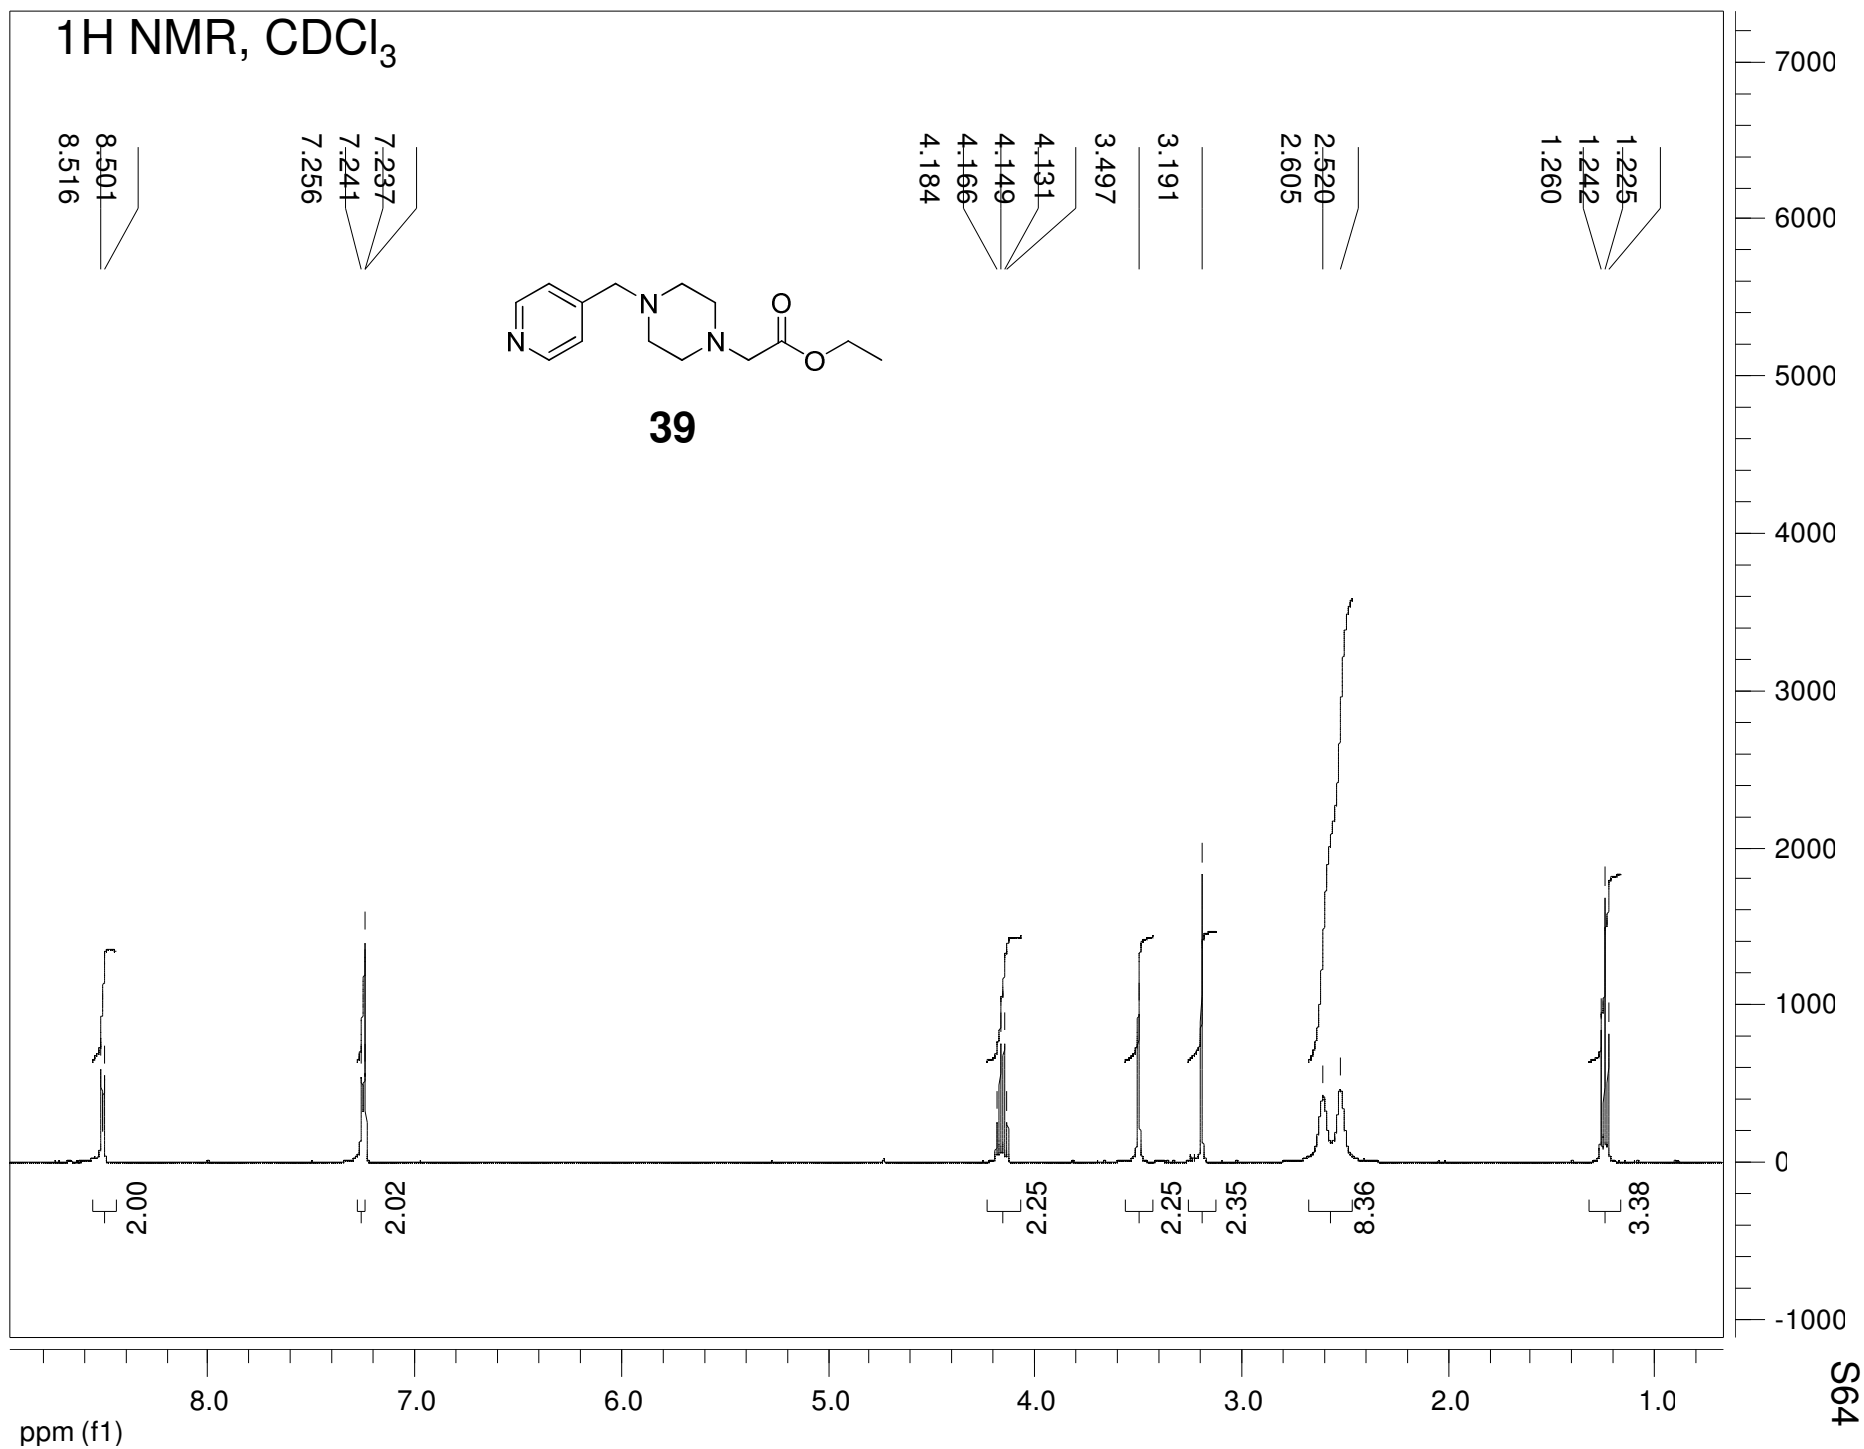

<sup>13</sup>C NMR, CDCl<sub>3</sub>

170.421

149.963

147.711

124.045

61.808

60.814

59.611

53.124

53.105

14.449

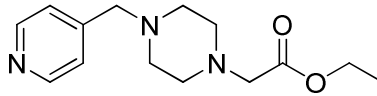

**39**

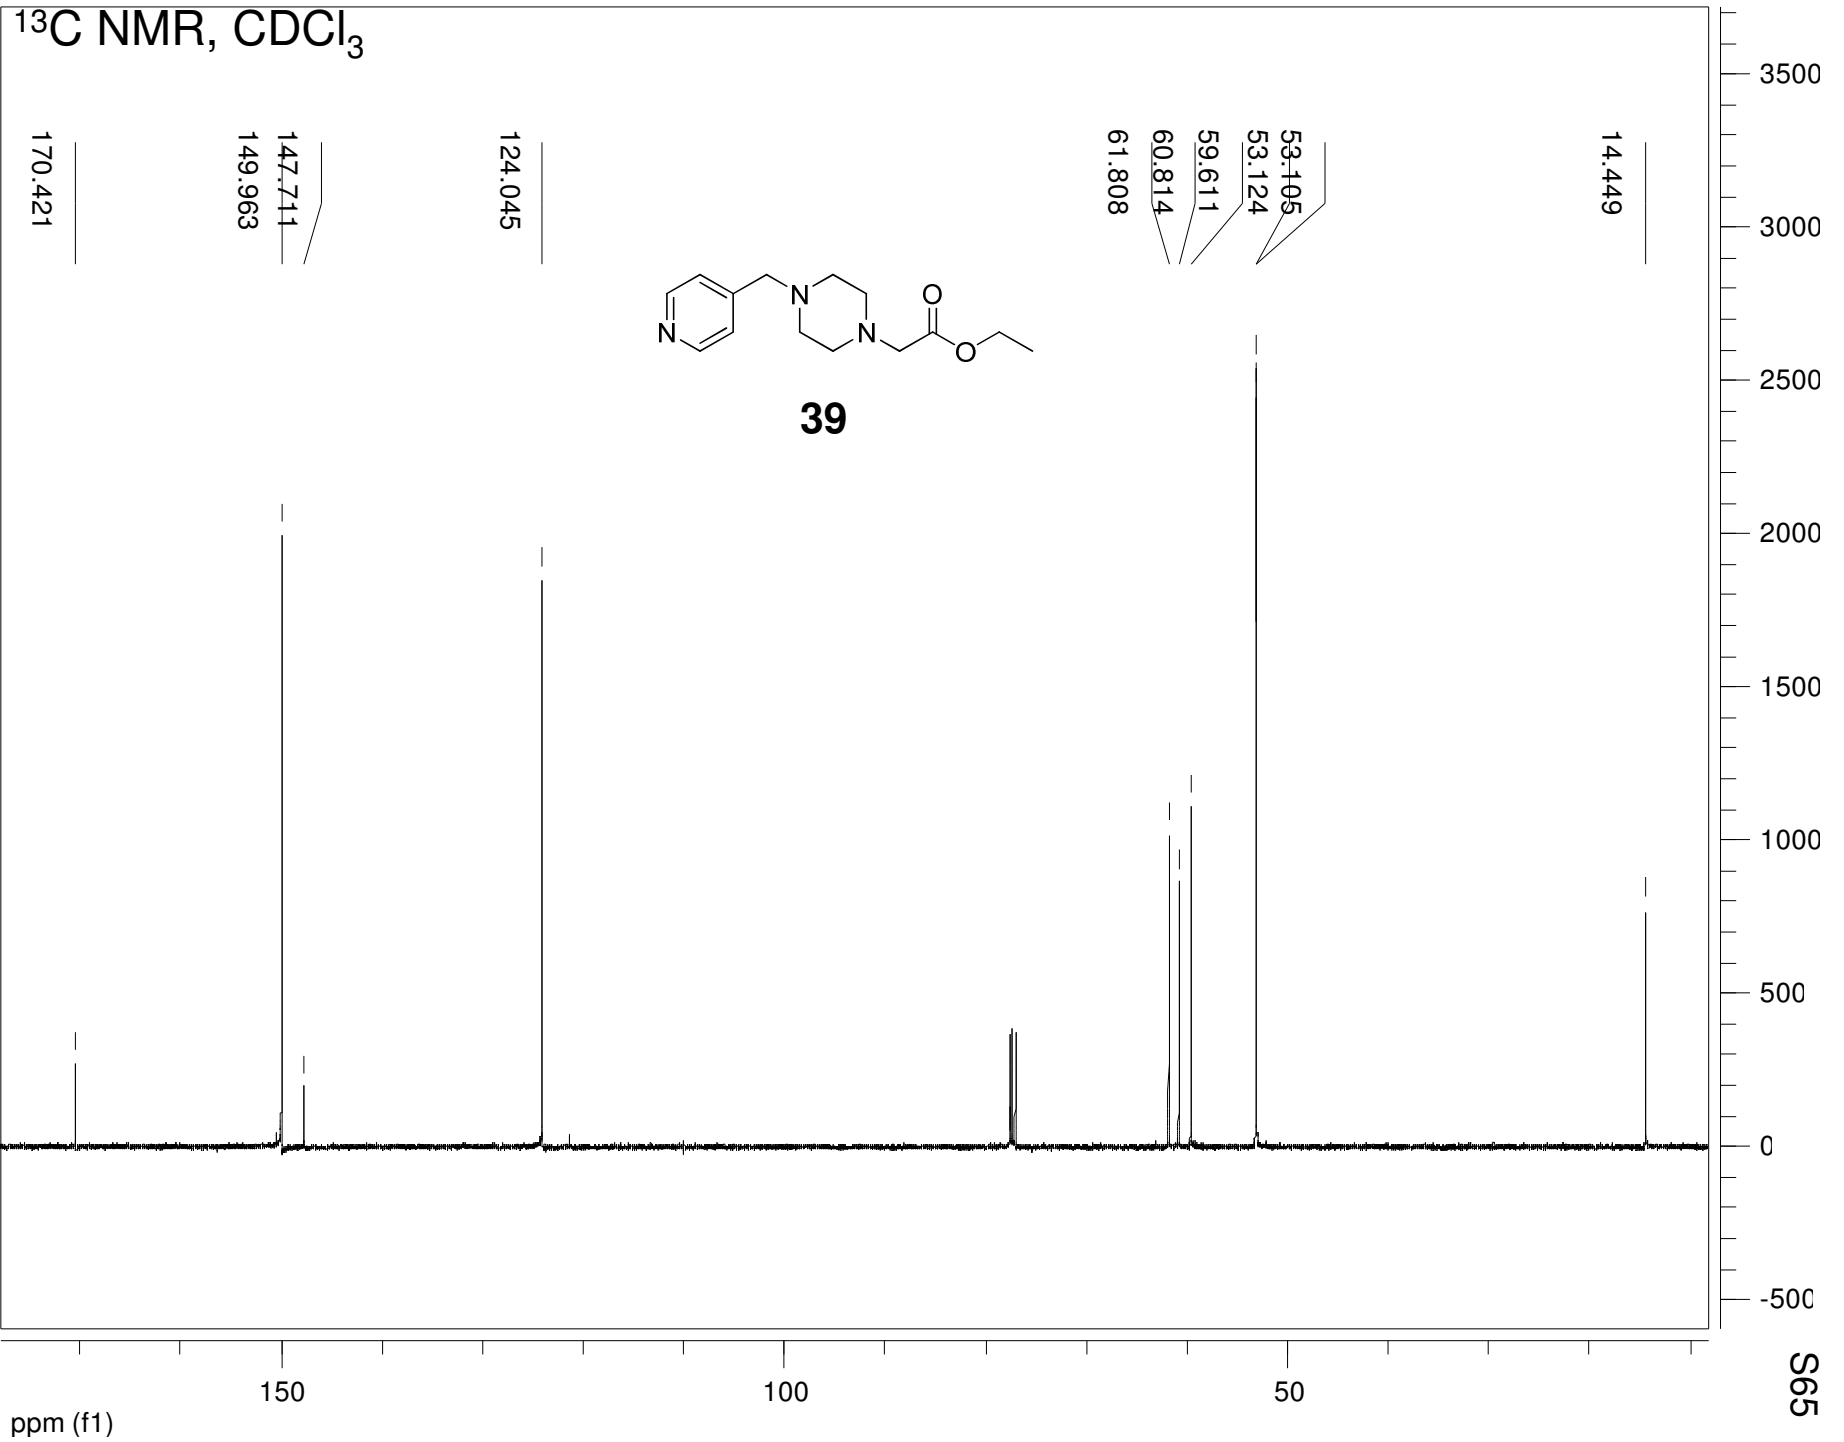

1H NMR, CDCl<sub>3</sub>

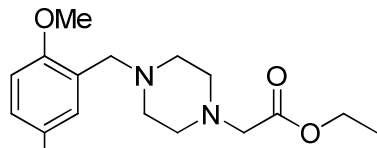

40

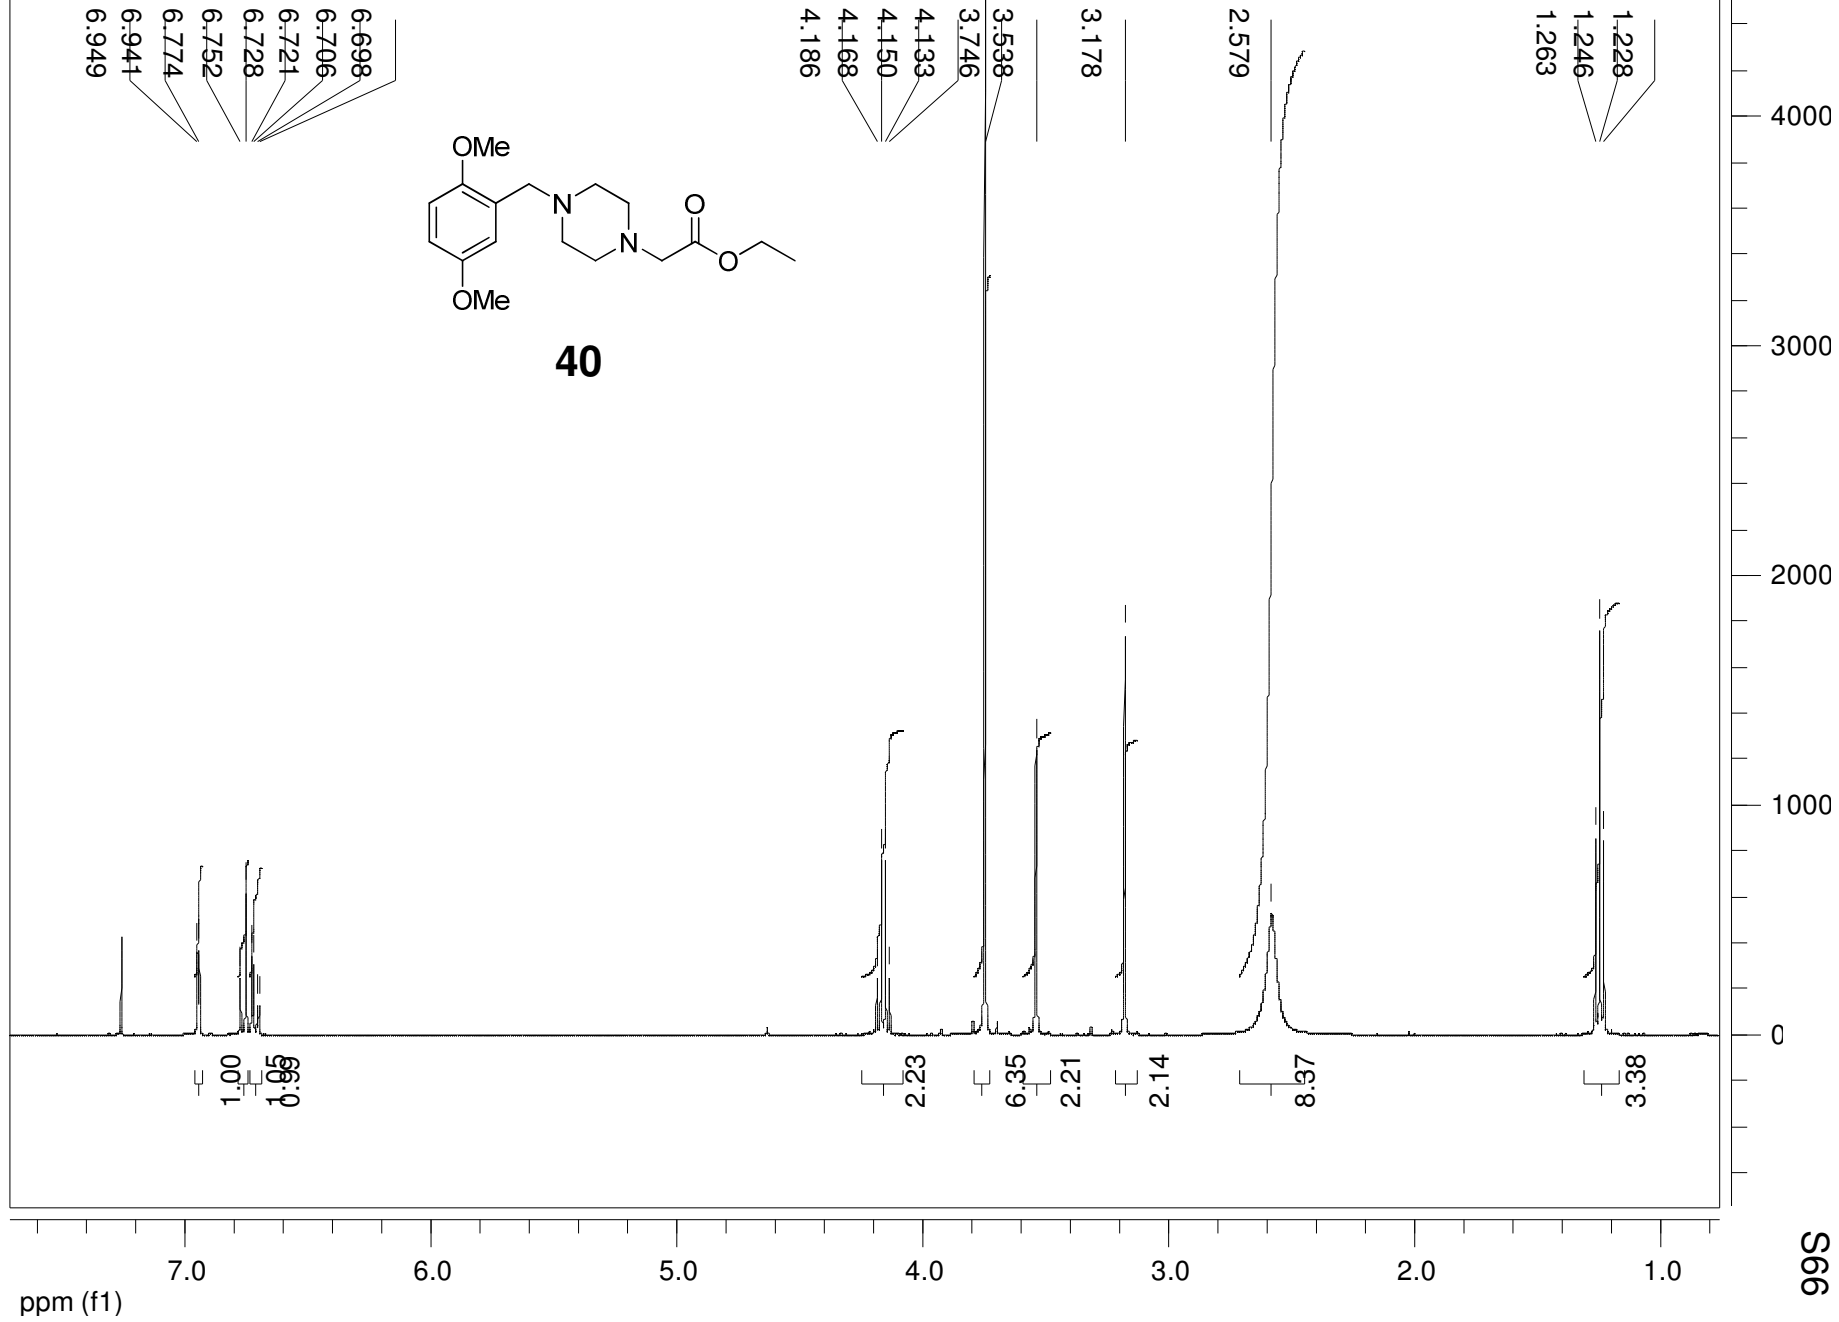

<sup>13</sup>C NMR, CDCl<sub>3</sub>

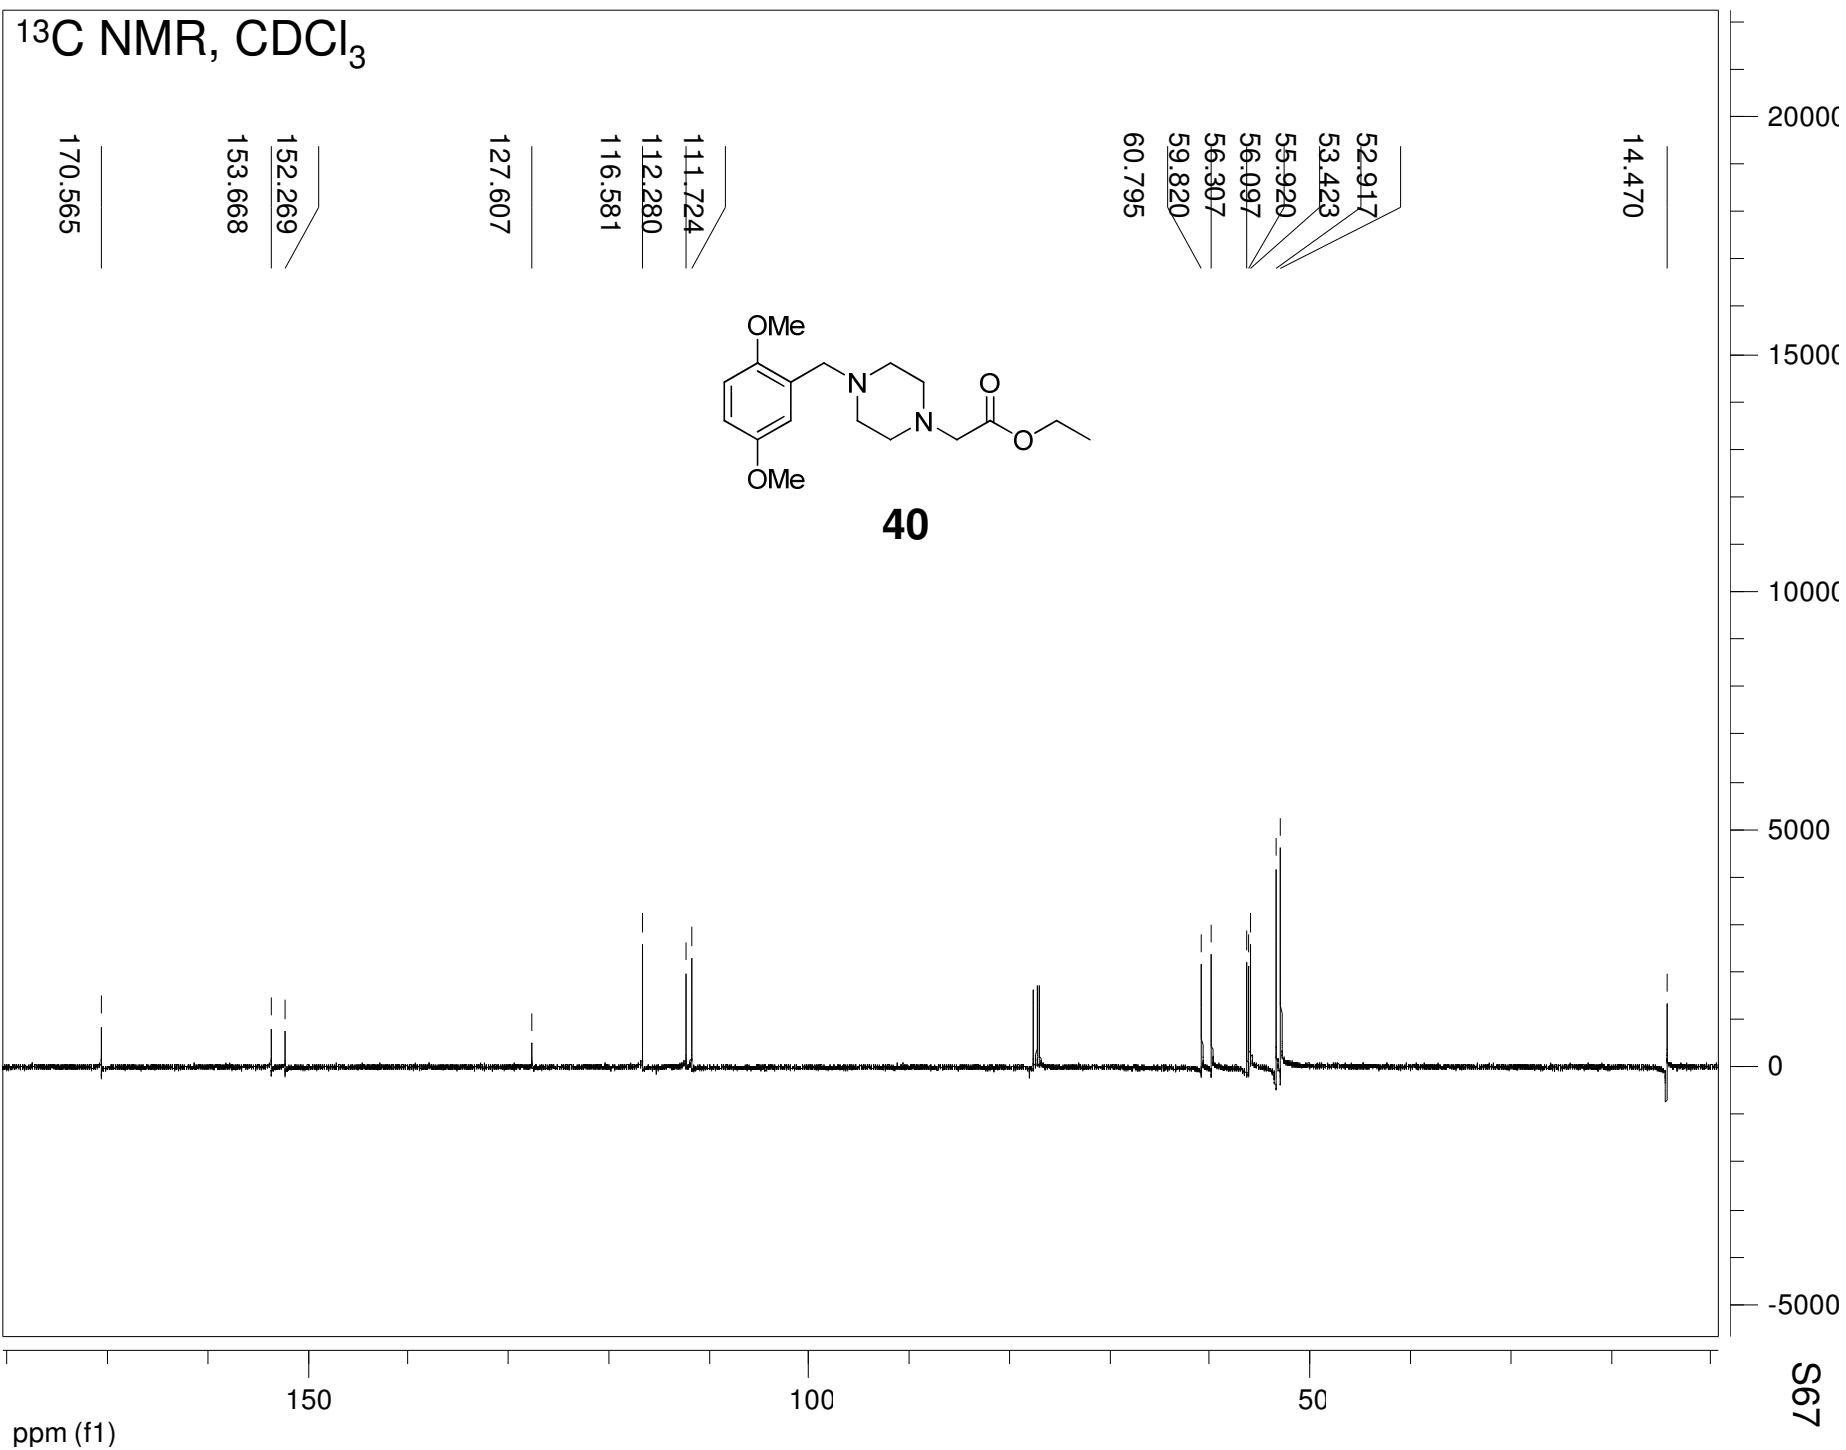

1H NMR, CDCl<sub>3</sub>

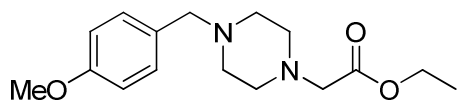

41

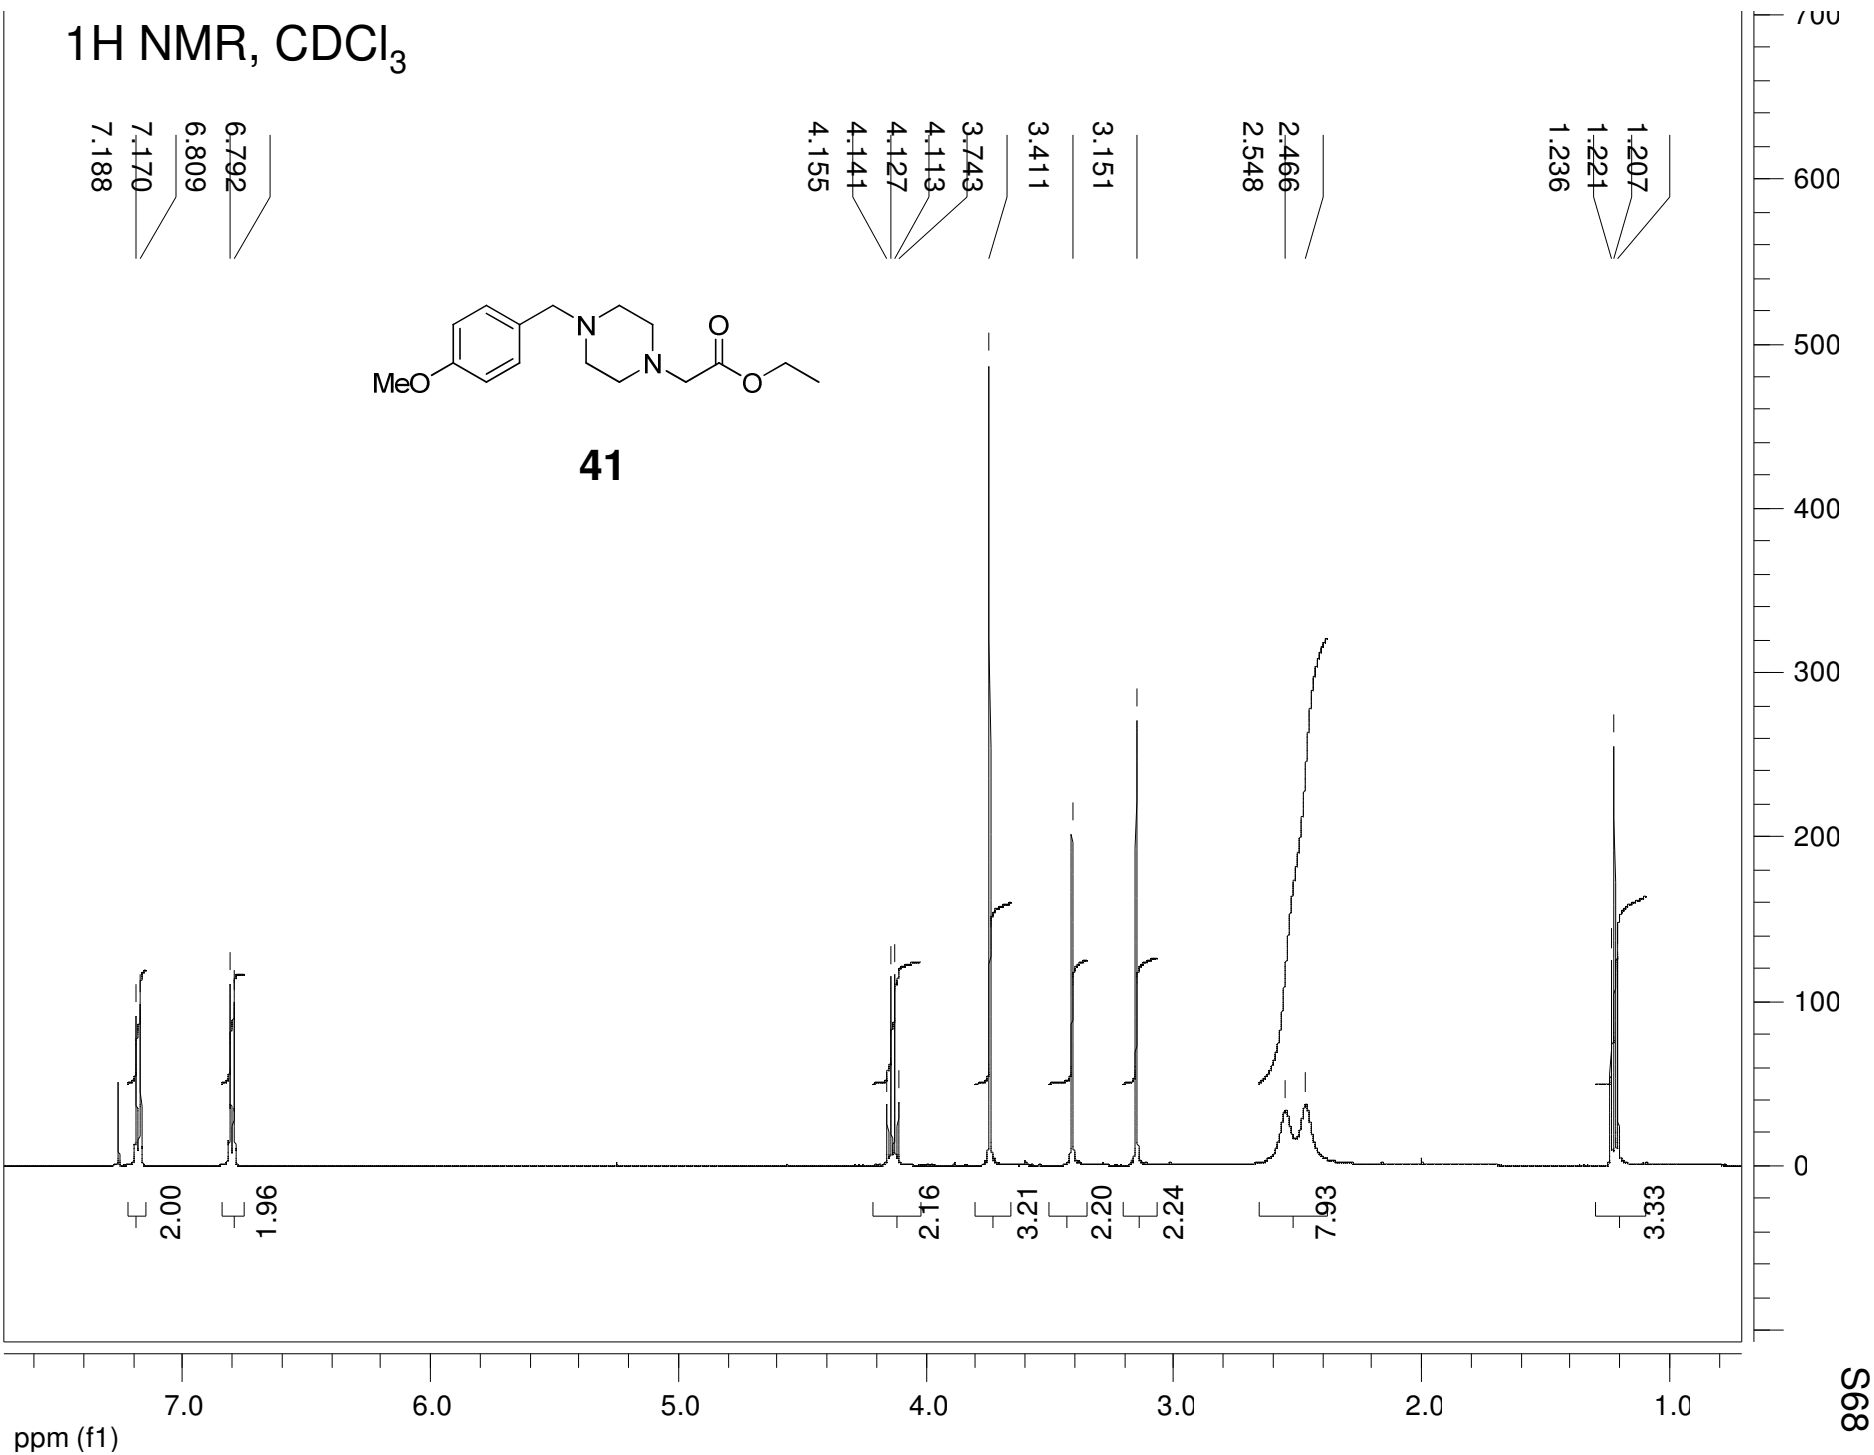



<sup>13</sup>C NMR, CDCl<sub>3</sub>

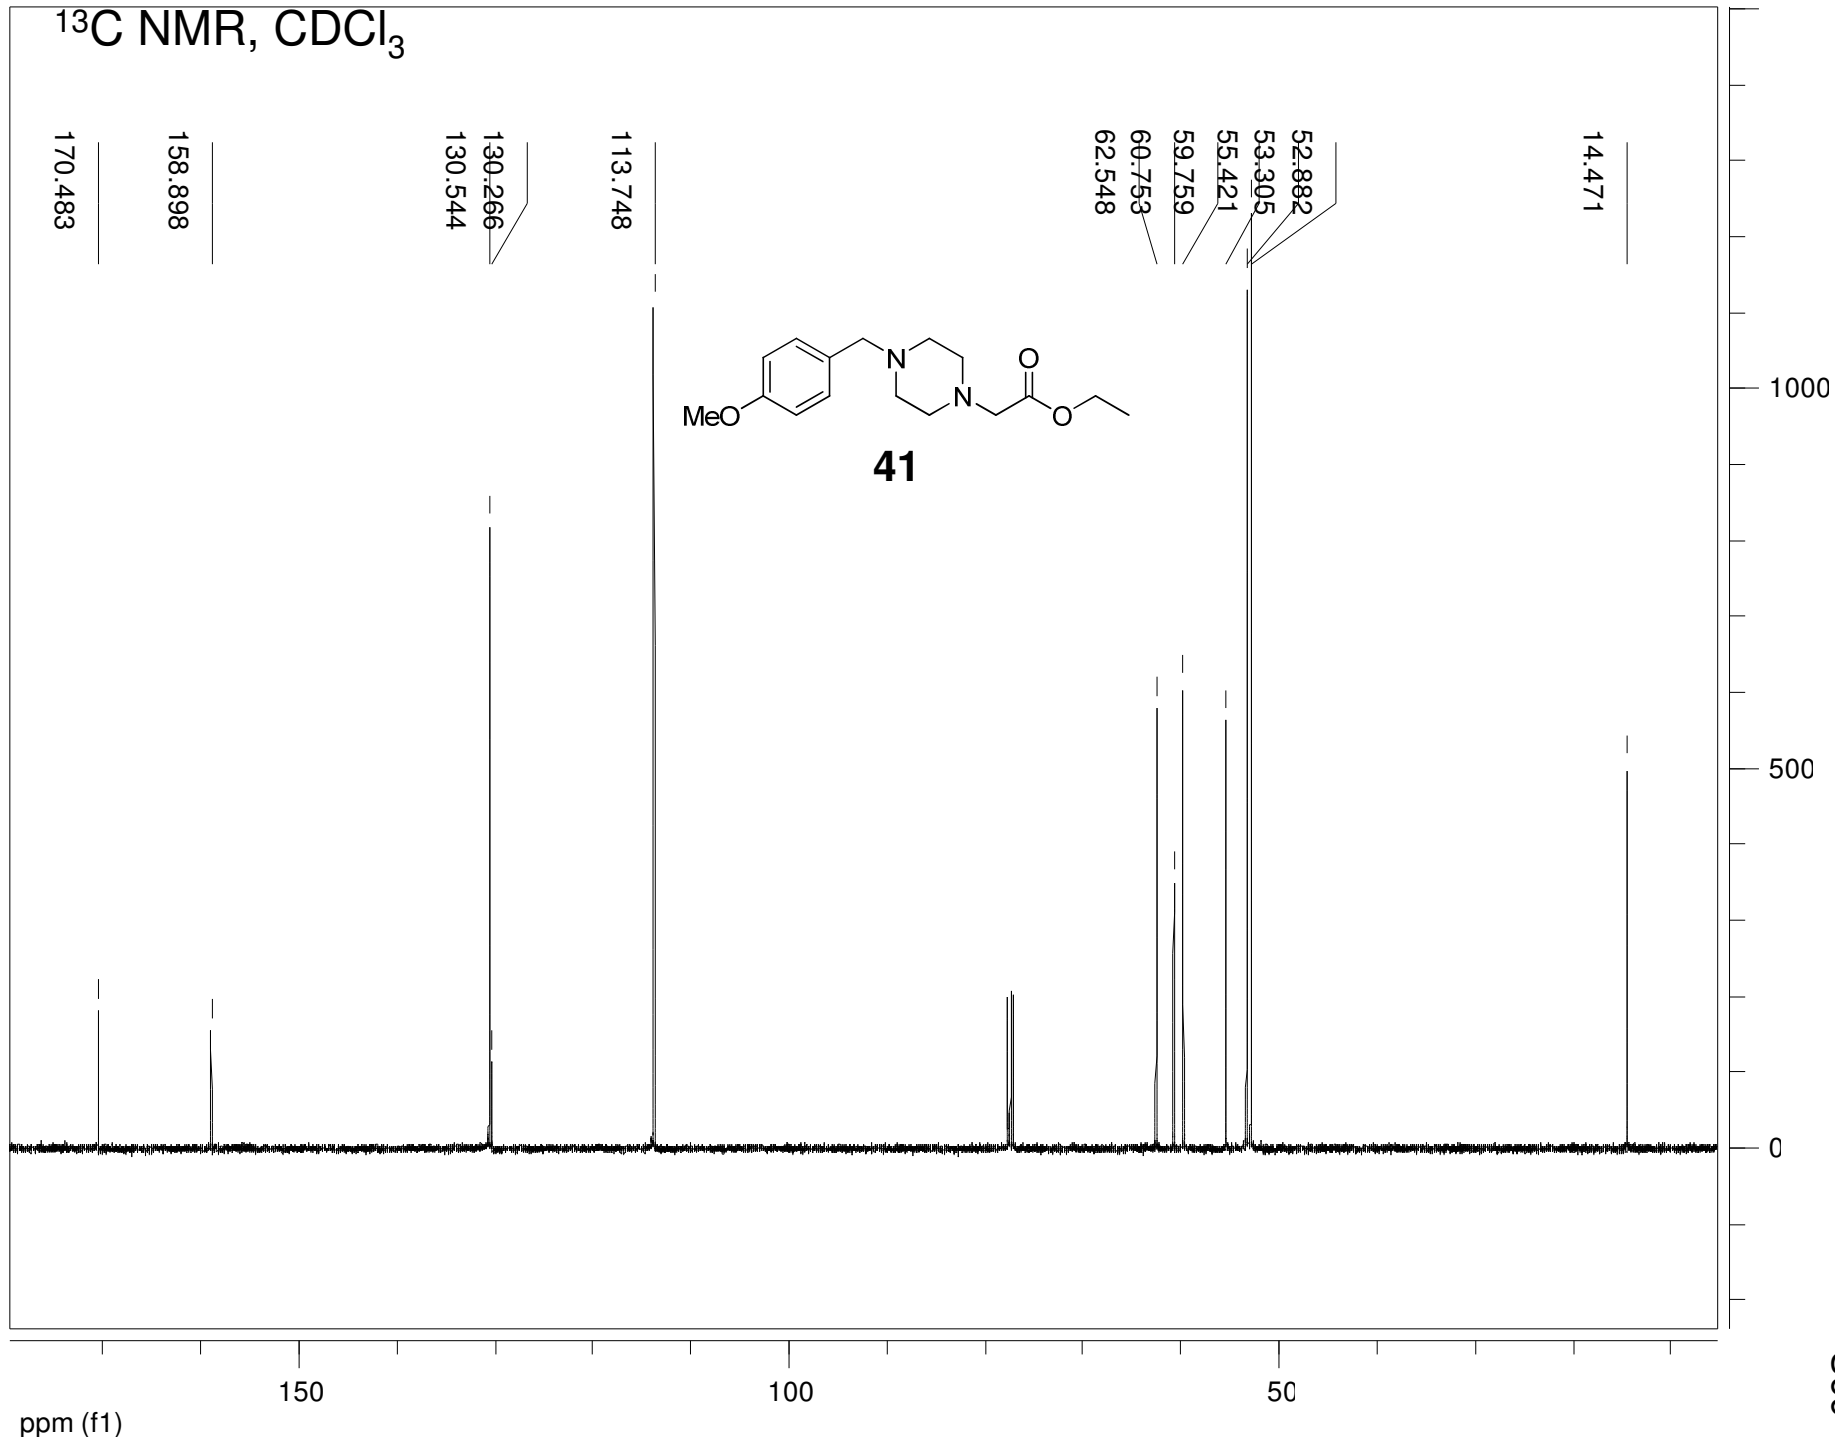

1H NMR, CDCl<sub>3</sub>

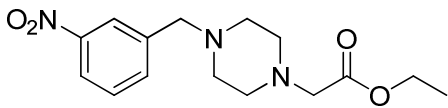

42

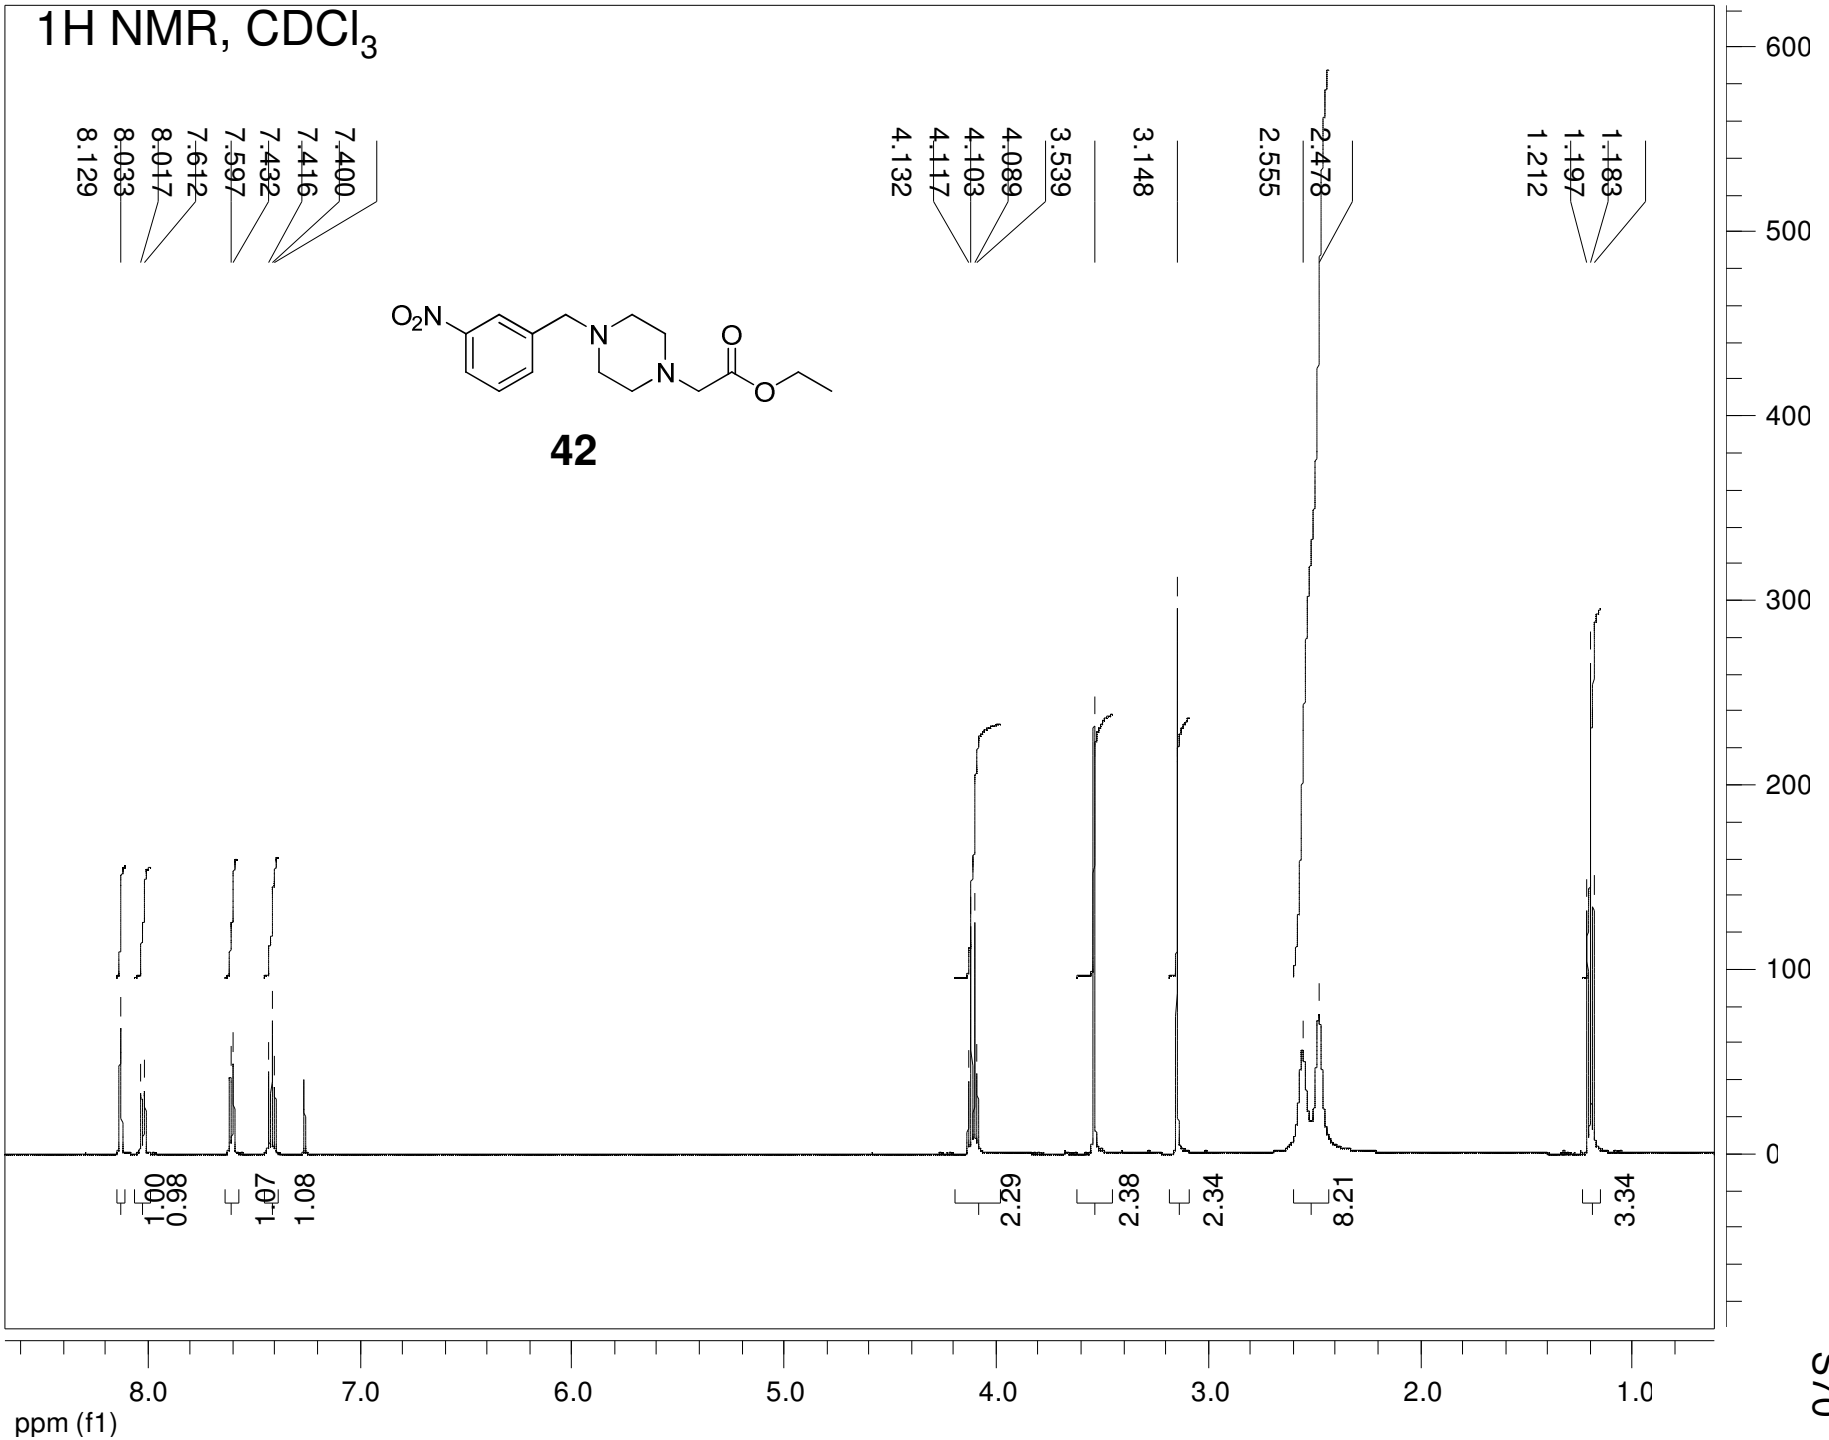

<sup>13</sup>C NMR, CDCl<sub>3</sub>

170.392

148.500

140.858

135.213

129.324

123.840

122.335

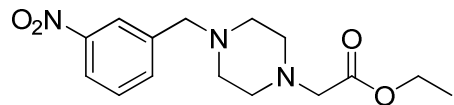

**42**

62.058

60.776

59.562

53.094

52.955

14.429

ppm (f1)

150

100

50

S71

1000  
500  
0

# 1H NMR, CD<sub>3</sub>OD

8.481  
7.846  
7.843  
7.831  
7.827  
7.816  
7.812  
7.549  
7.533  
7.342  
7.332  
7.330  
7.327  
7.317

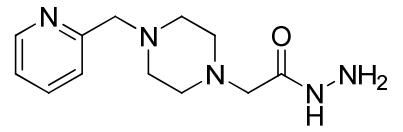

**6**

3.684  
3.056  
2.580

1.00  
0.06  
0.63  
1.10  
2.09  
6.81  
8.87

ppm (f1)

1500  
1000  
500  
0

$^{13}\text{C}$  NMR,  $\text{CD}_3\text{OD}$

I-229-C-0919

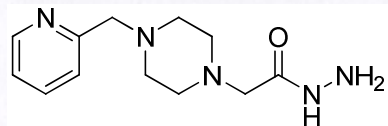

**6**

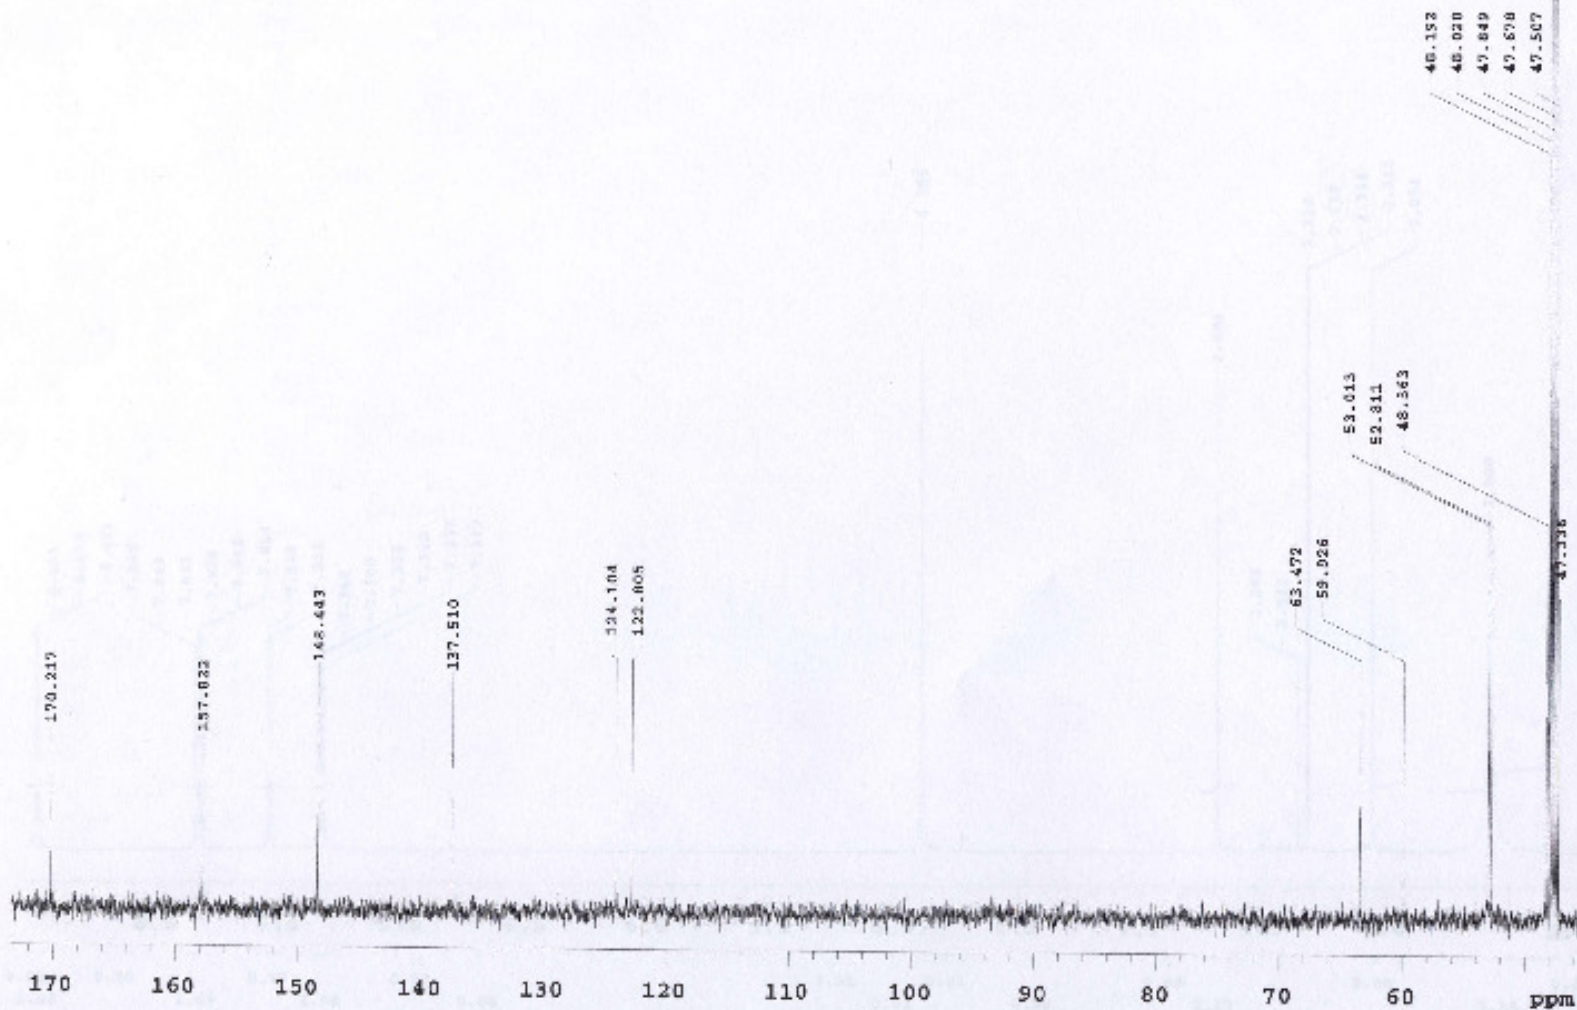

<sup>1</sup>H NMR, CD<sub>3</sub>OD

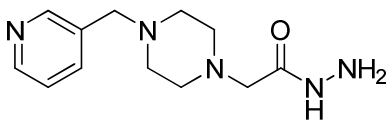

**7**

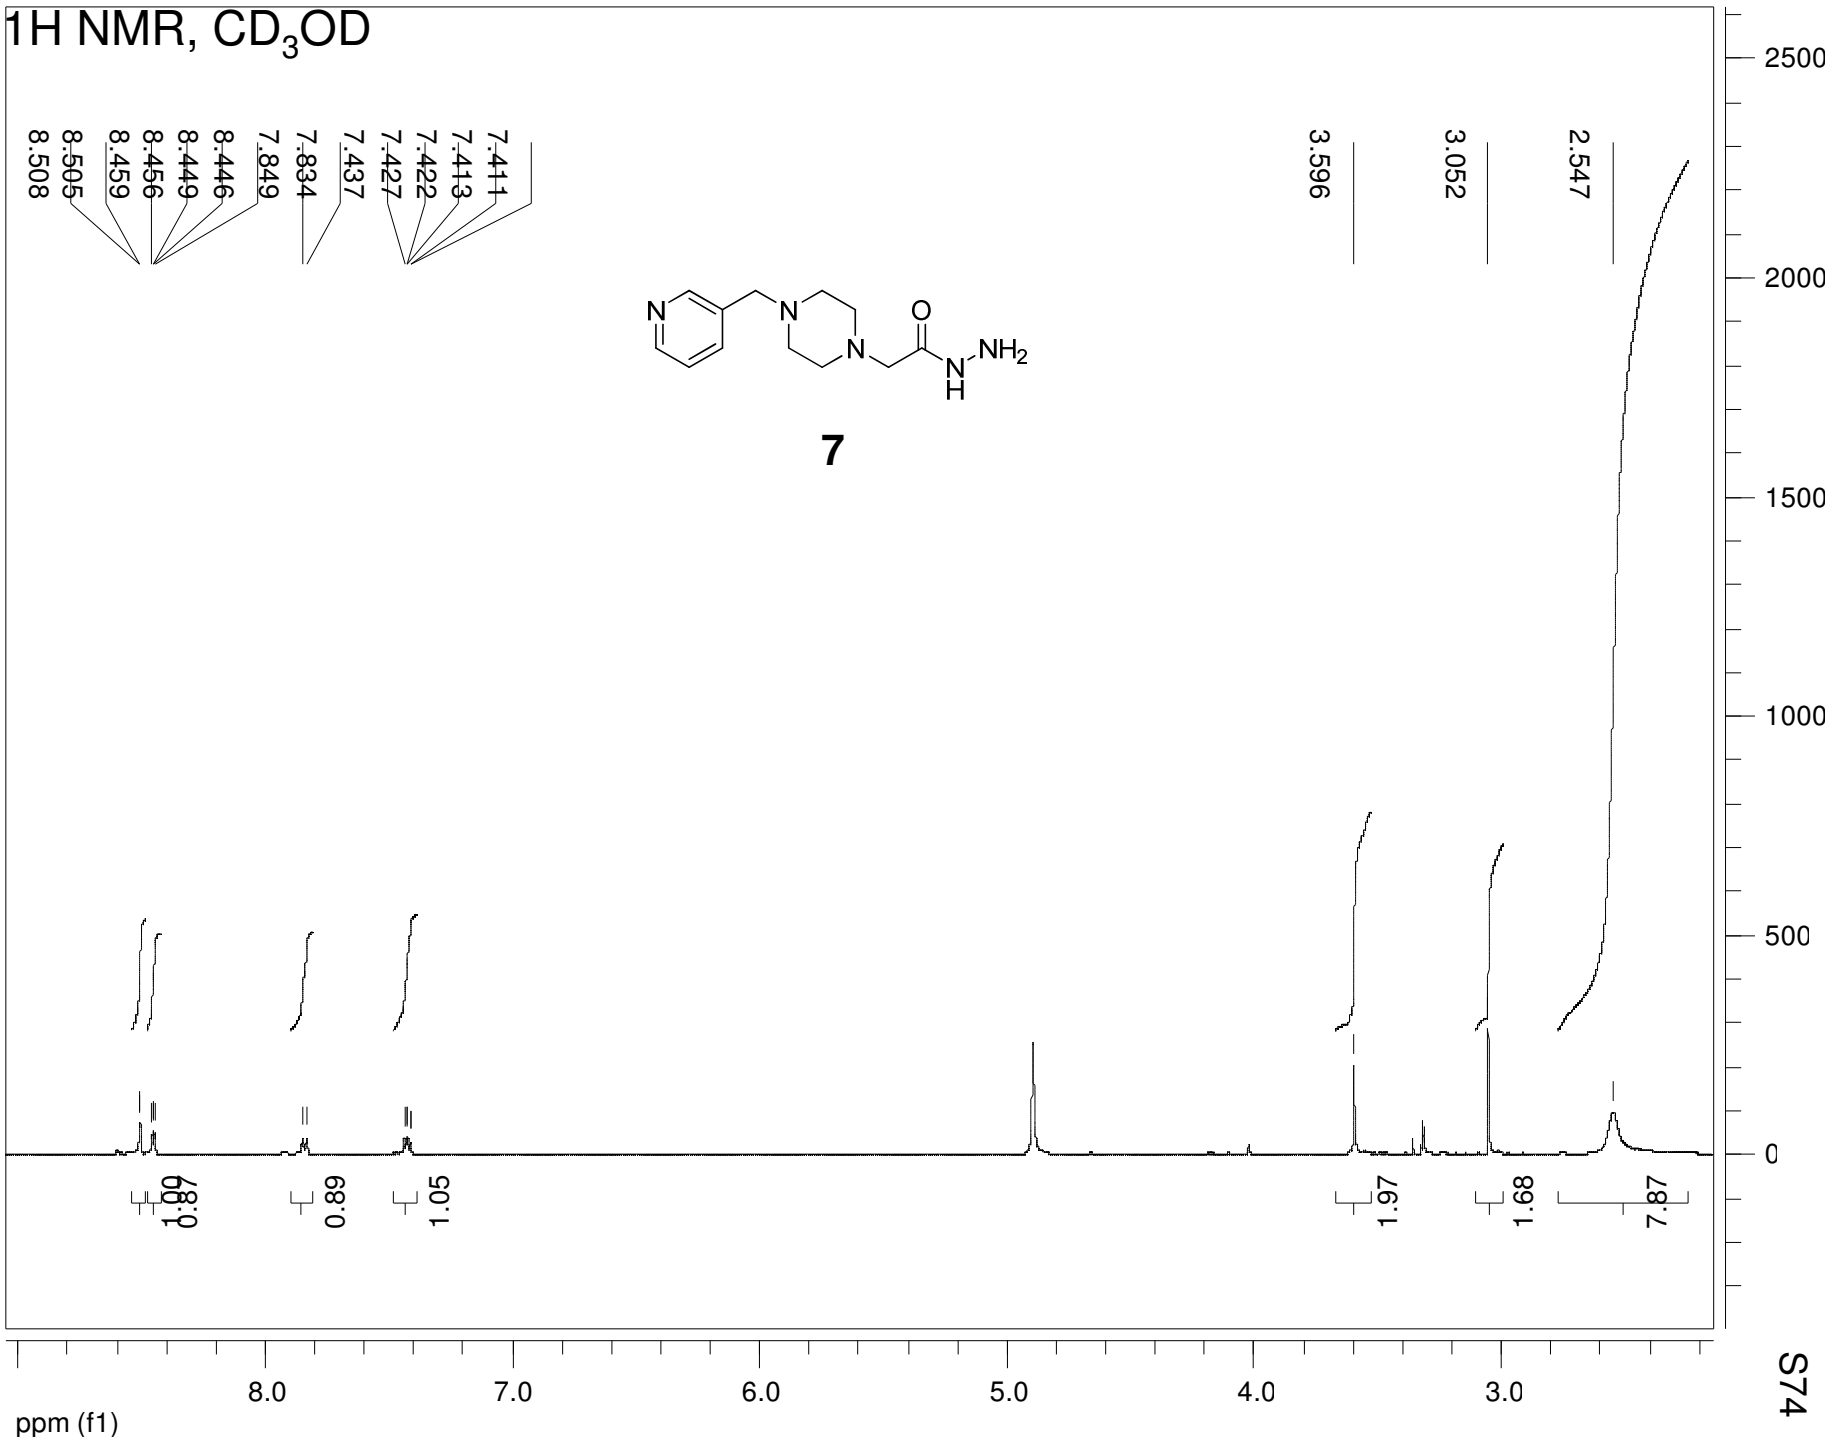

<sup>13</sup>C NMR, CD<sub>3</sub>OD

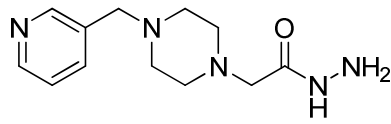

7

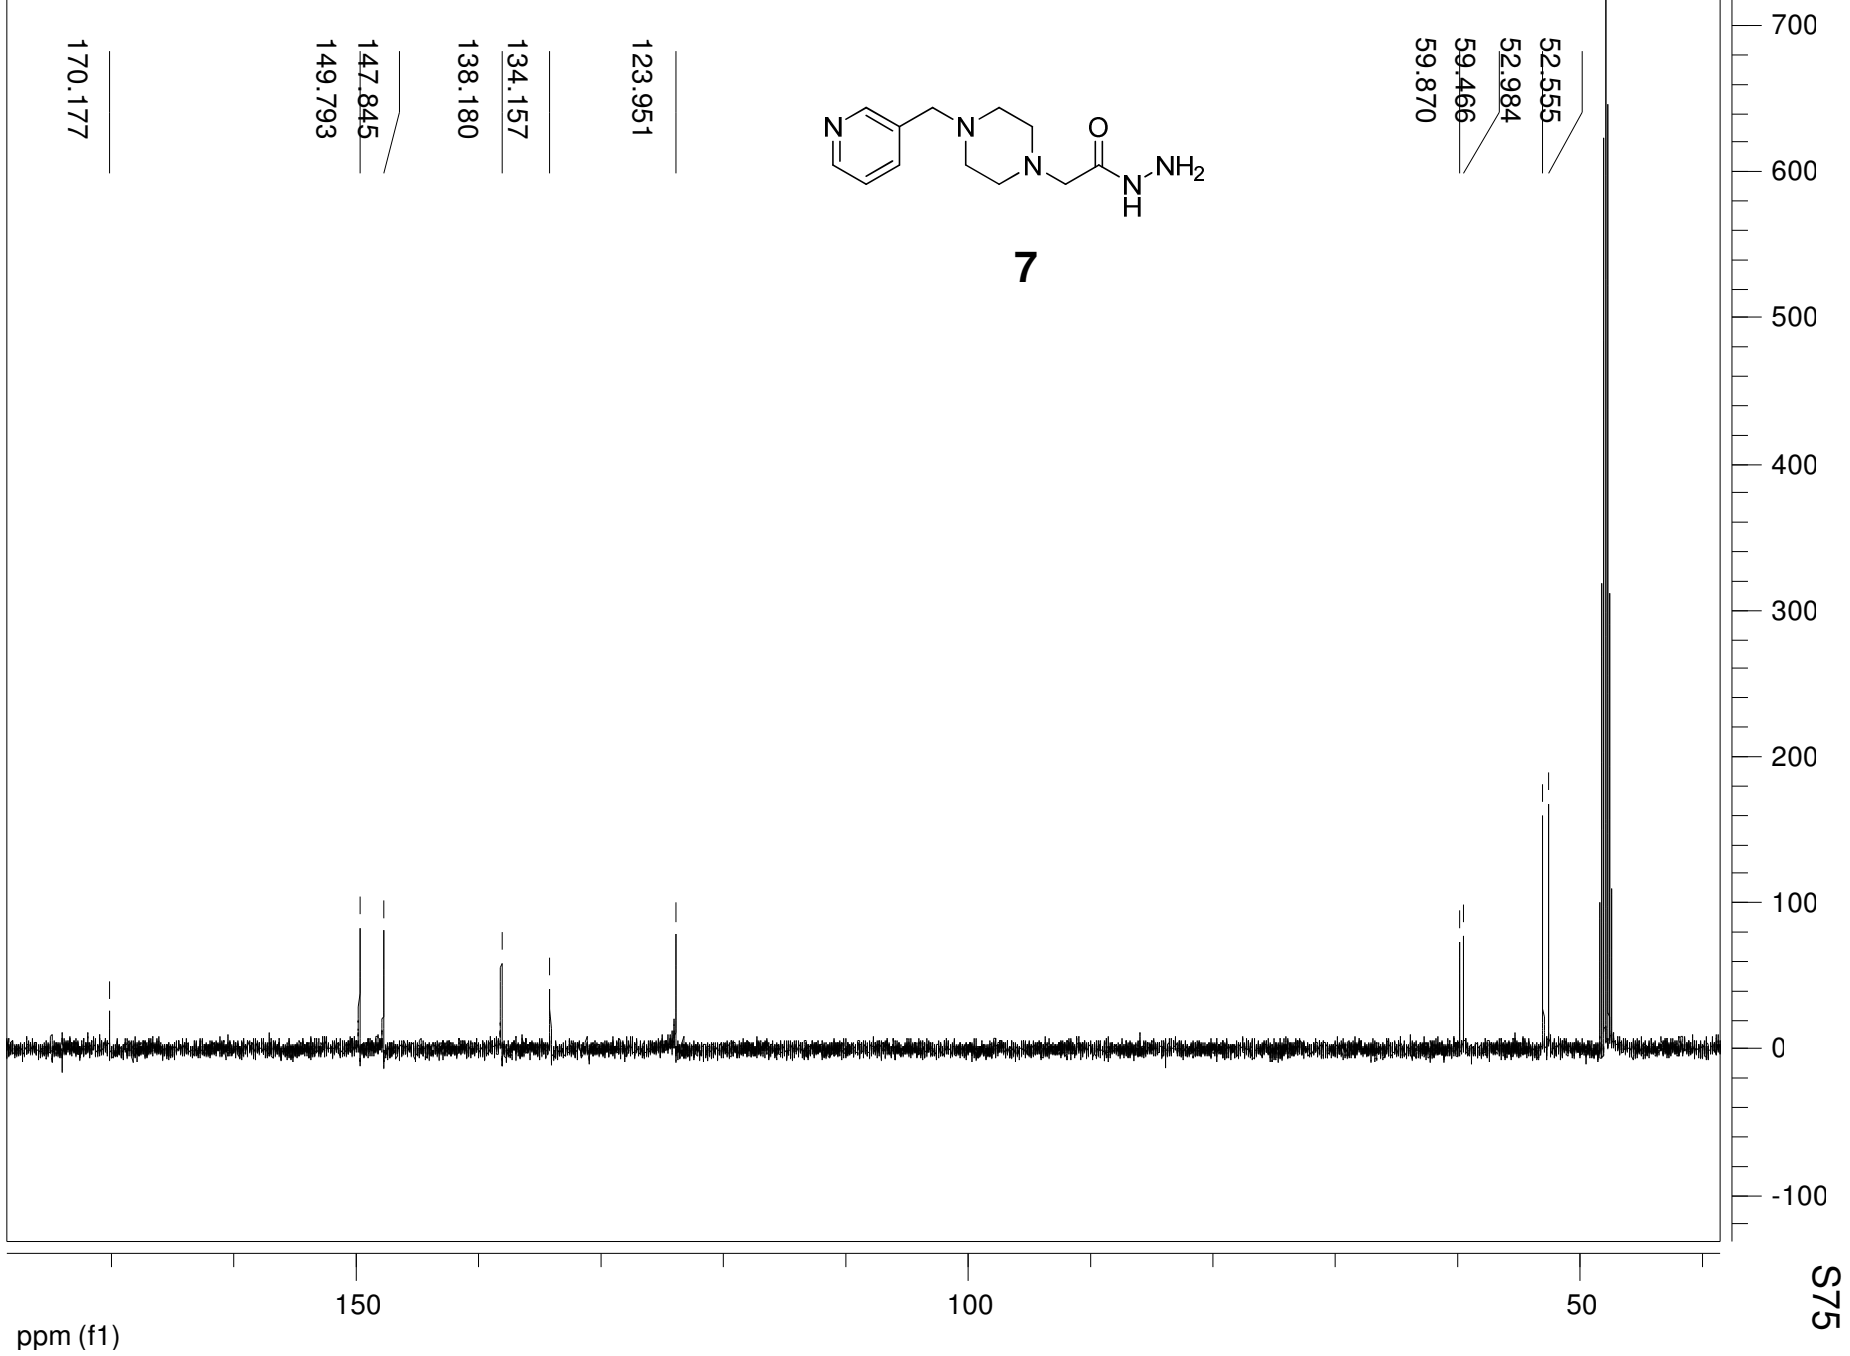

1H NMR, CD<sub>3</sub>OD

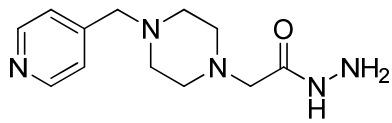

8

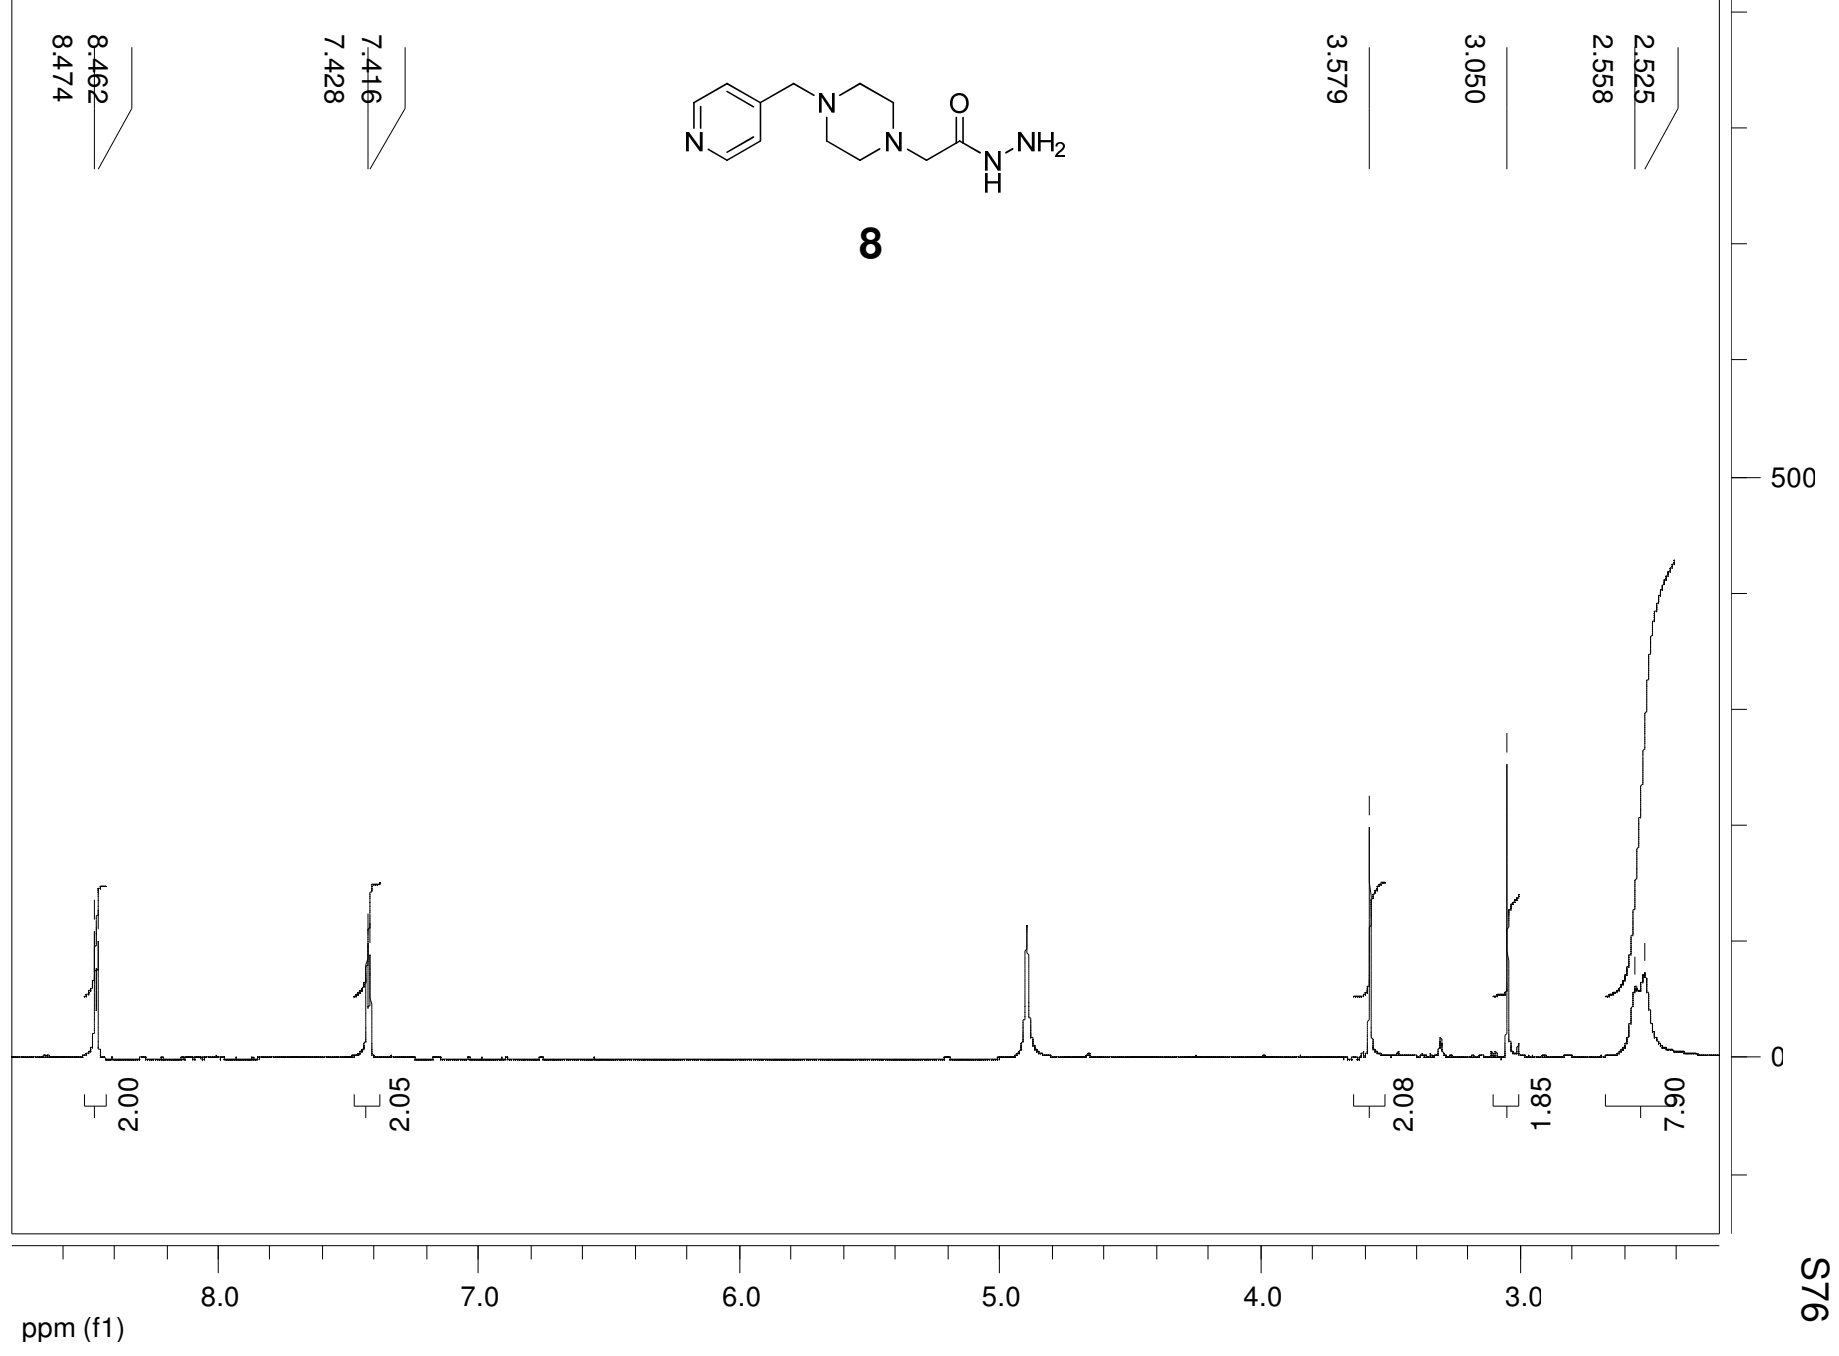



<sup>13</sup>C NMR, CD<sub>3</sub>OD

170.150

148.865  
148.892

124.612

61.105  
59.914  
53.066  
52.741

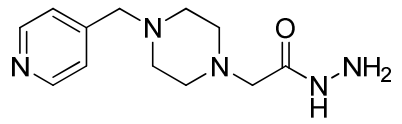

**8**

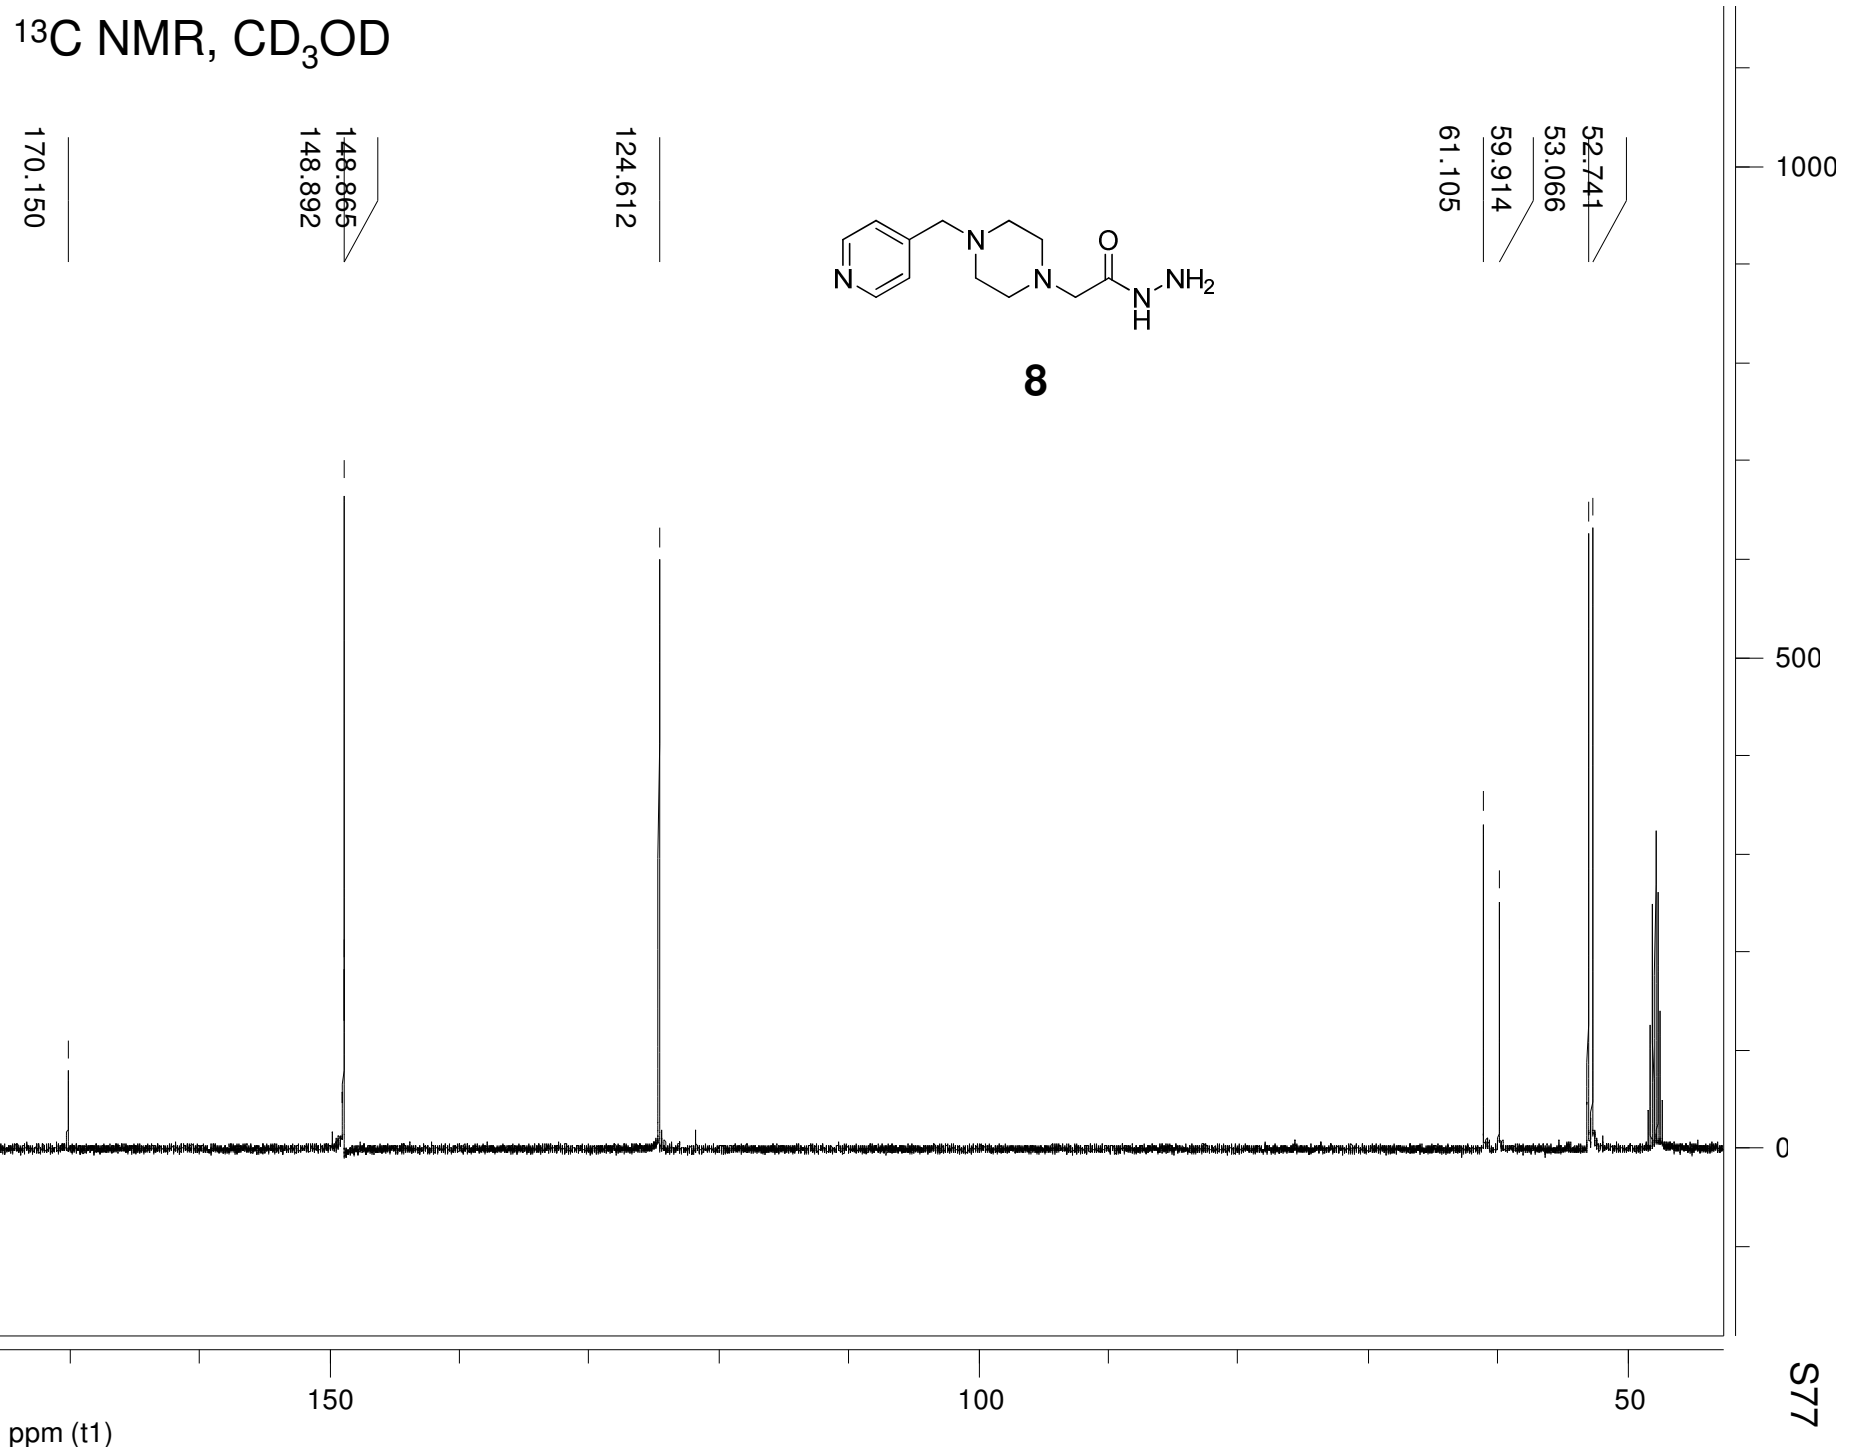

ppm (t1)

150

100

50

S77

1H NMR, CDCl<sub>3</sub>

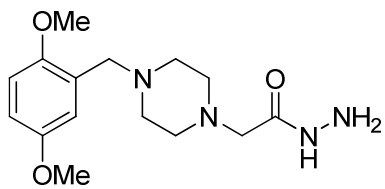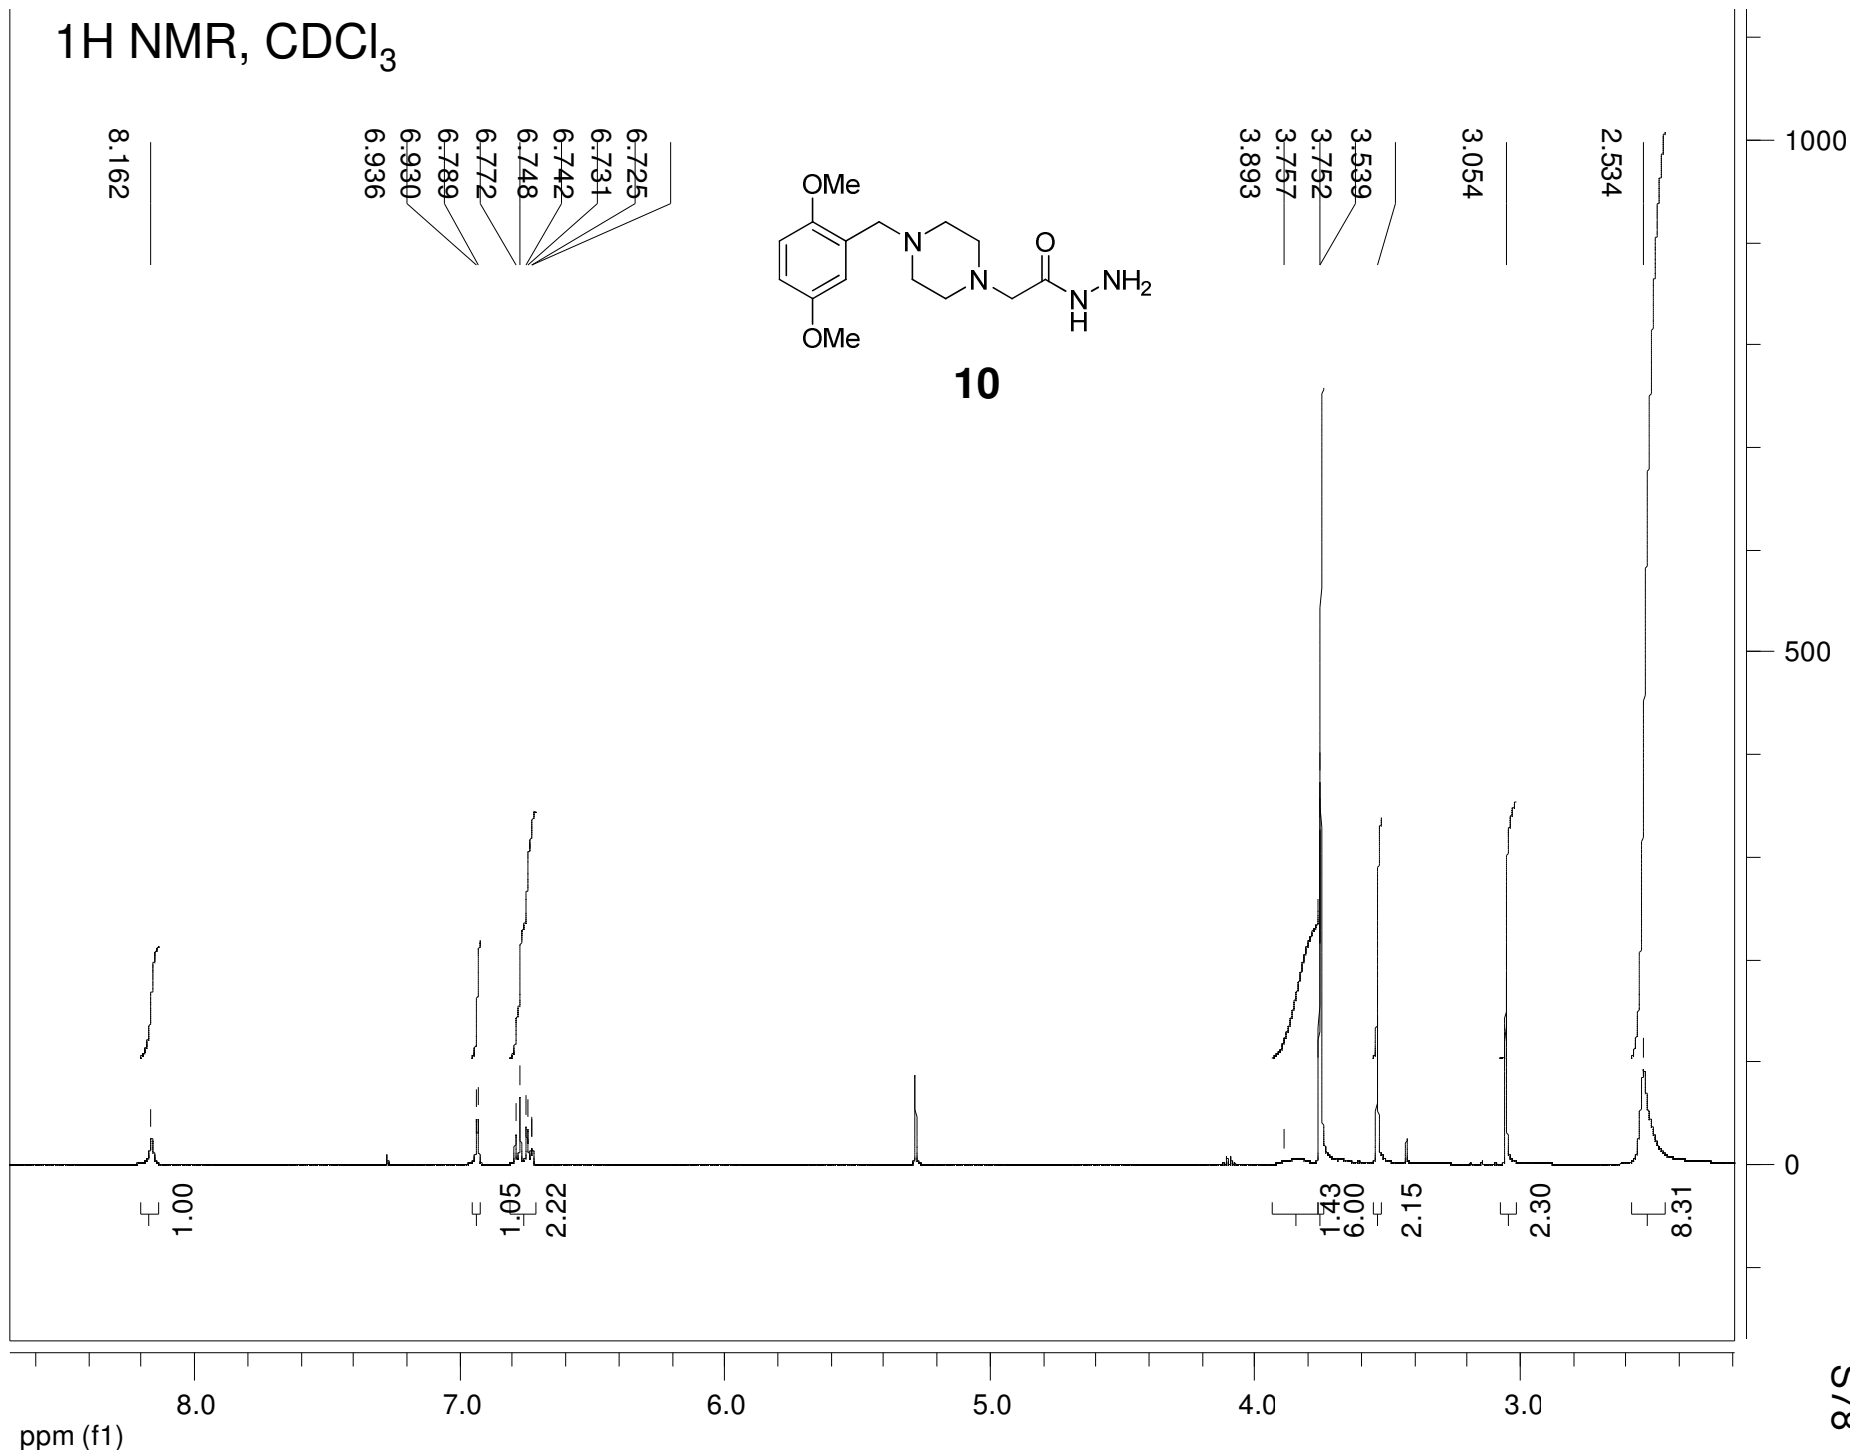

<sup>13</sup>C NMR, CDCl<sub>3</sub>

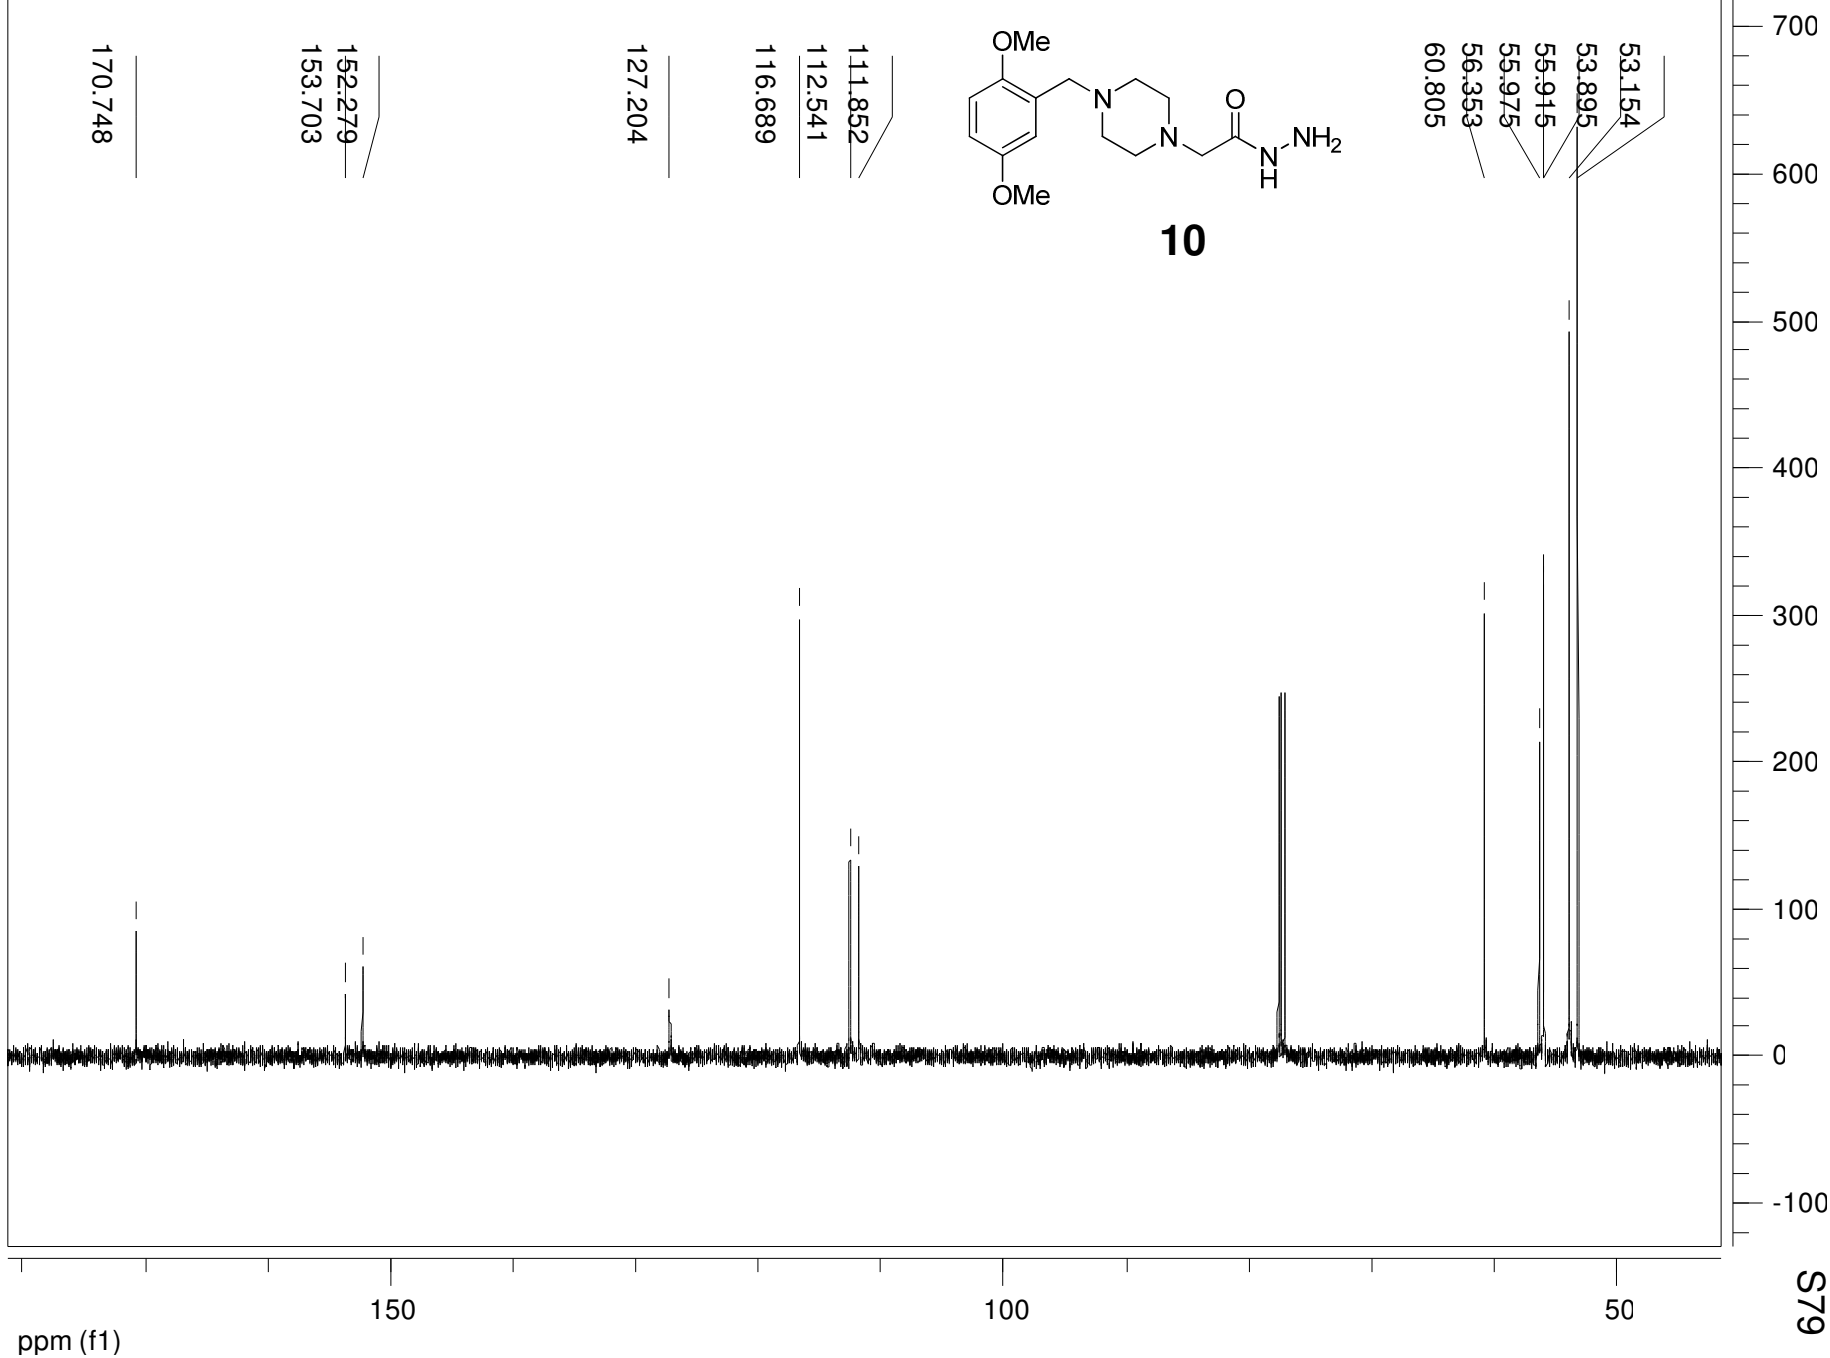

1H NMR, CDCl<sub>3</sub>

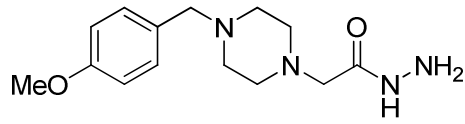

**11**

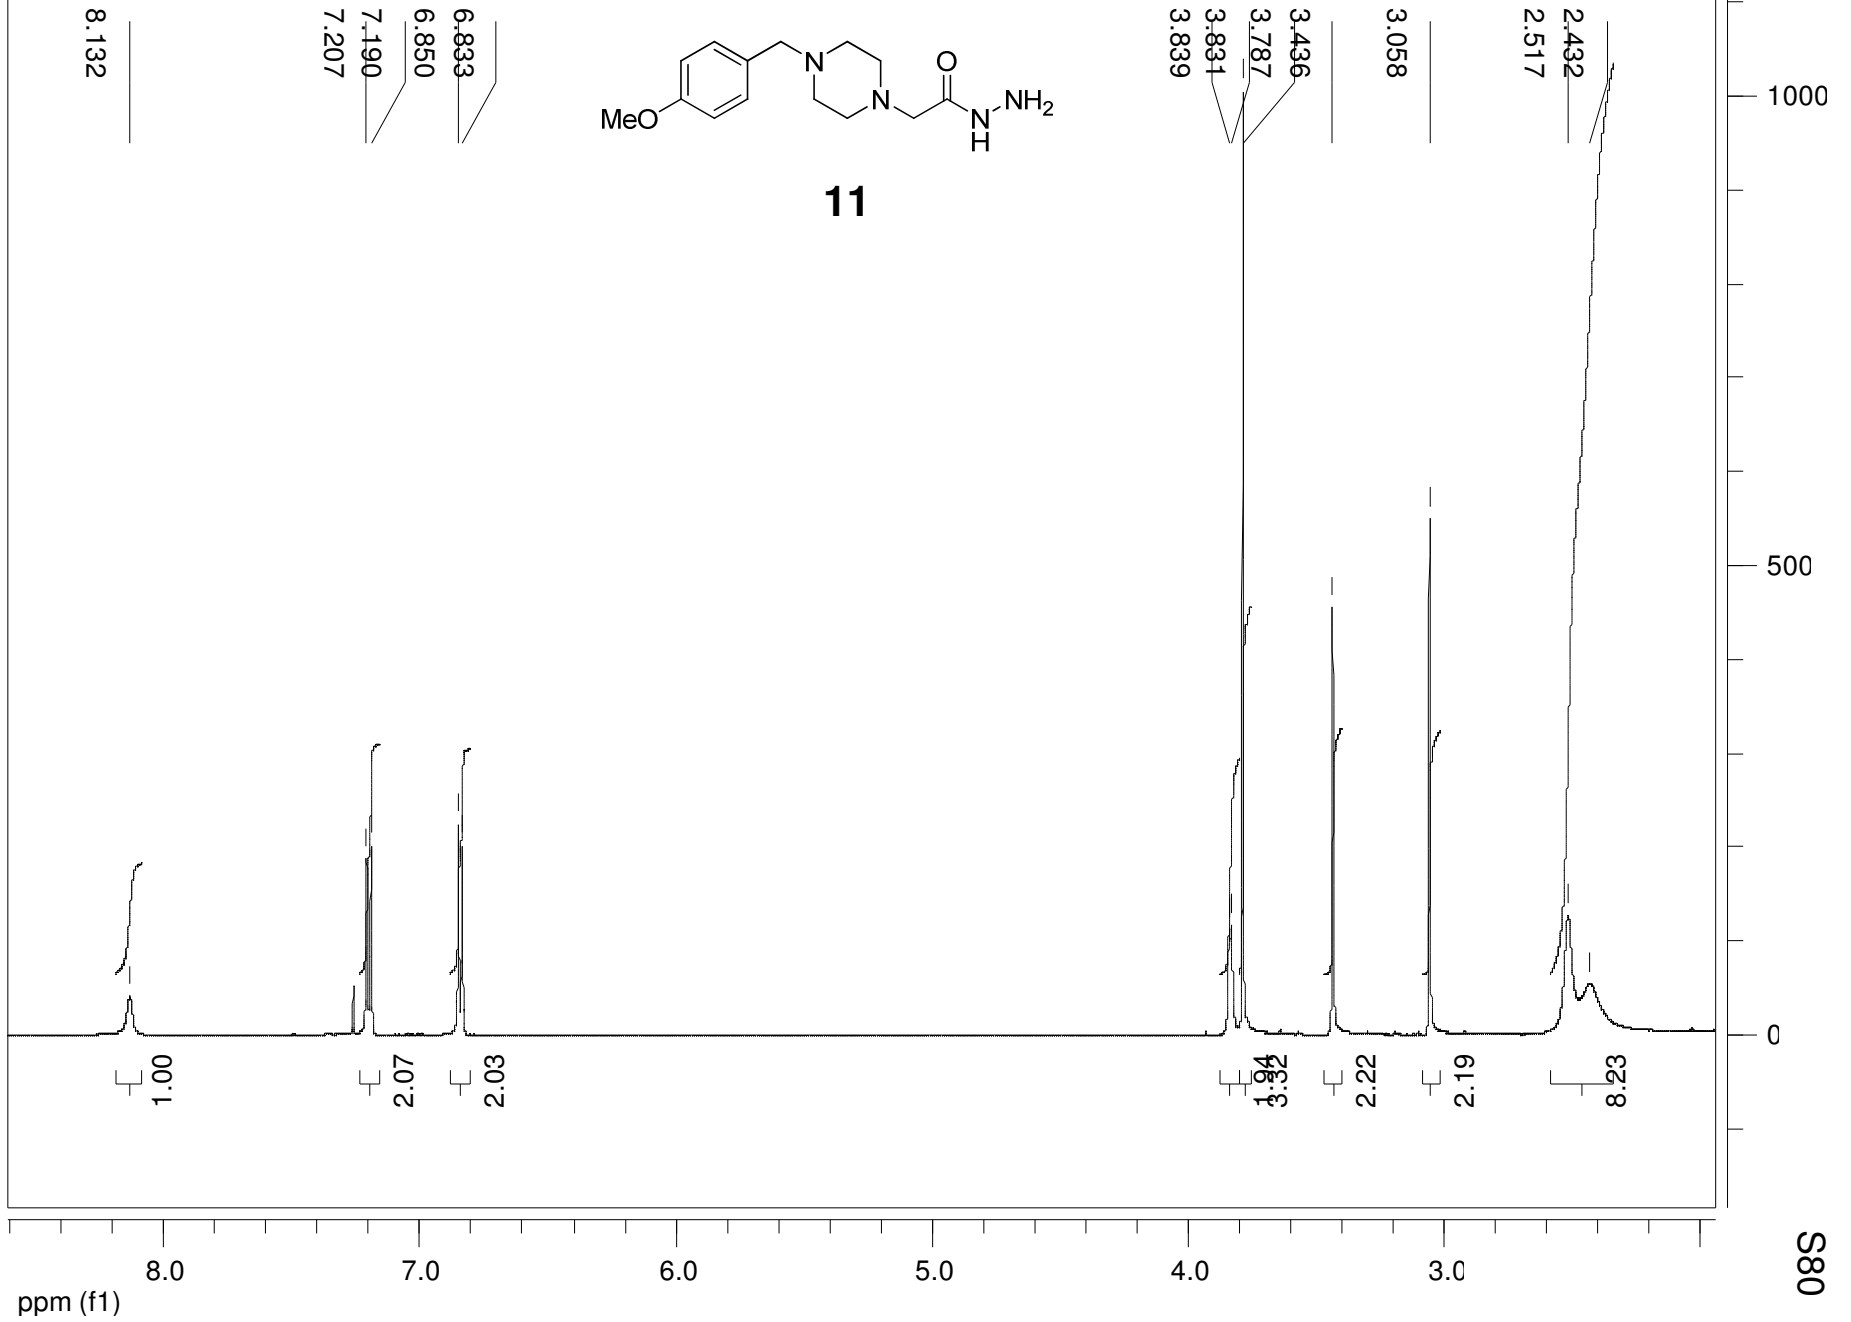

<sup>13</sup>C NMR, CDCl<sub>3</sub>

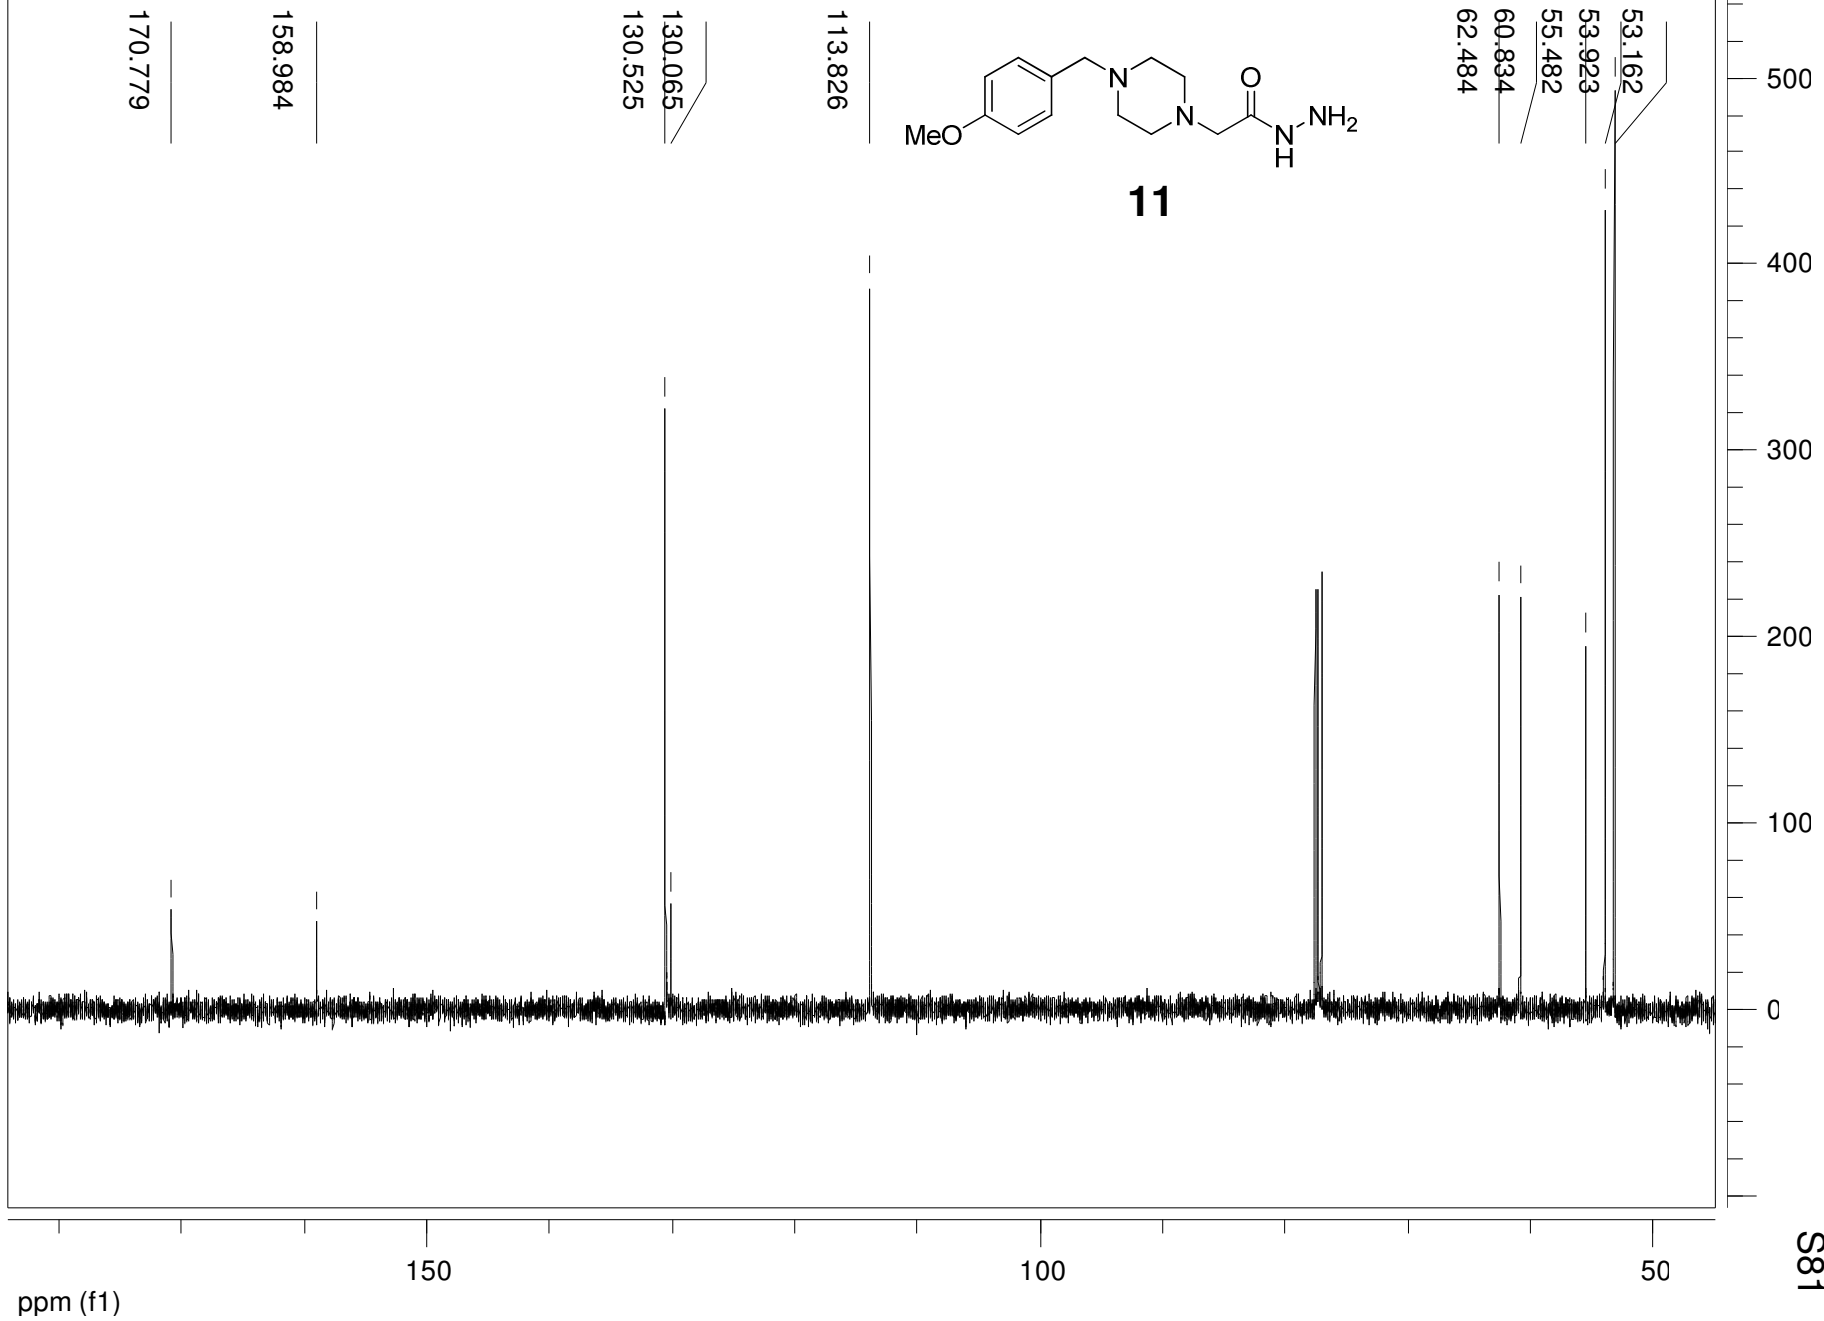

1H NMR, CDCl<sub>3</sub>

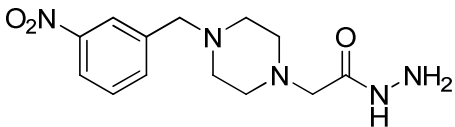

12

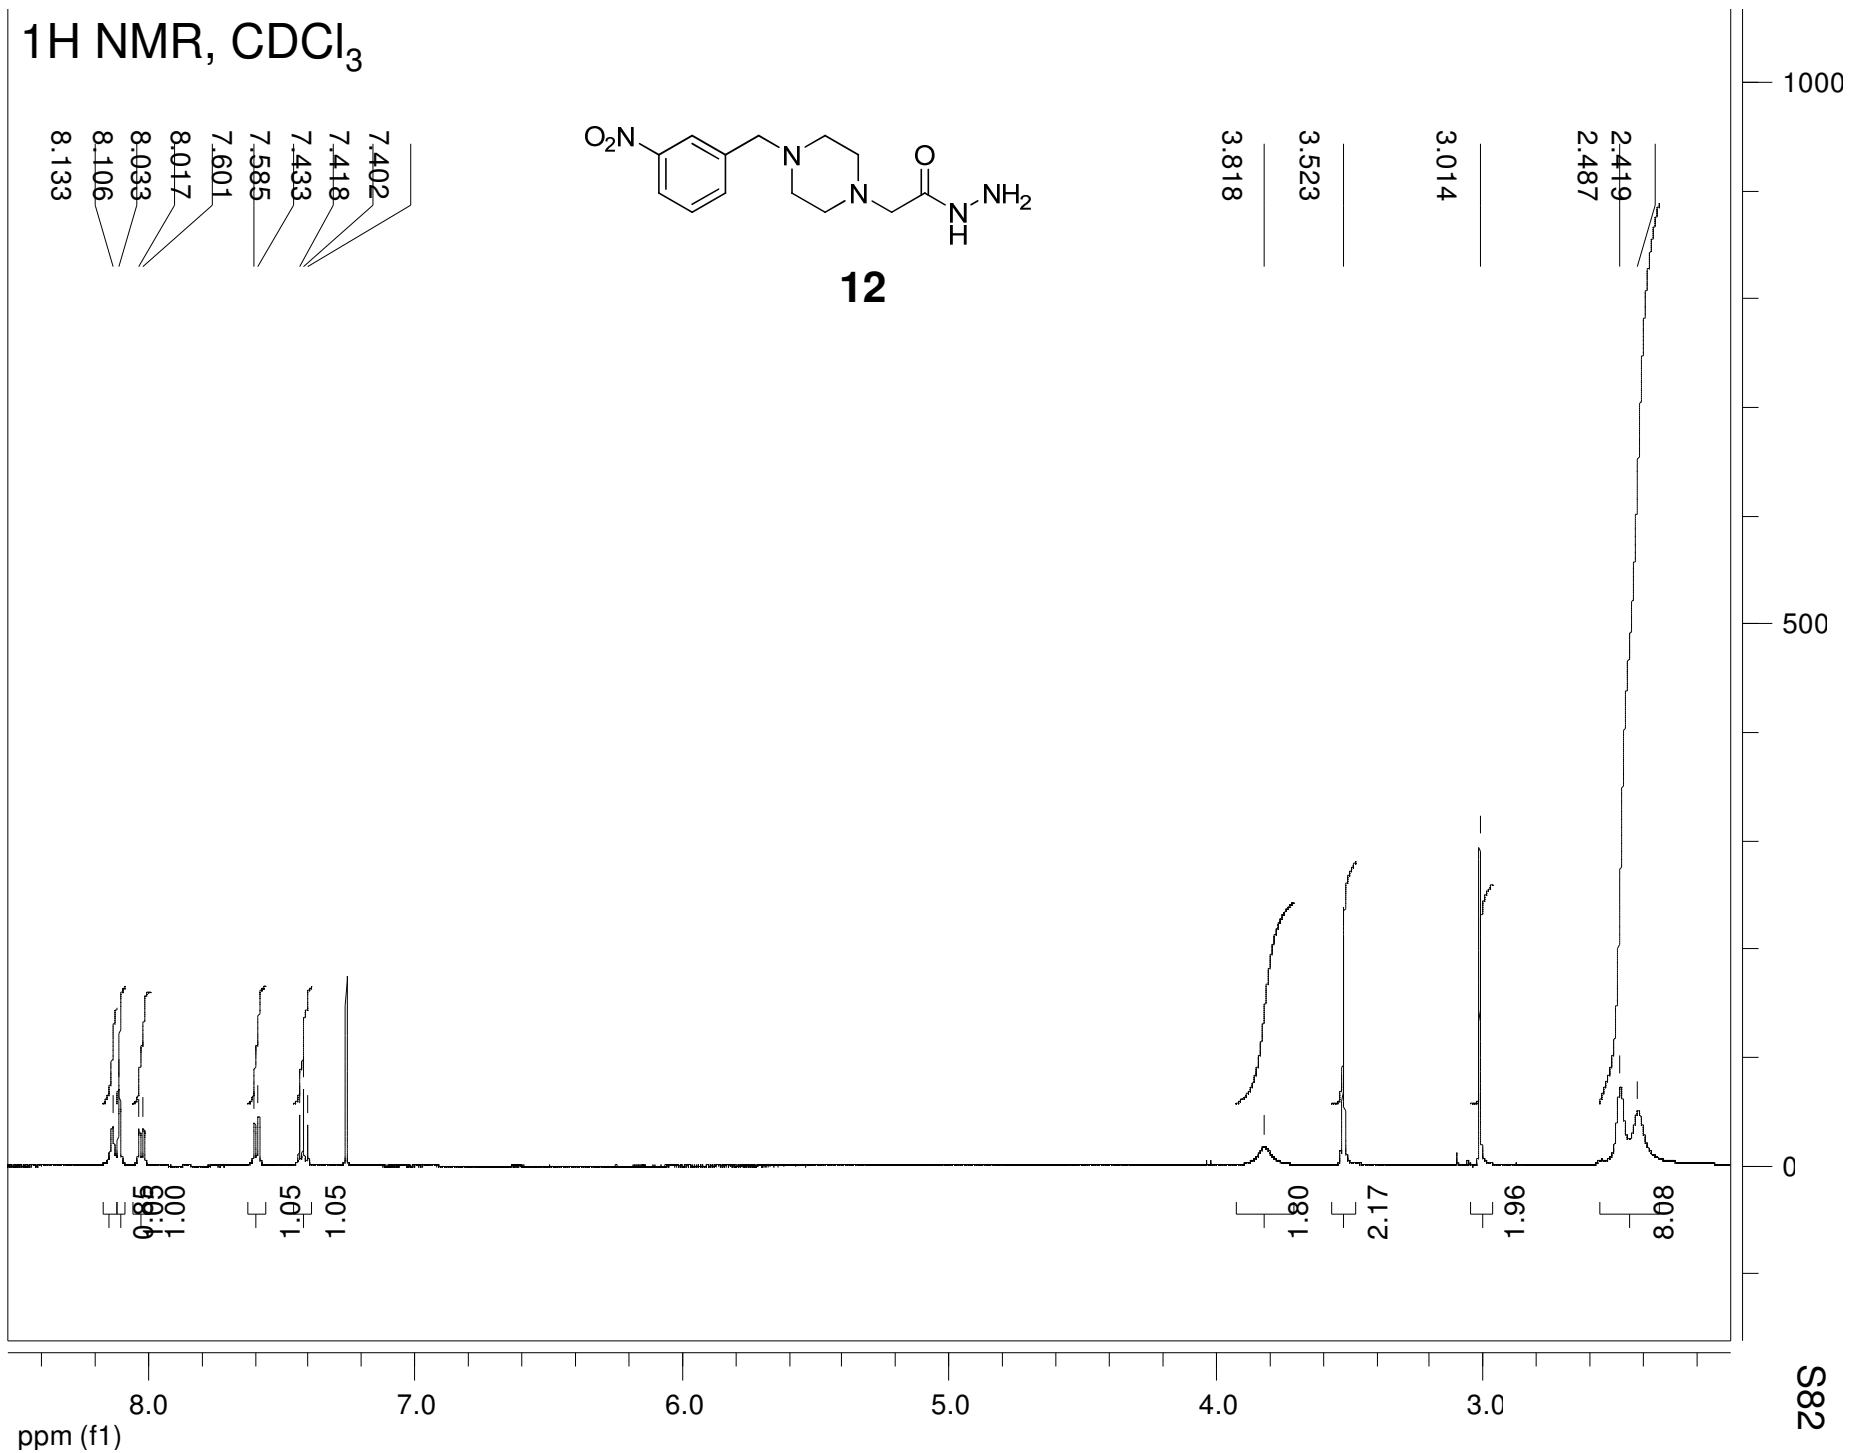

<sup>13</sup>C NMR, CDCl<sub>3</sub>

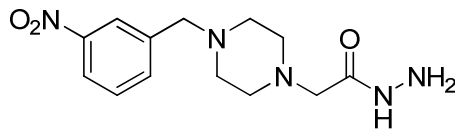

**12**

- 170.537
- 148.508
- 140.712
- 135.184
- 129.426
- 123.804
- 122.443

- 61.995
- 60.747
- 53.746
- 53.213

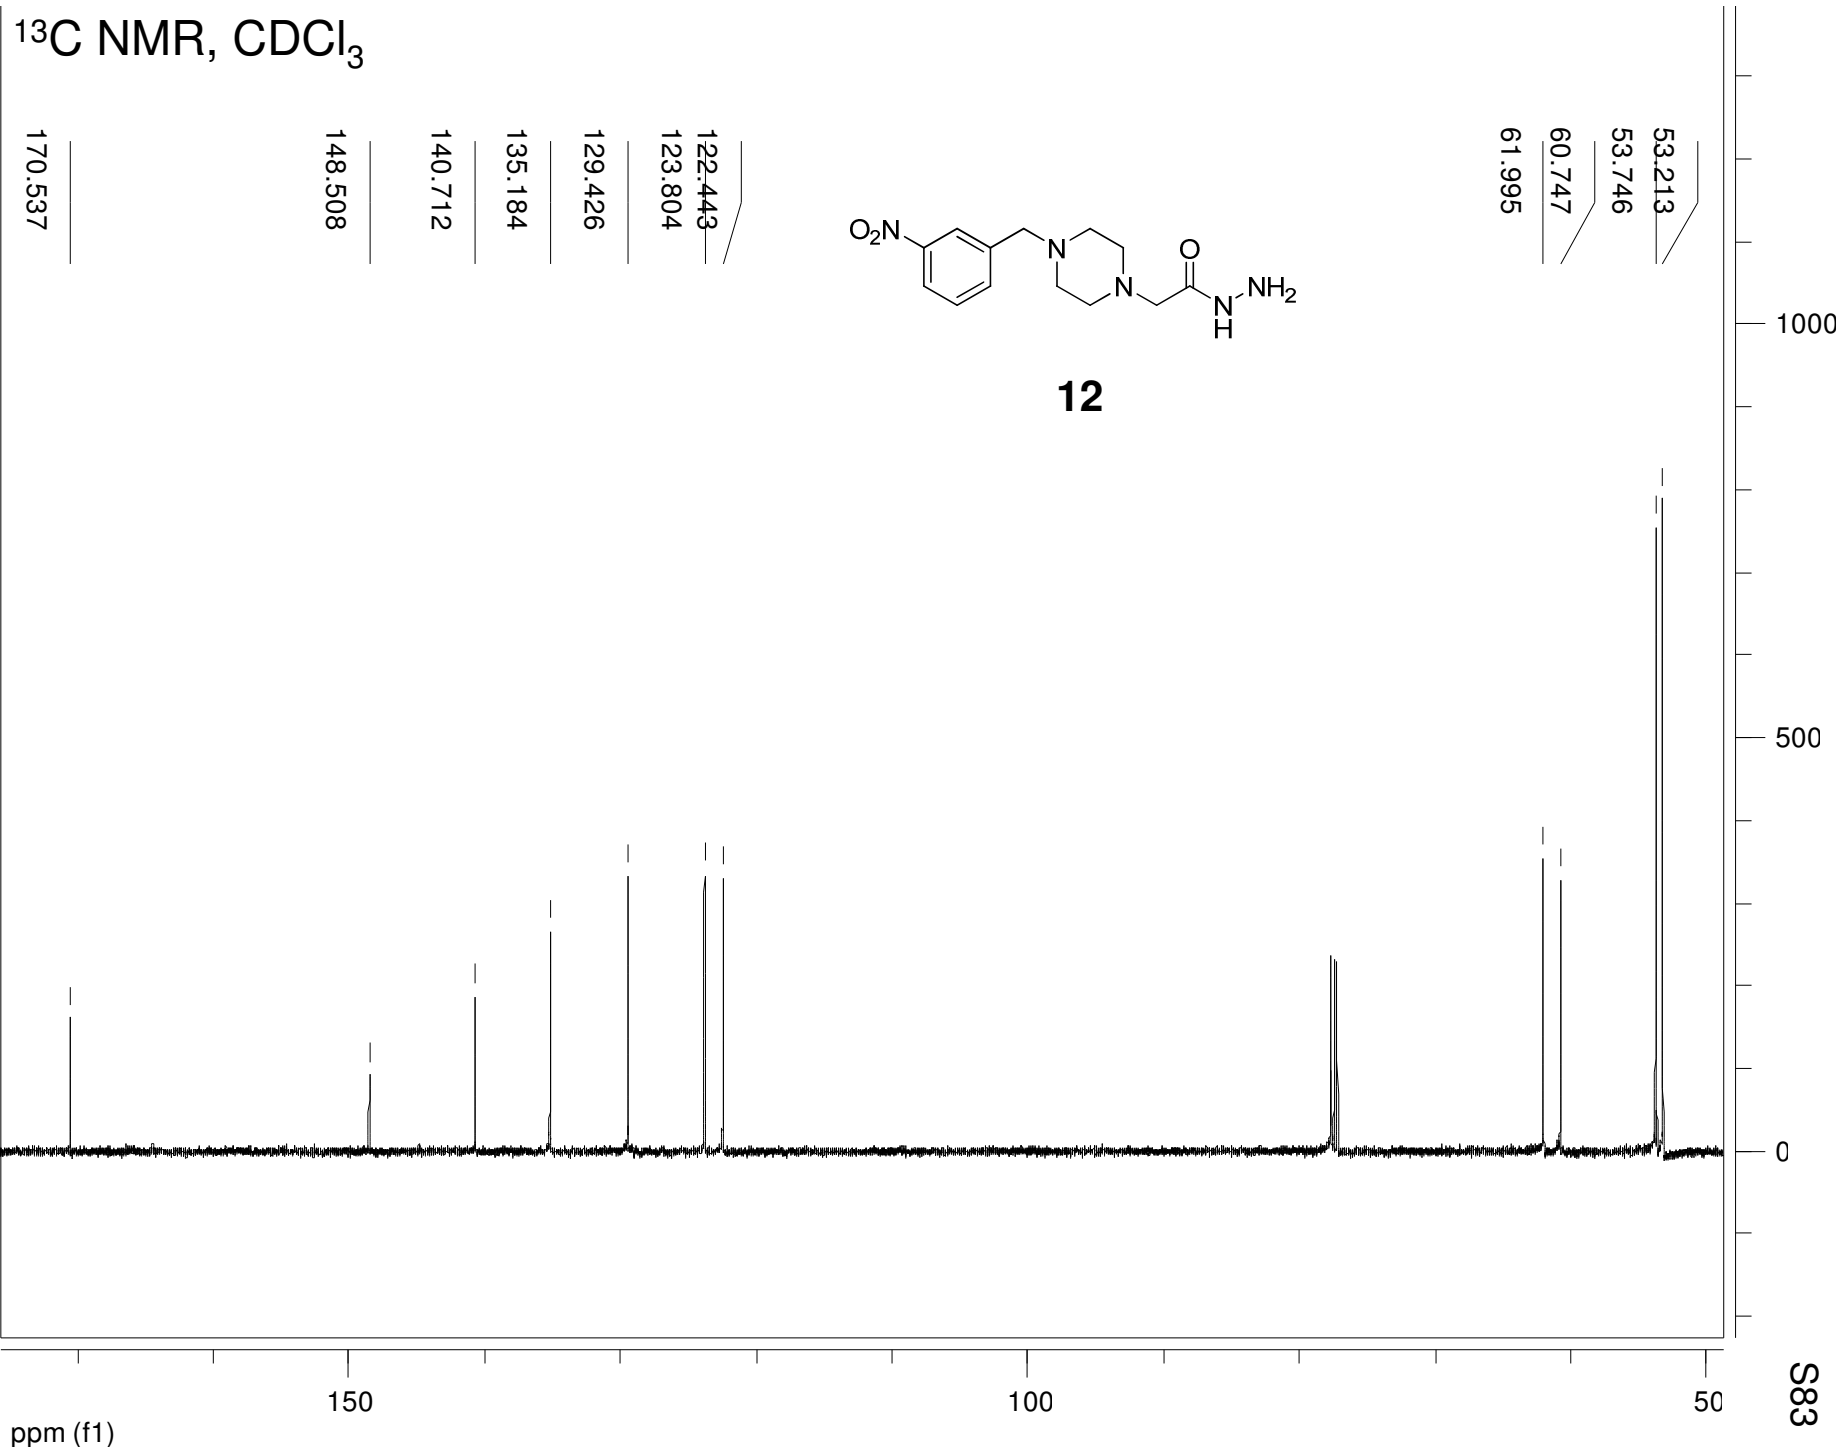

1H NMR, CDCl<sub>3</sub>

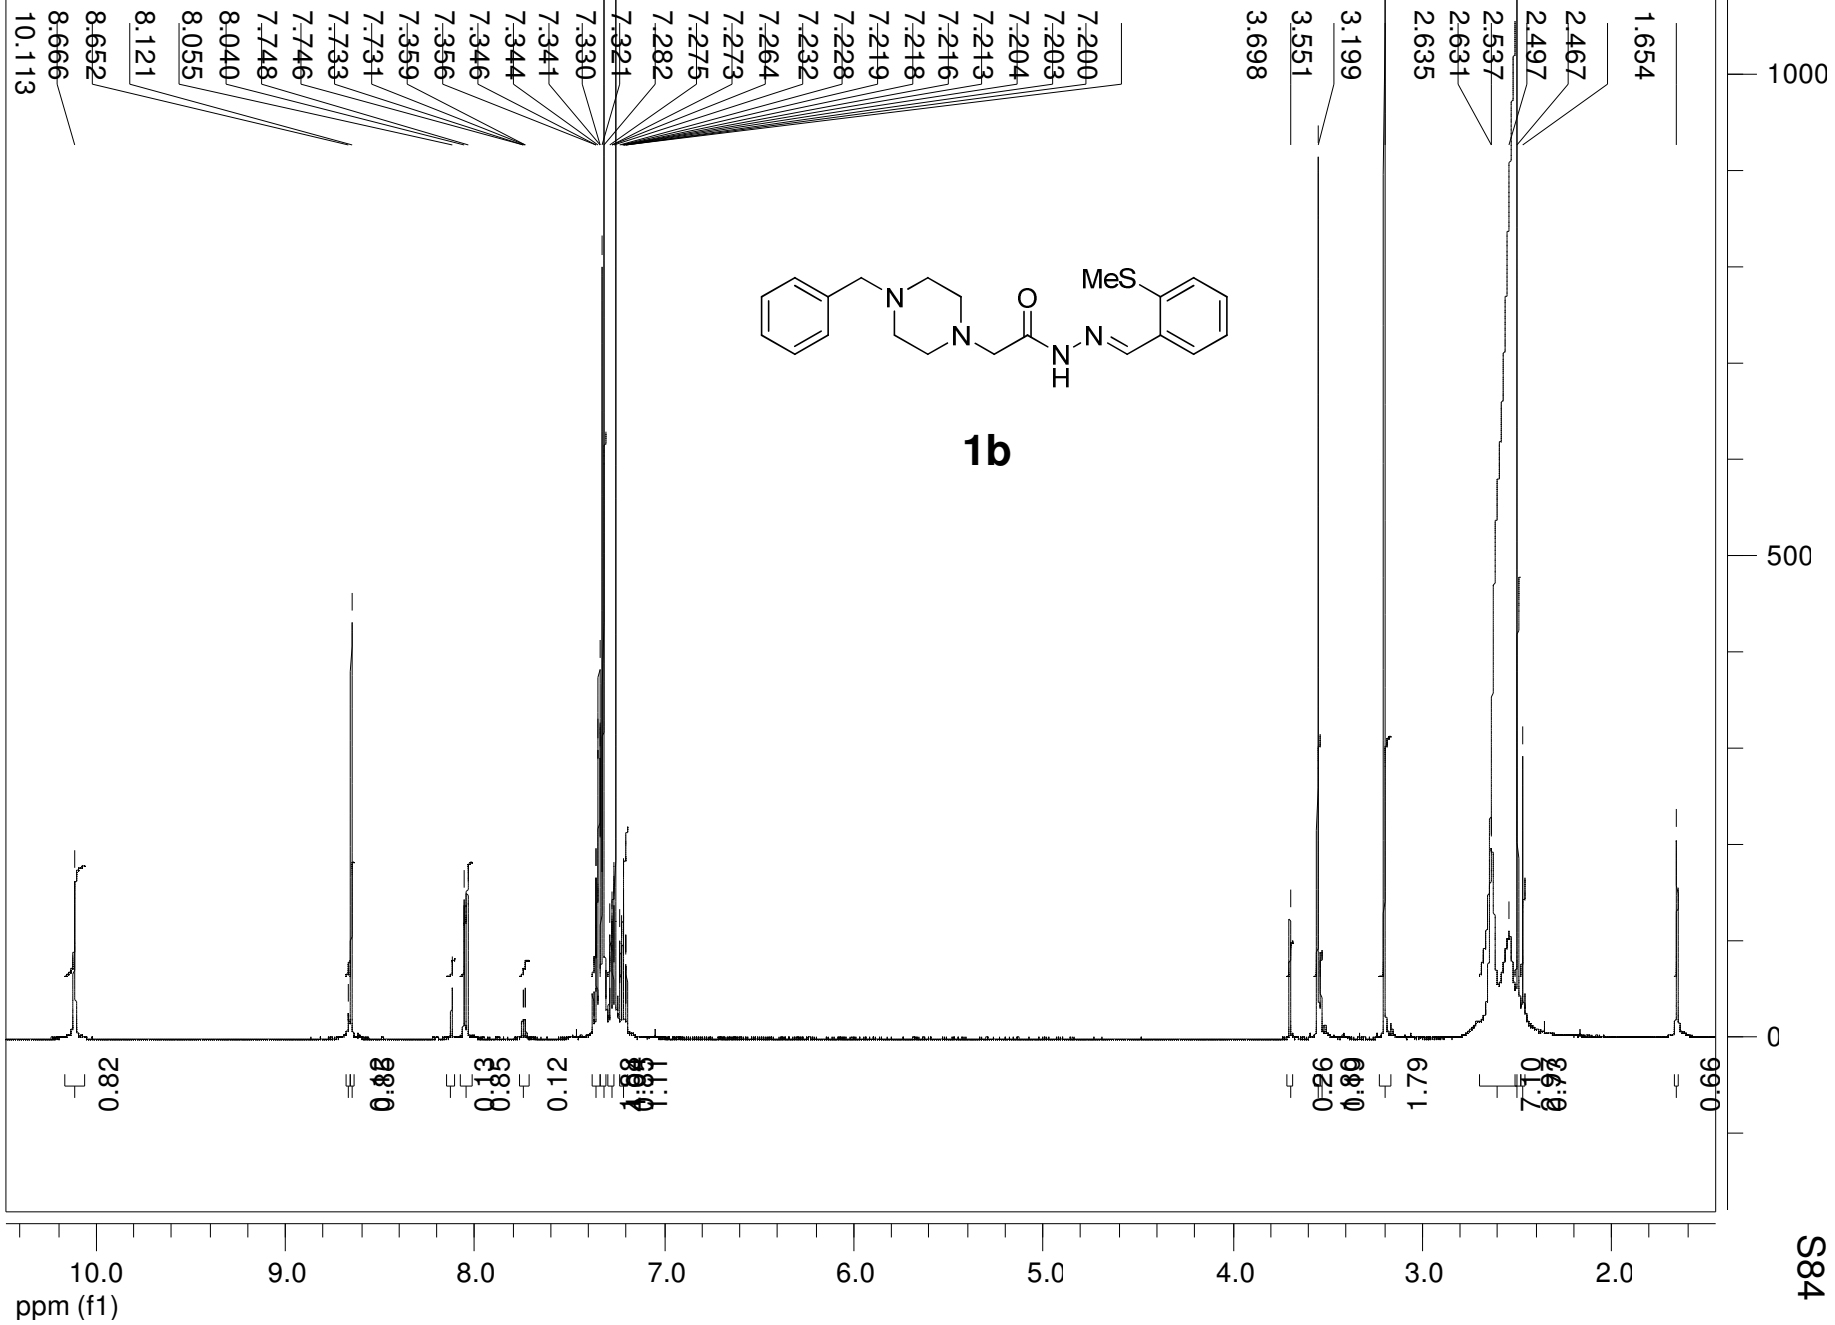



$^{13}\text{C}$  NMR,  $\text{CDCl}_3$

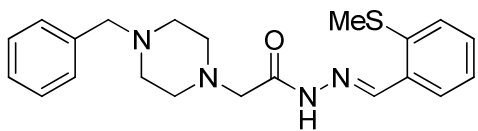

**1b**

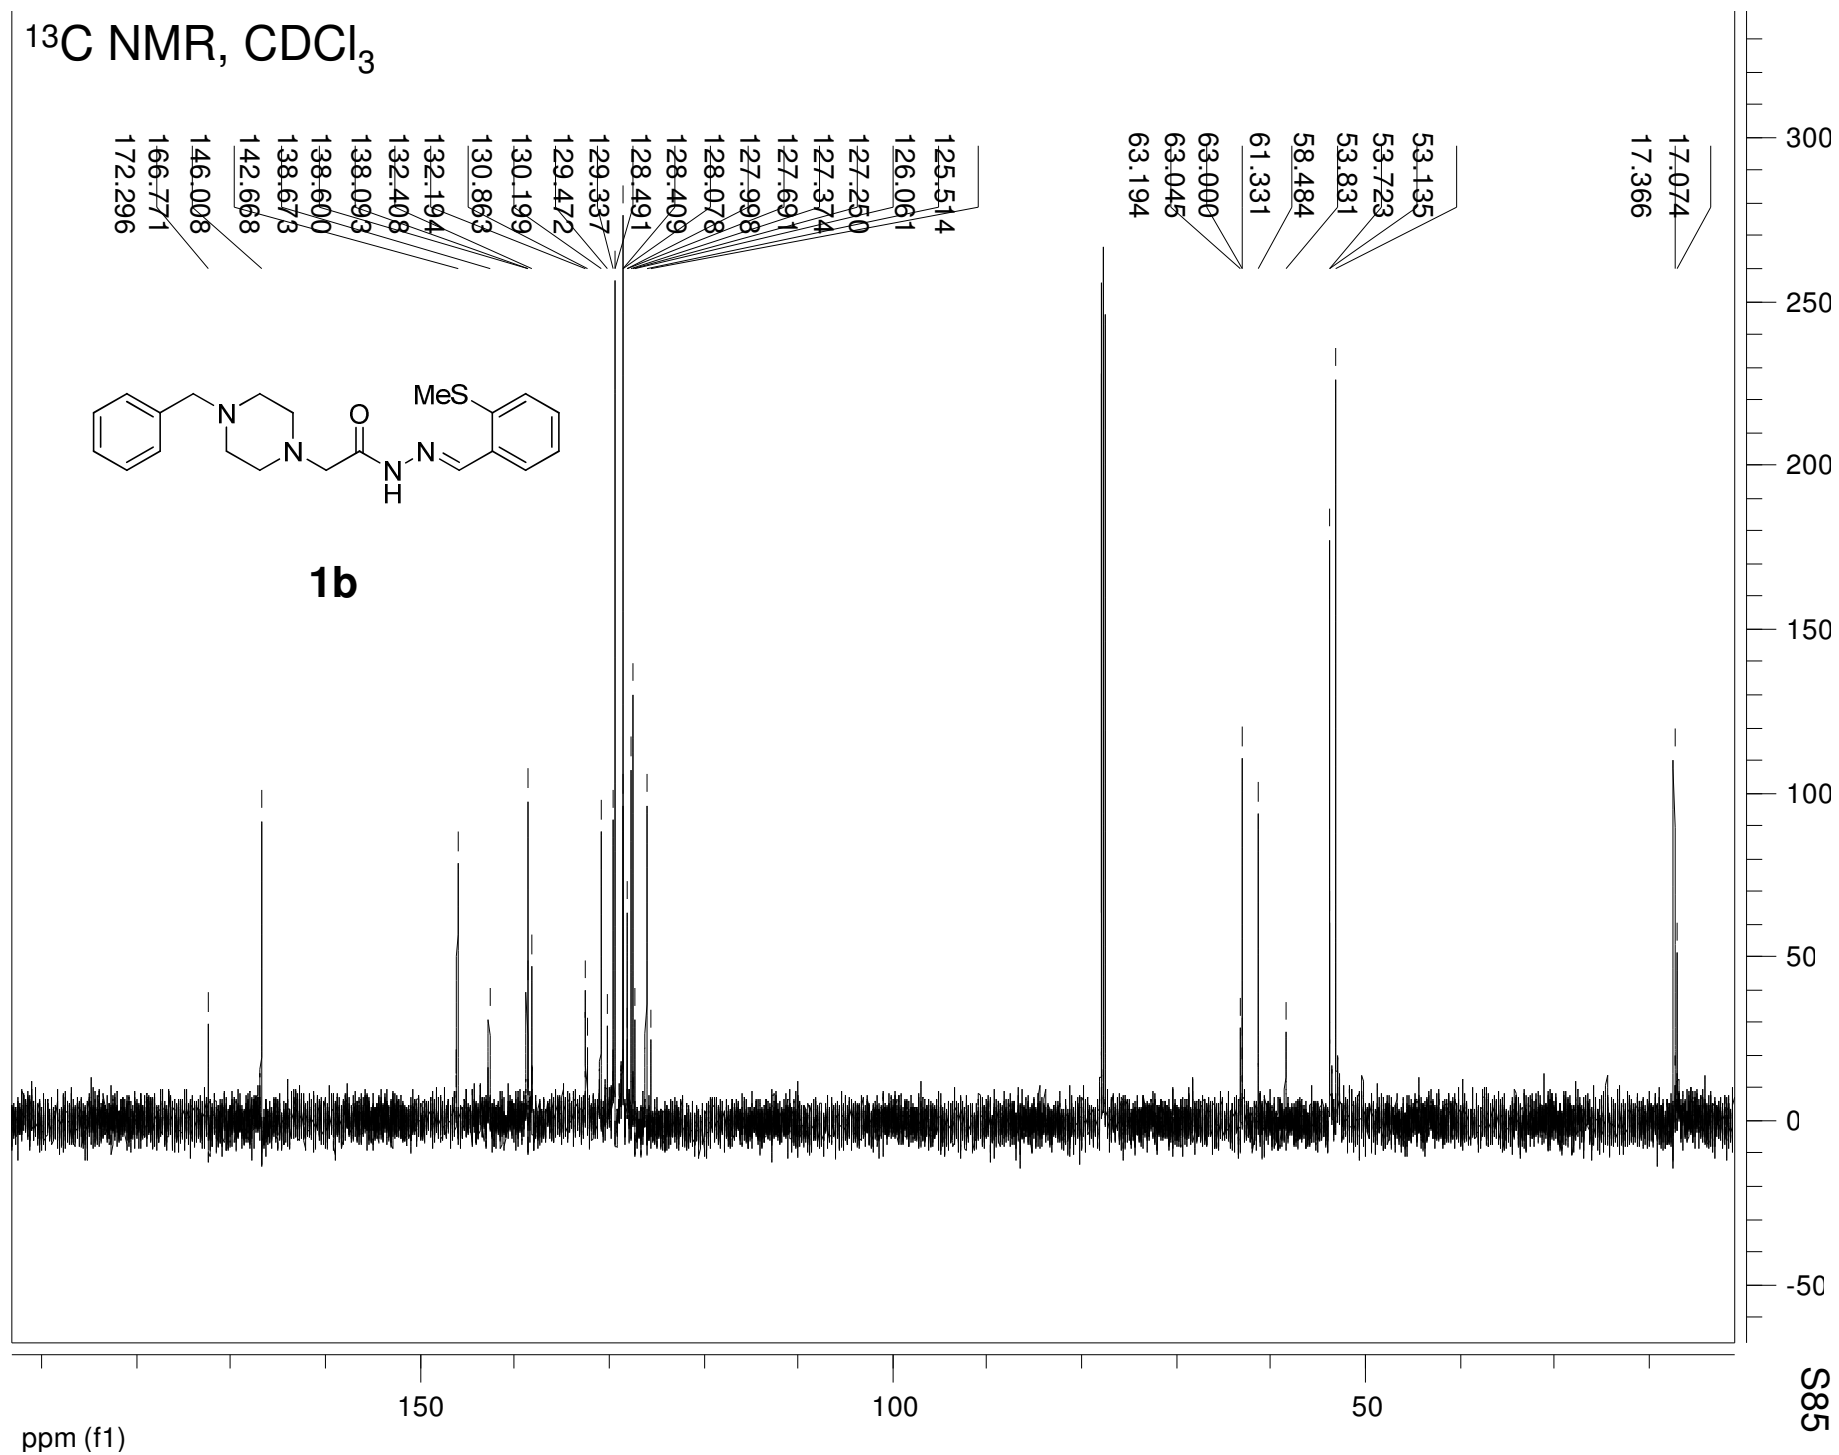



1H NMR, CDCl<sub>3</sub>

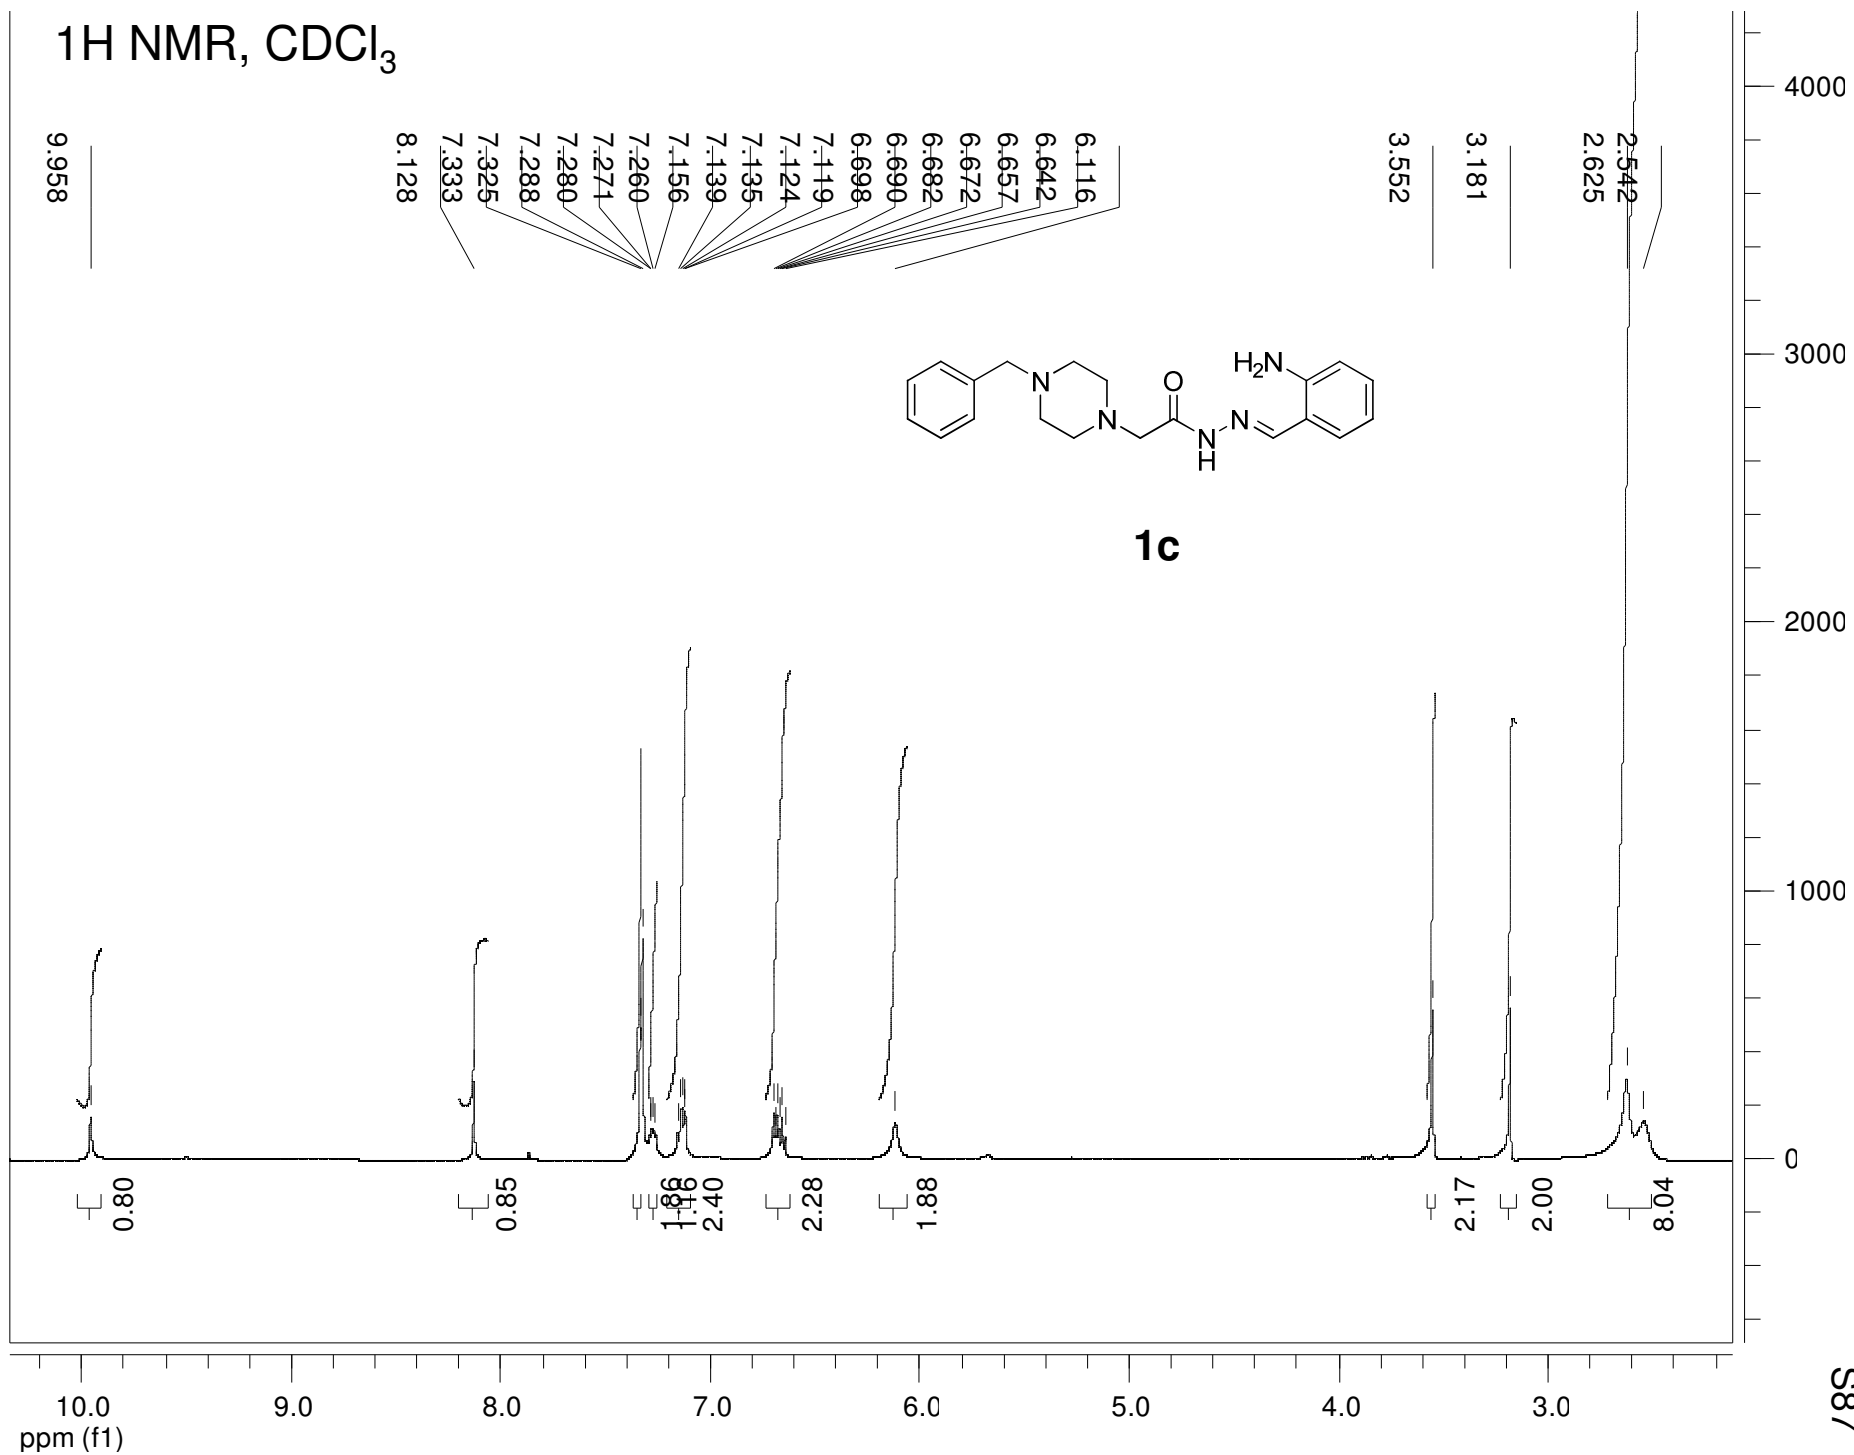

<sup>13</sup>C NMR, CDCl<sub>3</sub>

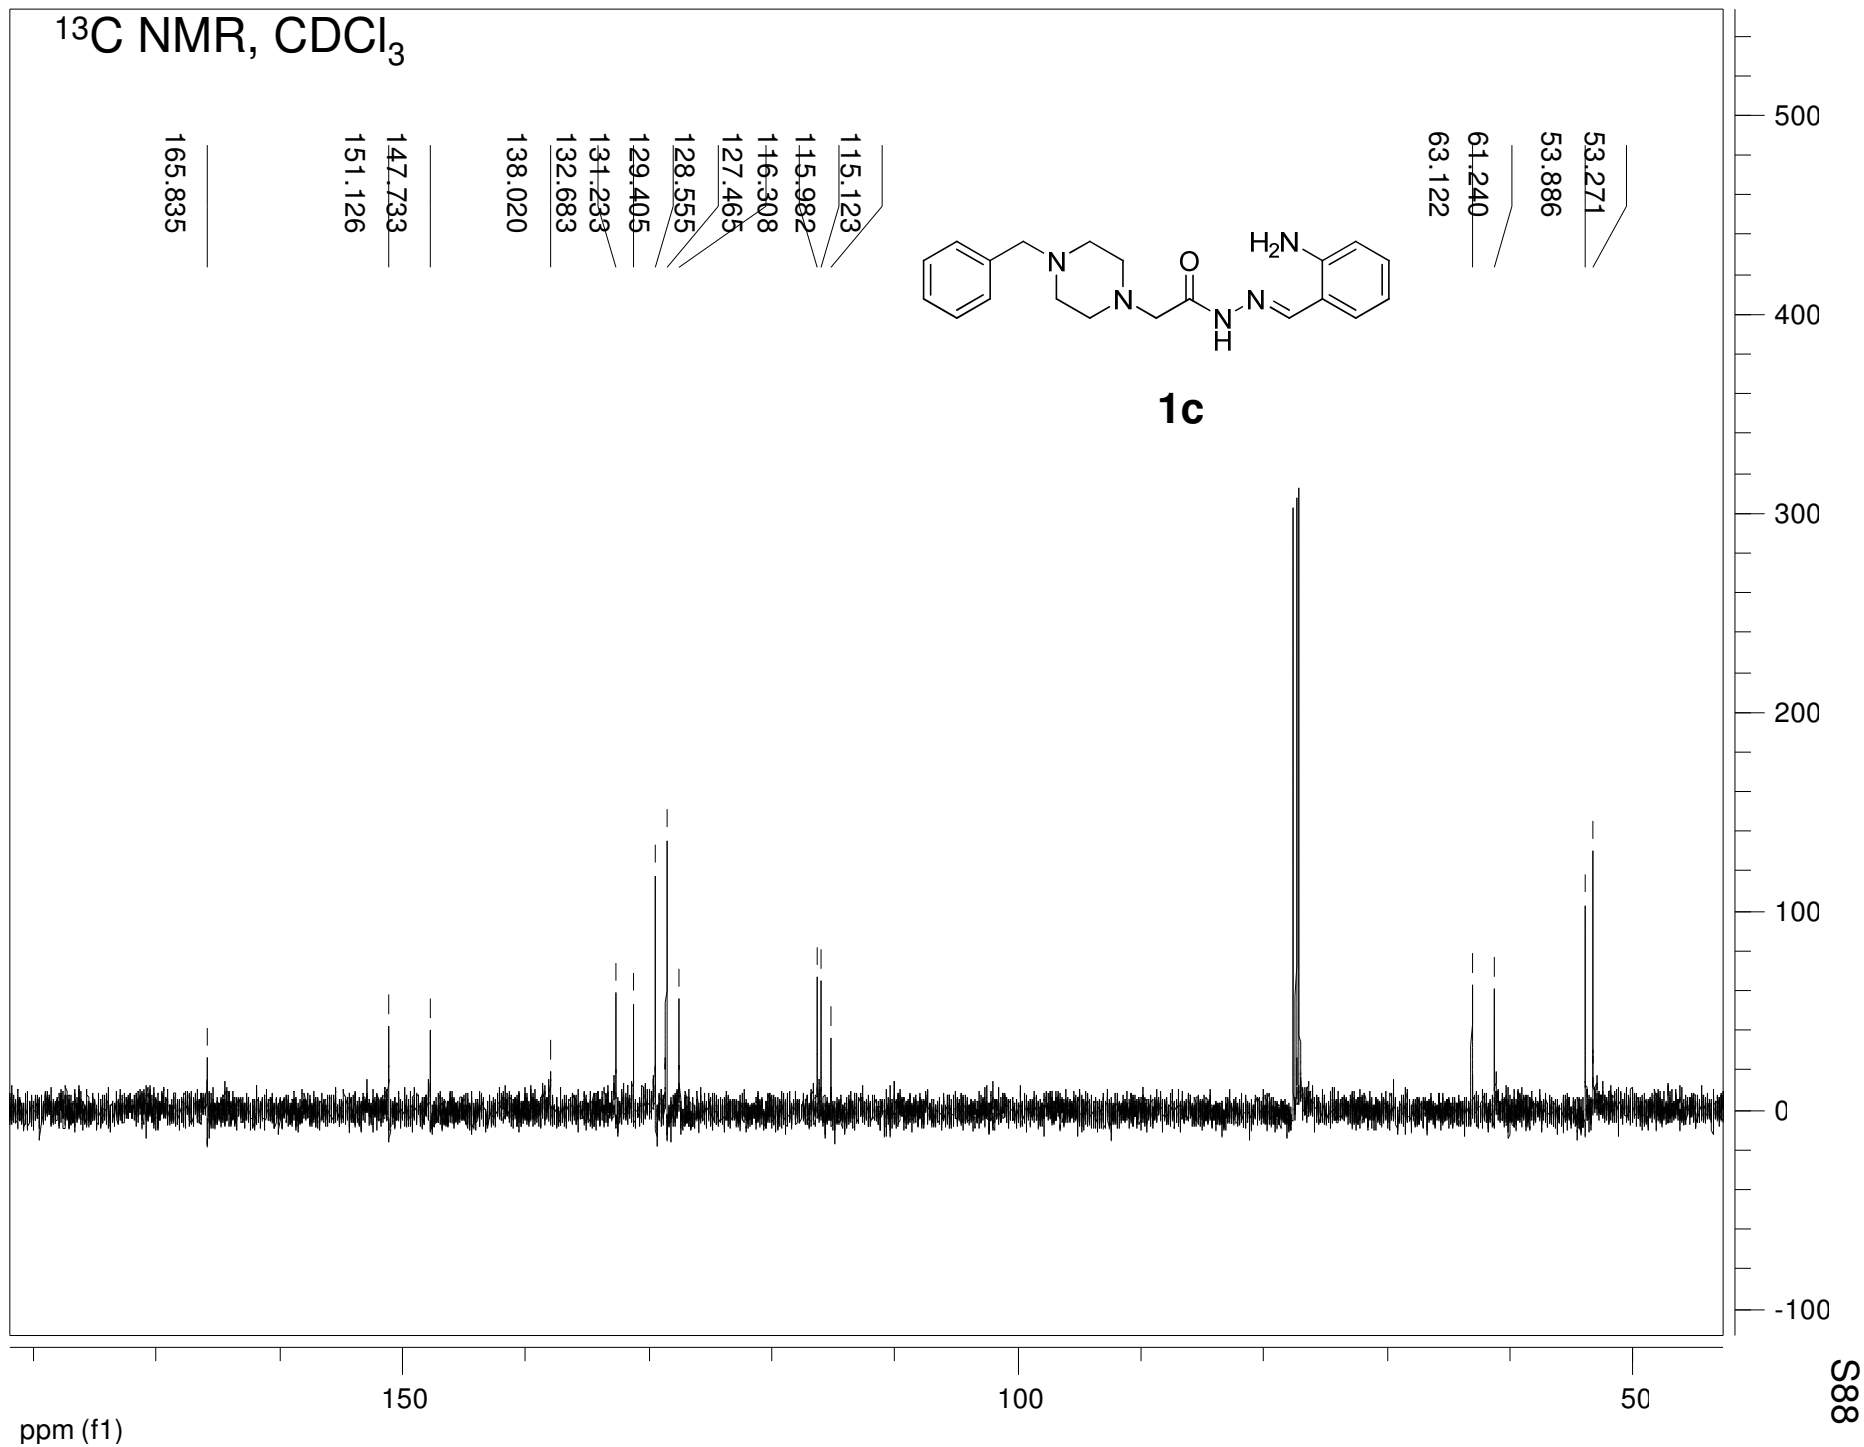

LC-MS

Purity: 99%

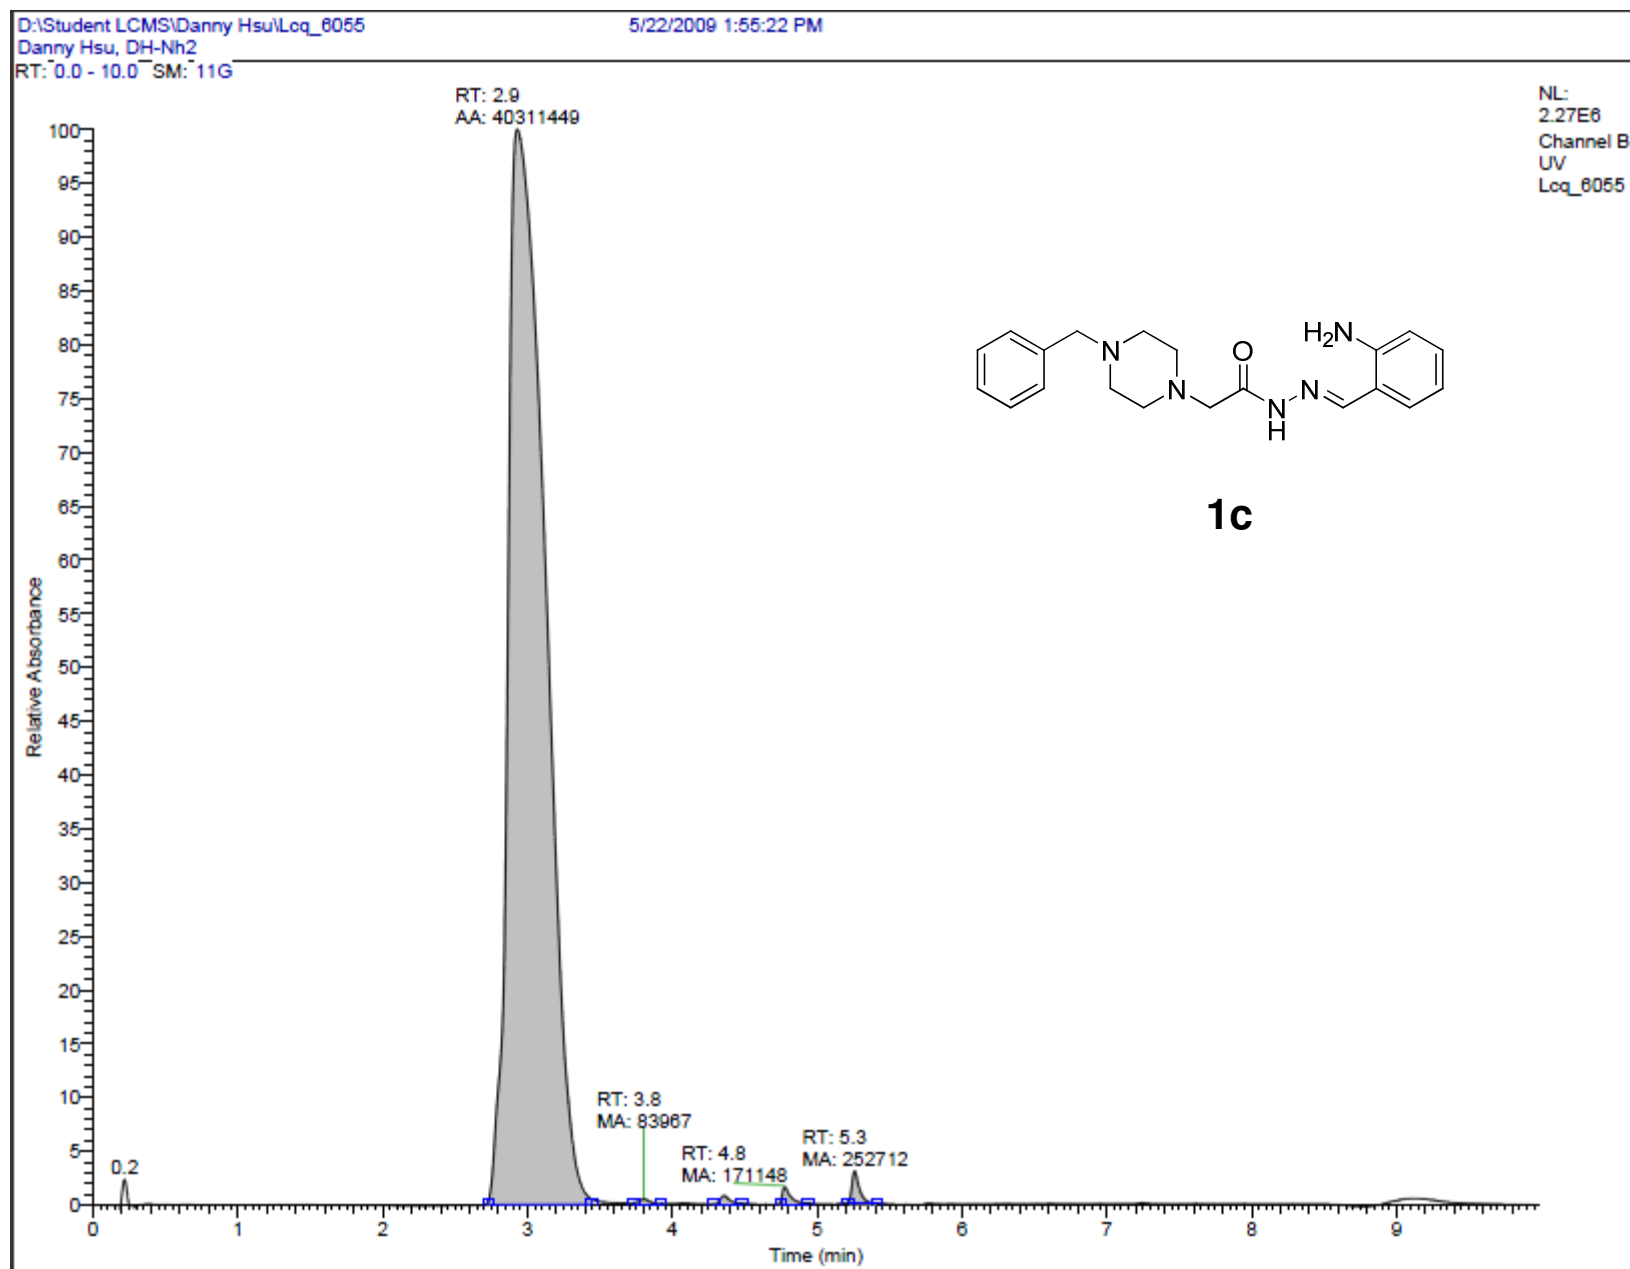

1H NMR, CD<sub>3</sub>OD

8.071  
7.925  
7.915  
7.696  
7.692  
7.679  
7.666  
7.655  
7.411  
7.400  
7.396  
7.392  
7.397  
7.382  
7.377  
7.374  
7.353  
7.340  
7.334  
7.330  
7.318  
7.314  
7.300  
7.293  
7.288  
7.281  
7.276  
7.266

3.750  
3.629  
3.589  
3.144  
2.785  
2.783  
2.782  
2.597

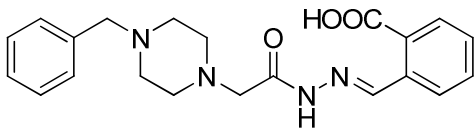

1d

00.7  
90.1  
22.0  
22.0  
22.0  
92.0  
77.0  
58.7  
34.1  
14.4  
14.4  
14.4

9.0 ppm (f1)  
8.0  
7.0  
6.0  
5.0  
4.0  
3.0  
S90

<sup>13</sup>C NMR, CD<sub>3</sub>OD

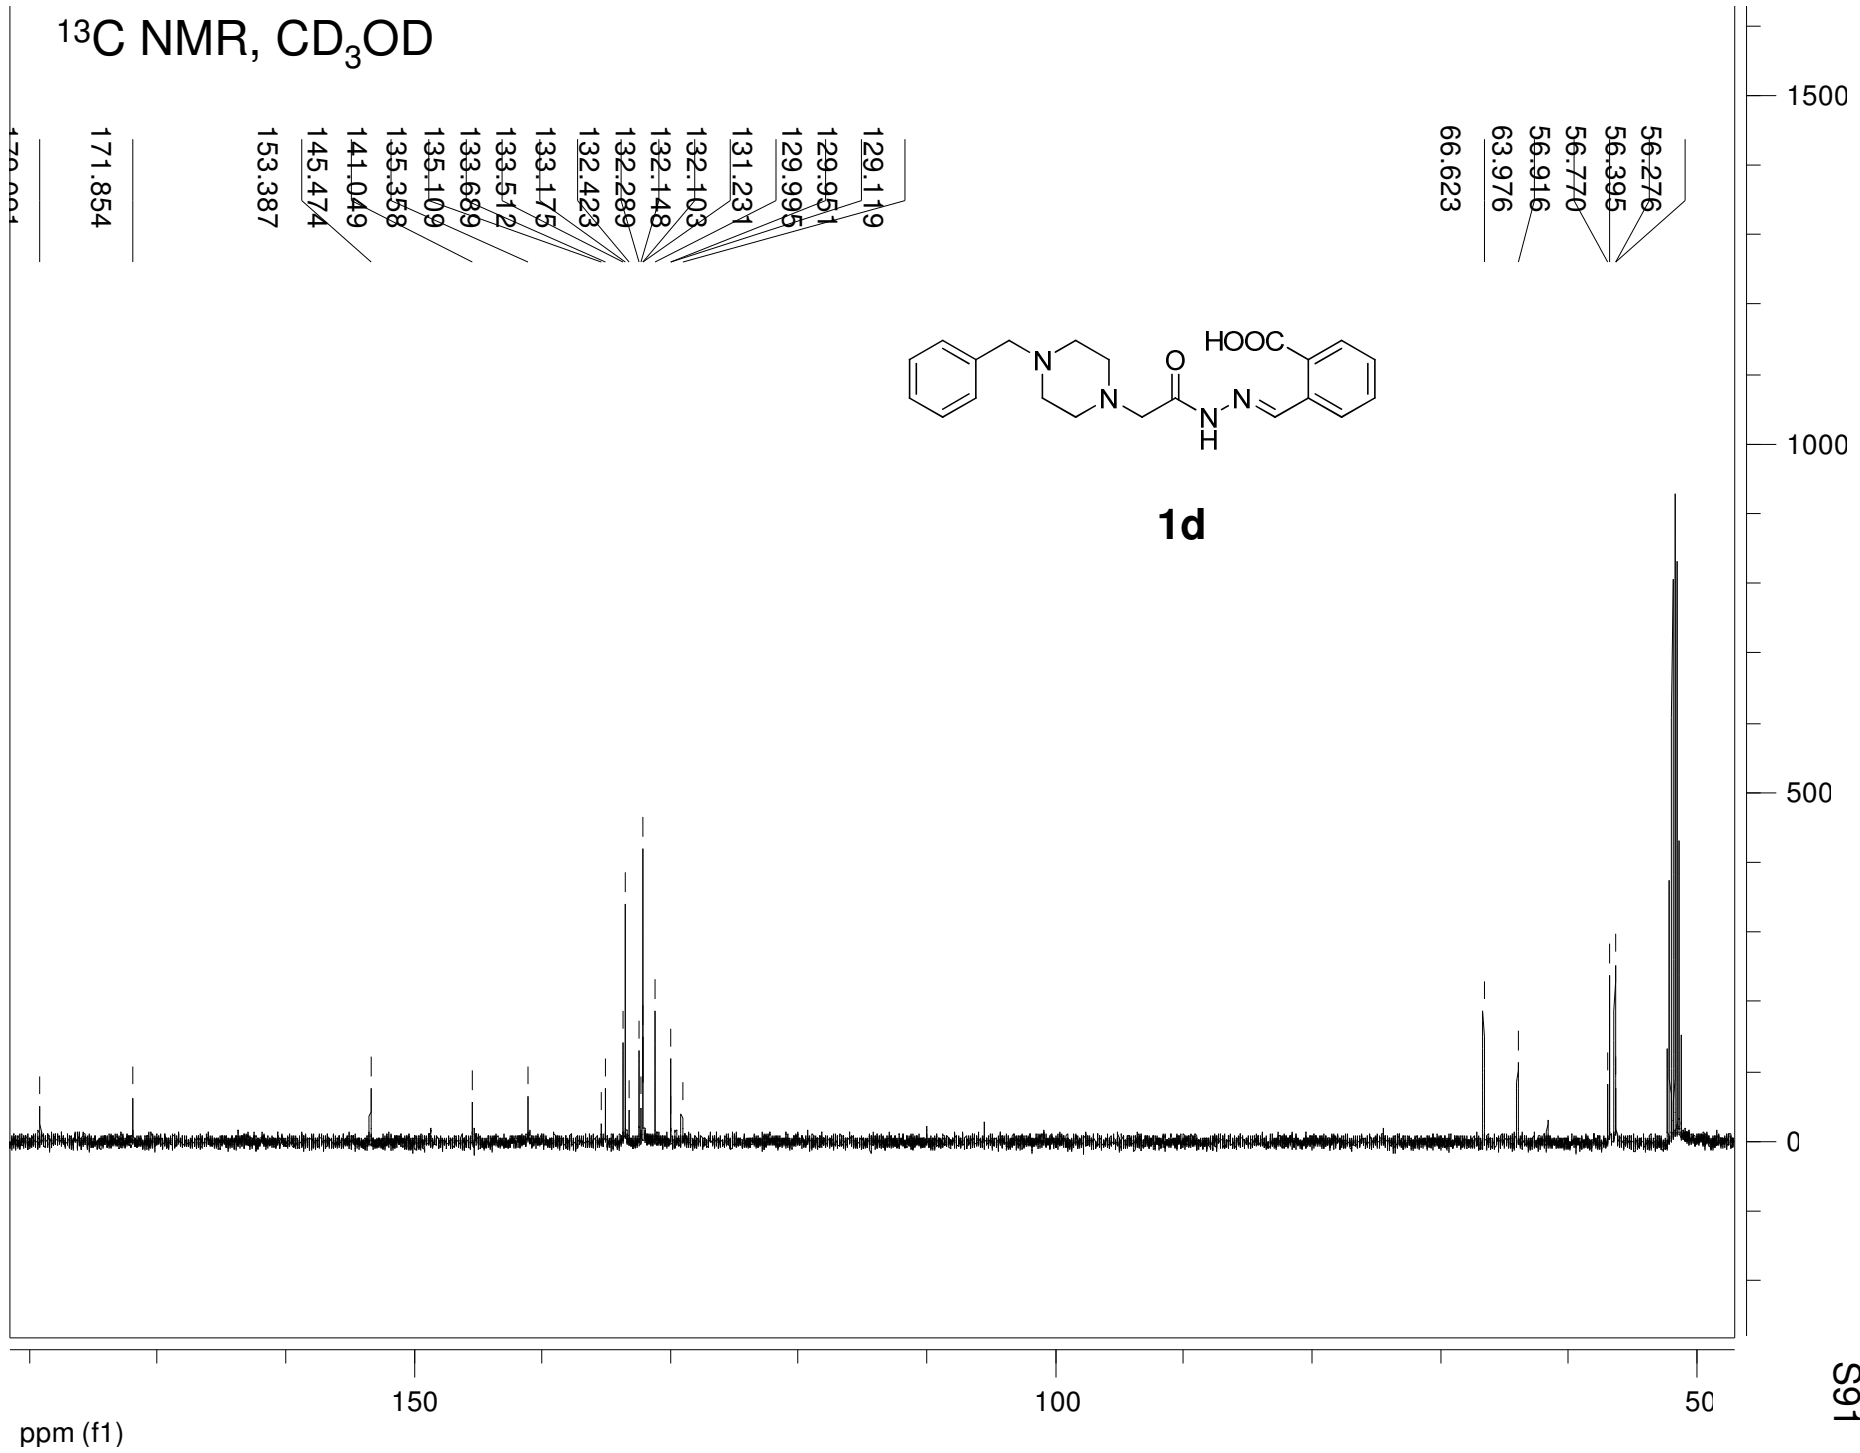

# HPLC

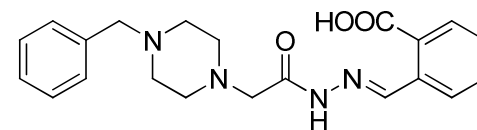

**1d**

\* RUN # 485      JAN 15, 2008 14:44:03  
START

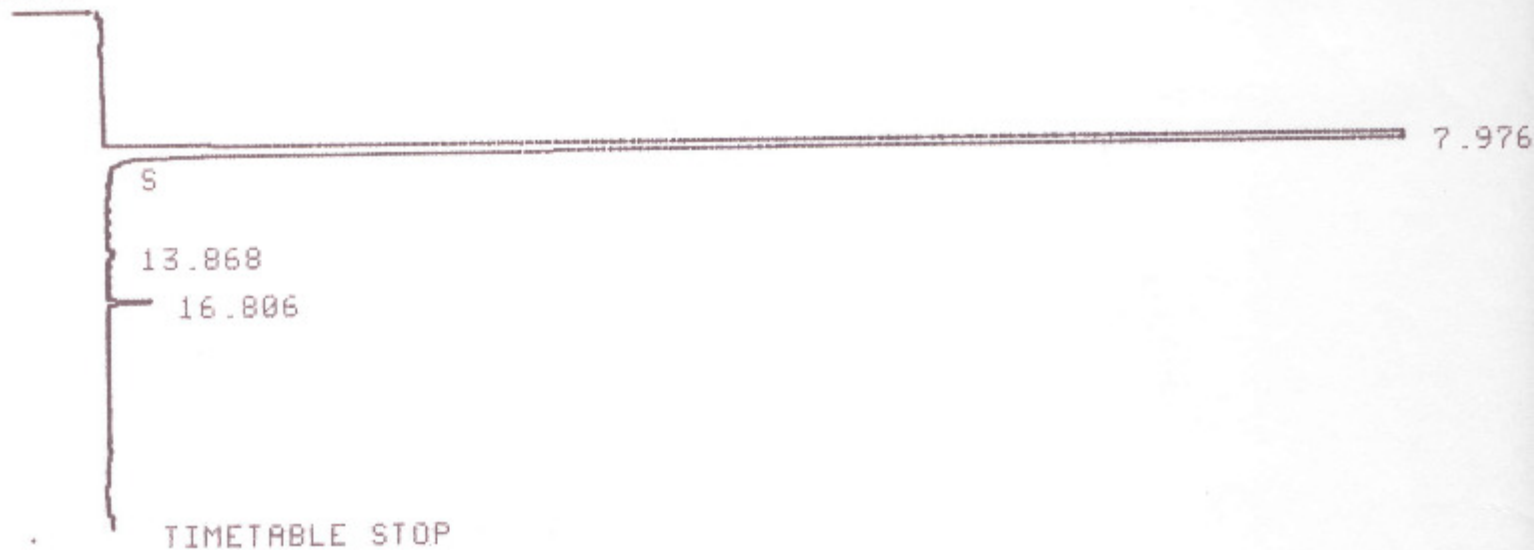

RUN# 485      JAN 15, 2008 14:44:03

AREA%

| RT     | AREA     | TYPE | WIDTH | AREA%    |
|--------|----------|------|-------|----------|
| 7.976  | 95377600 | SBB  | .343  | 99.04042 |
| 13.868 | 102115   | BU   | .259  | .18911   |
| 16.806 | 741989   | BU   | .172  | .77048   |

TOTAL AREA=9.6302E+07  
MUL FACTOR=1.0000E+00



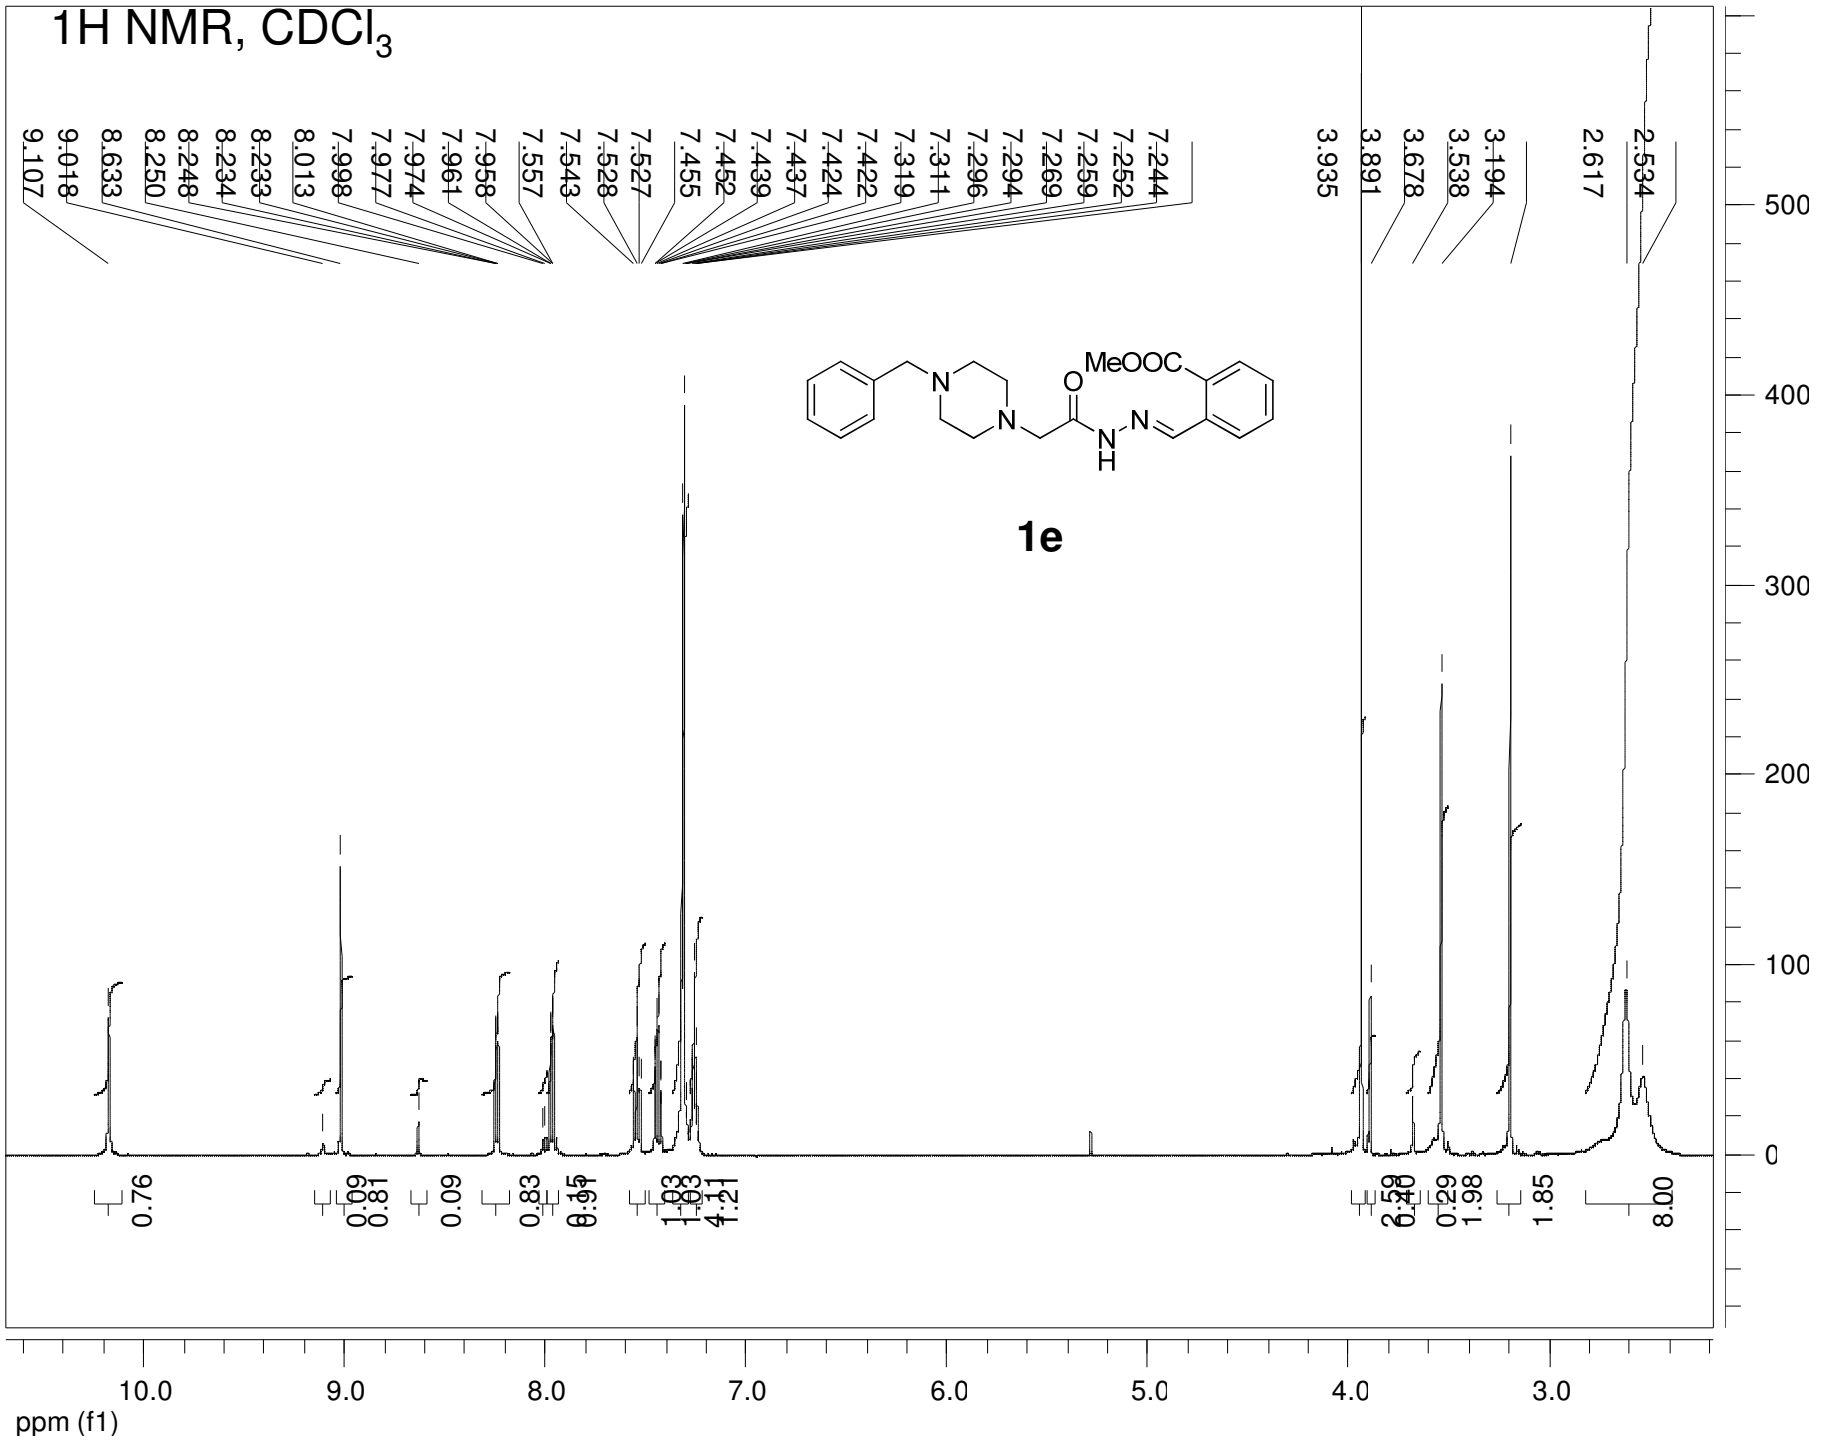

<sup>13</sup>C NMR, CDCl<sub>3</sub>

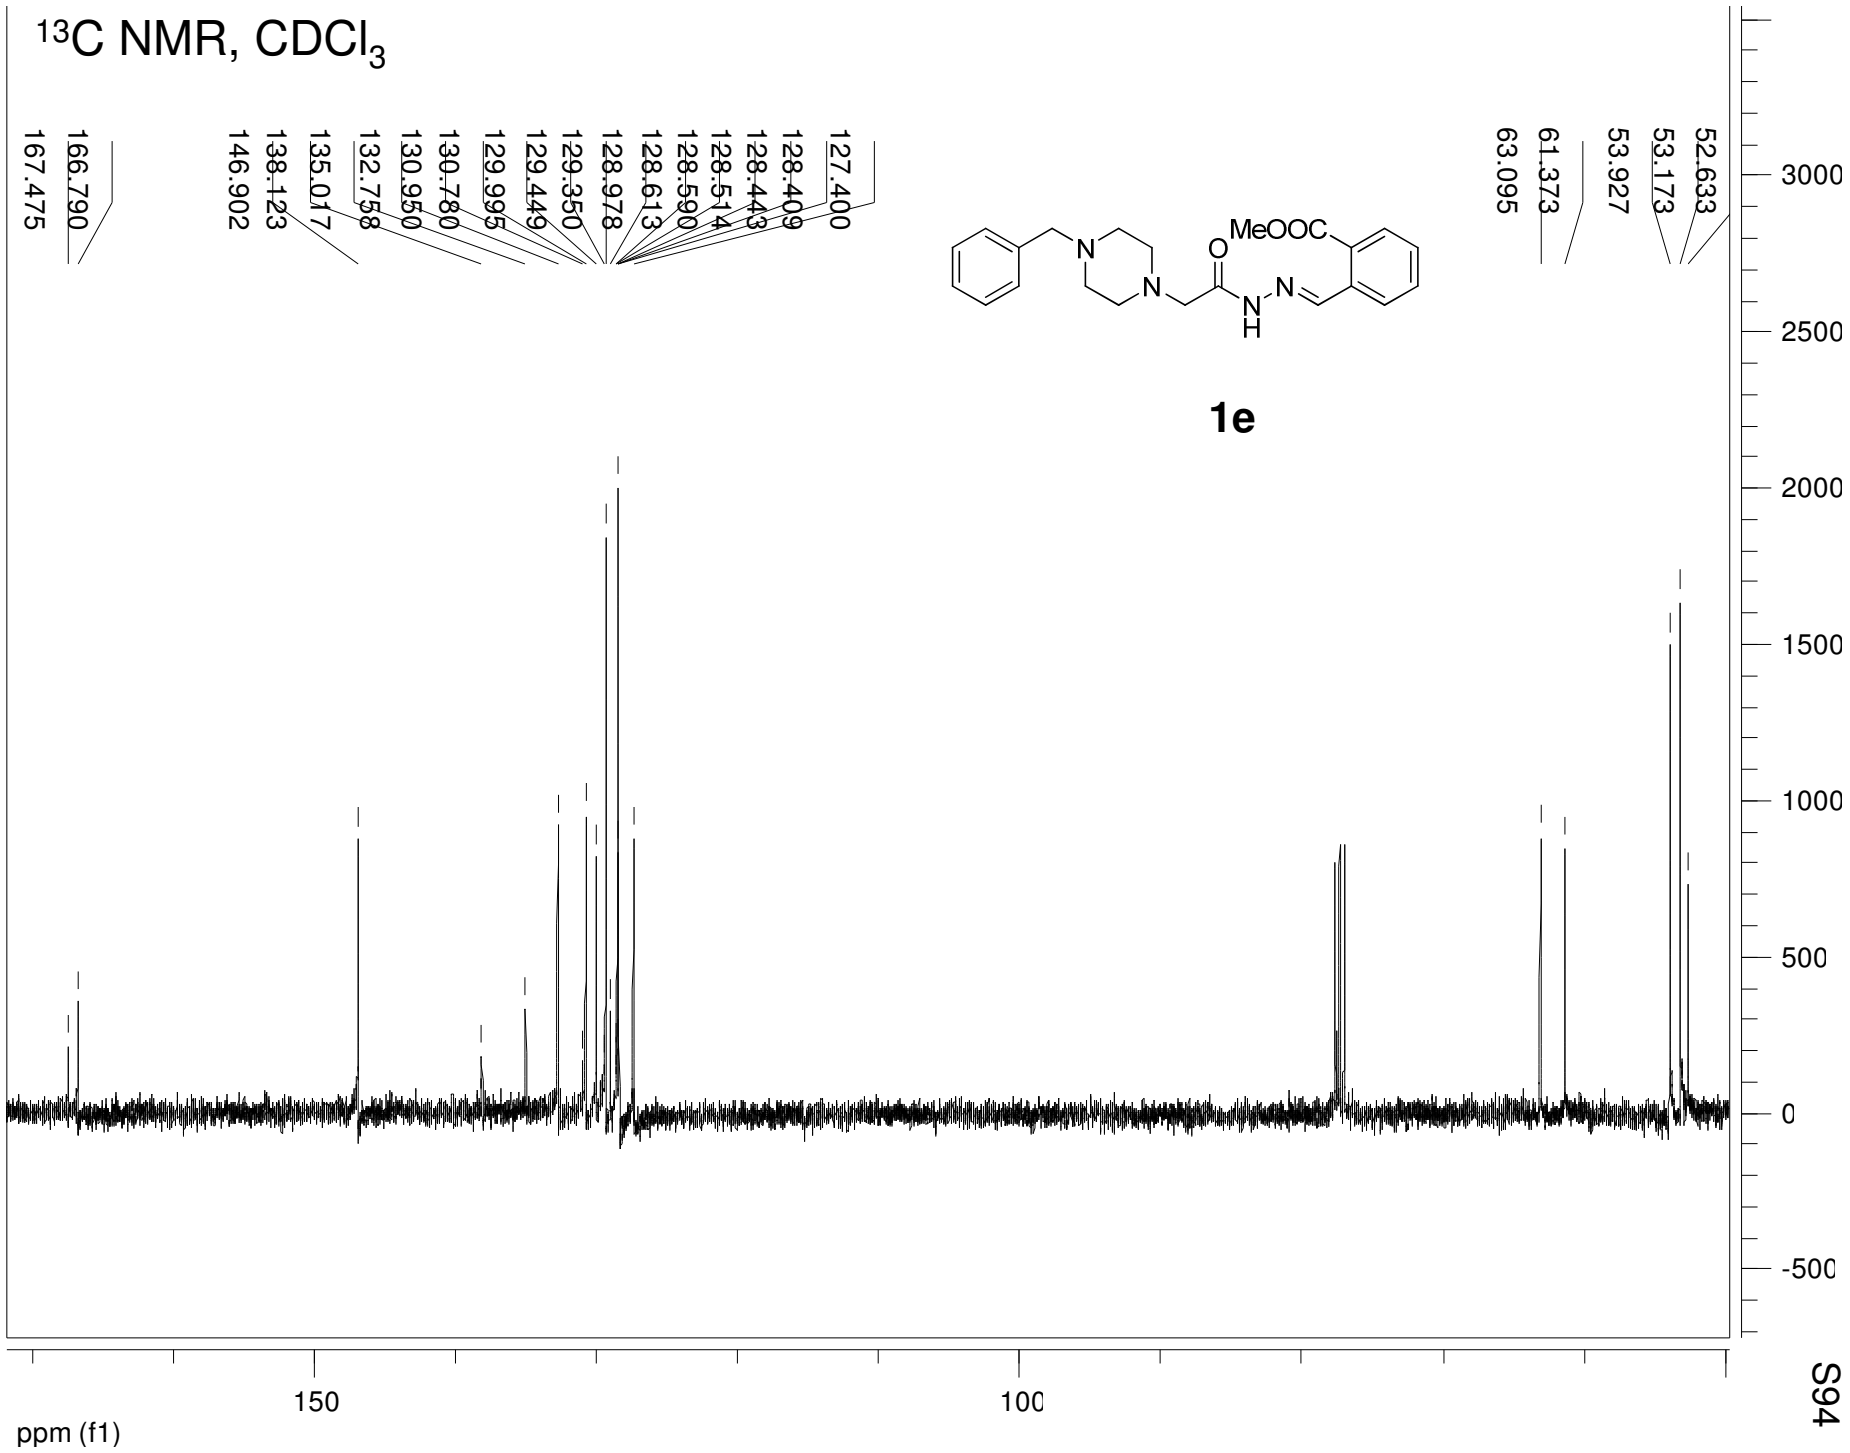

LC-MS

Purity: 98%

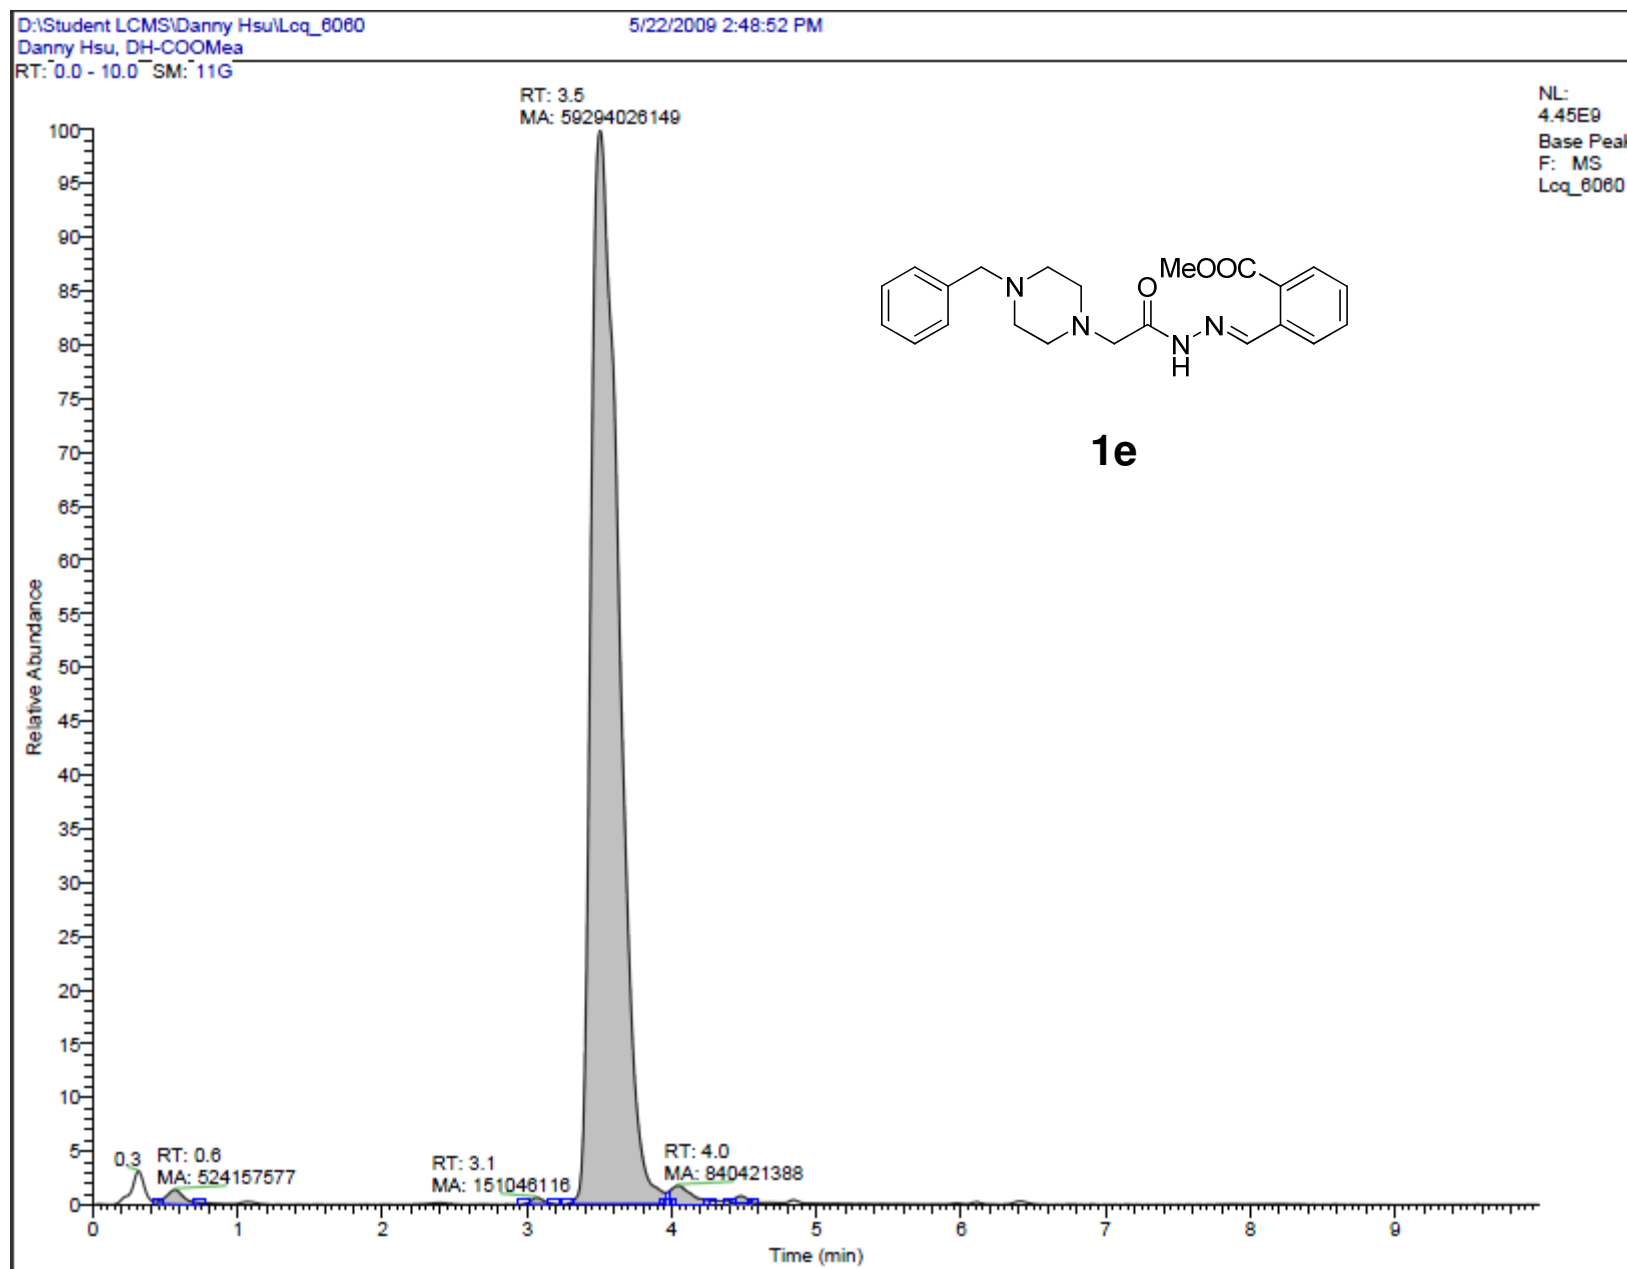

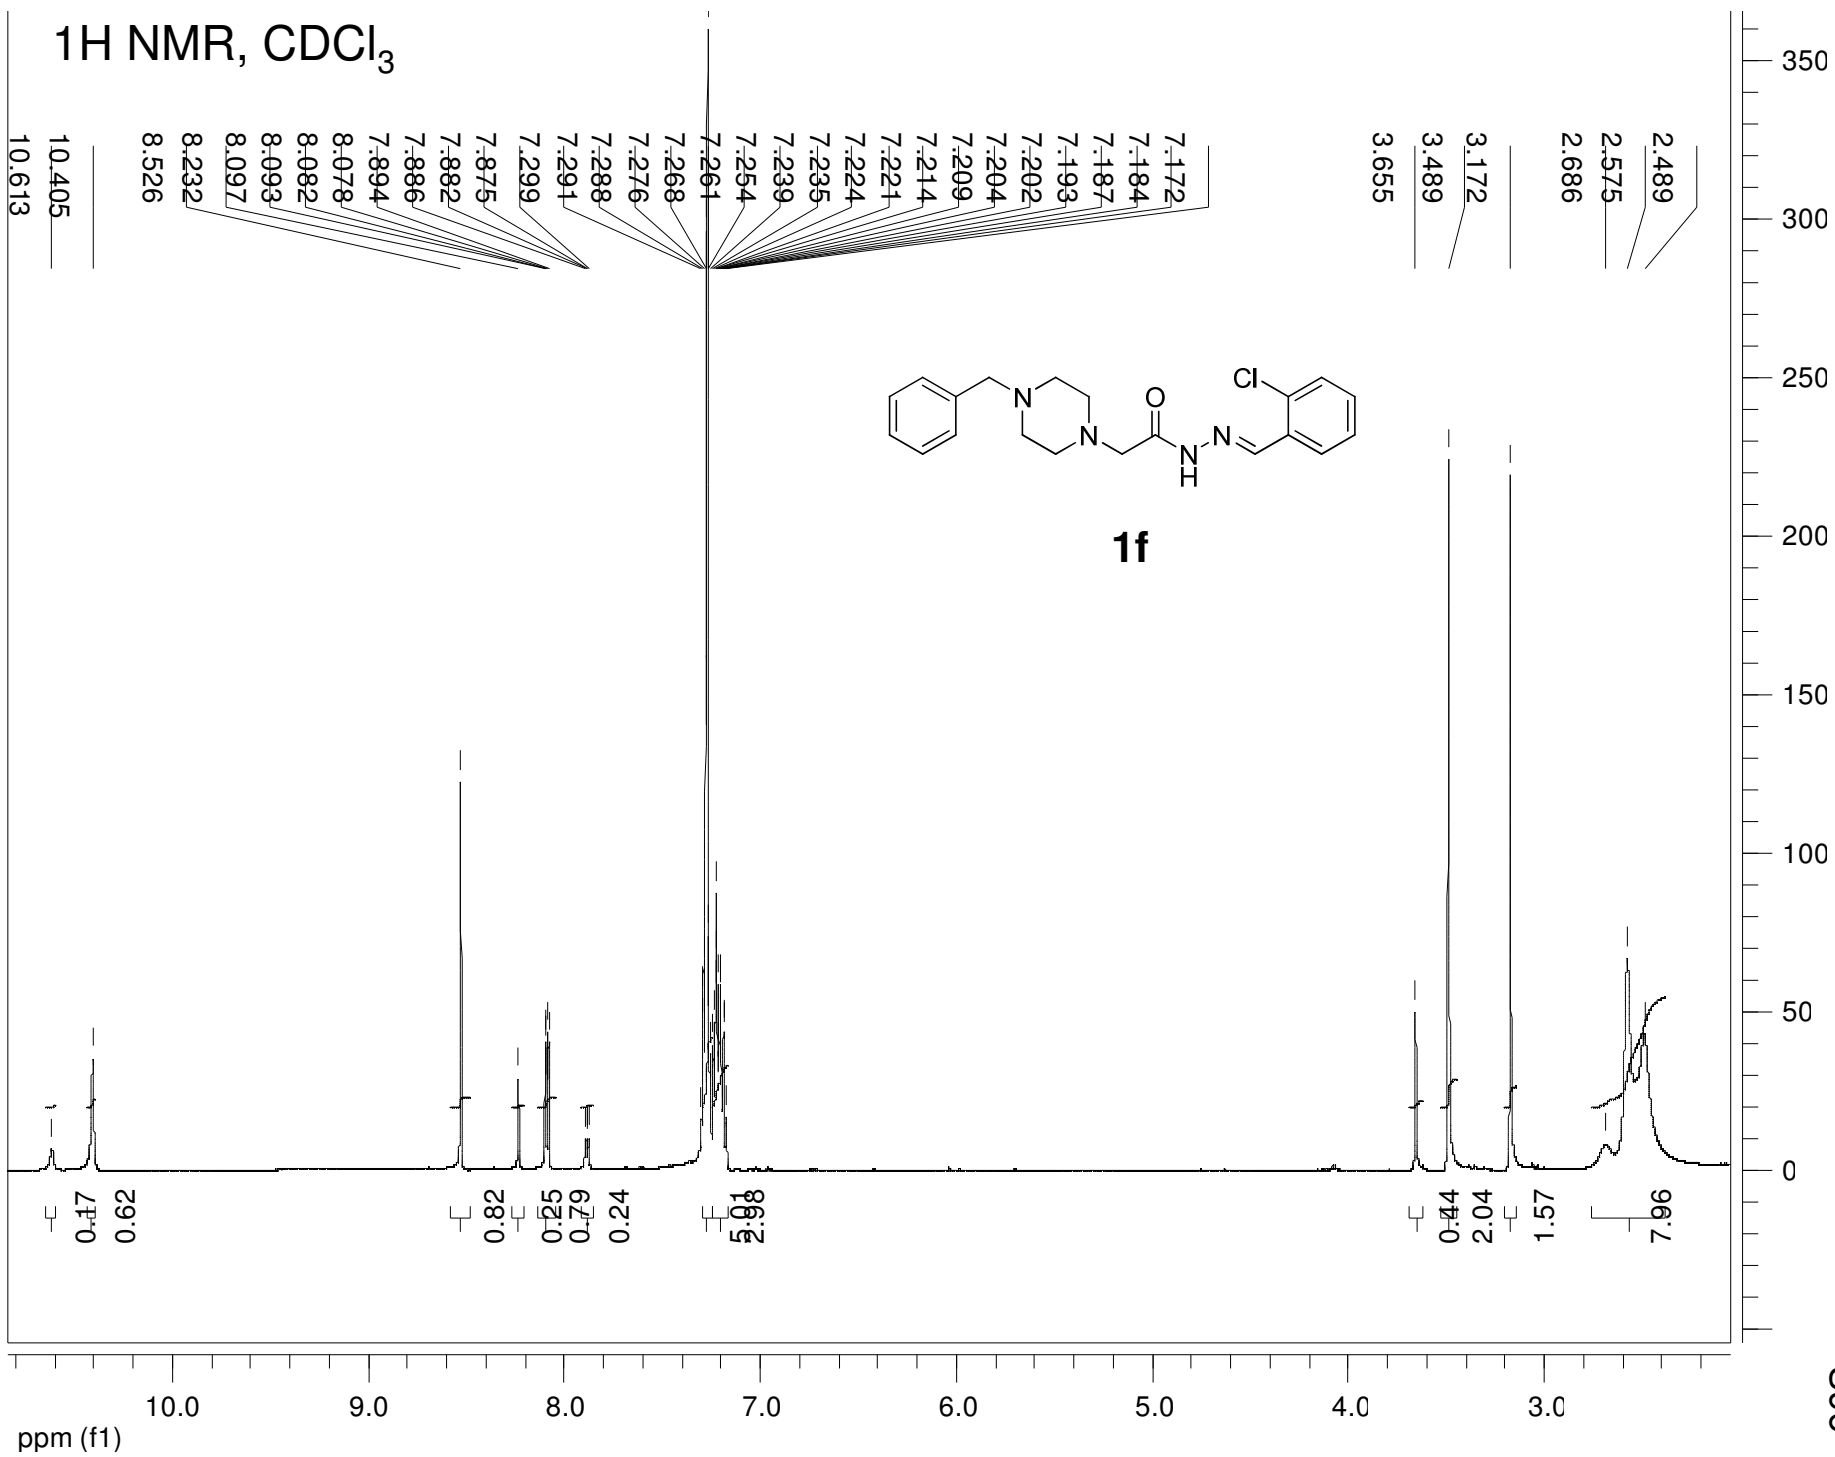

<sup>13</sup>C NMR, CDCl<sub>3</sub>

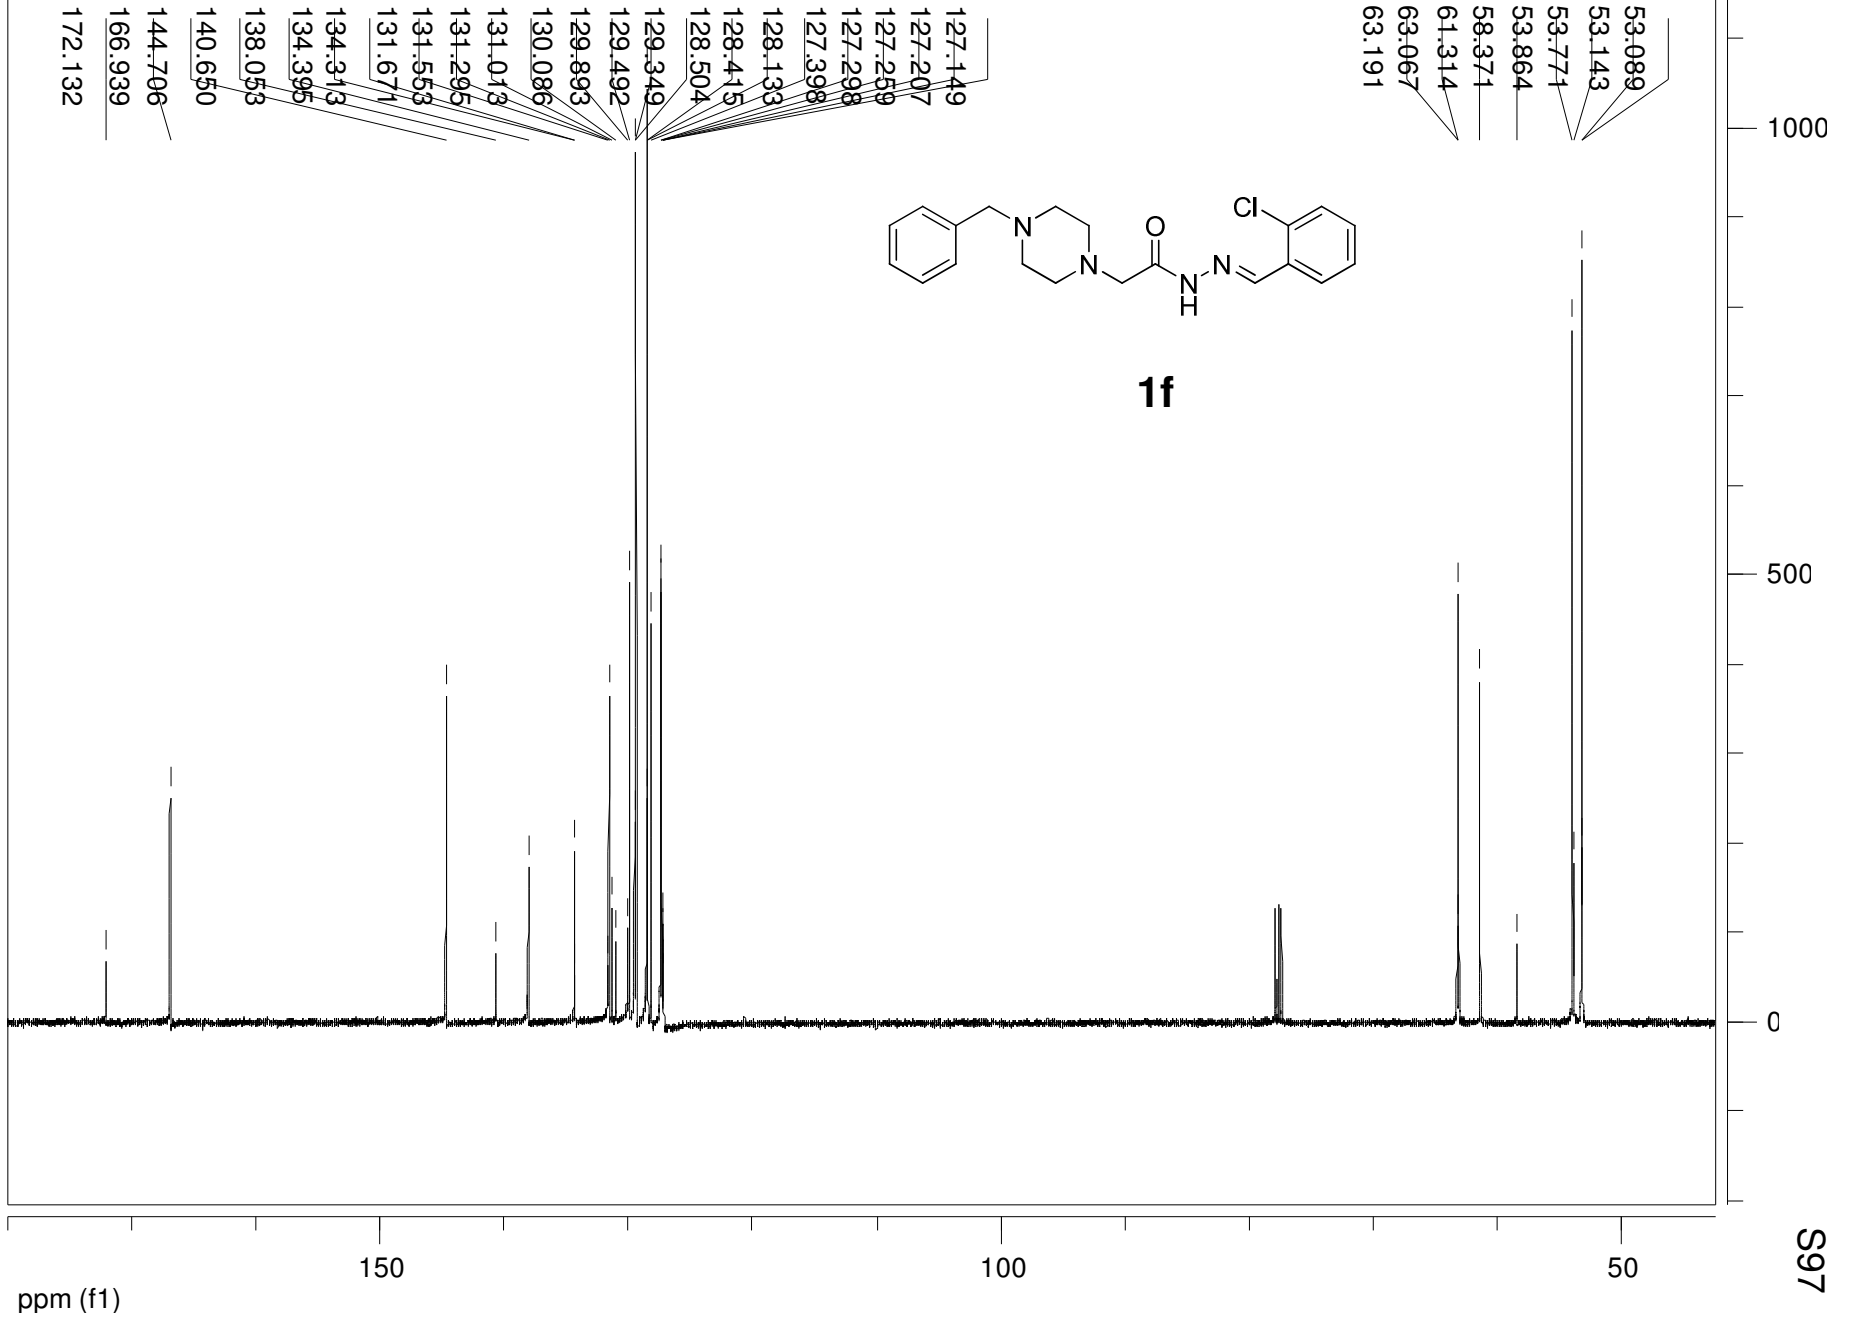

LC-MS

Purity: 98%

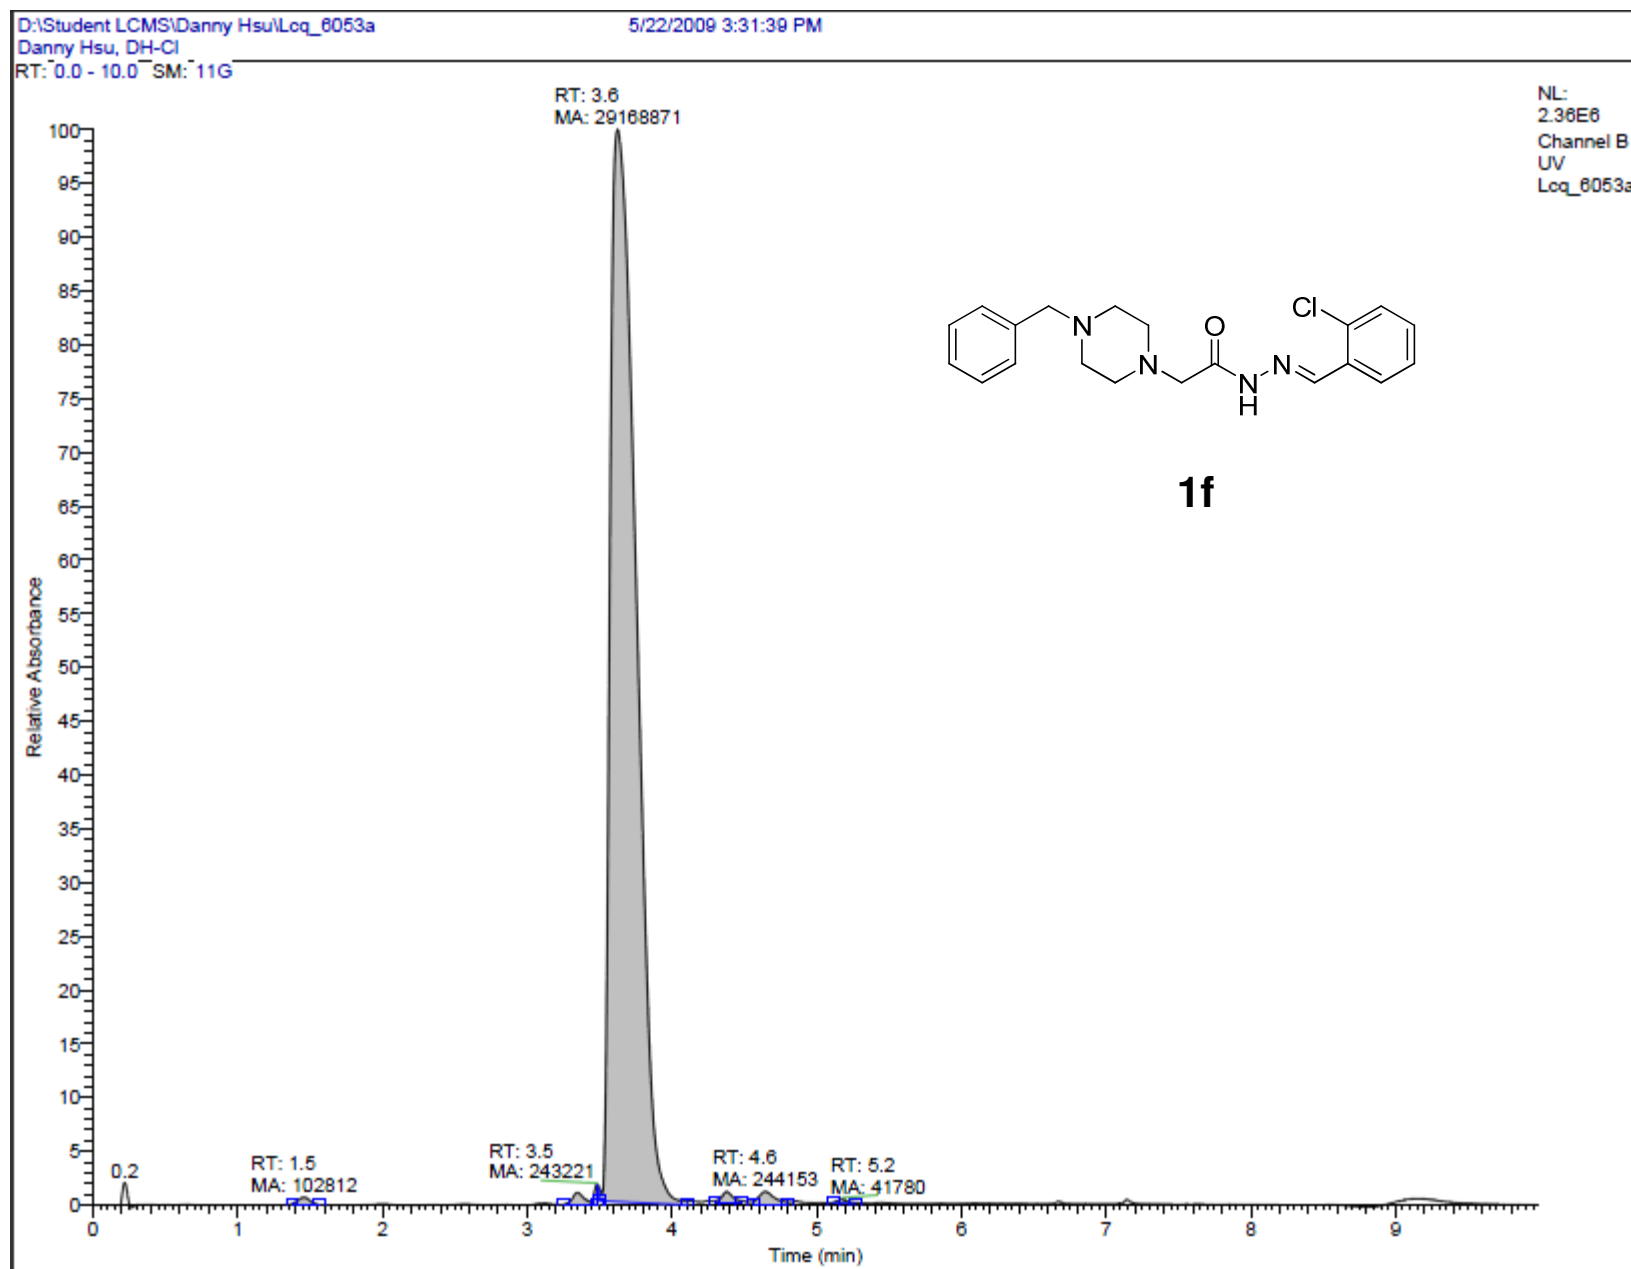

1H NMR, CDCl<sub>3</sub>

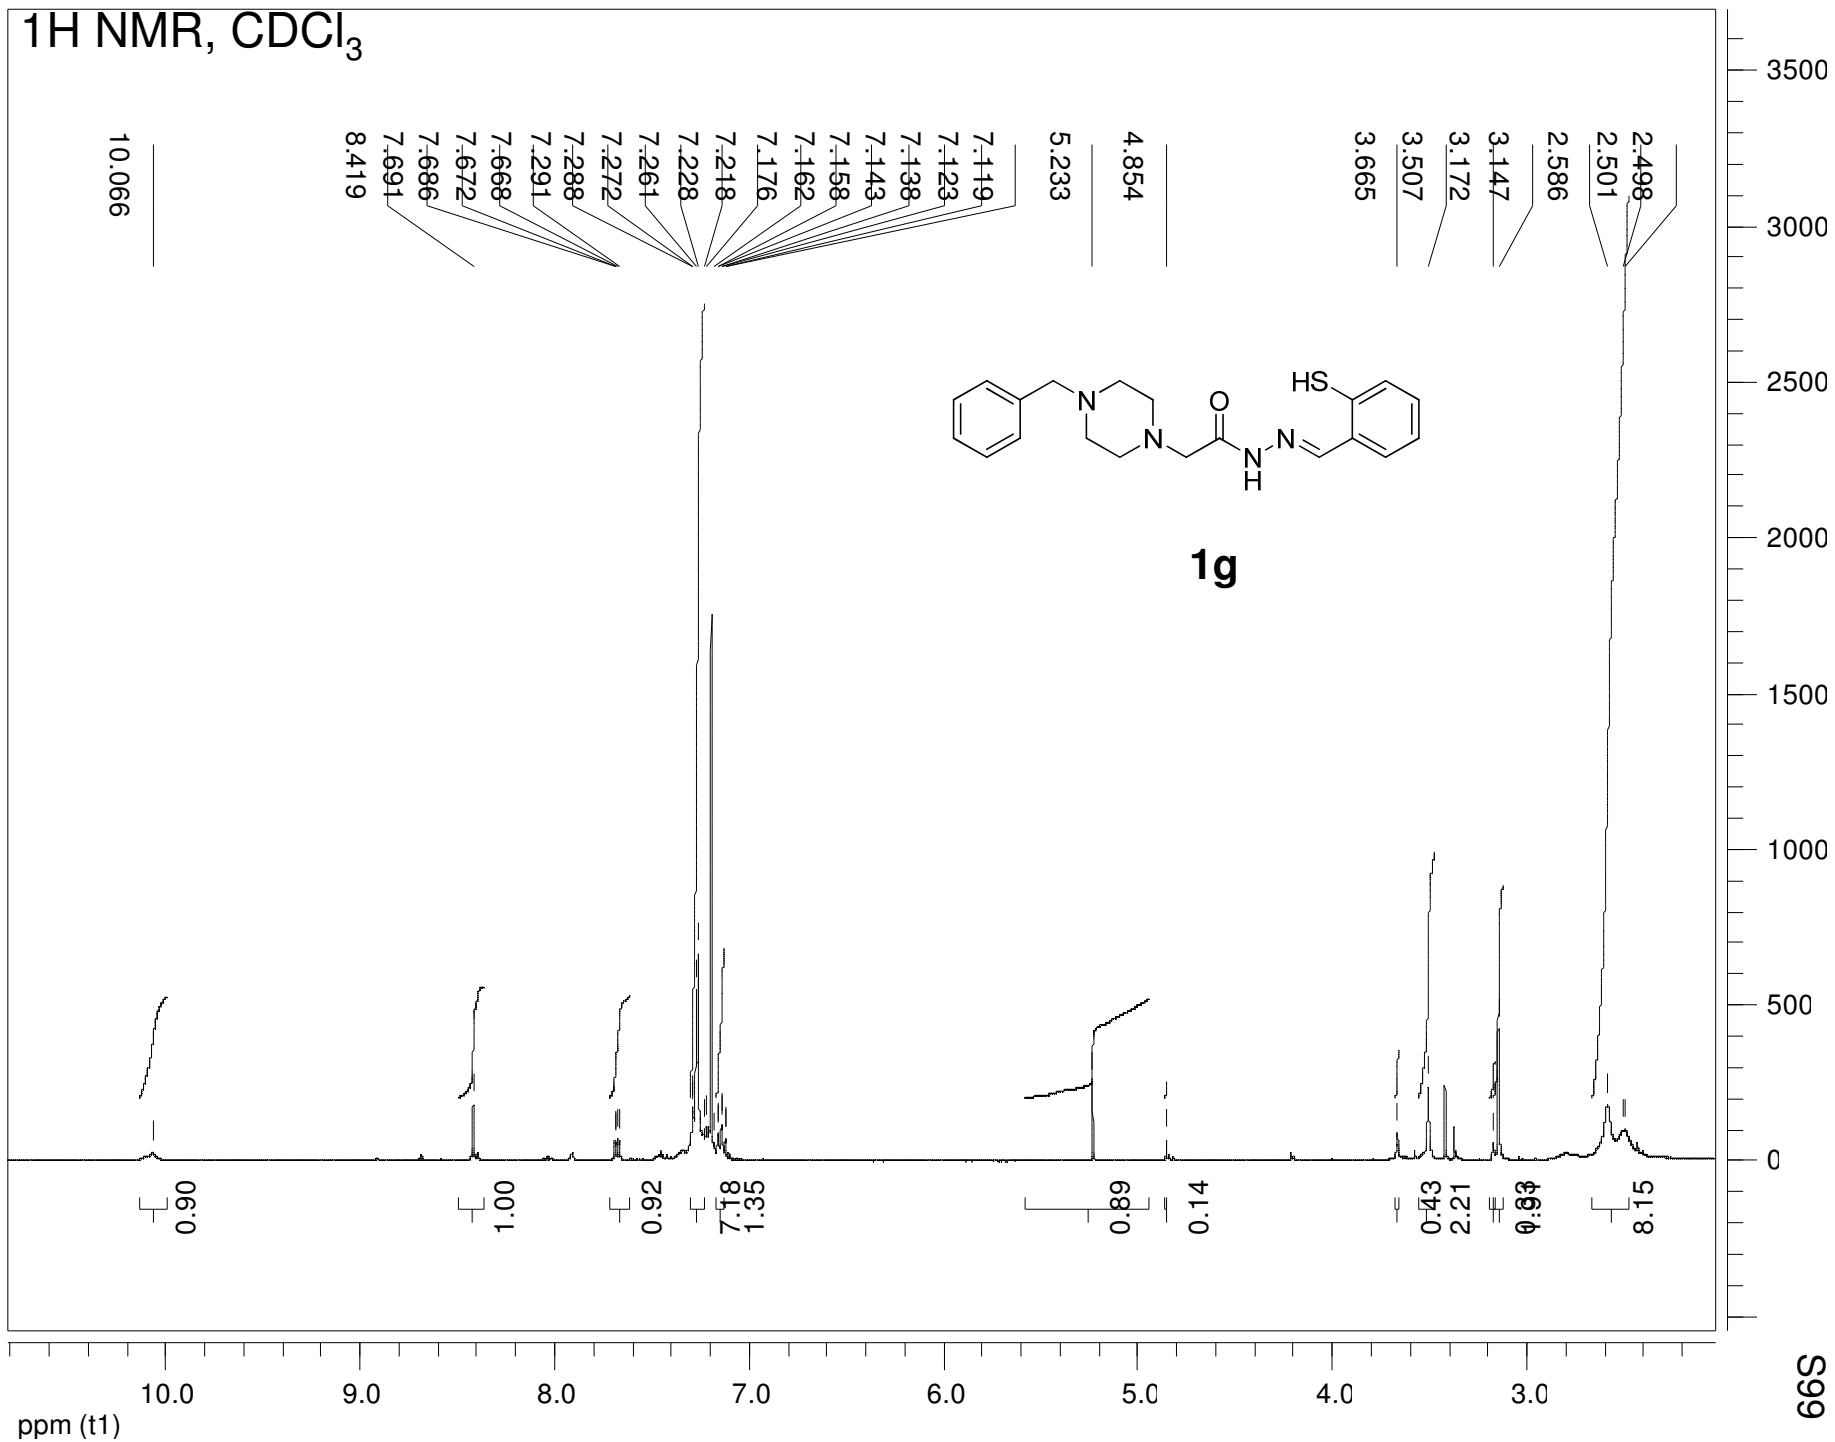

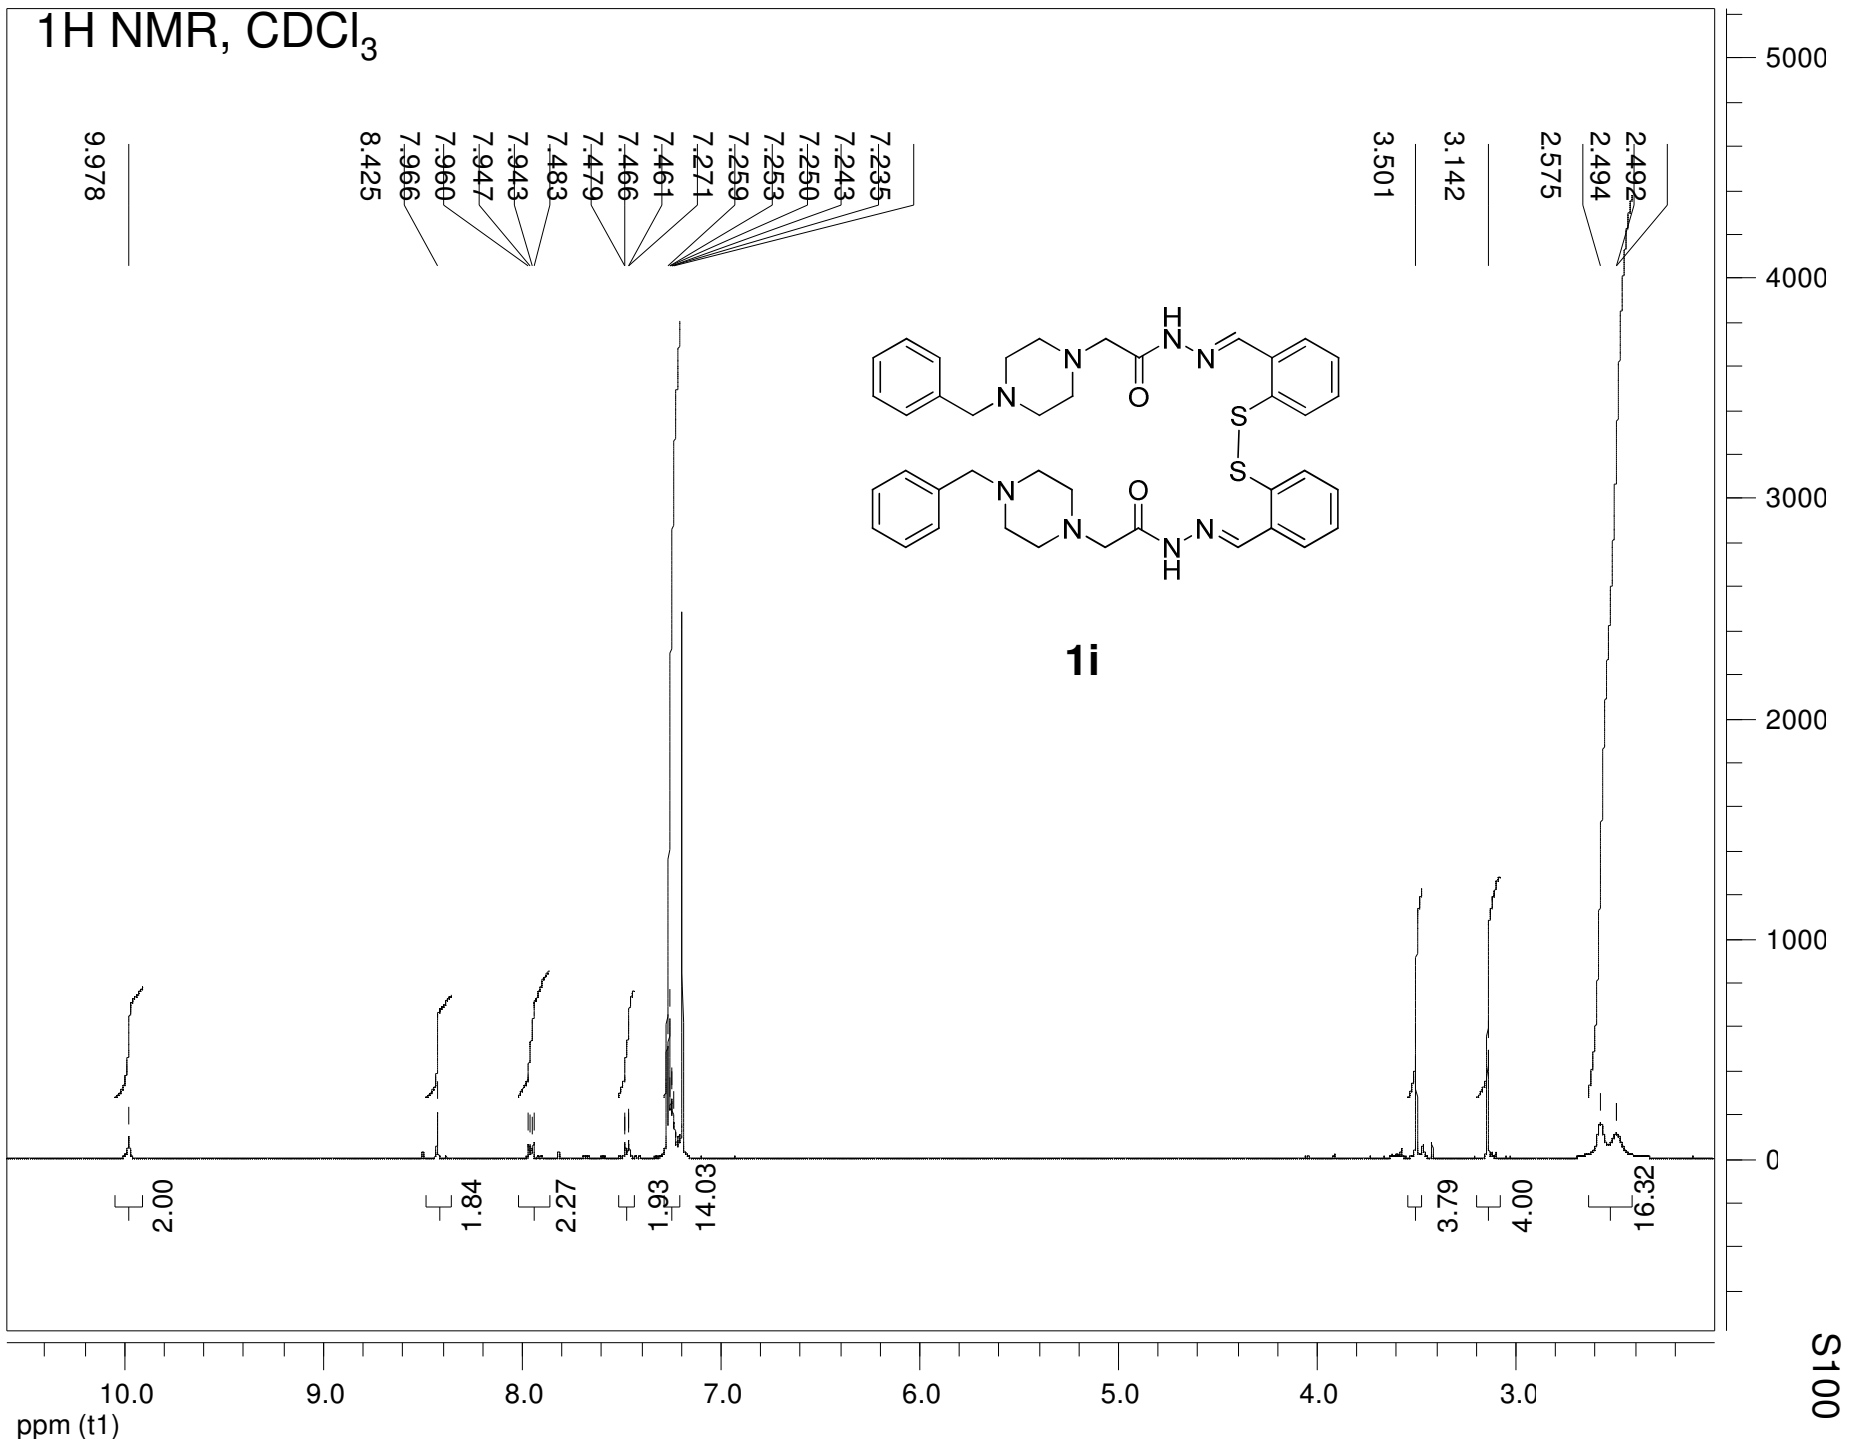



# HPLC

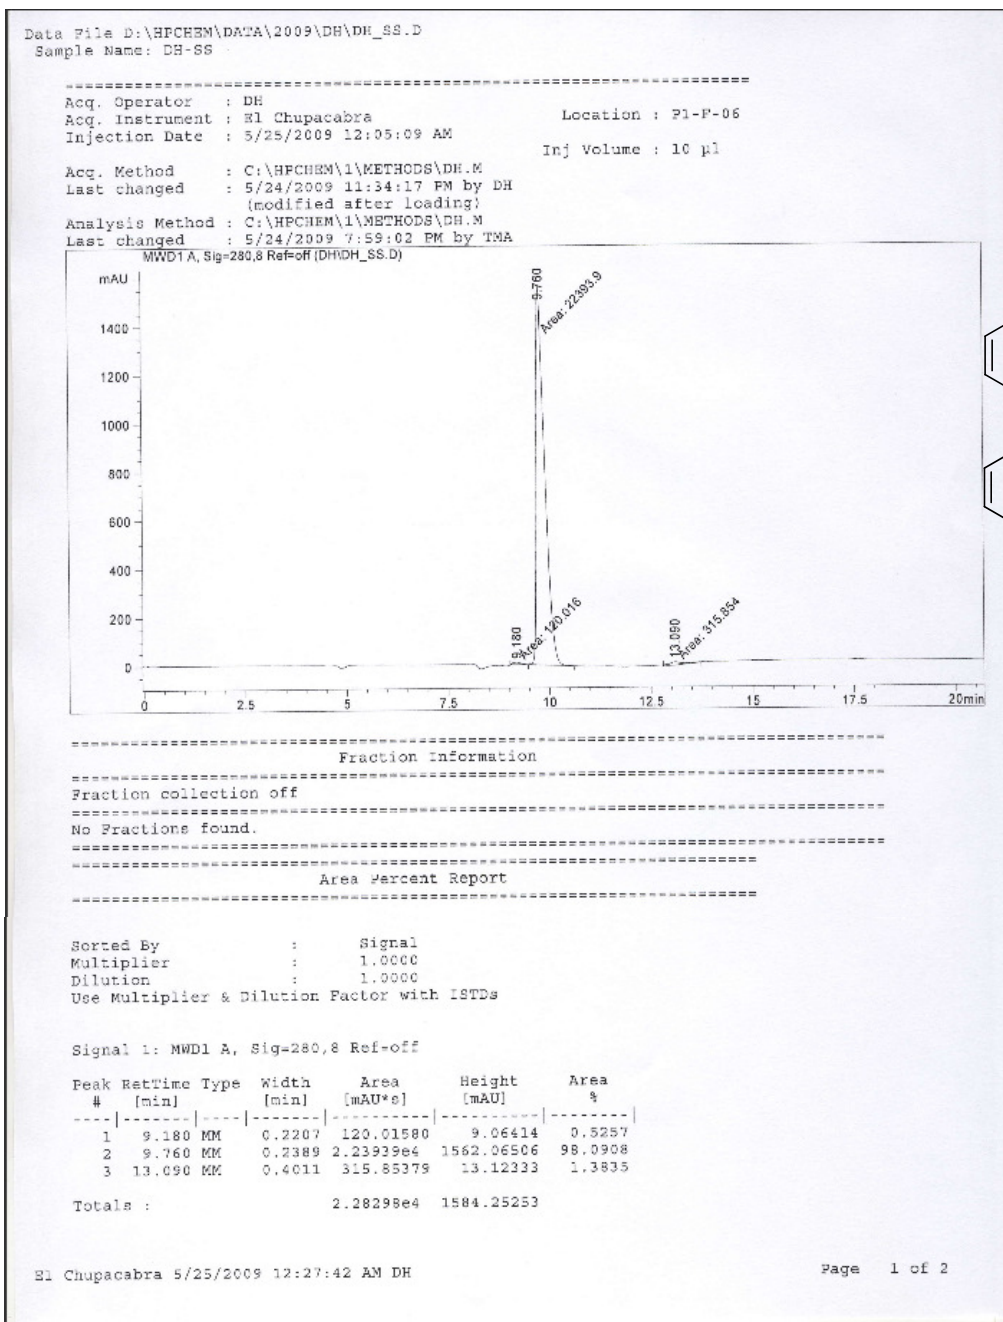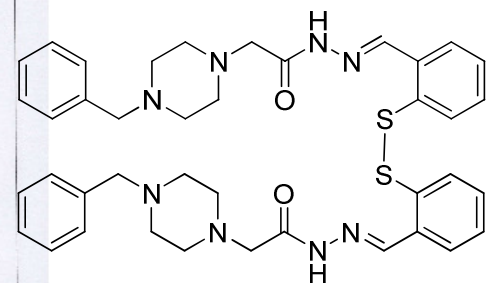

**1i**



<sup>13</sup>C NMR, CDCl<sub>3</sub>

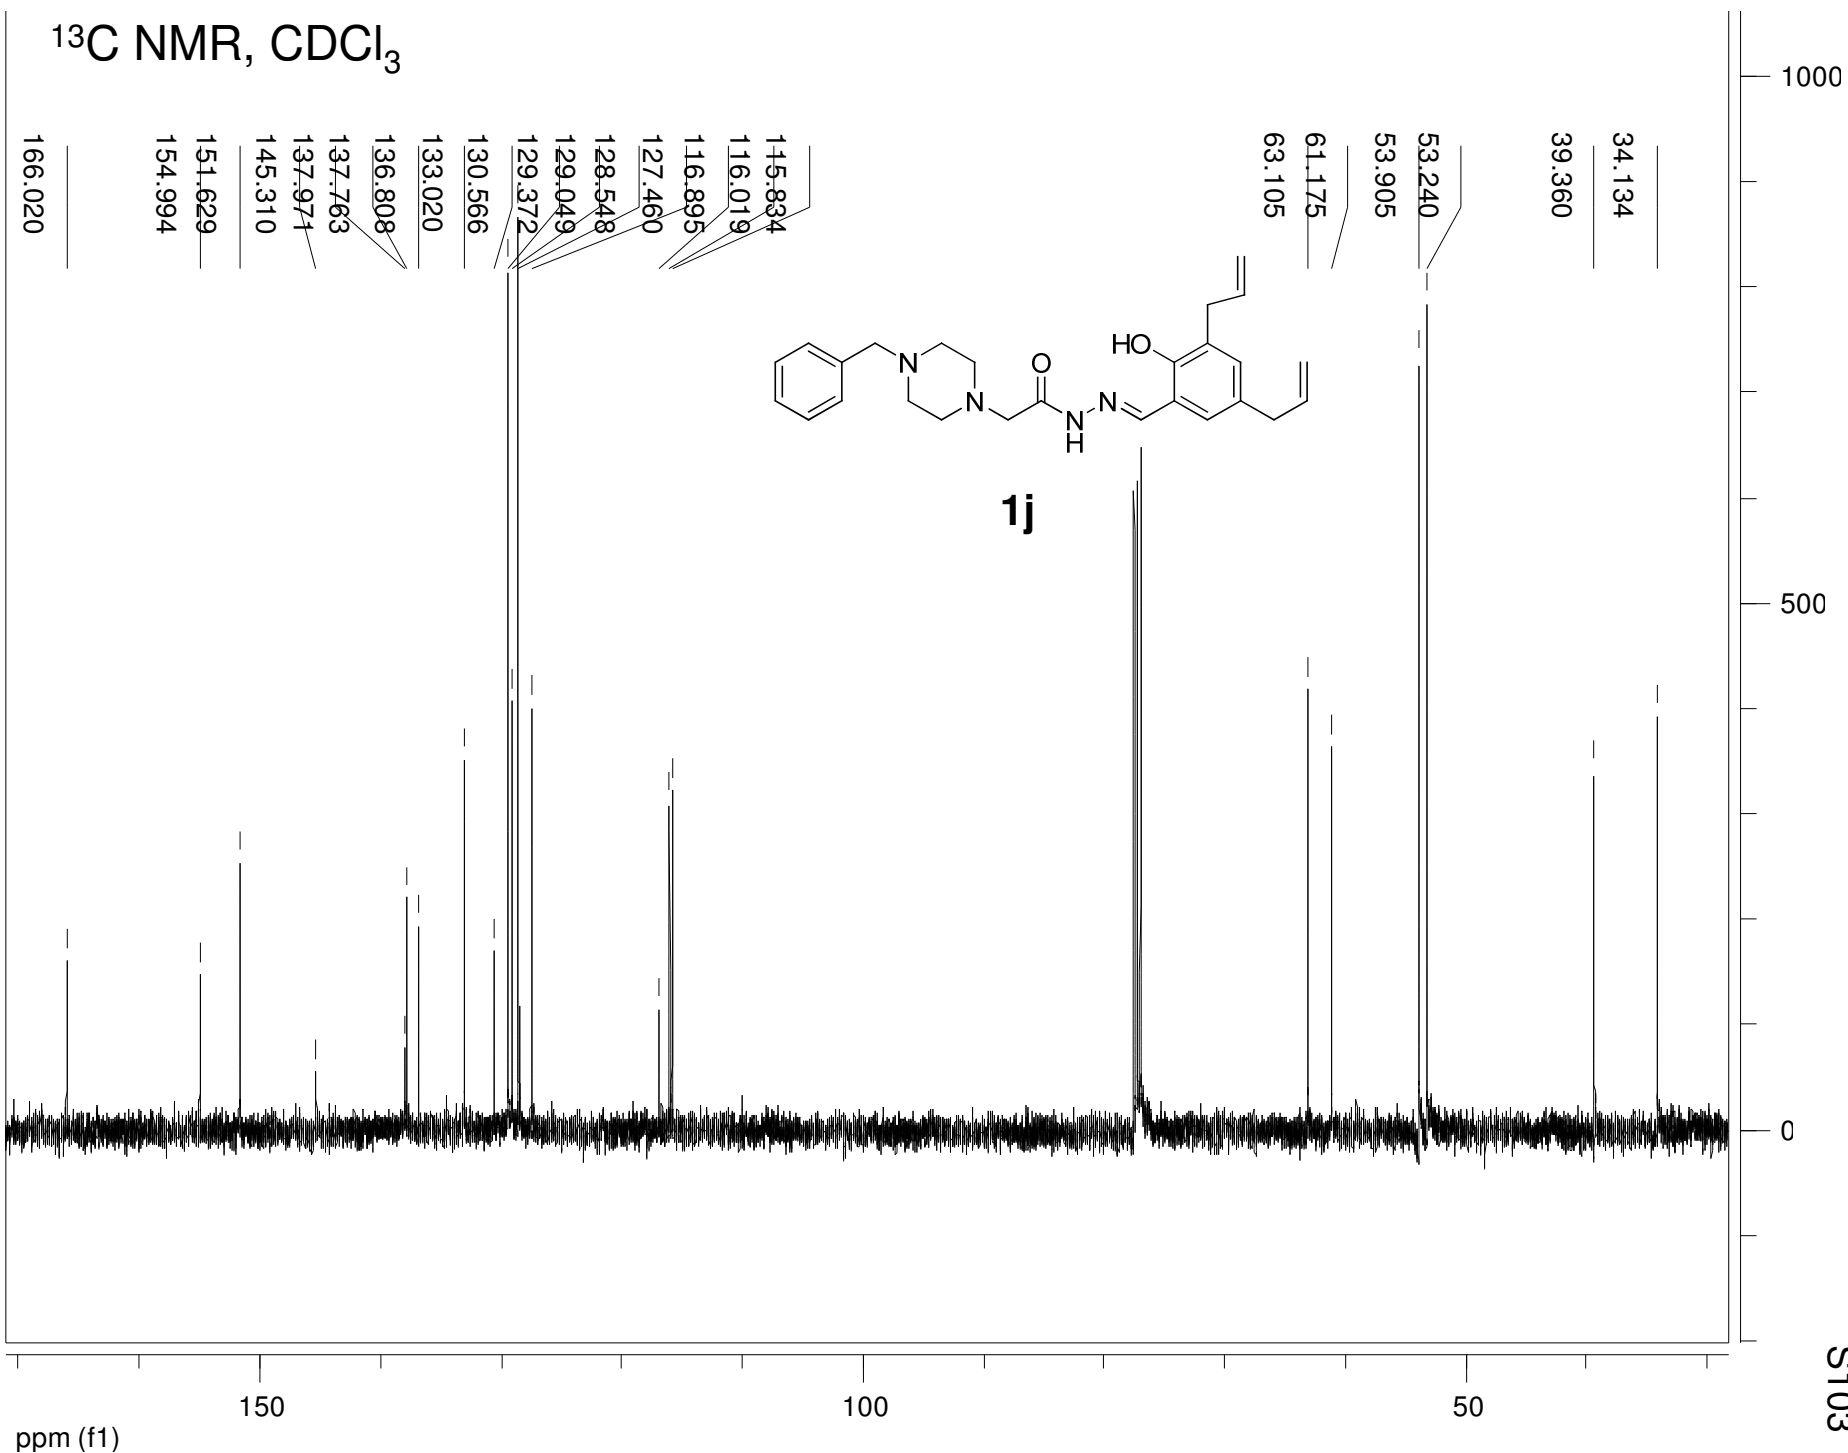

LC-MS

Purity: 95%

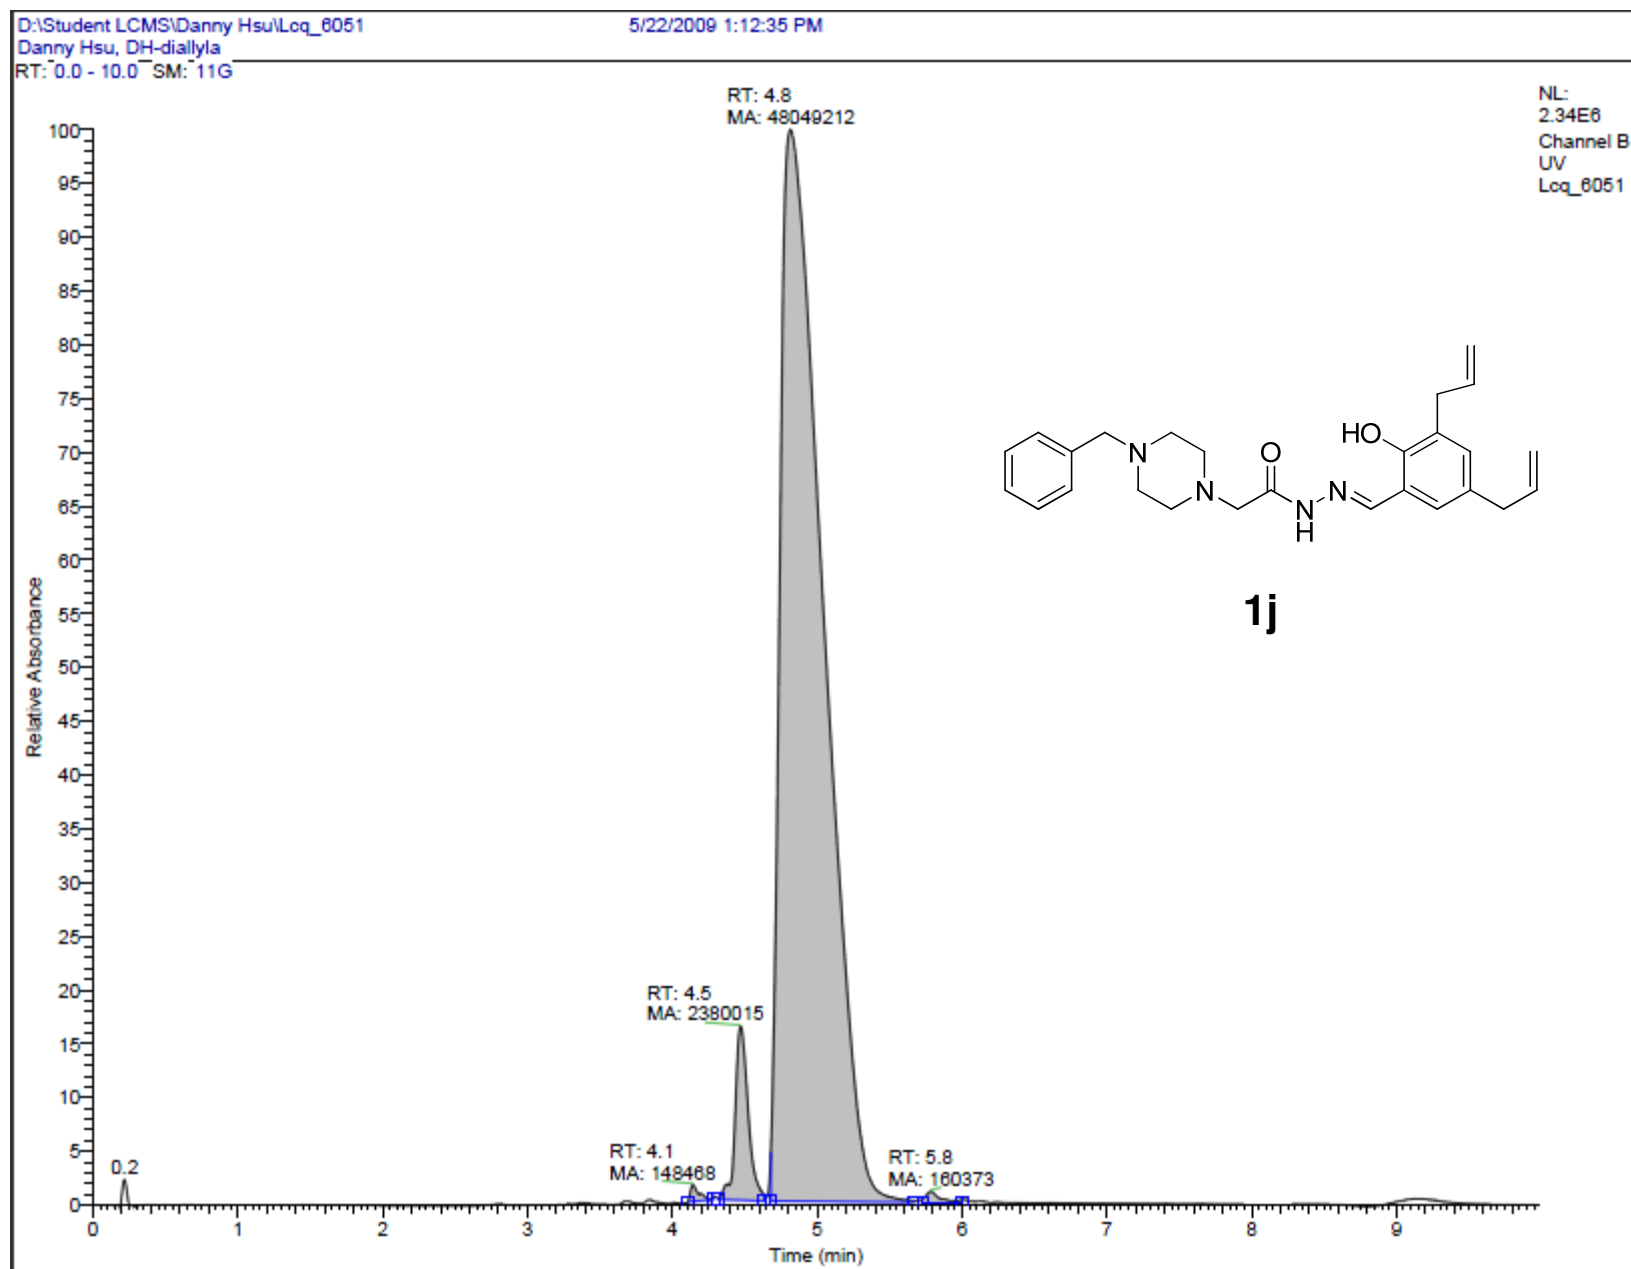



<sup>13</sup>C NMR, CDCl<sub>3</sub>

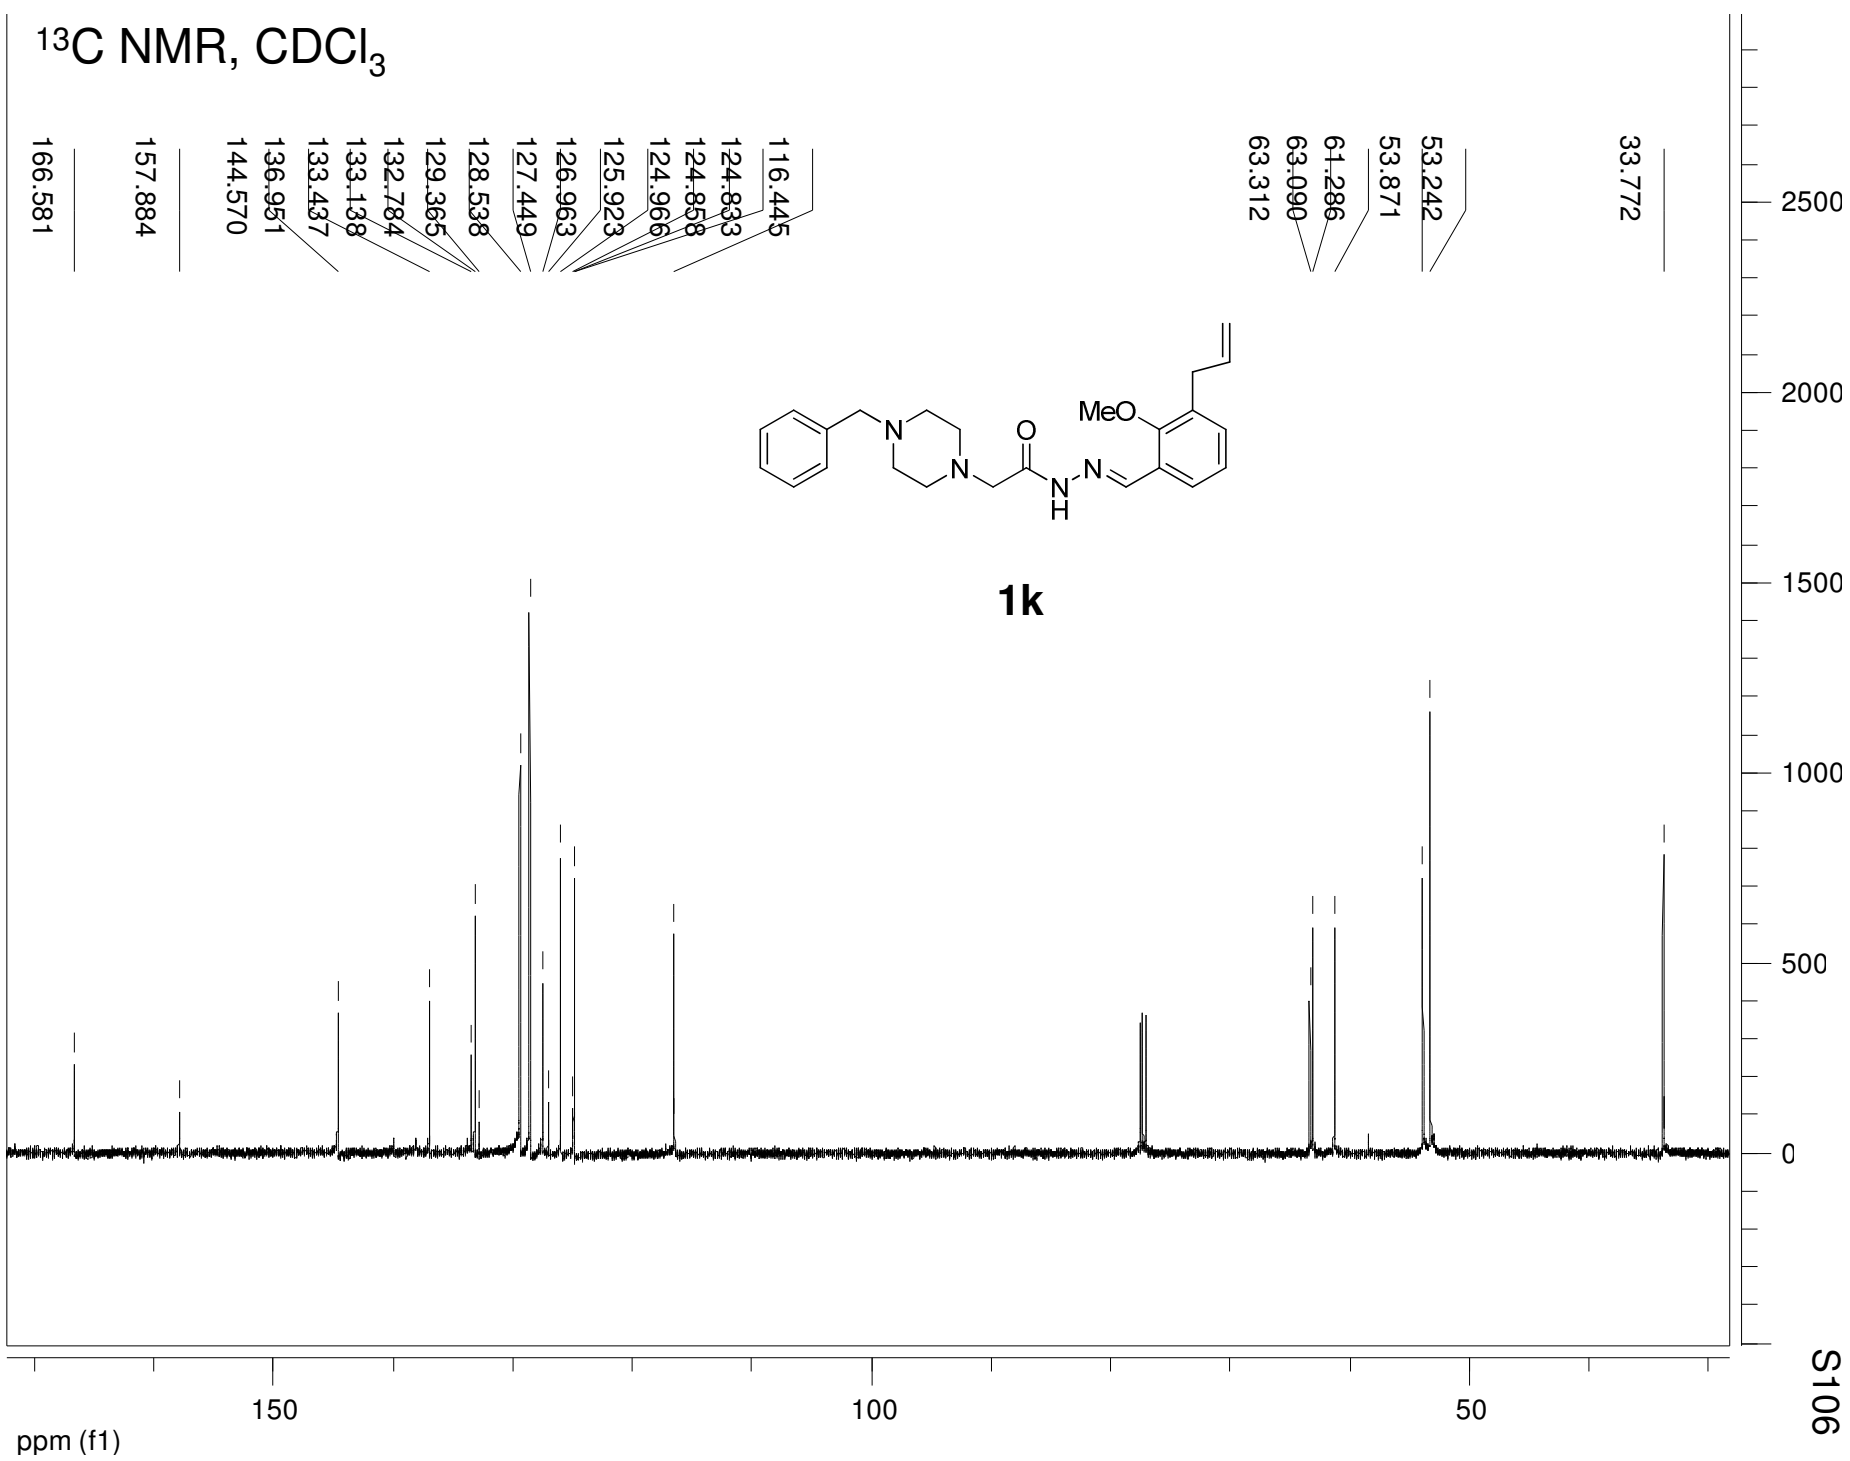

LC-MS

Purity: 98%

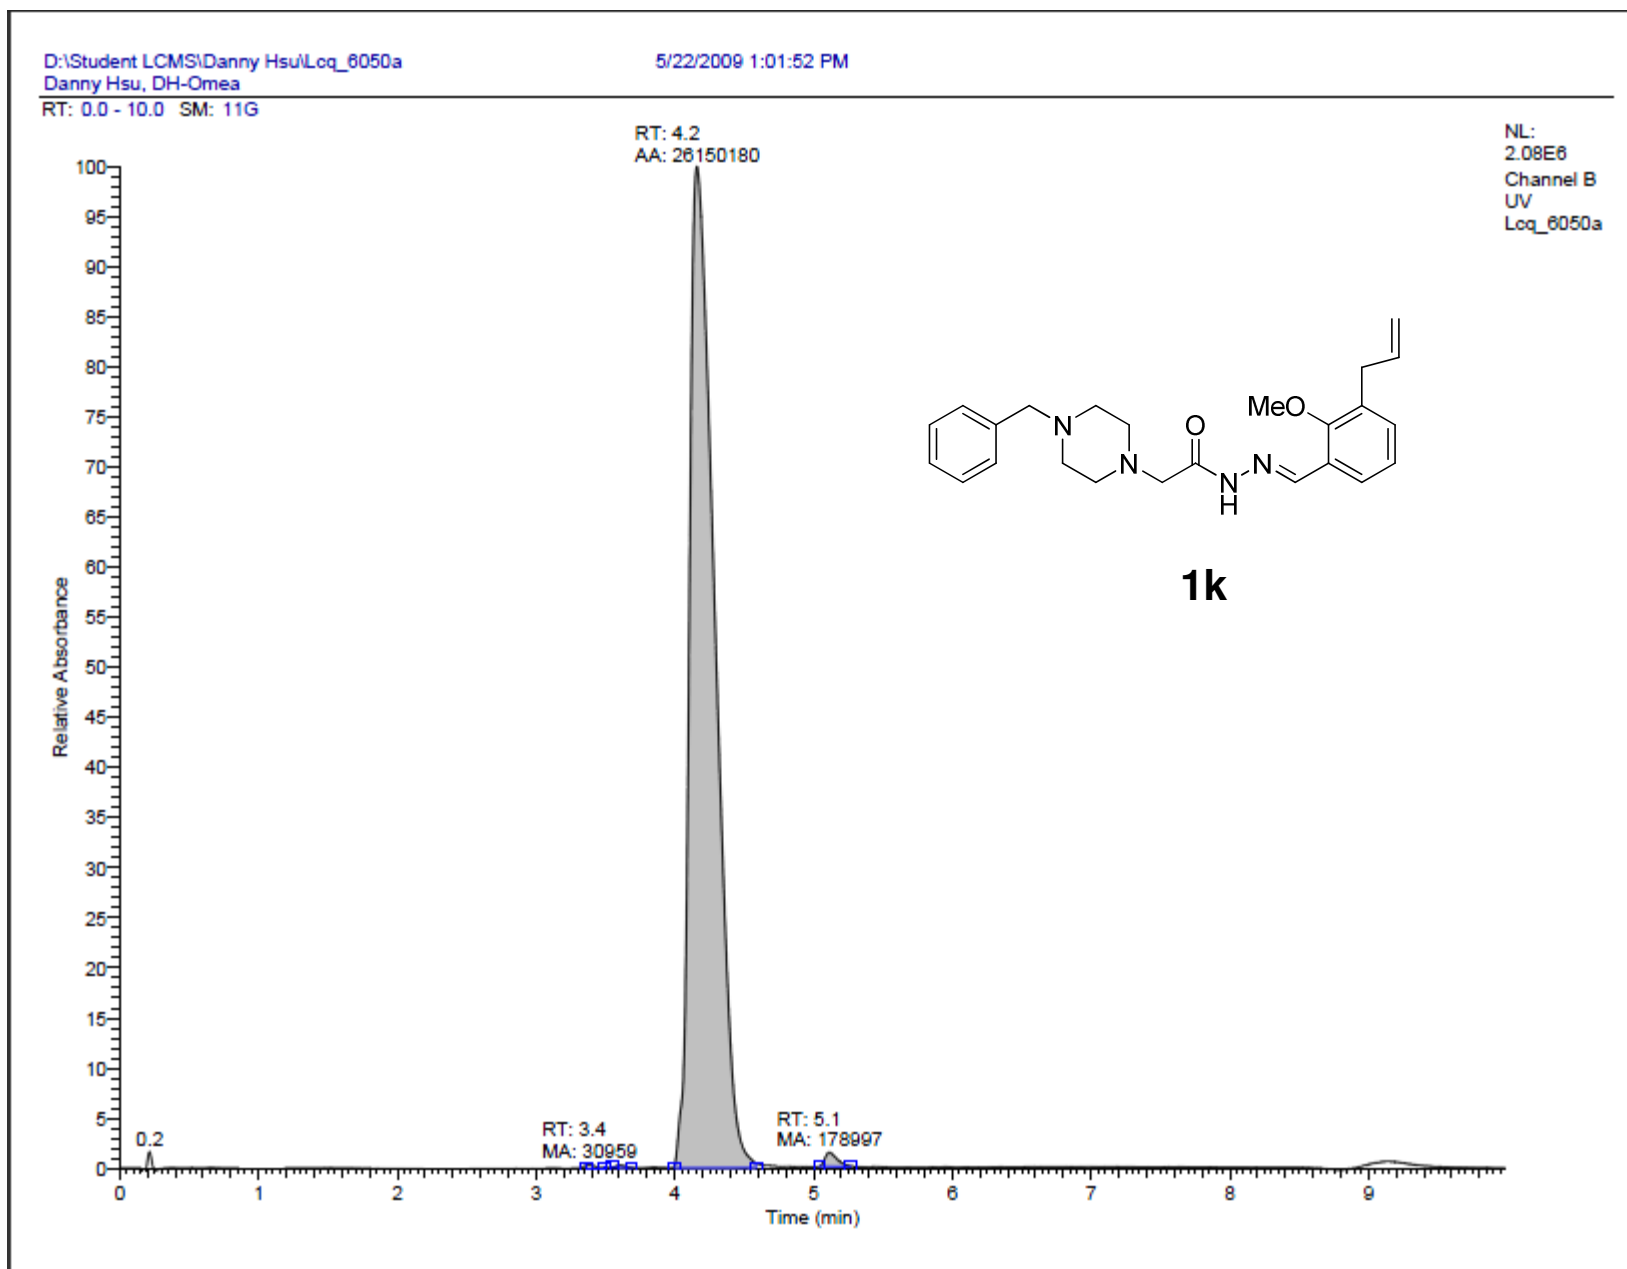

1H NMR, CDCl<sub>3</sub>

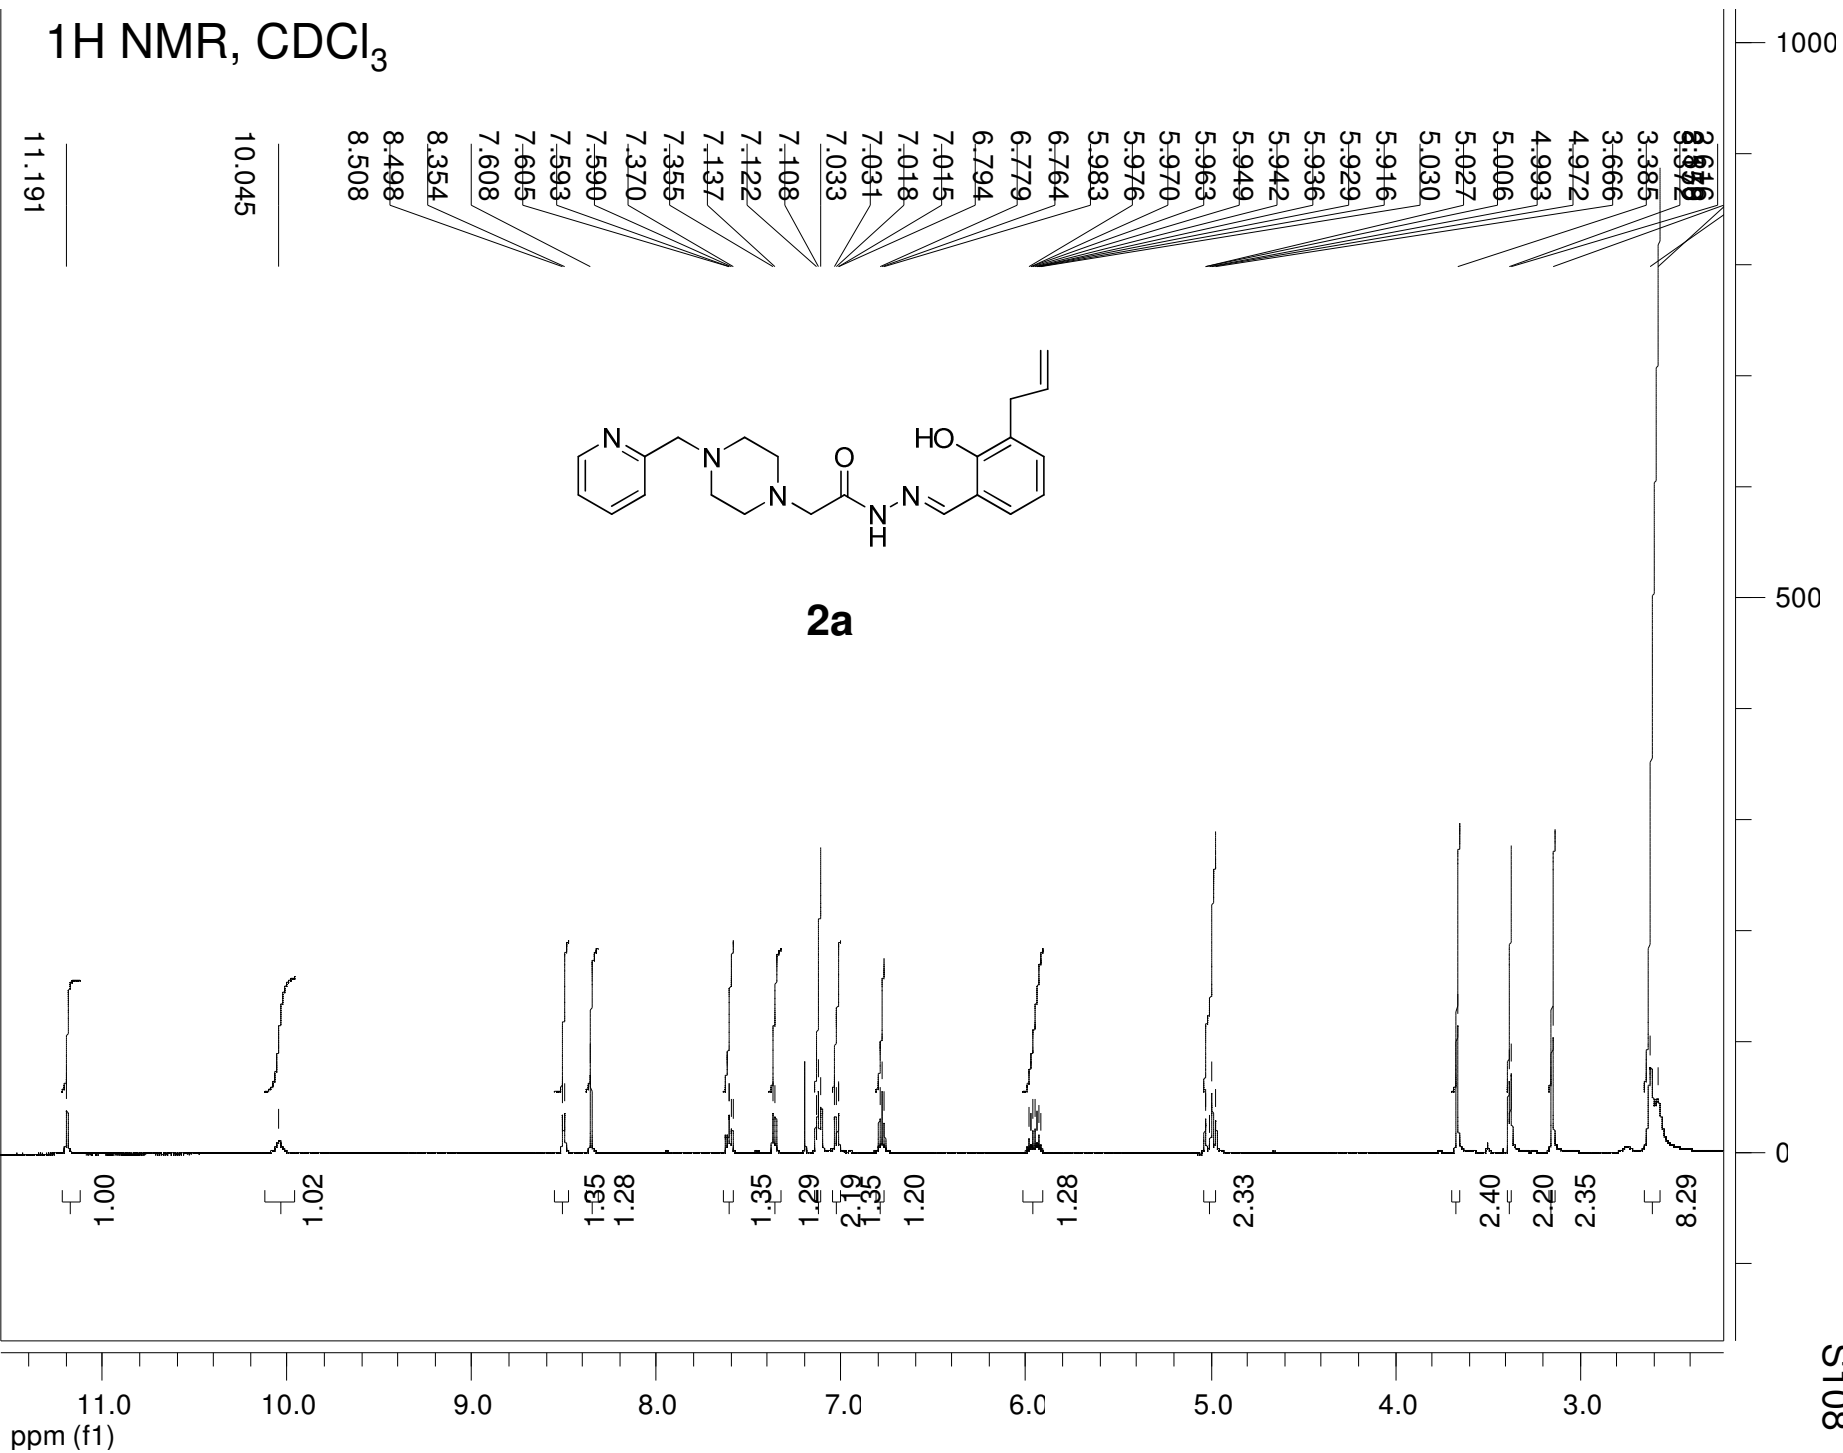



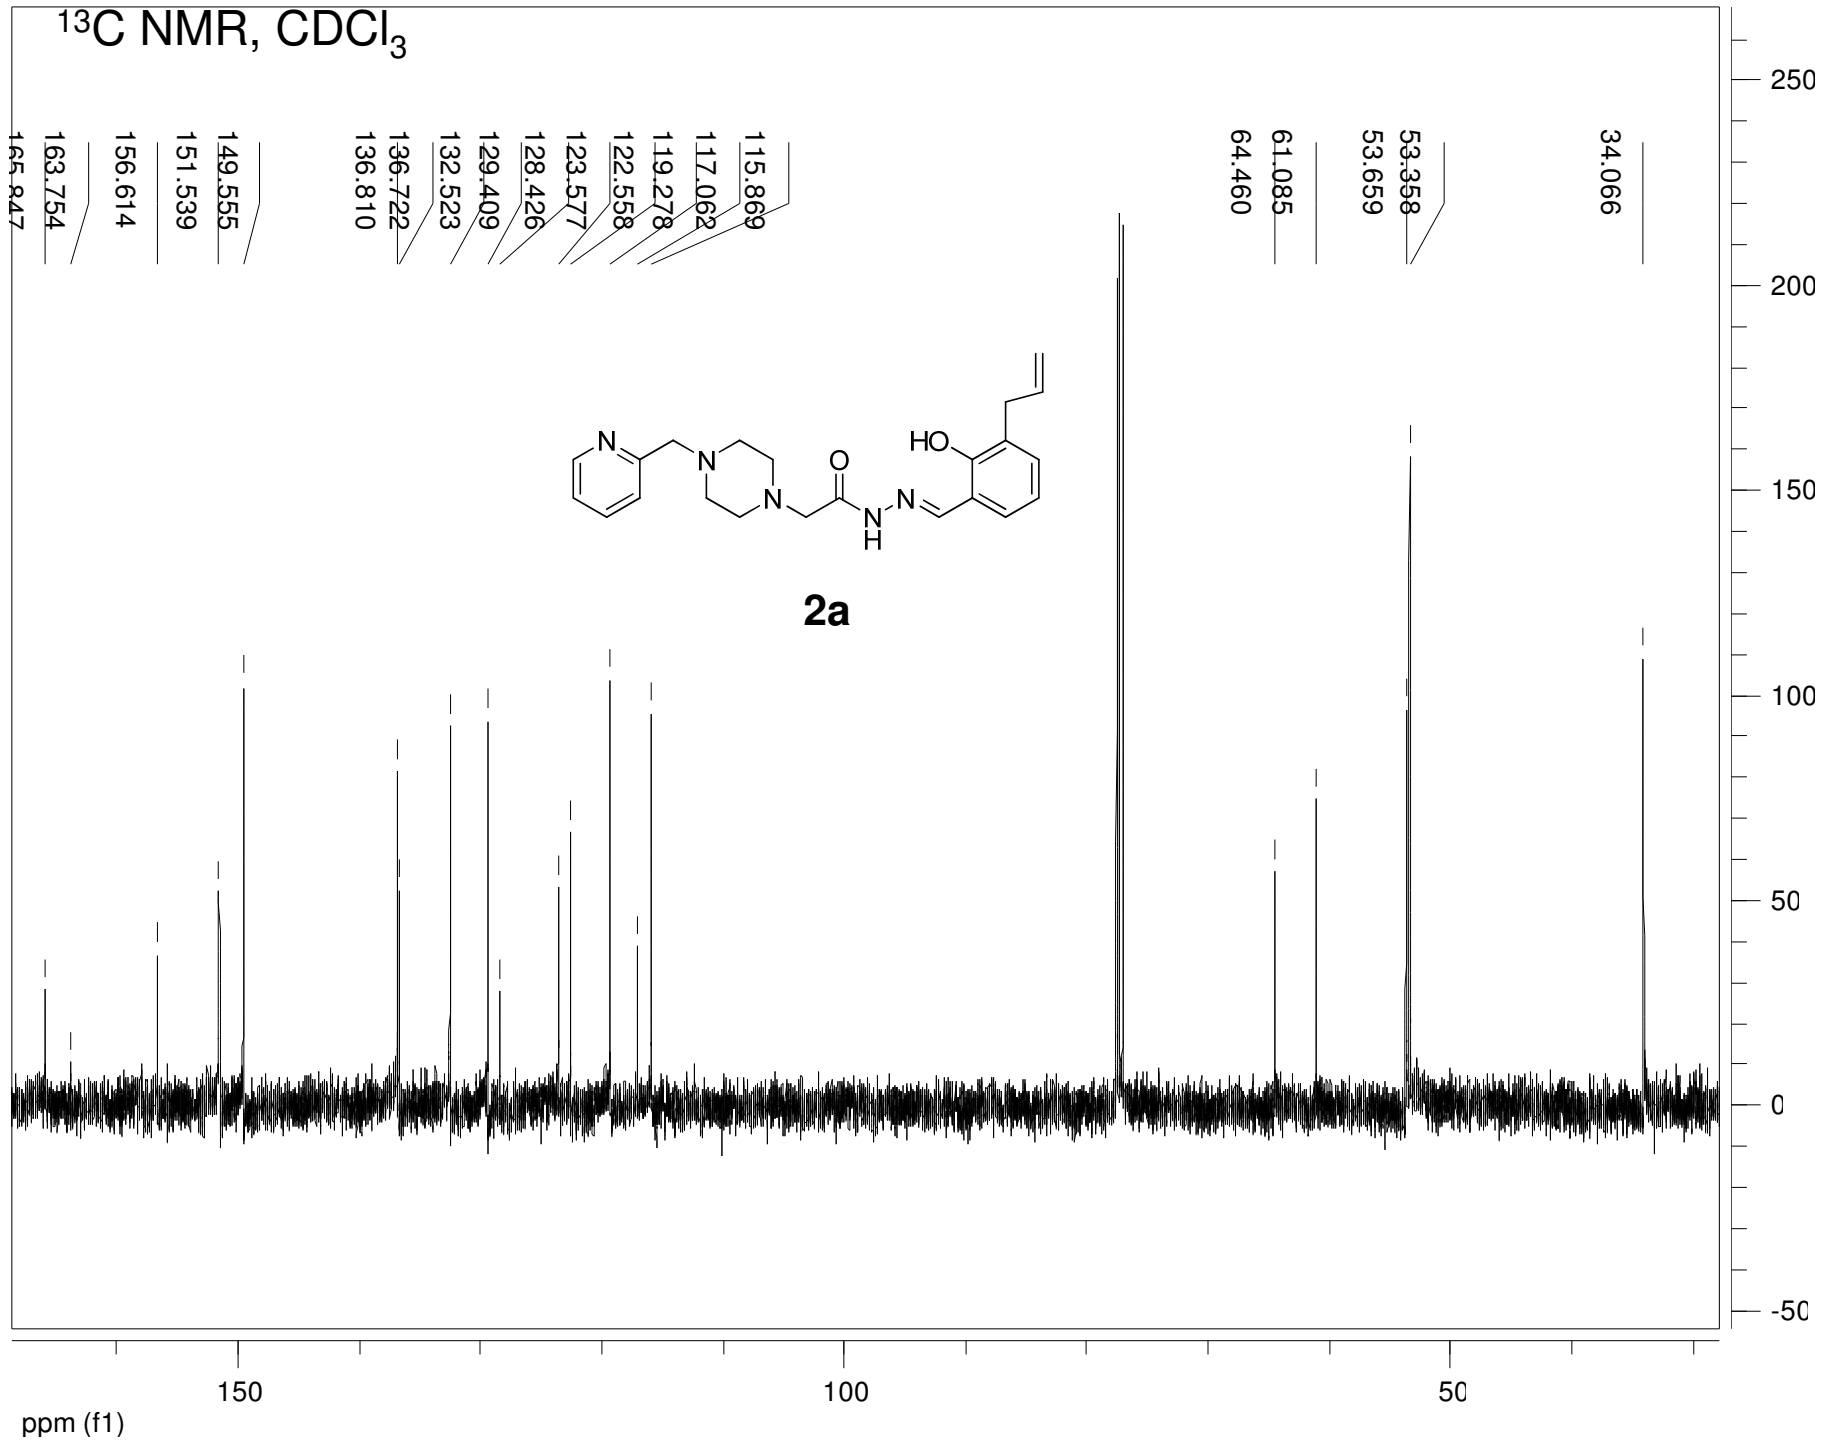

# HPLC

\* RUN # 430      JAN 7, 2008 22:31:15  
START

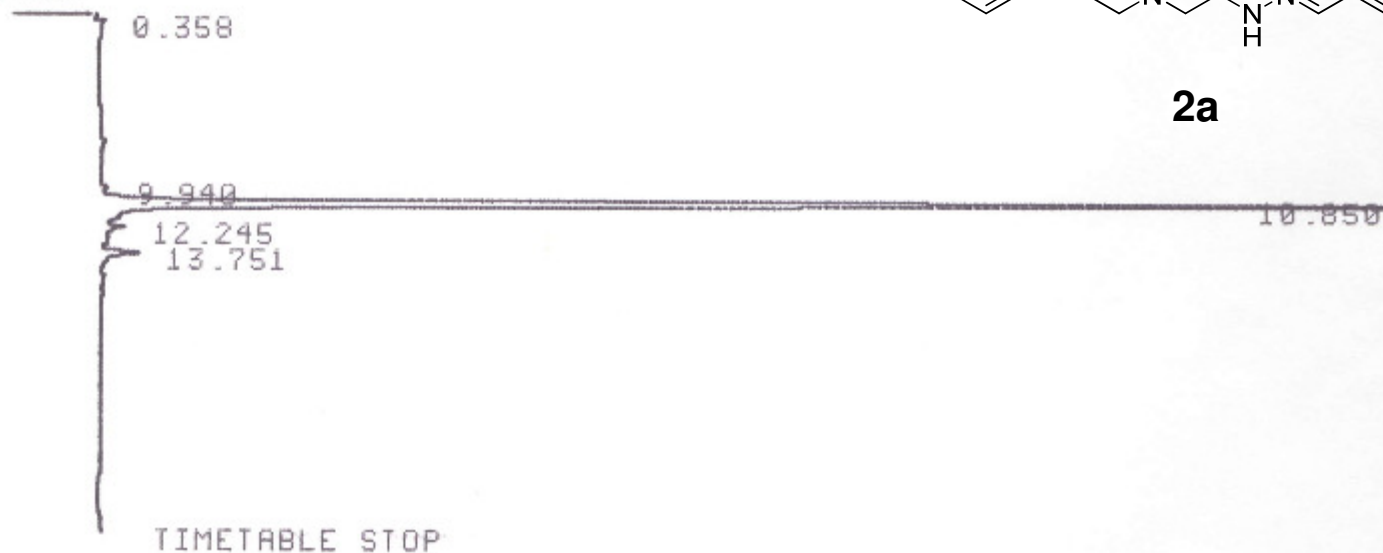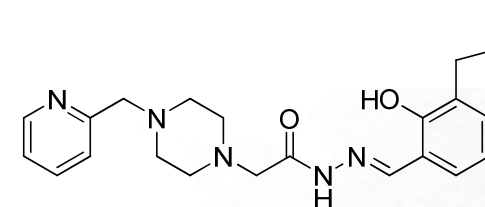

**2a**

RUN# 430      JAN 7, 2008 22:31:15

## AREAX

| RT     | AREA     | TYPE | WIDTH | AREAX    |
|--------|----------|------|-------|----------|
| .358   | 156343   | BB   | .167  | .35943   |
| 9.940  | 90278    | BP   | .166  | .20755   |
| 10.850 | 41843424 | PB   | .281  | 96.19763 |
| 12.245 | 364354   | PP   | .209  | .83765   |
| 13.751 | 1042960  | BU   | .308  | 2.39776  |

TOTAL AREA=4.3497E+07  
MUL FACTOR=1.0000E+00

1H NMR, CDCl<sub>3</sub>

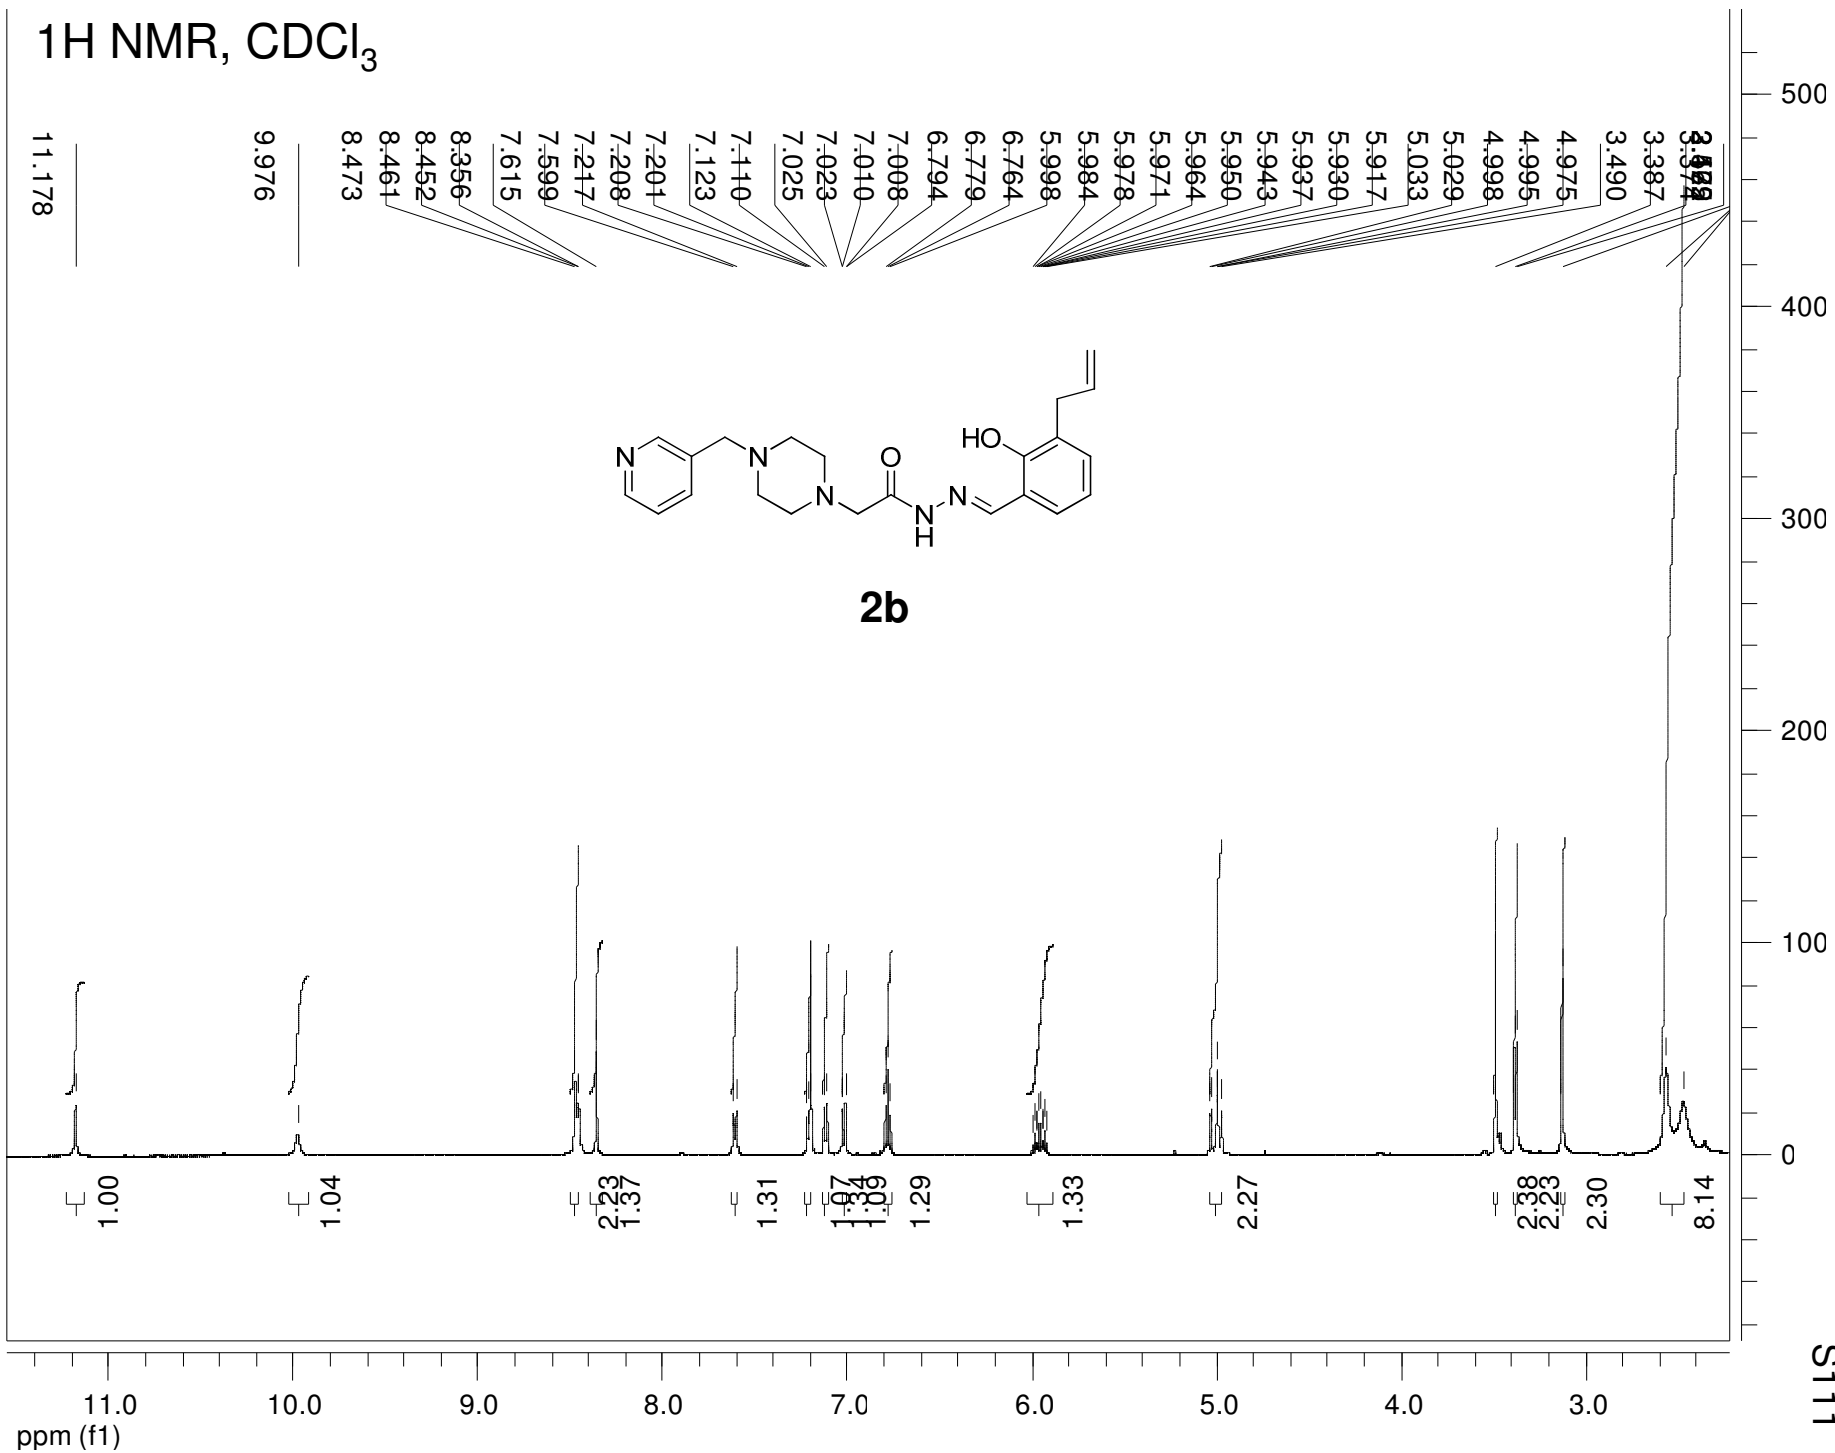

<sup>13</sup>C NMR, CDCl<sub>3</sub>

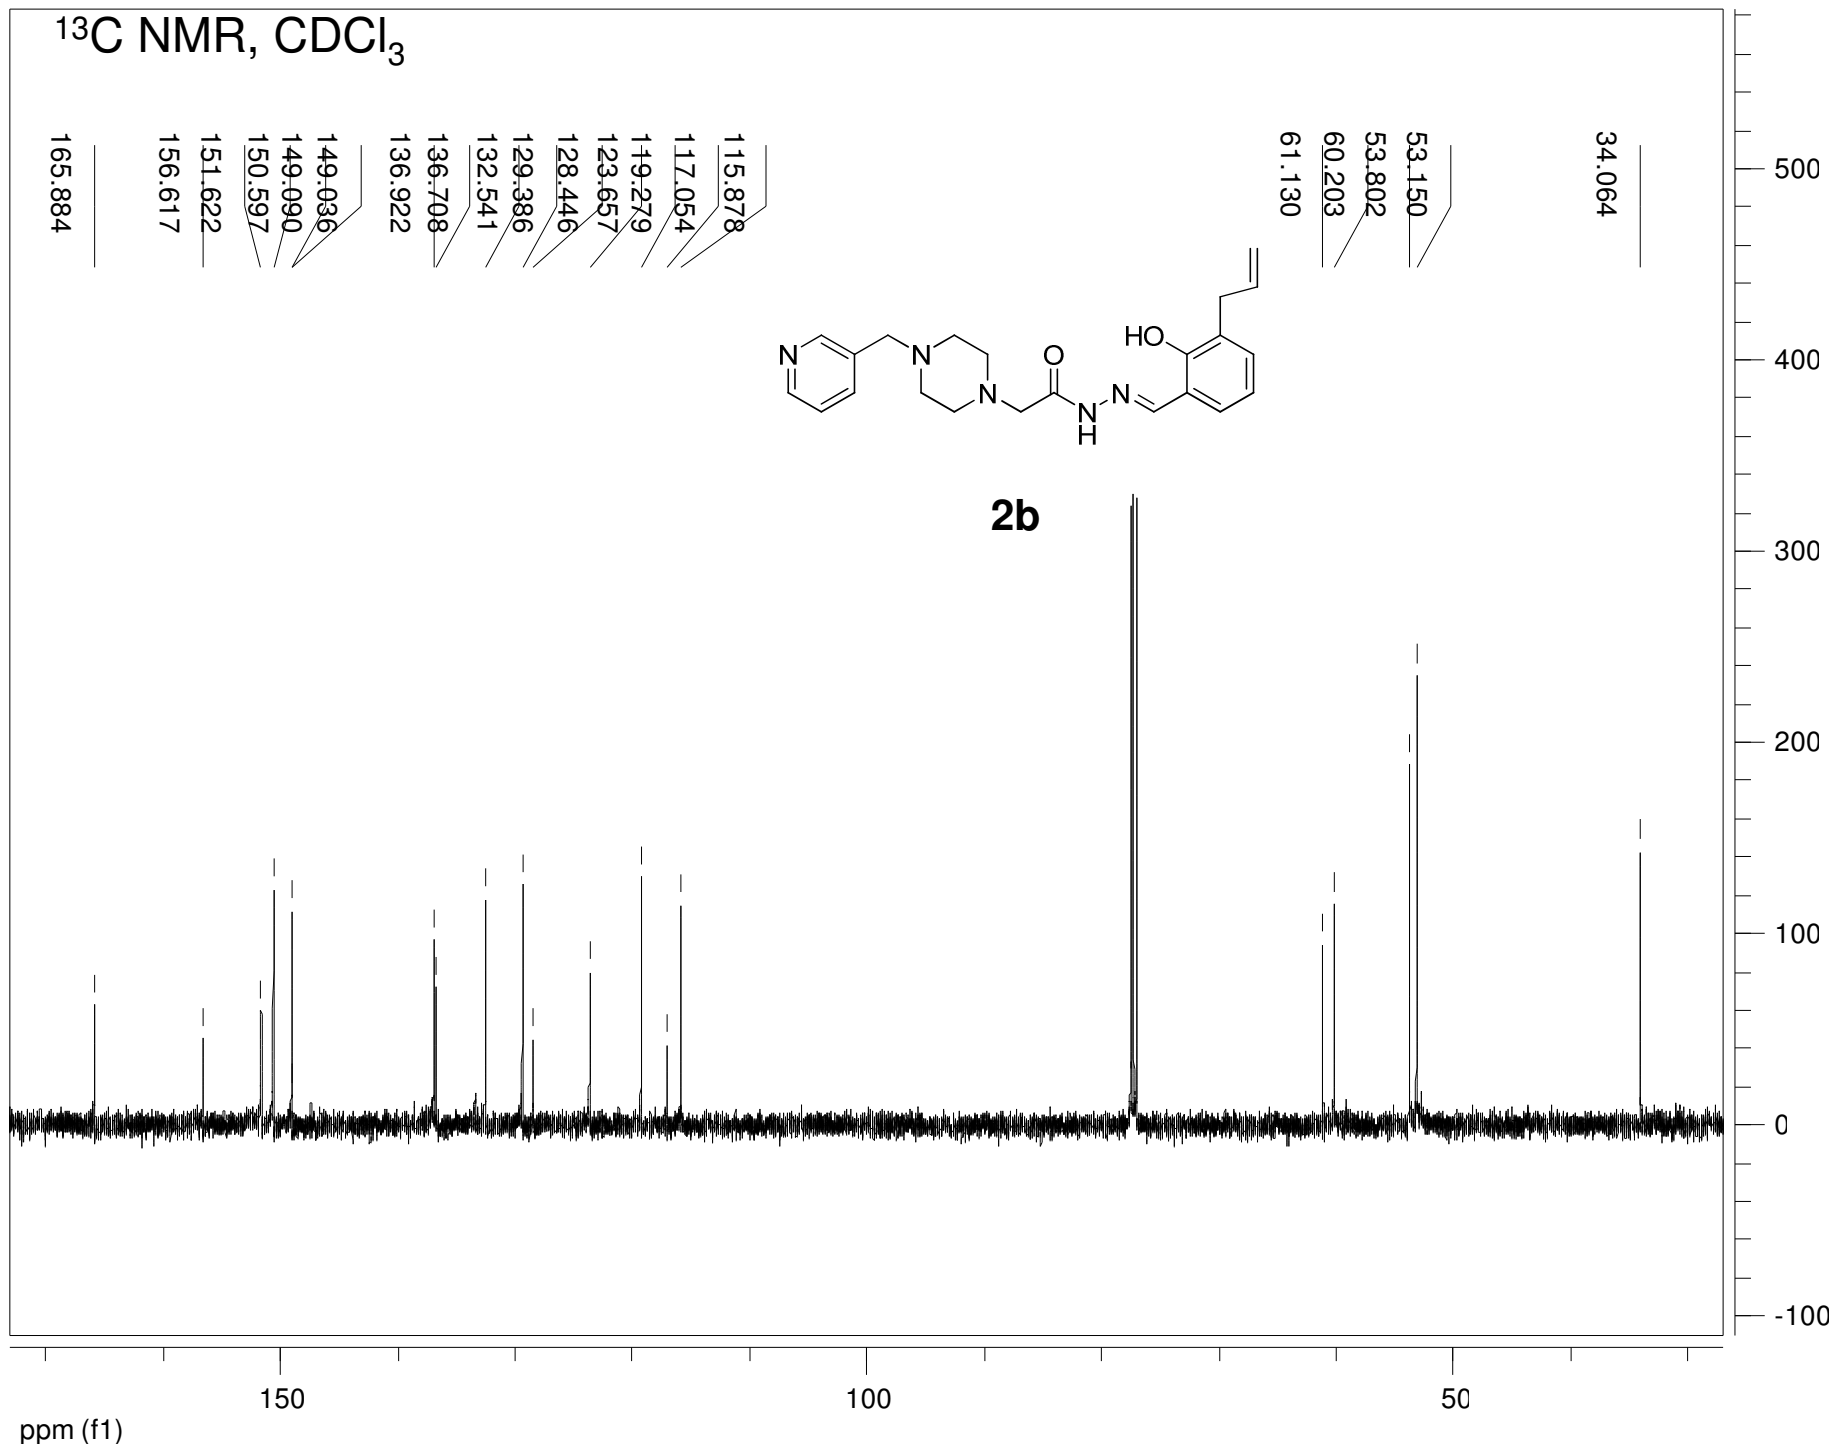



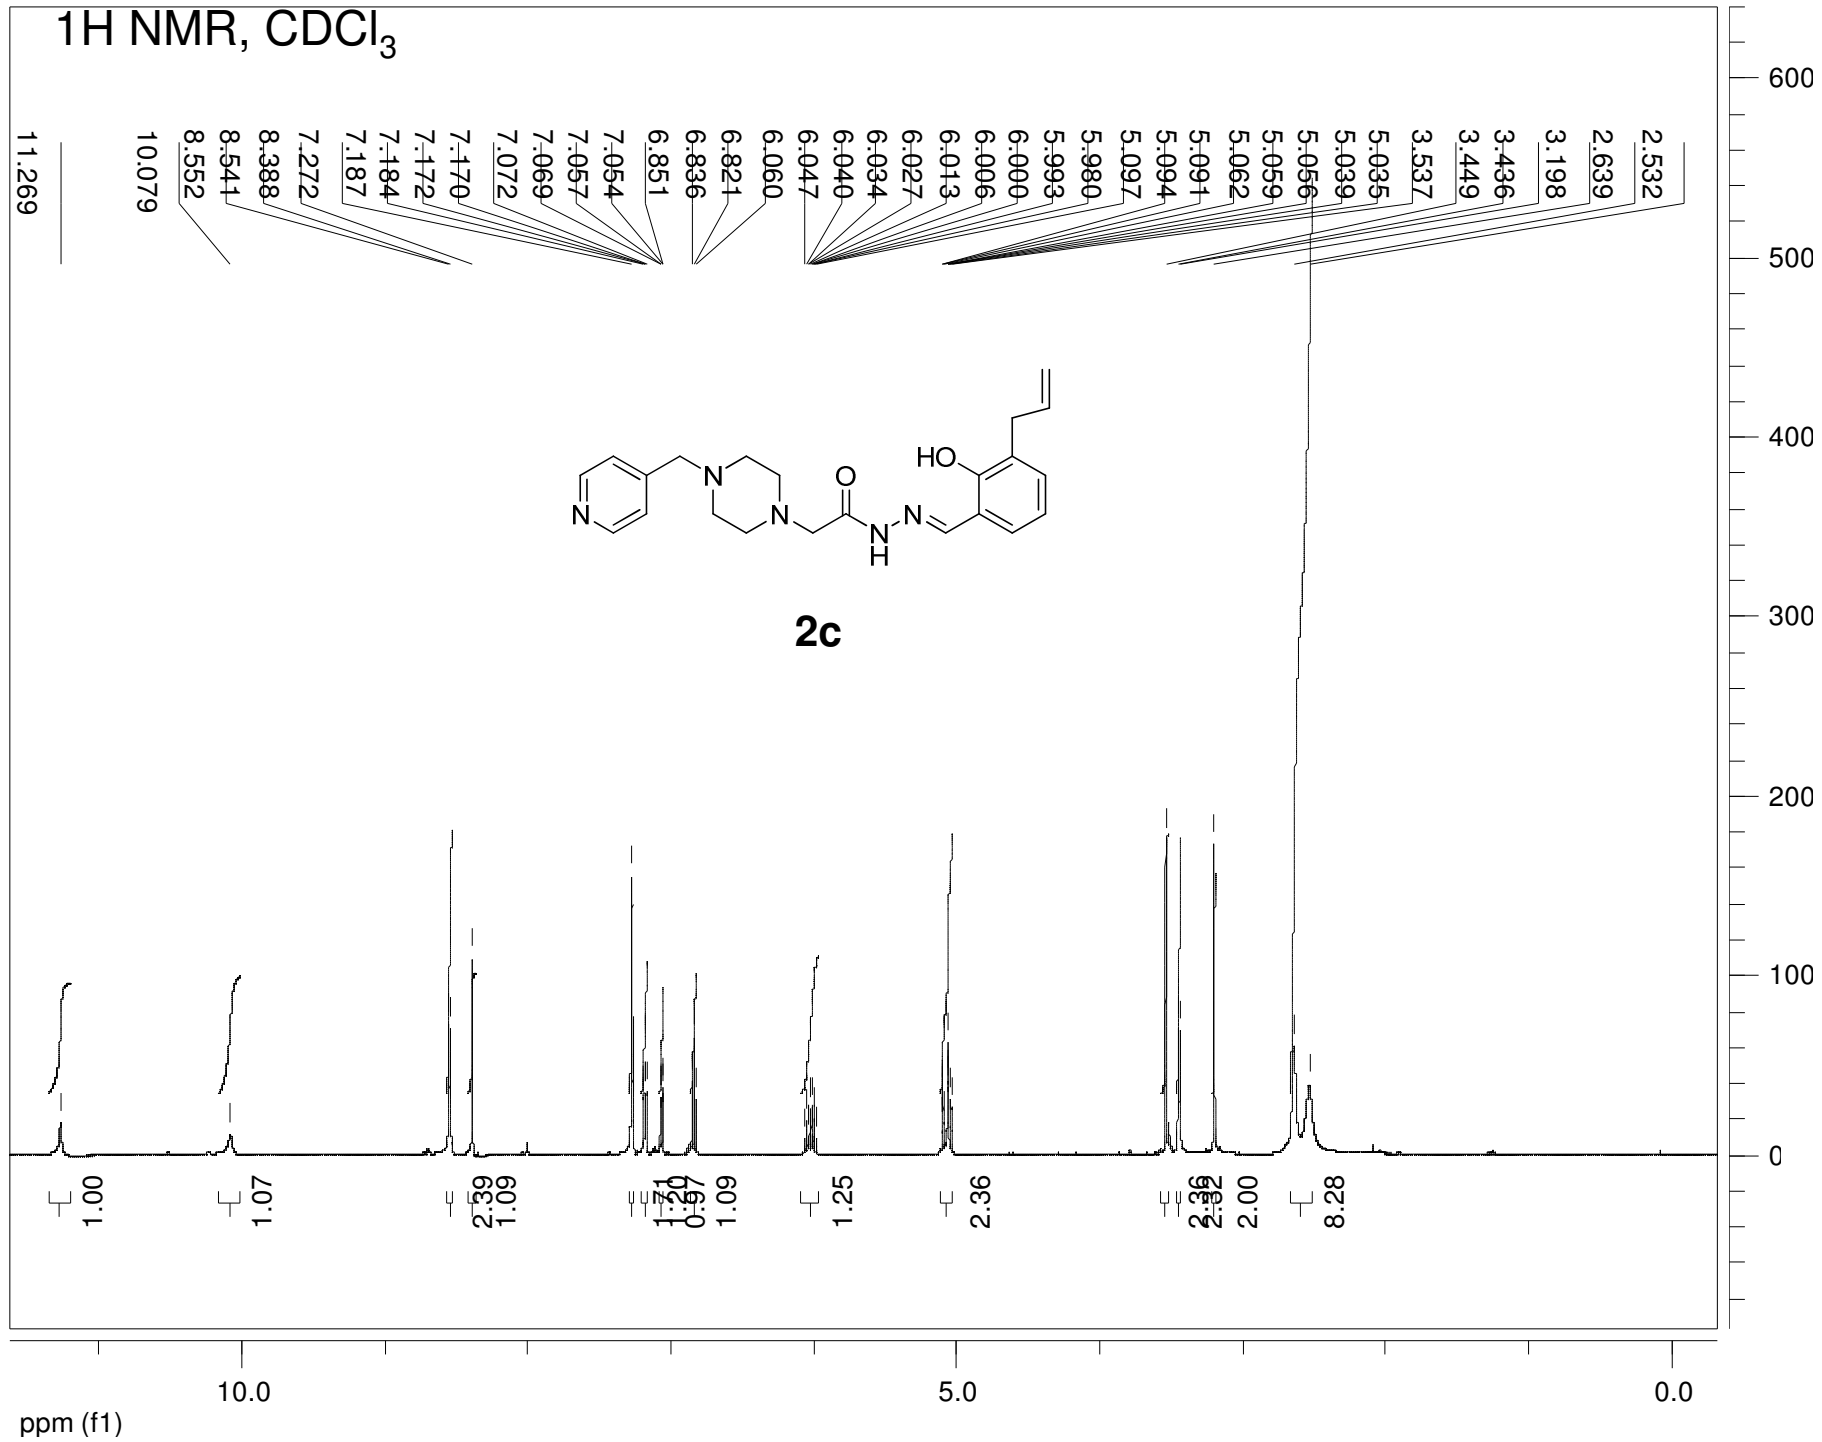

<sup>13</sup>C NMR, CDCl<sub>3</sub>

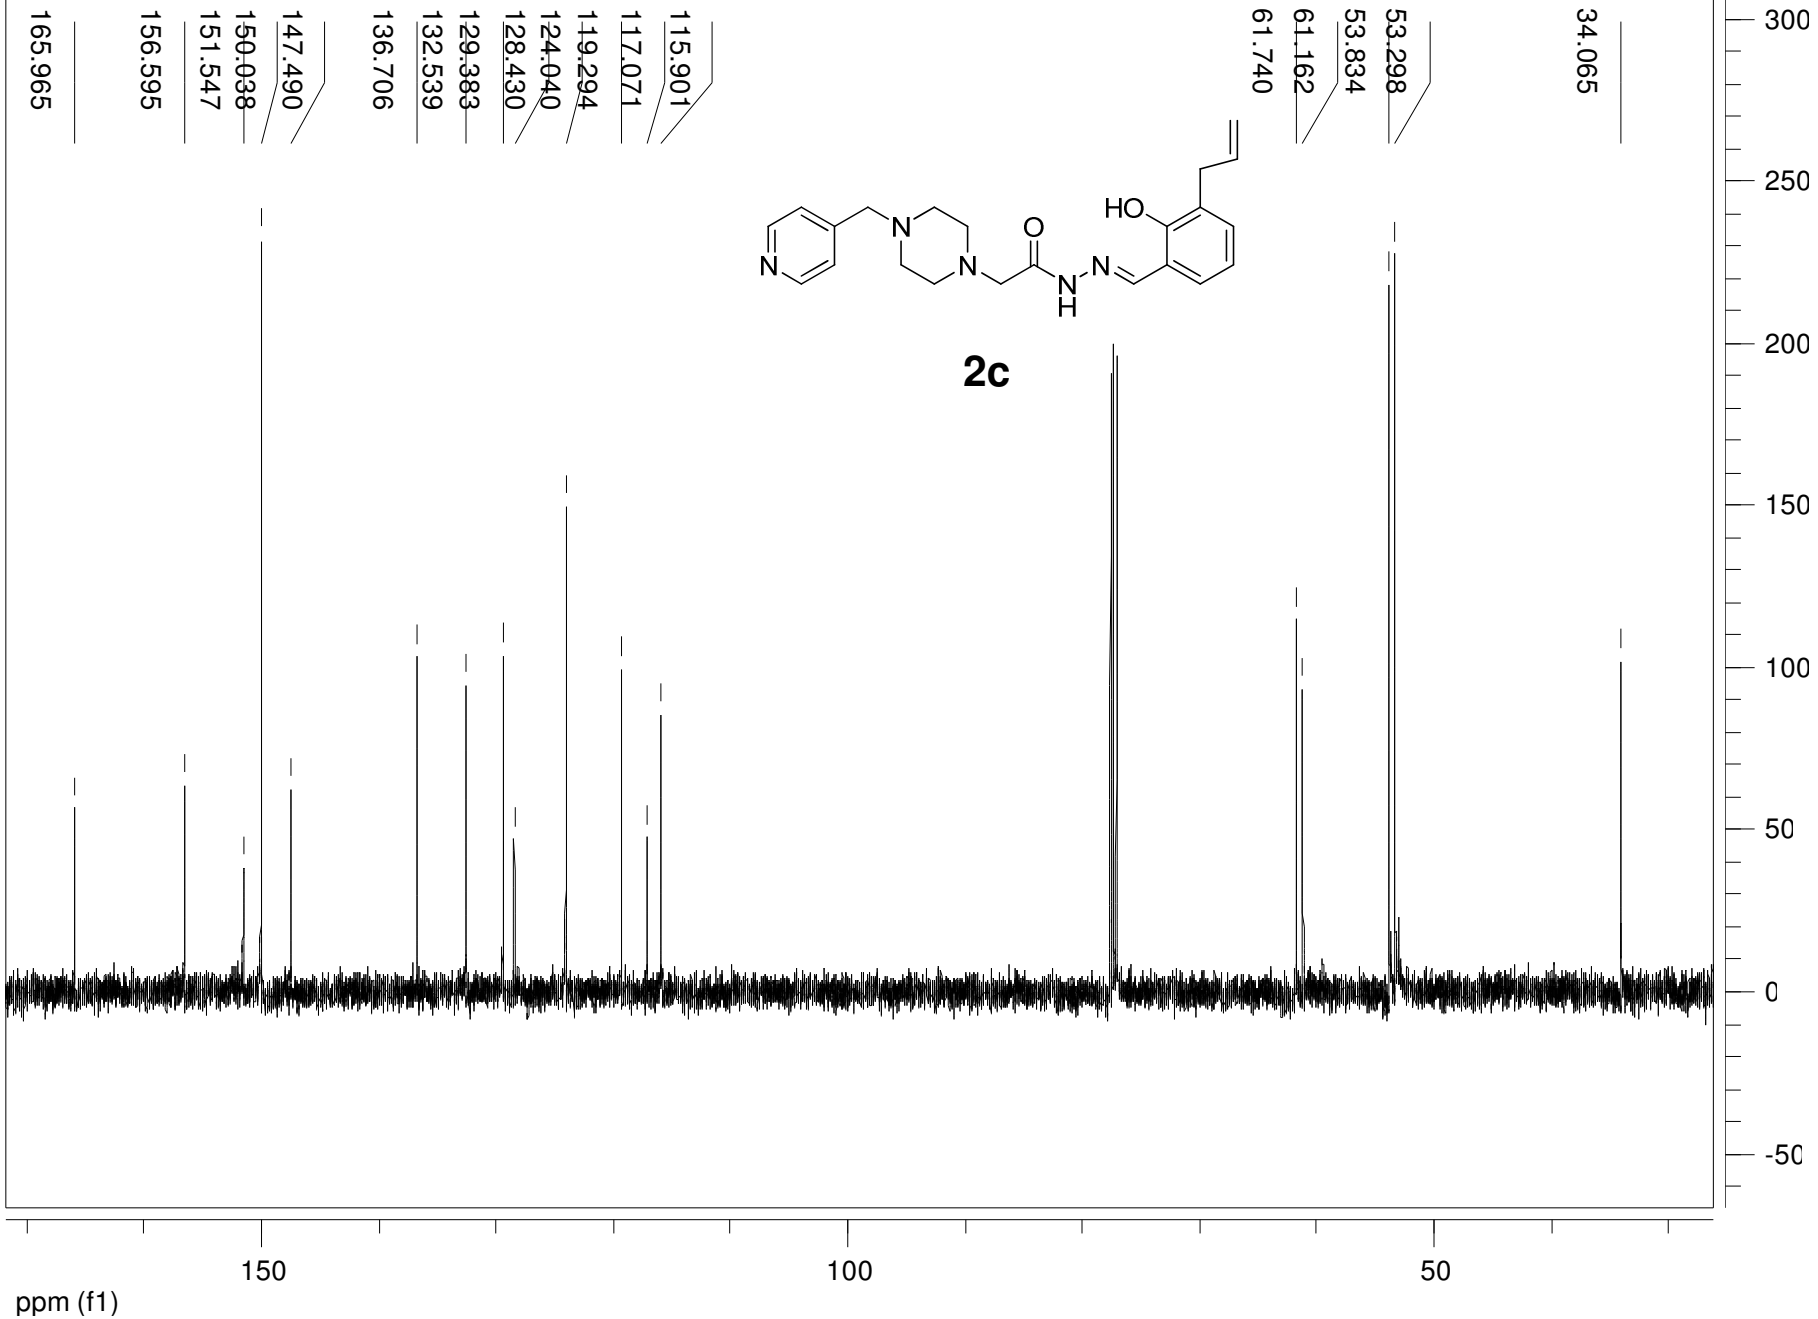

# HPLC

\* RUN # 428      JAN 7, 2008 21:26:17  
START

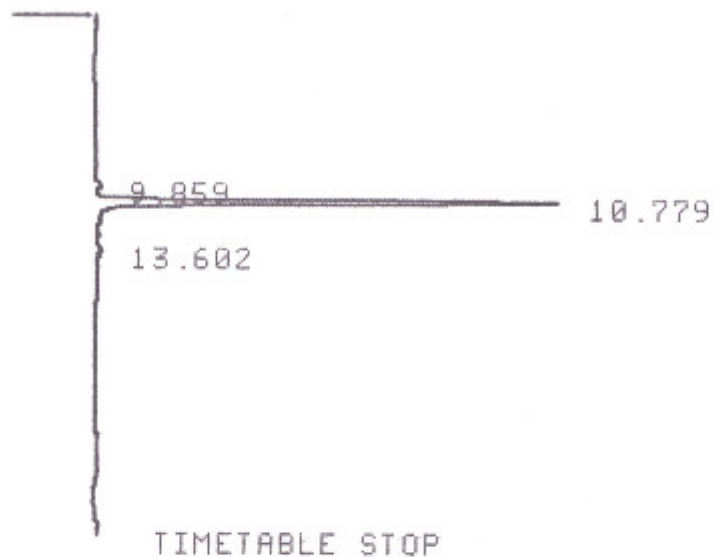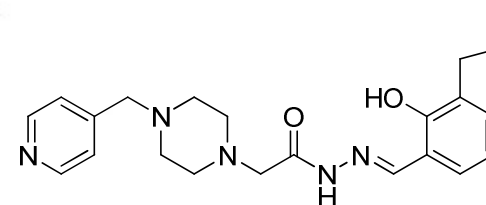

**2c**

RUN# 428      JAN 7, 2008 21:26:17

AREA%

| RT     | AREA     | TYPE | WIDTH | AREA%    |
|--------|----------|------|-------|----------|
| 9.859  | 192383   | BP   | .312  | 1.62955  |
| 10.779 | 11429840 | PB   | .261  | 96.81466 |
| 13.602 | 183675   | BU   | .299  | 1.55579  |

TOTAL AREA=1.1806E+07  
MUL FACTOR=1.0000E+00





<sup>13</sup>C NMR, CDCl<sub>3</sub>

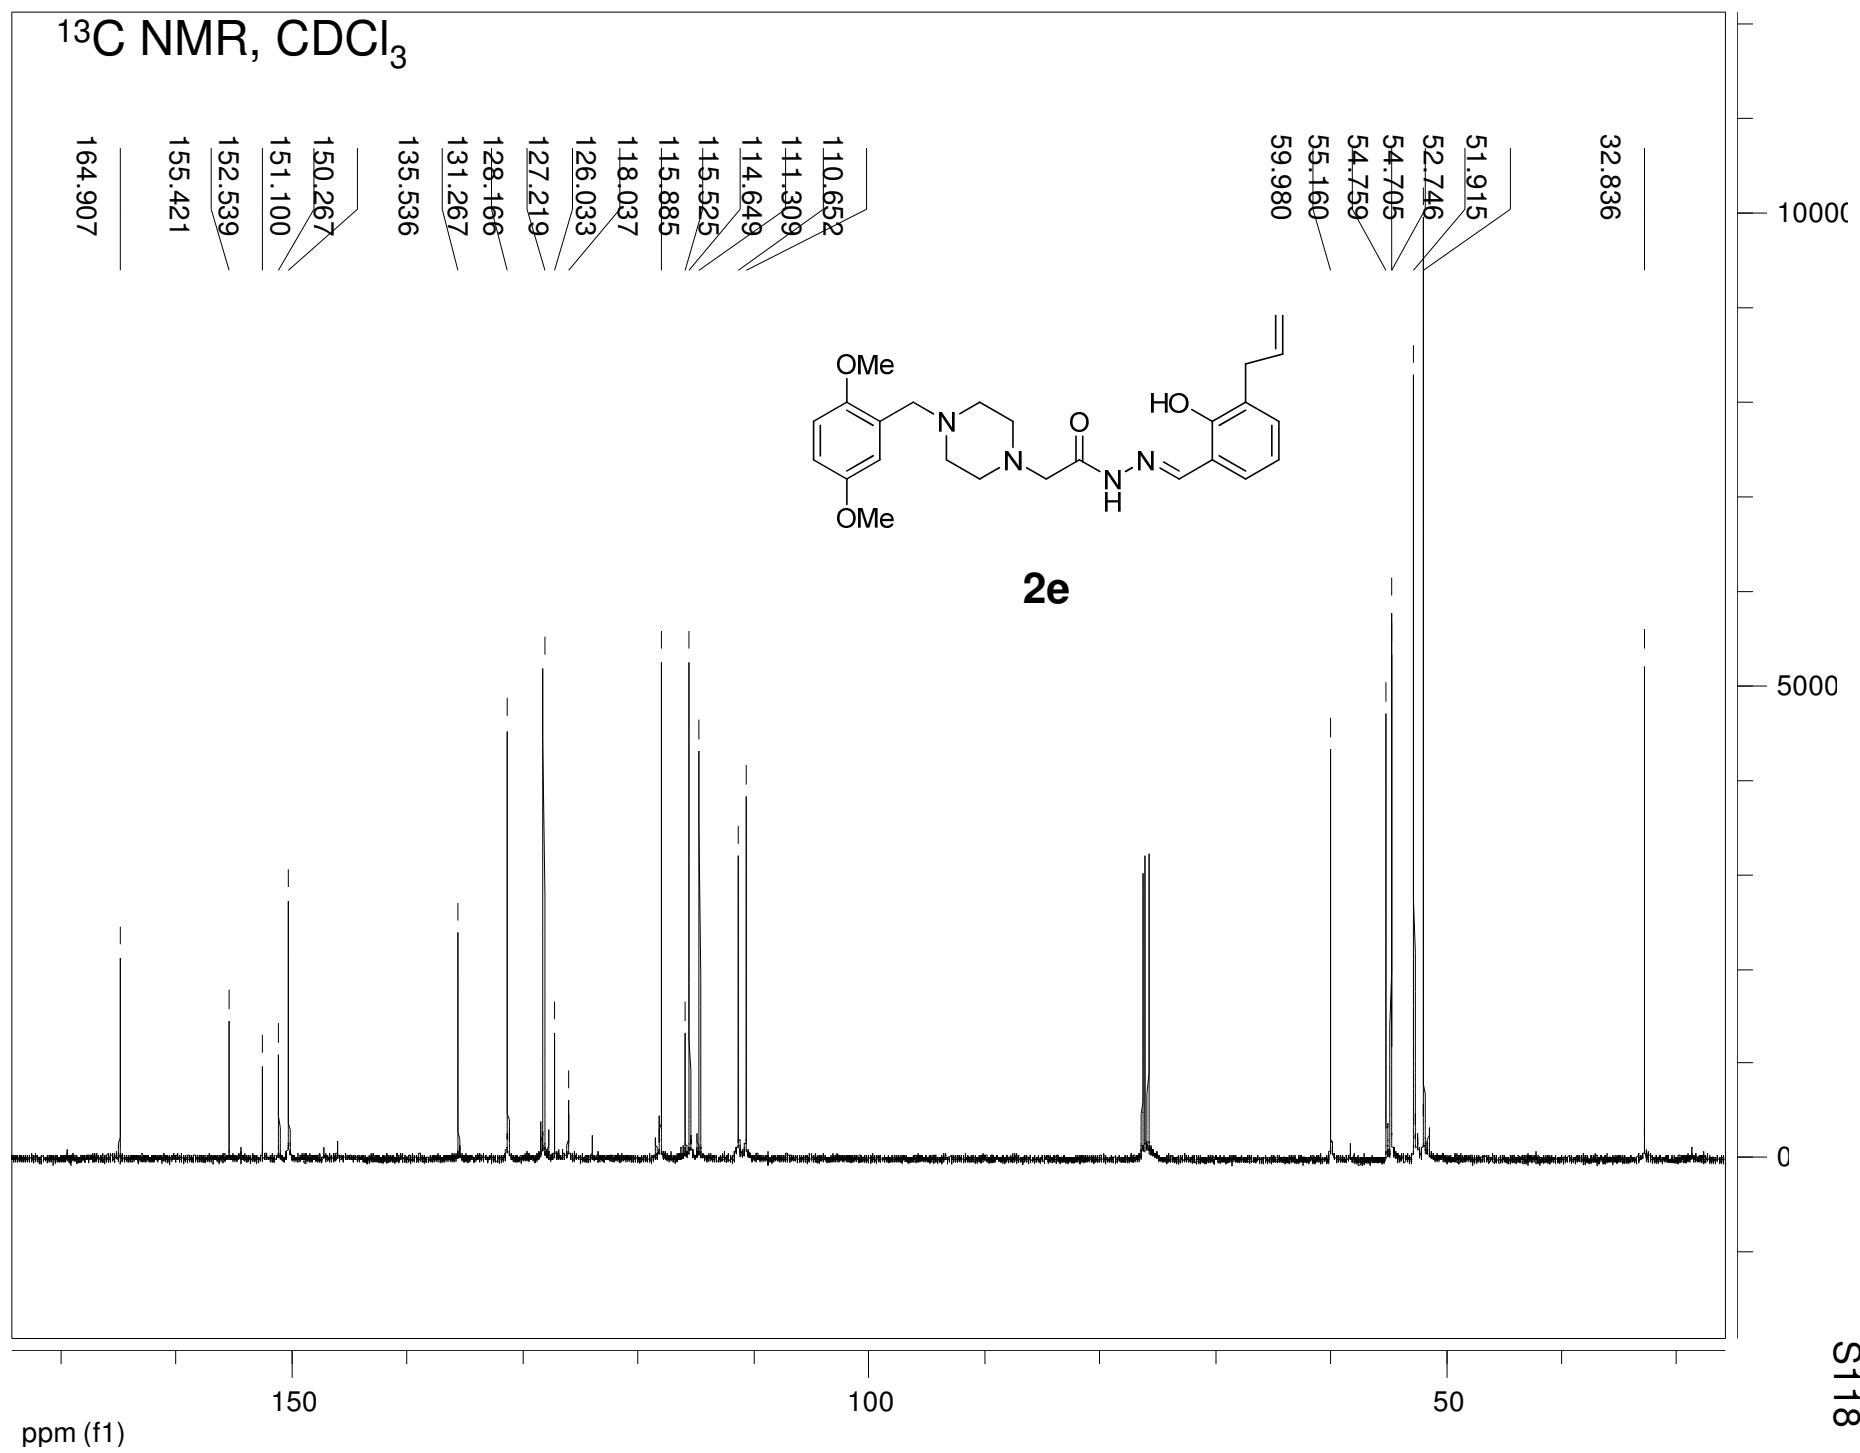

LC-MS

Purity: 95%

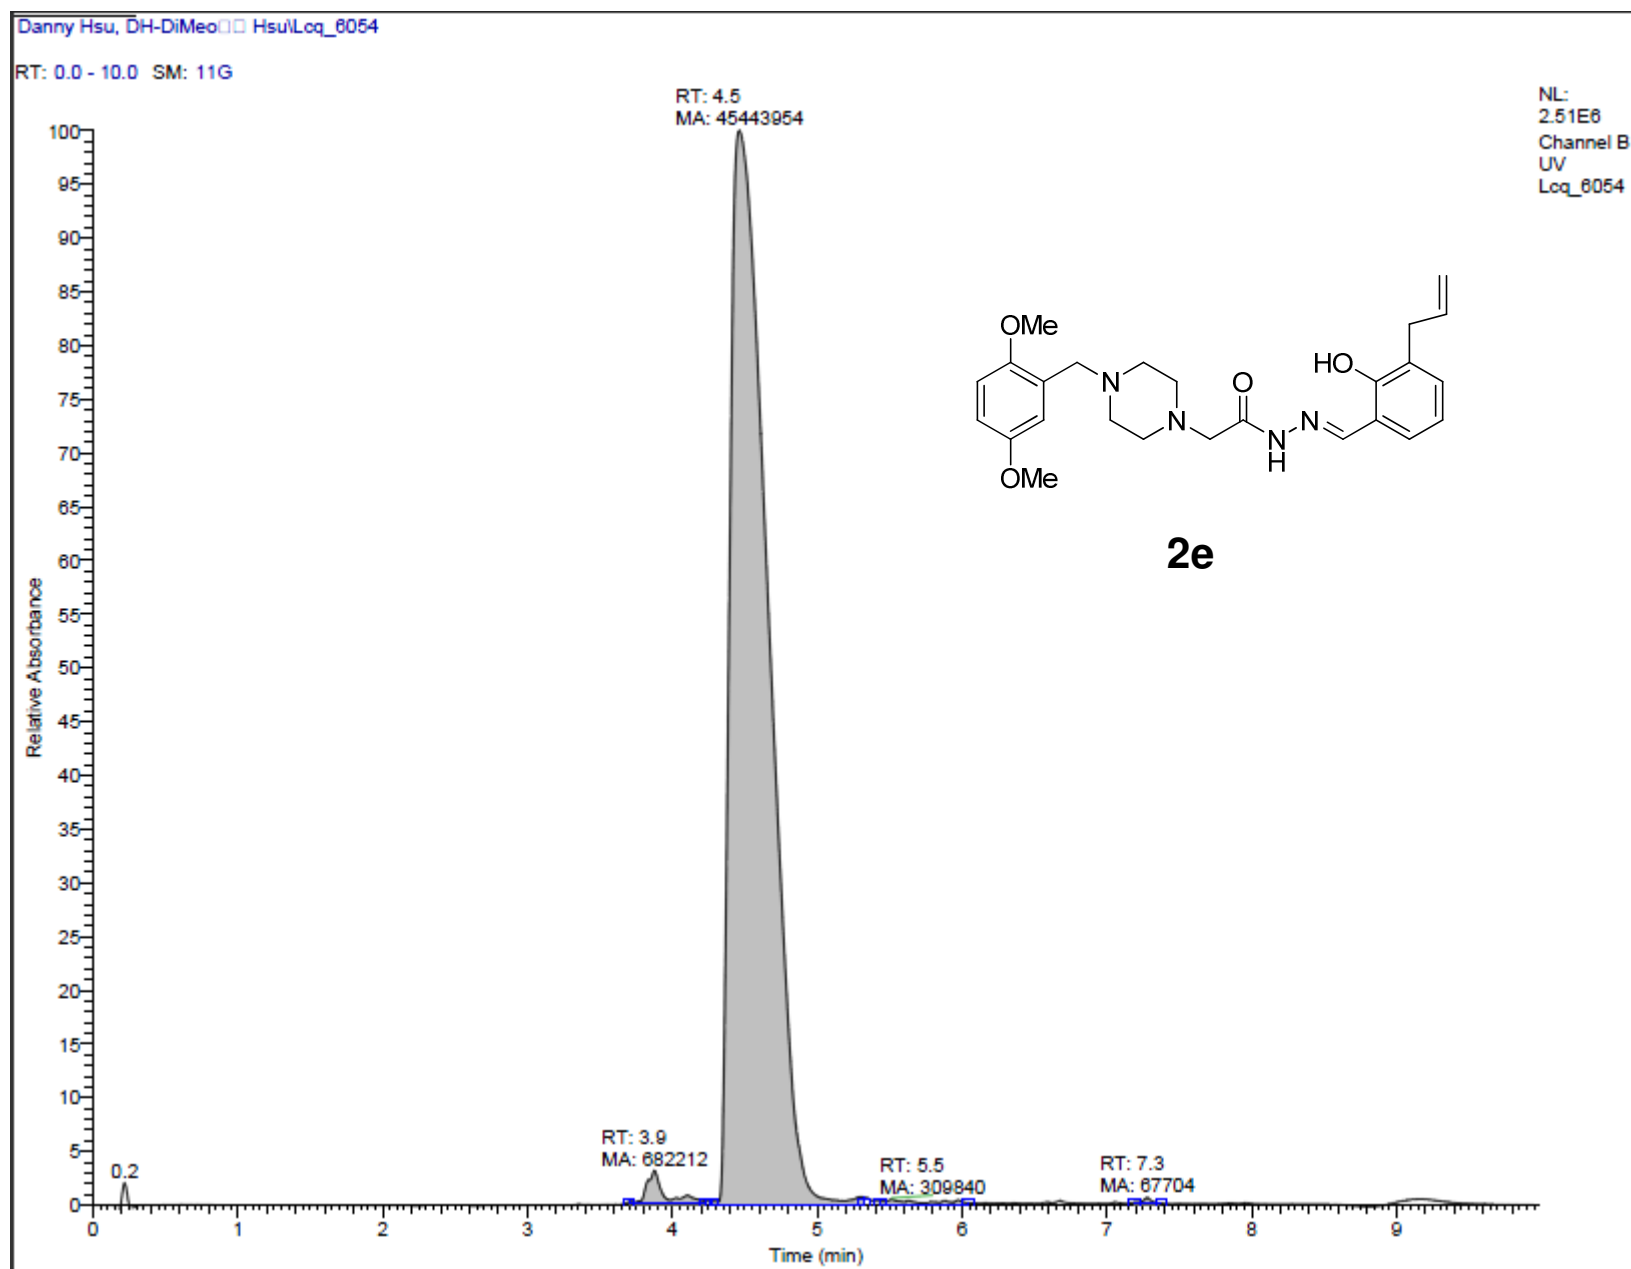

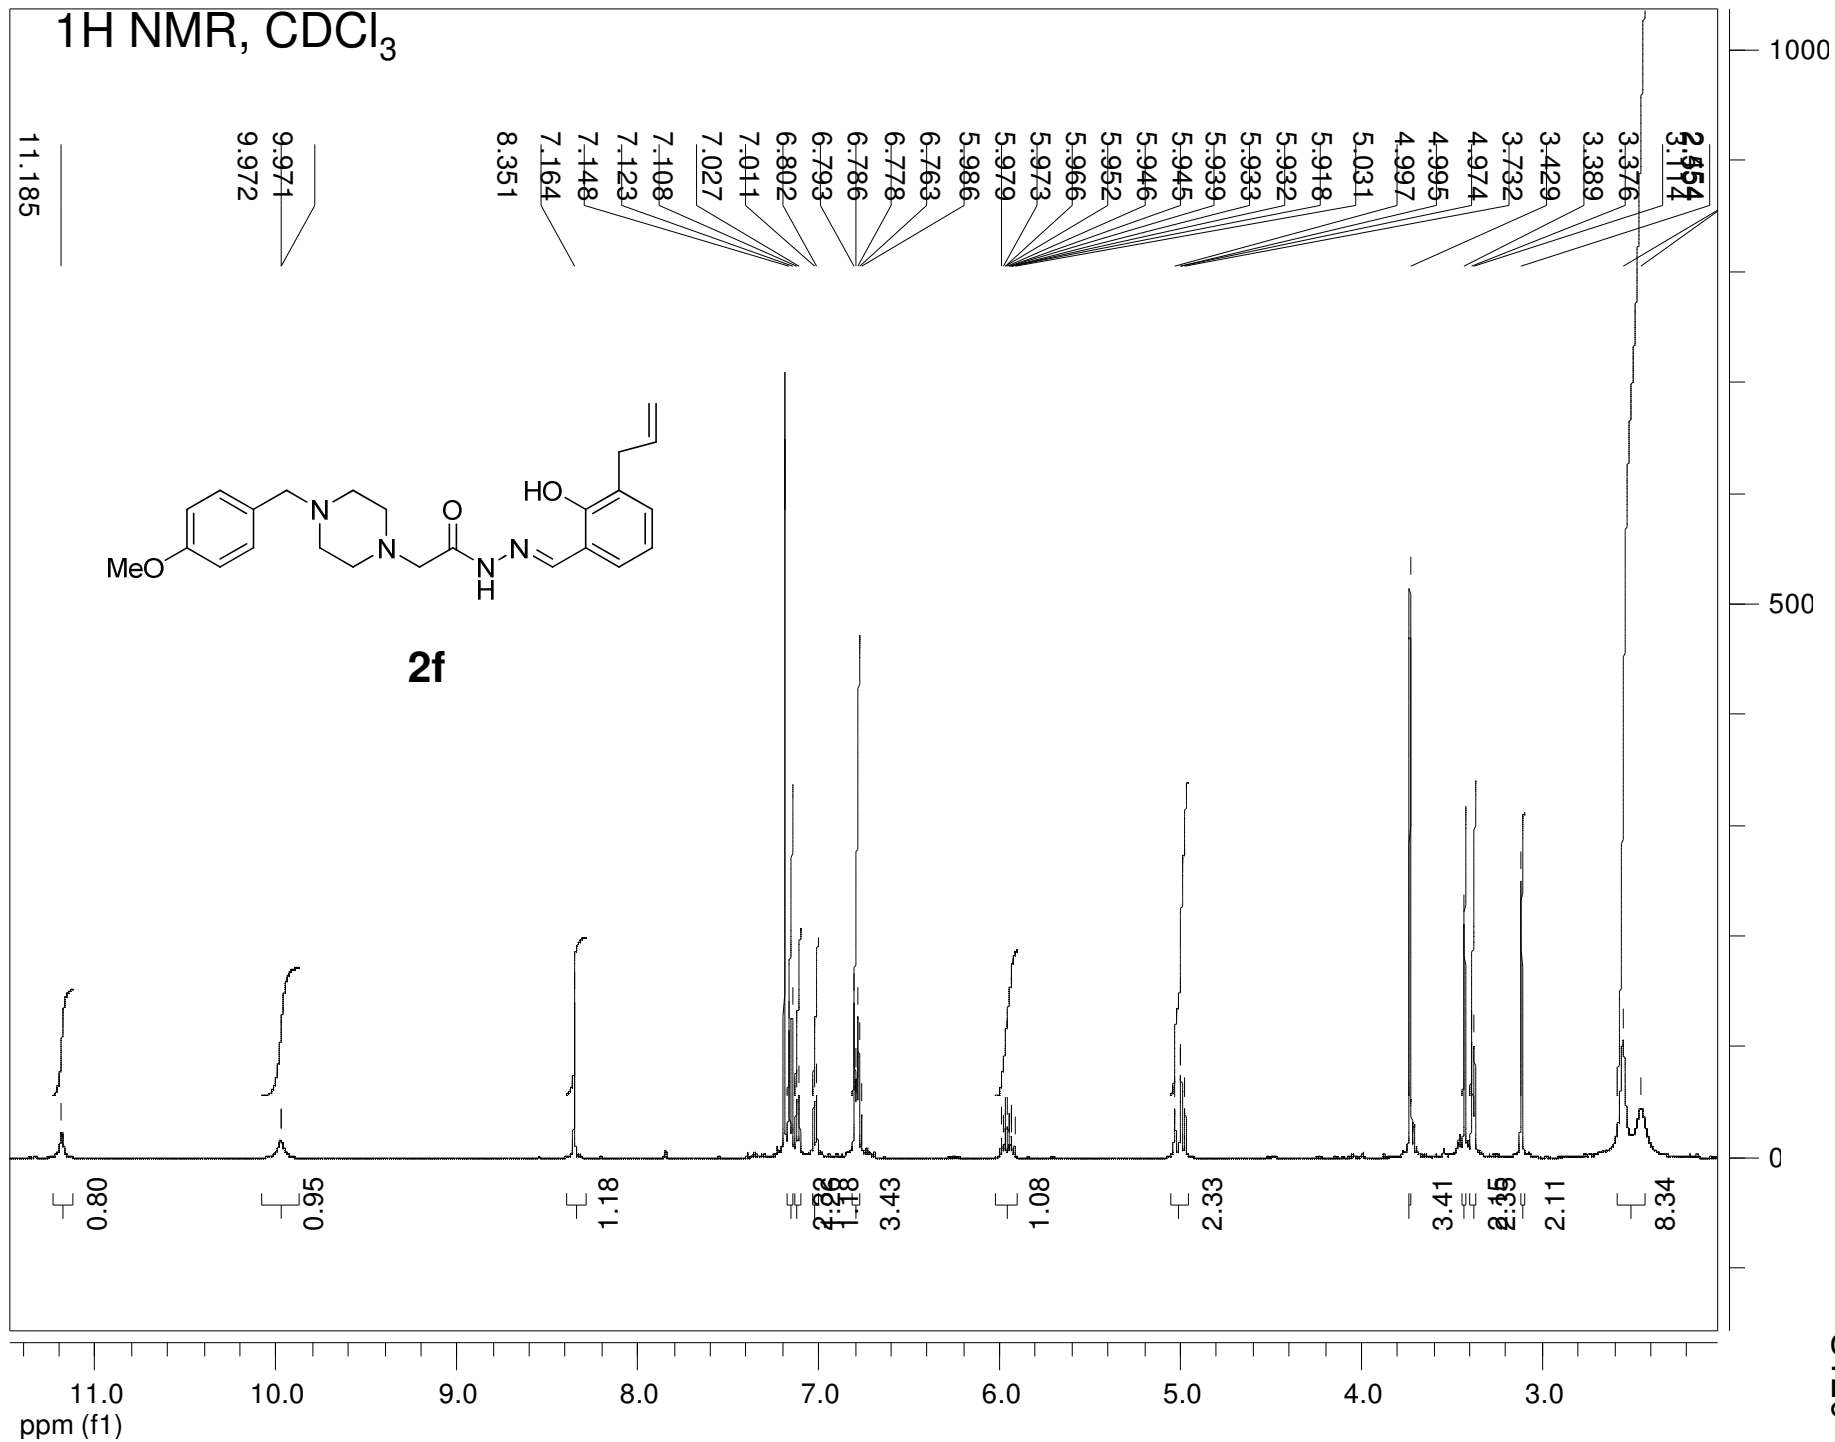

<sup>13</sup>C NMR, CDCl<sub>3</sub>

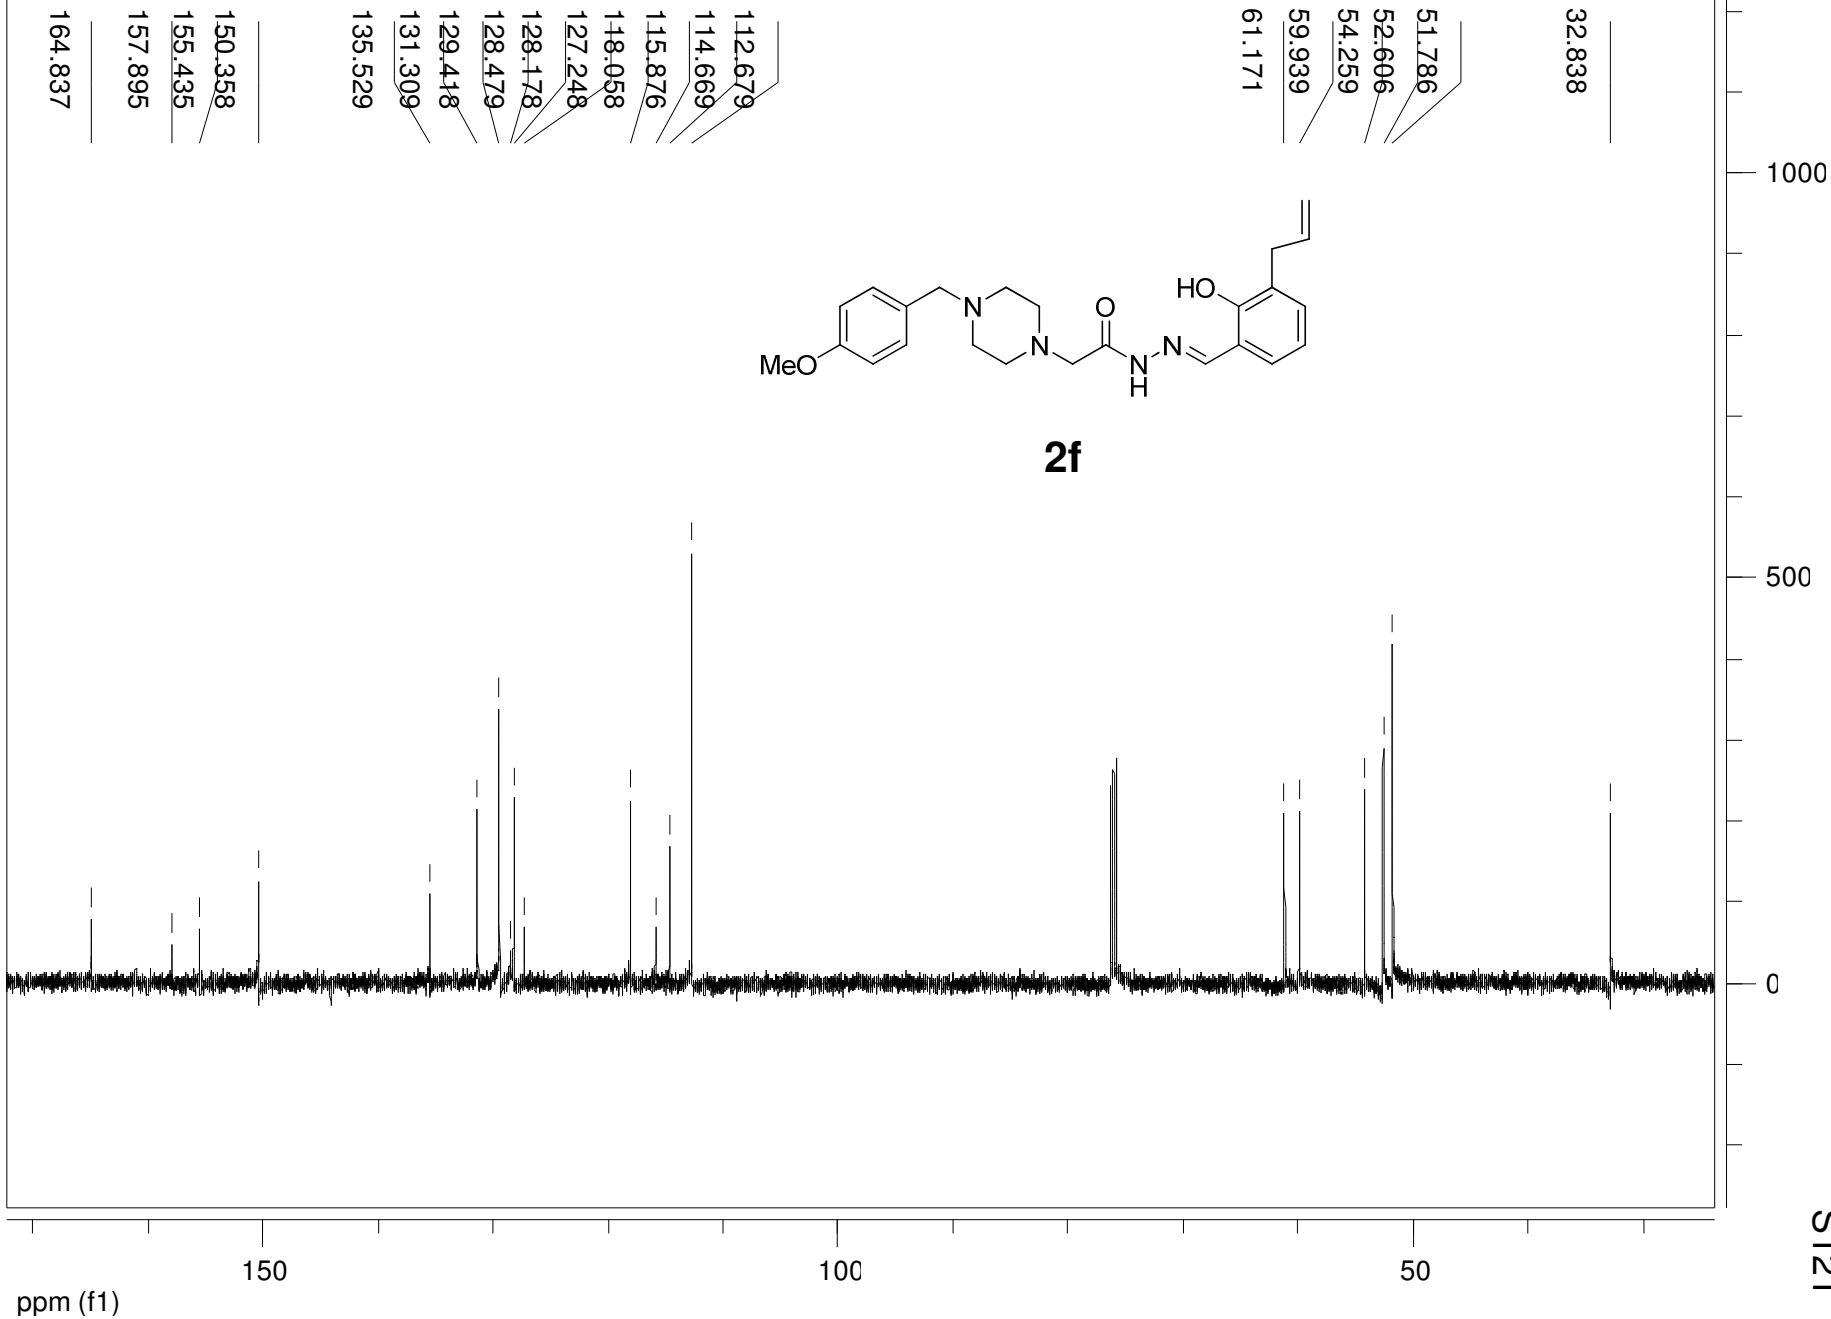

LC-MS

Purity: 99%

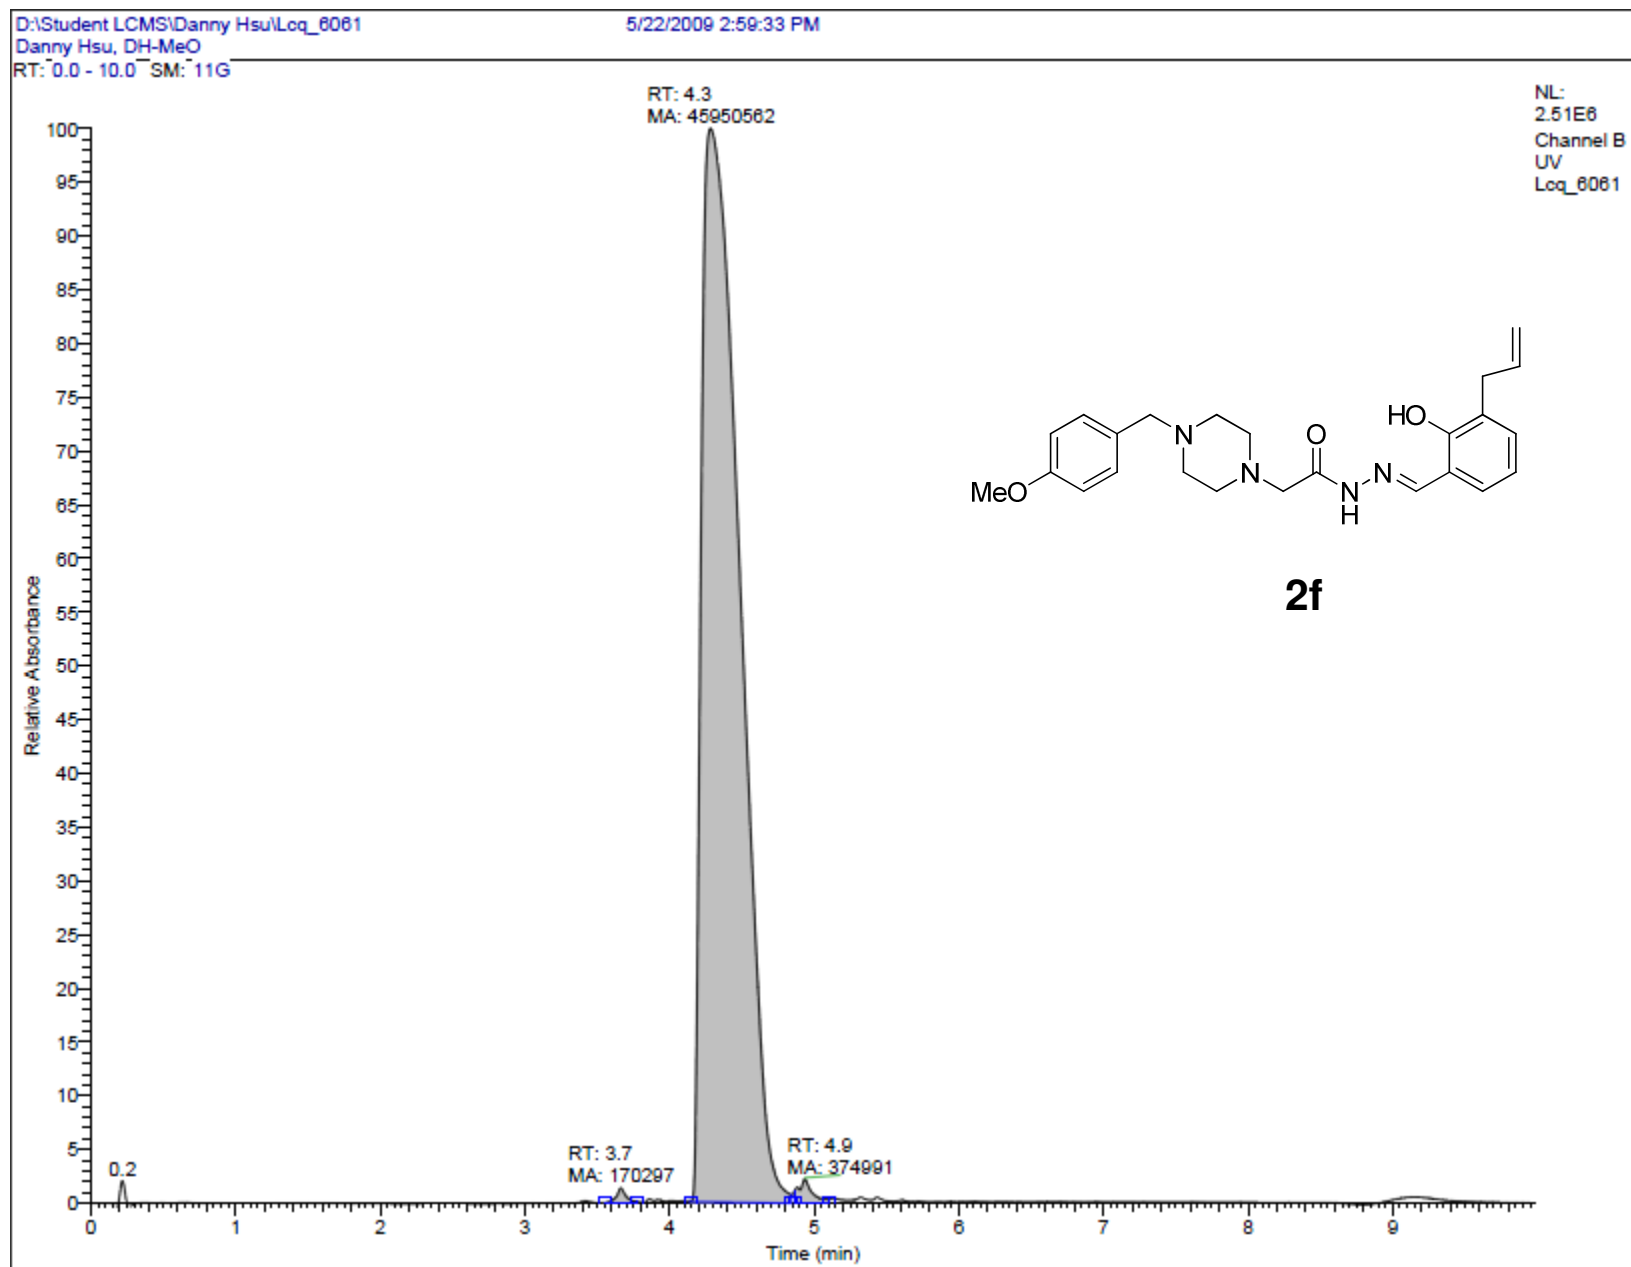

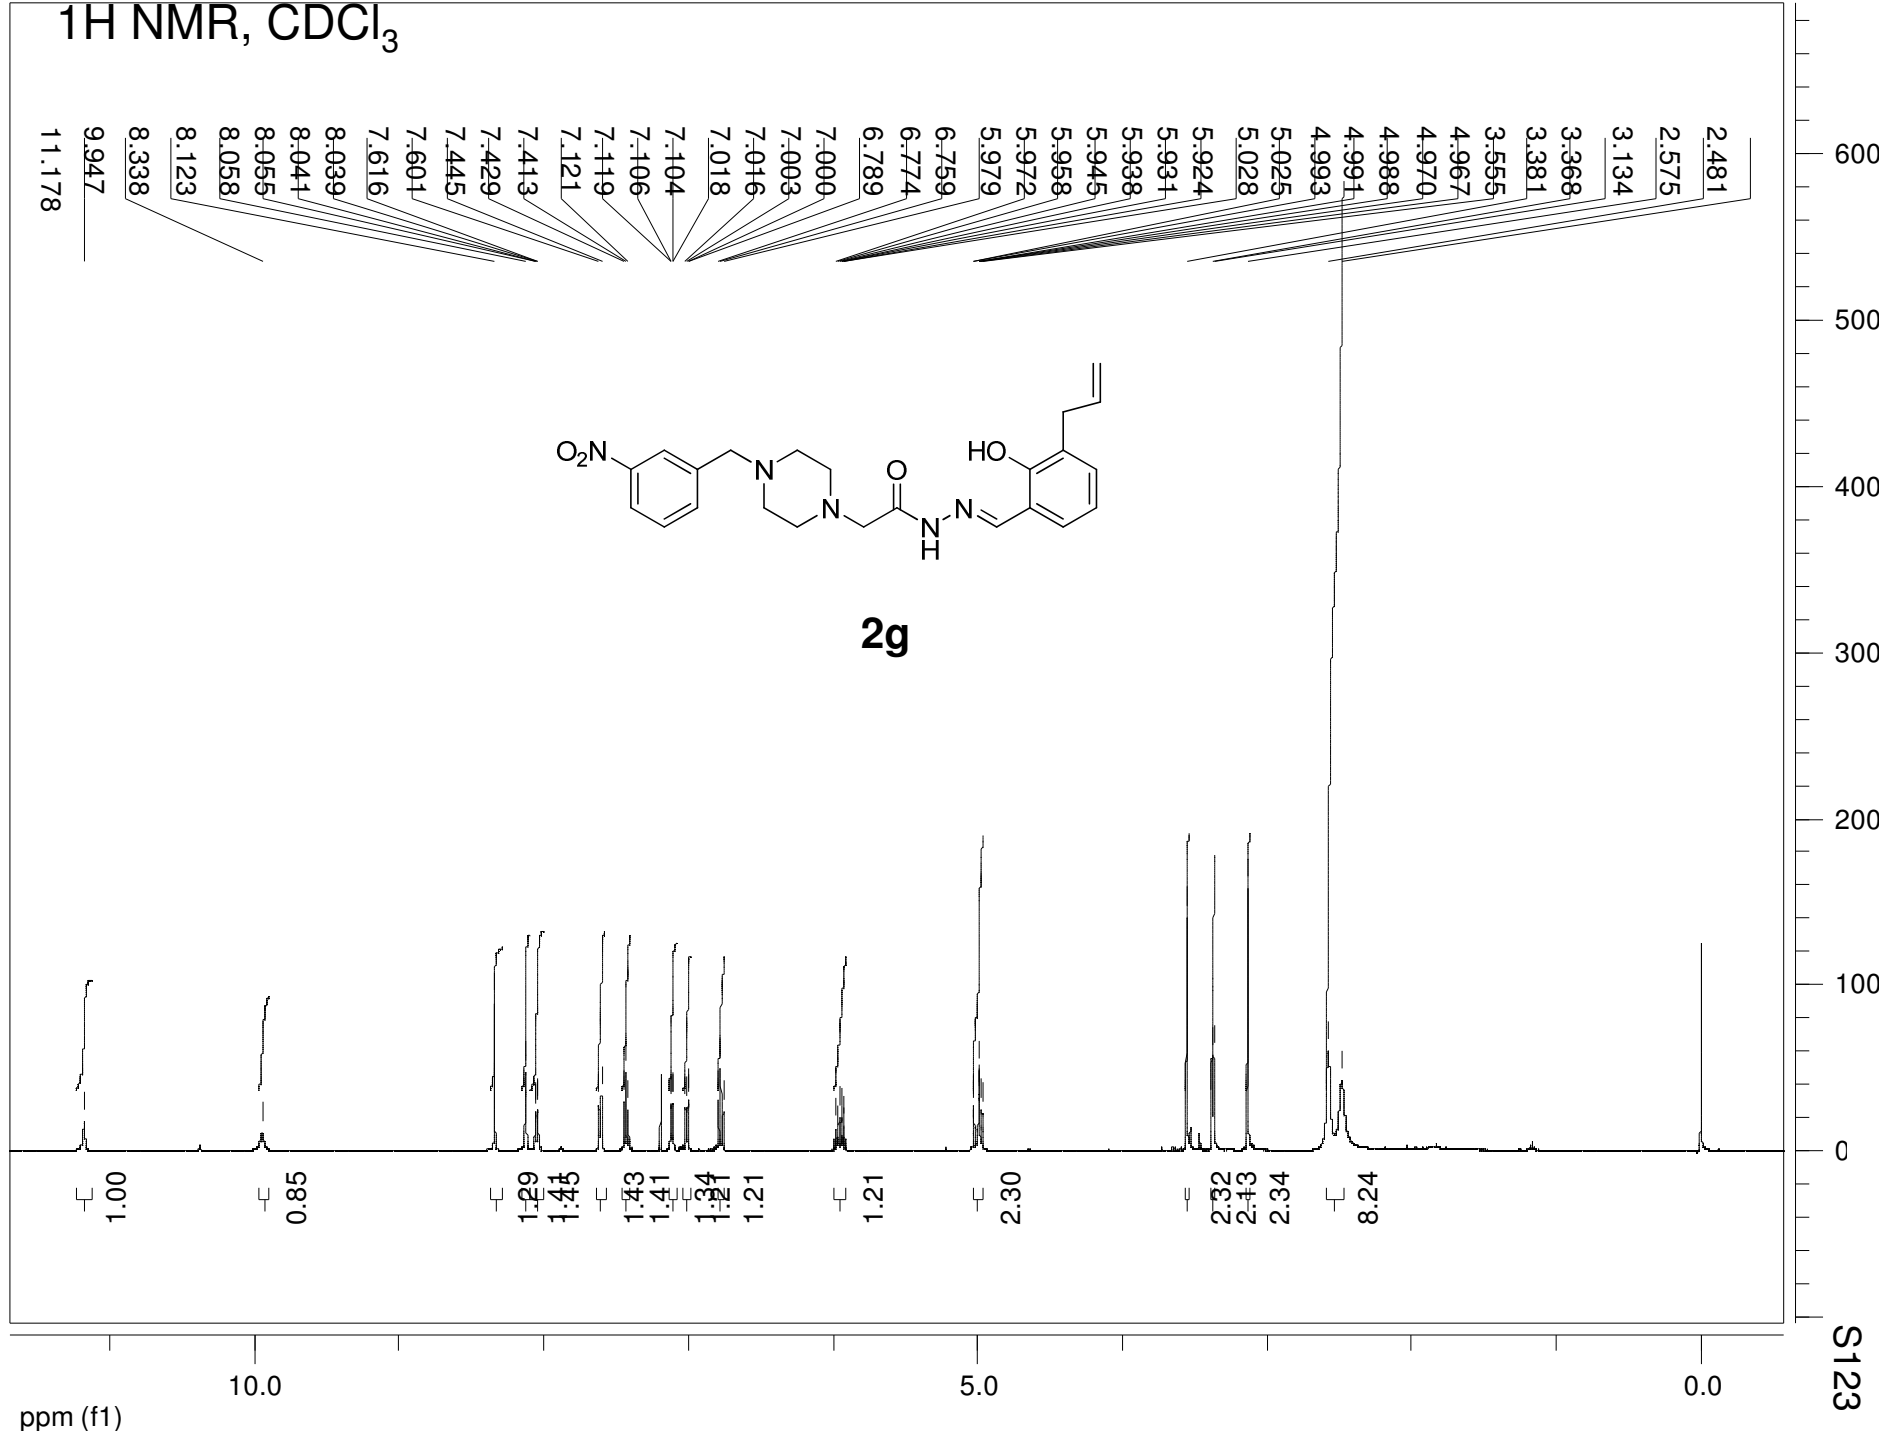

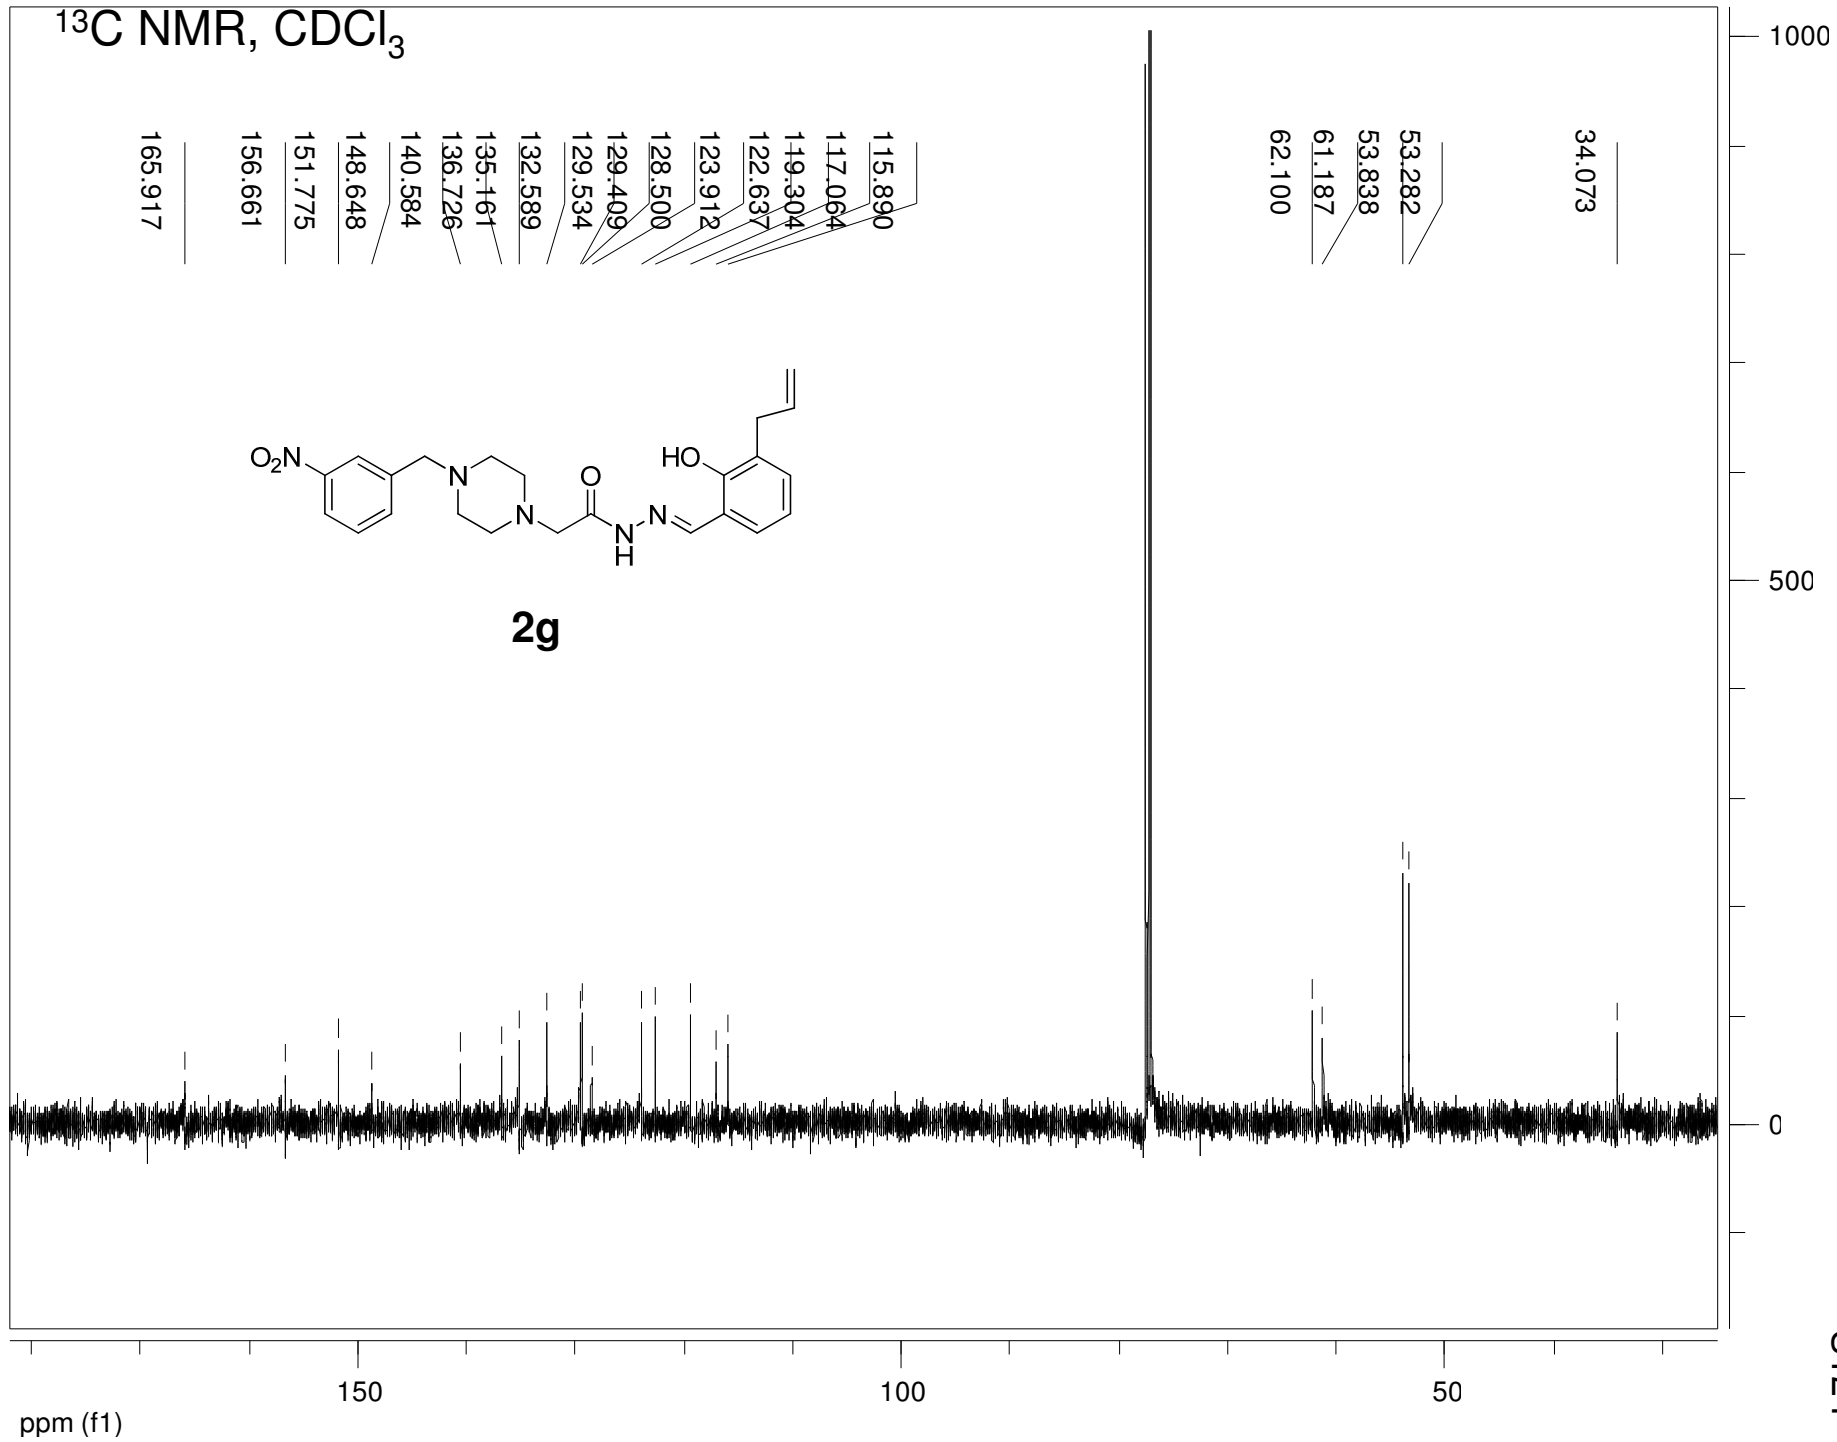



# HPLC

Data File D:\HPCHEM\DATA\2009\DE\DH\_NO2A.D  
 Sample Name: DH-NO2a

```

=====
Acq. Operator   : DH
Acq. Instrument : El Chupacabra
Injection Date  : 5/25/2009 12:57:01 AM
Location       : P1-F-08
Inj Volume     : 10 µl

Acq. Method    : C:\HPCHEM\1\METHODS\DH.M
Last changed   : 5/24/2009 11:34:17 PM by DE
                (modified after loading)
Analysis Method: C:\HPCHEM\1\METHODS\DH.M
Last changed   : 5/24/2009 7:59:02 PM by TMA
  
```

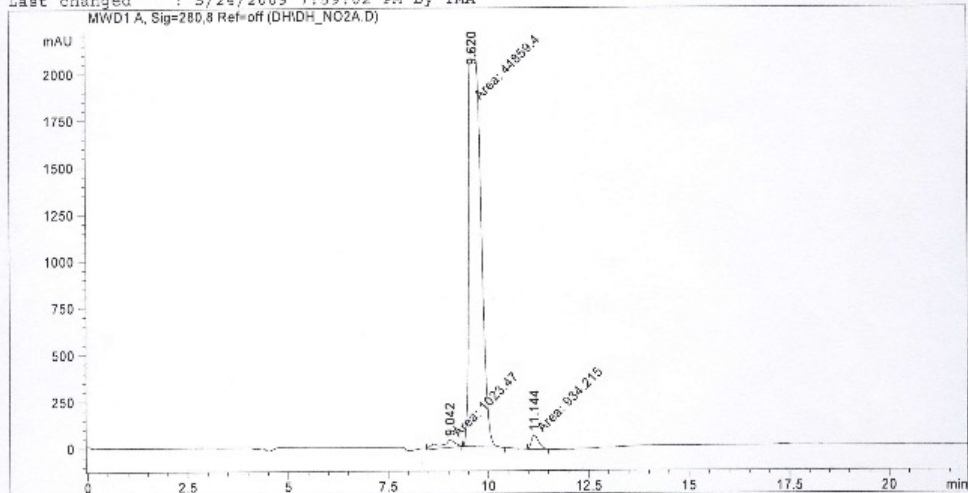

```

=====
Fraction Information
=====
Fraction collection off
=====
No Fractions found.
=====
  
```

```

=====
Area Percent Report
=====
  
```

```

Sorted By      : Signal
Multiplier     : 1.0000
Dilution       : 1.0000
Use Multiplier & Dilution Factor with ISTDs
  
```

Signal 1: MWD1 A, Sig=280,8 Ref=off

| Peak # | RetTime [min] | Type | Width [min] | Area [mAU*s] | Height [mAU] | Area %  |
|--------|---------------|------|-------------|--------------|--------------|---------|
| 1      | 9.042         | MM   | 0.4191      | 1023.46661   | 40.69639     | 2.1861  |
| 2      | 9.620         | MM   | 0.3536      | 44859.4e4    | 2114.29907   | 95.8184 |
| 3      | 11.144        | MM   | 0.2047      | 934.21515    | 76.05640     | 1.9955  |

Totals : 4.68171e4 2231.05187

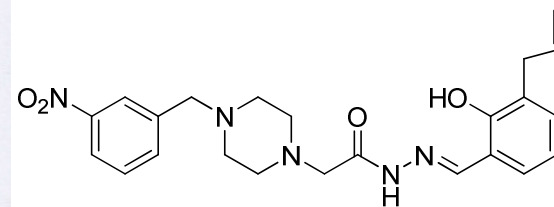

**2g**

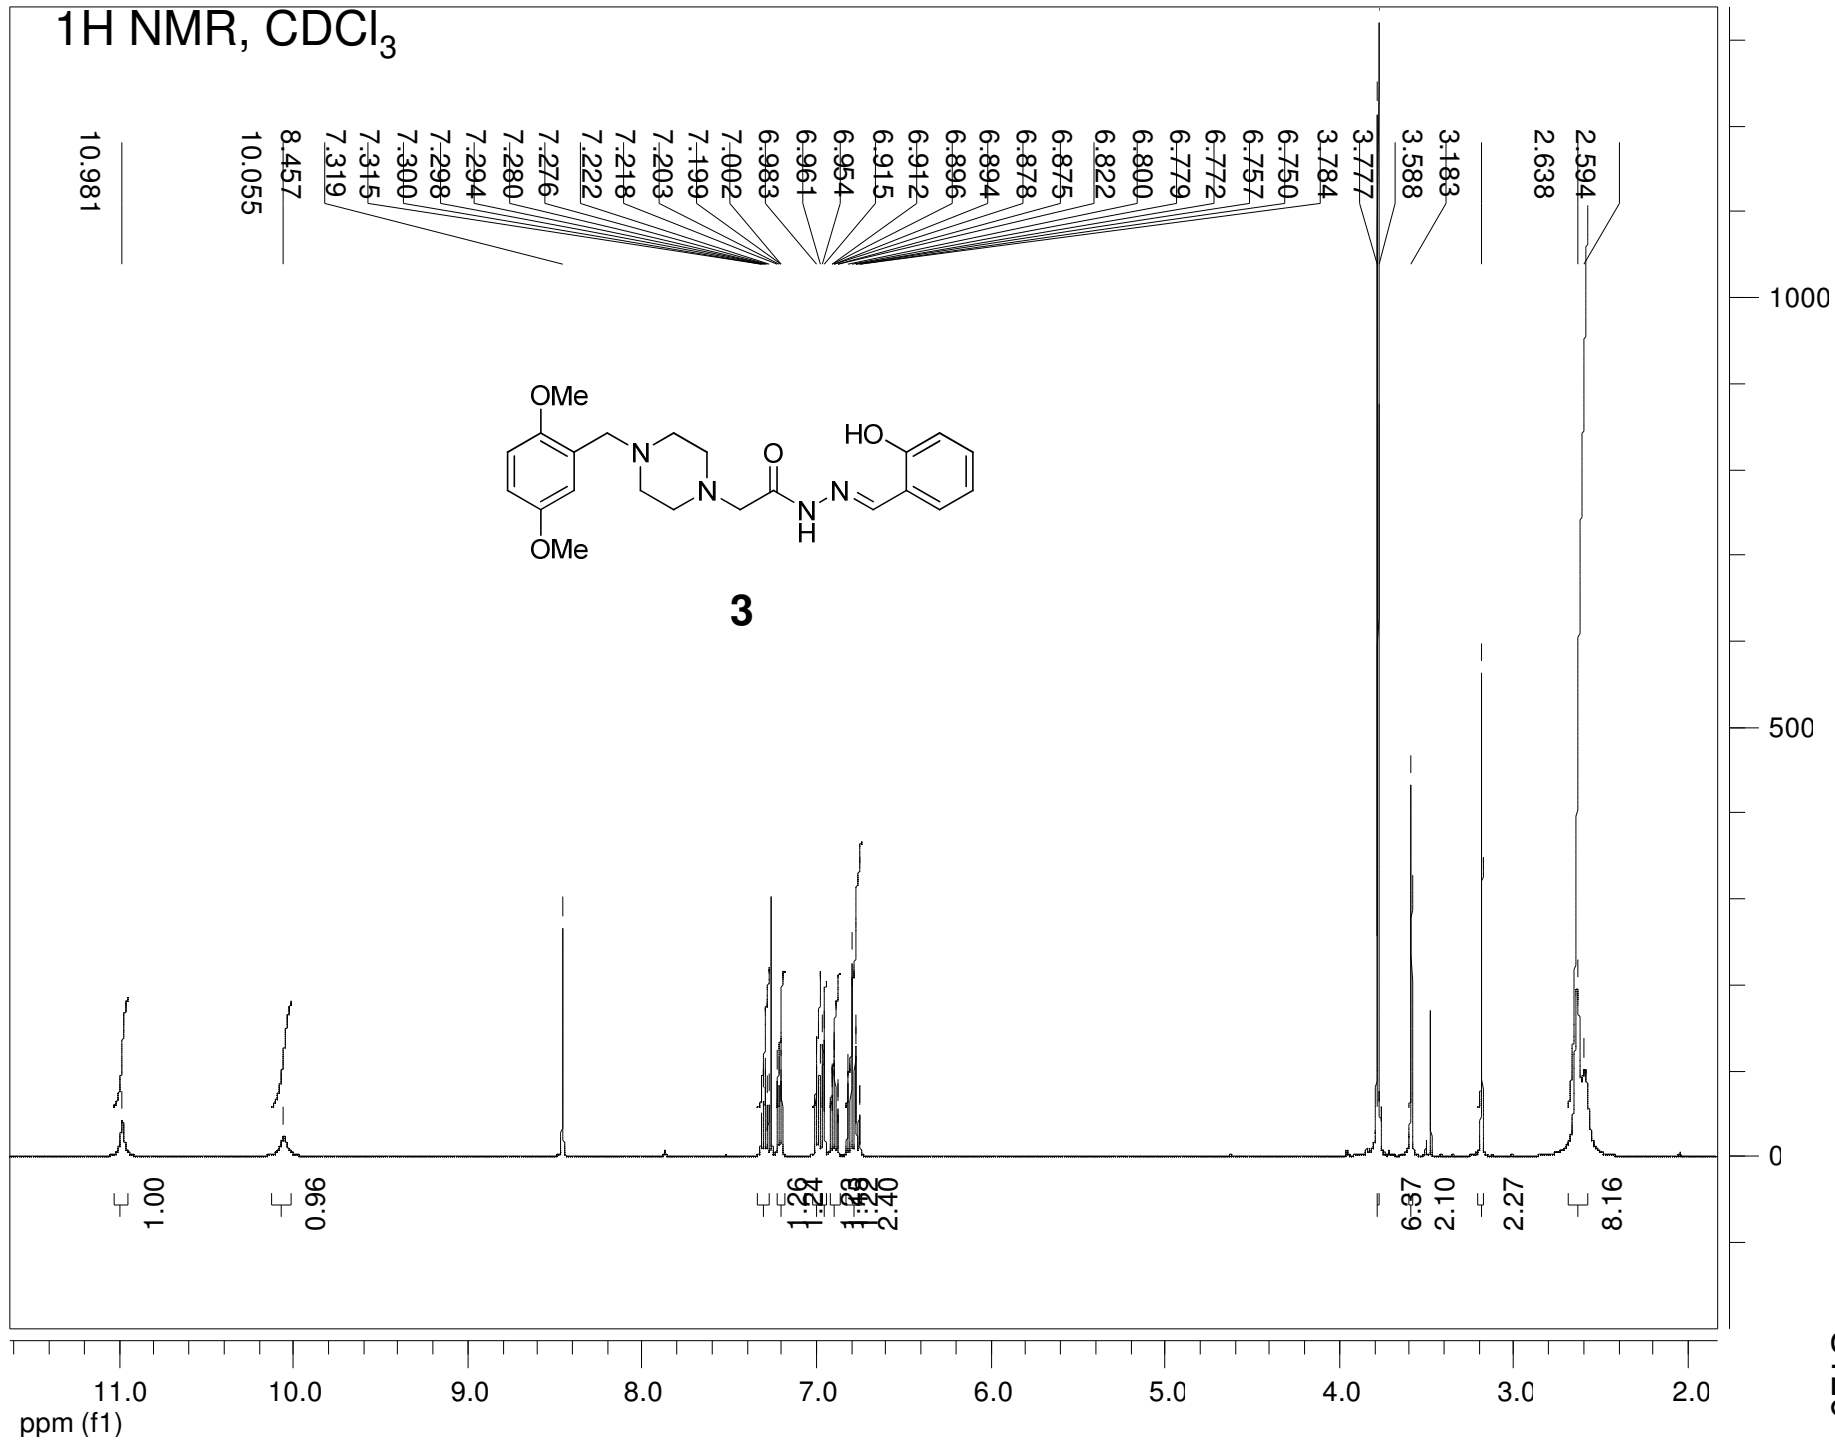

<sup>13</sup>C NMR, CDCl<sub>3</sub>

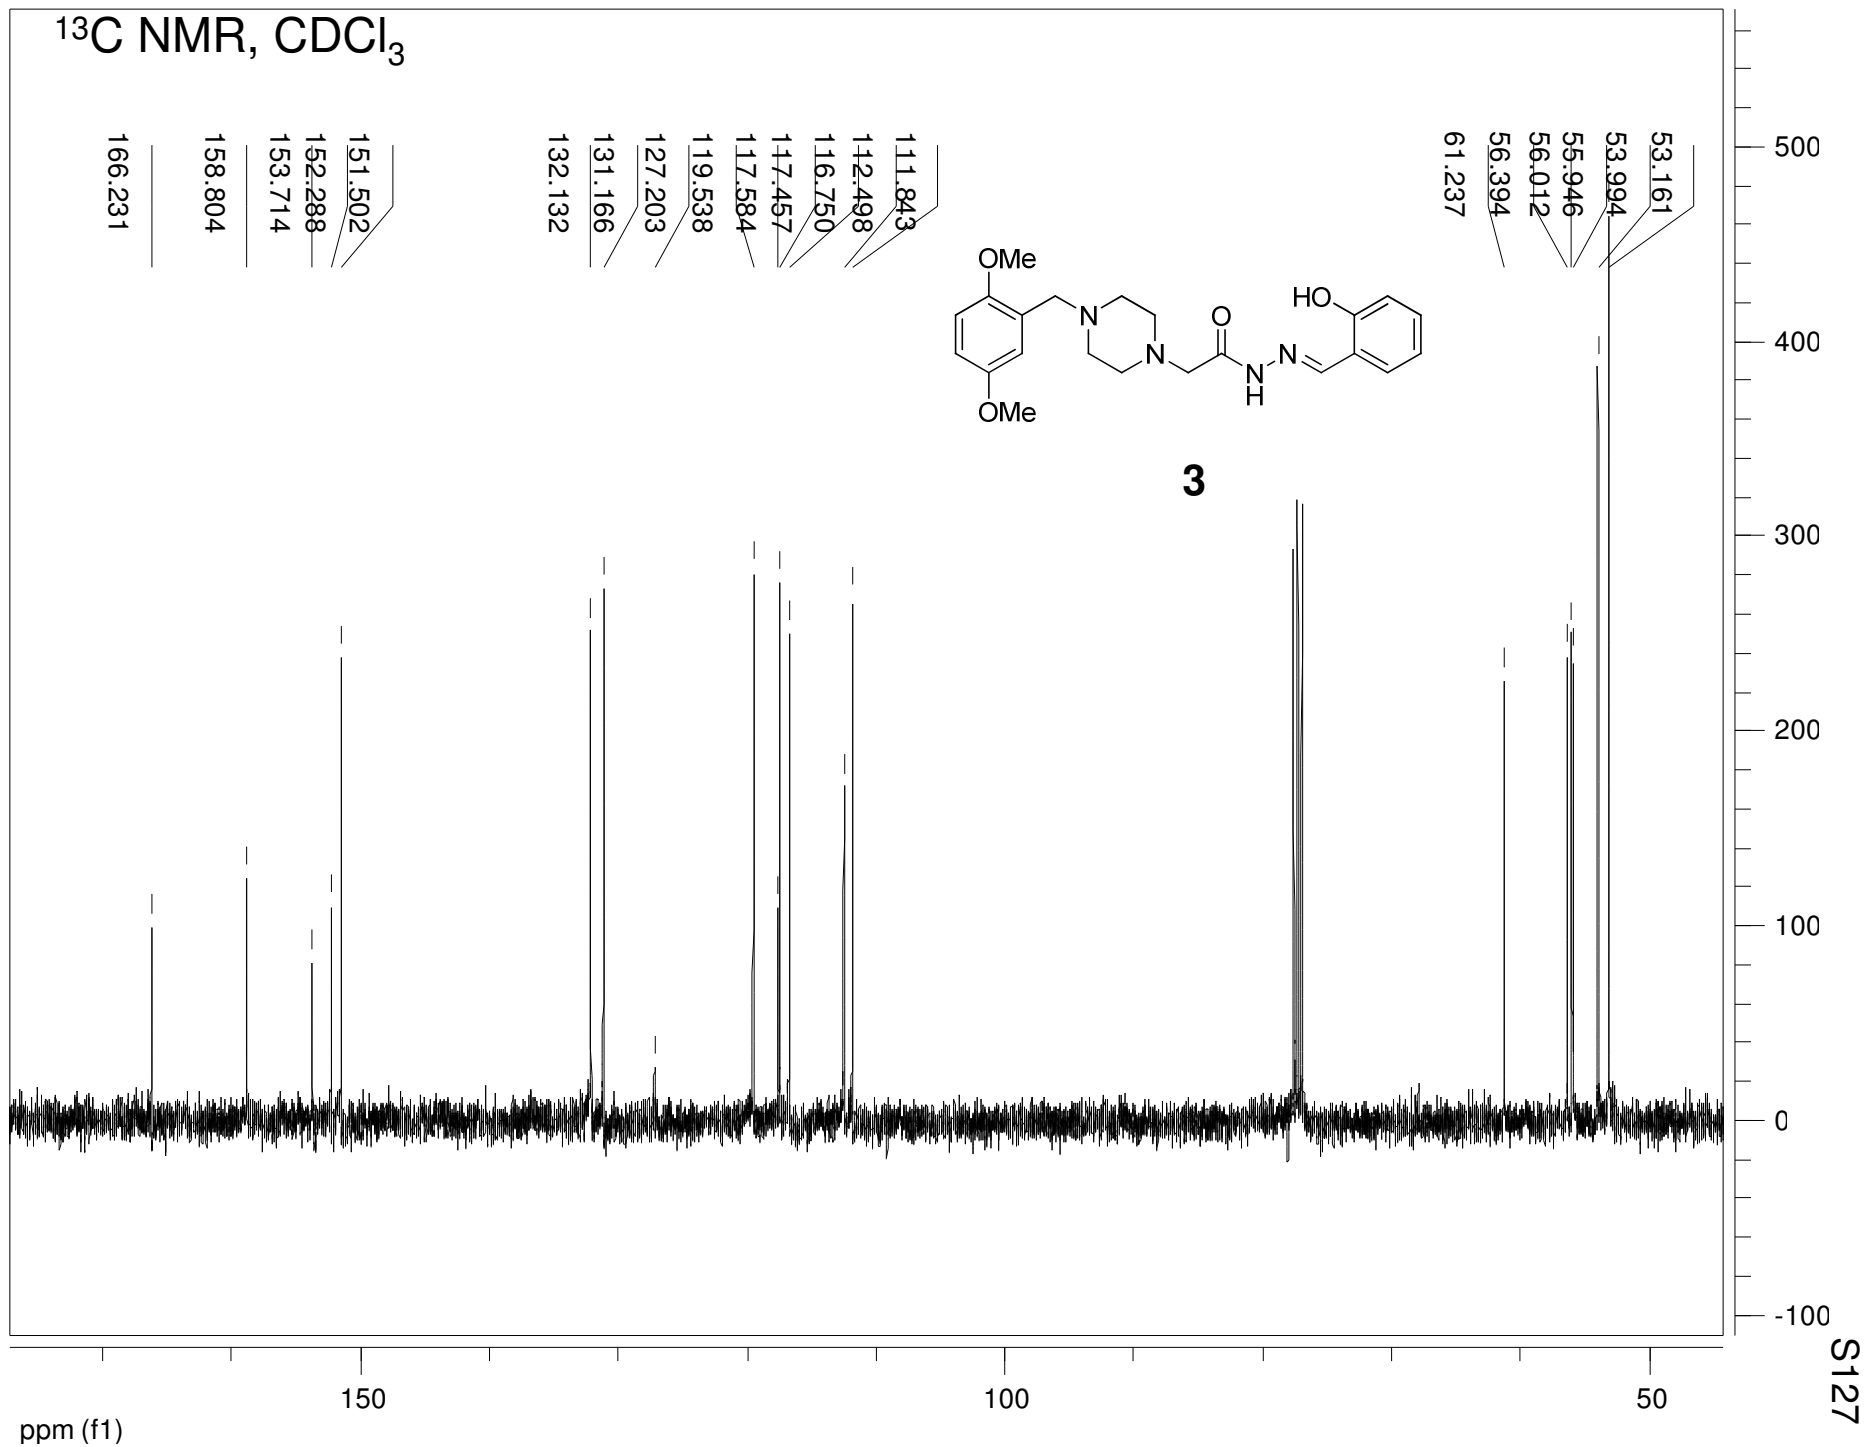

LC-MS

Purity: 98%

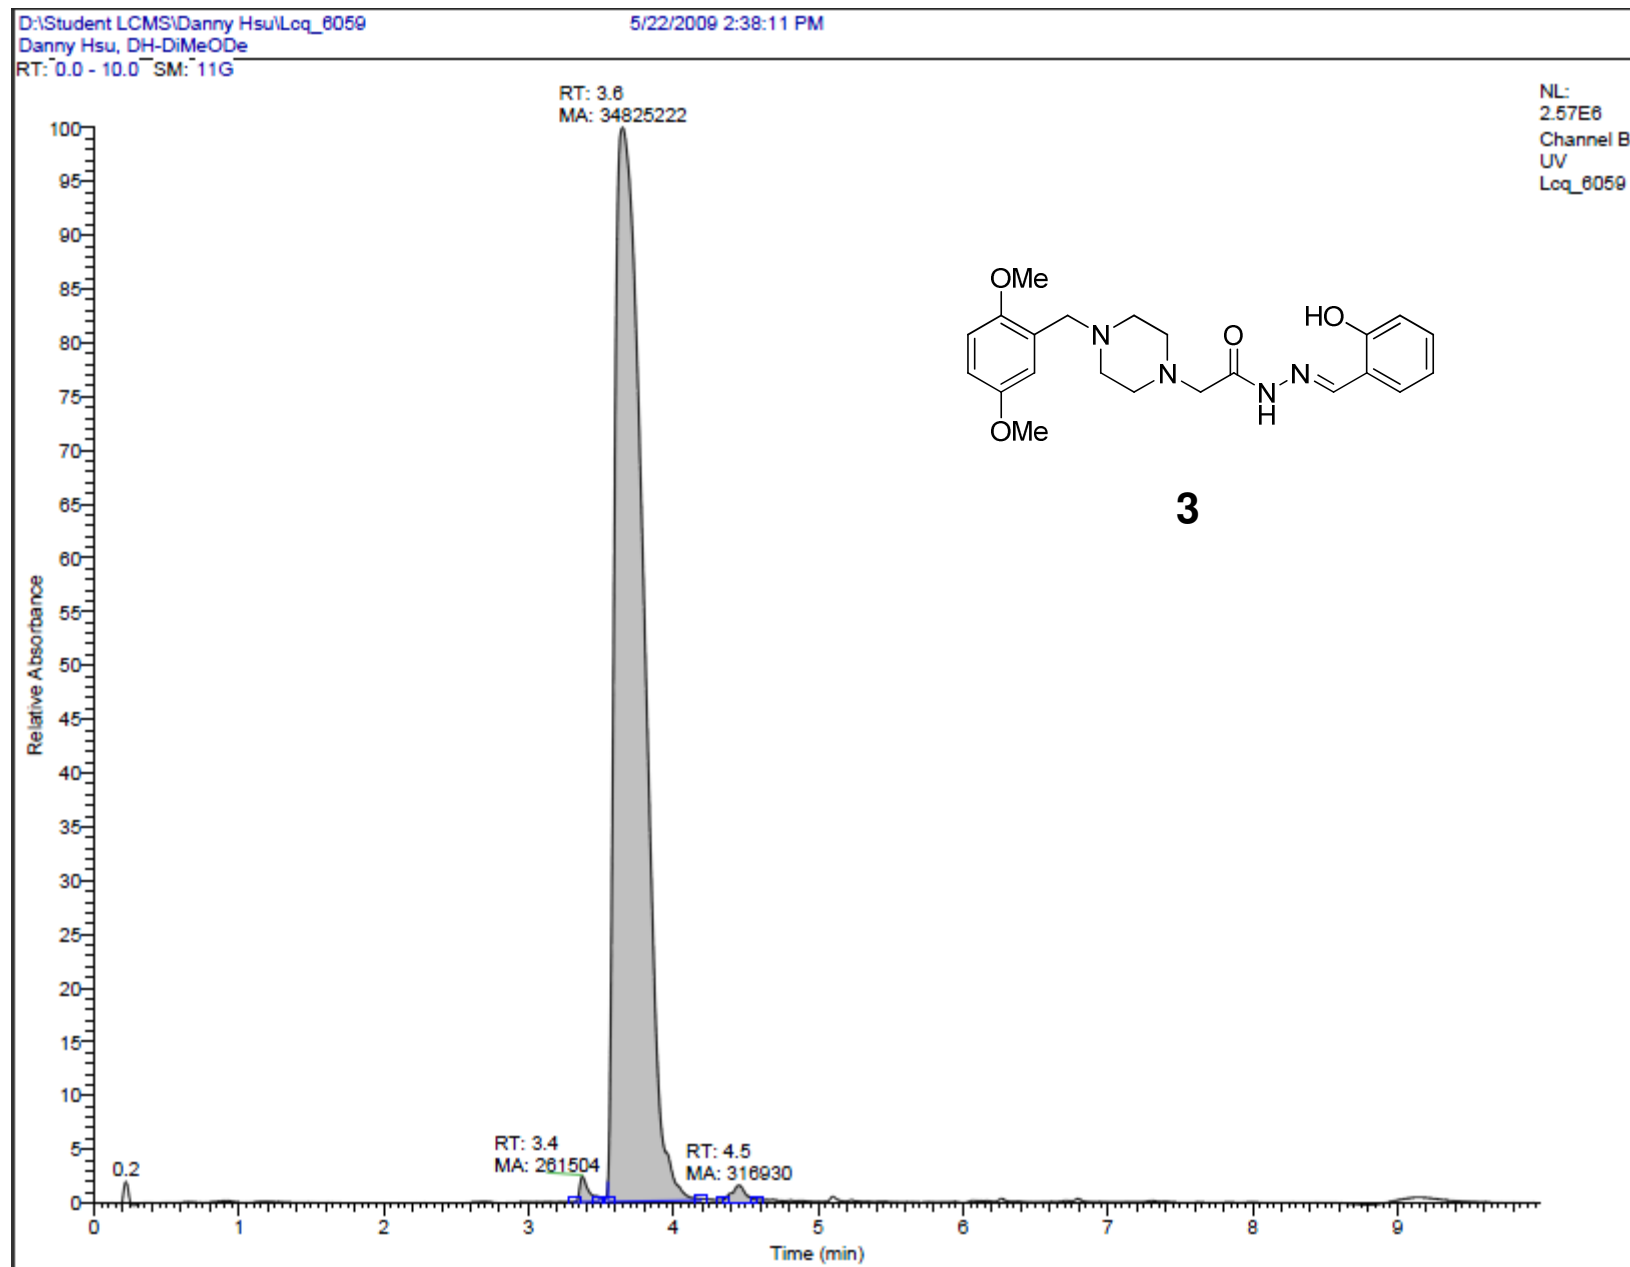

$^1\text{H NMR}$ ,  $\text{CDCl}_3$

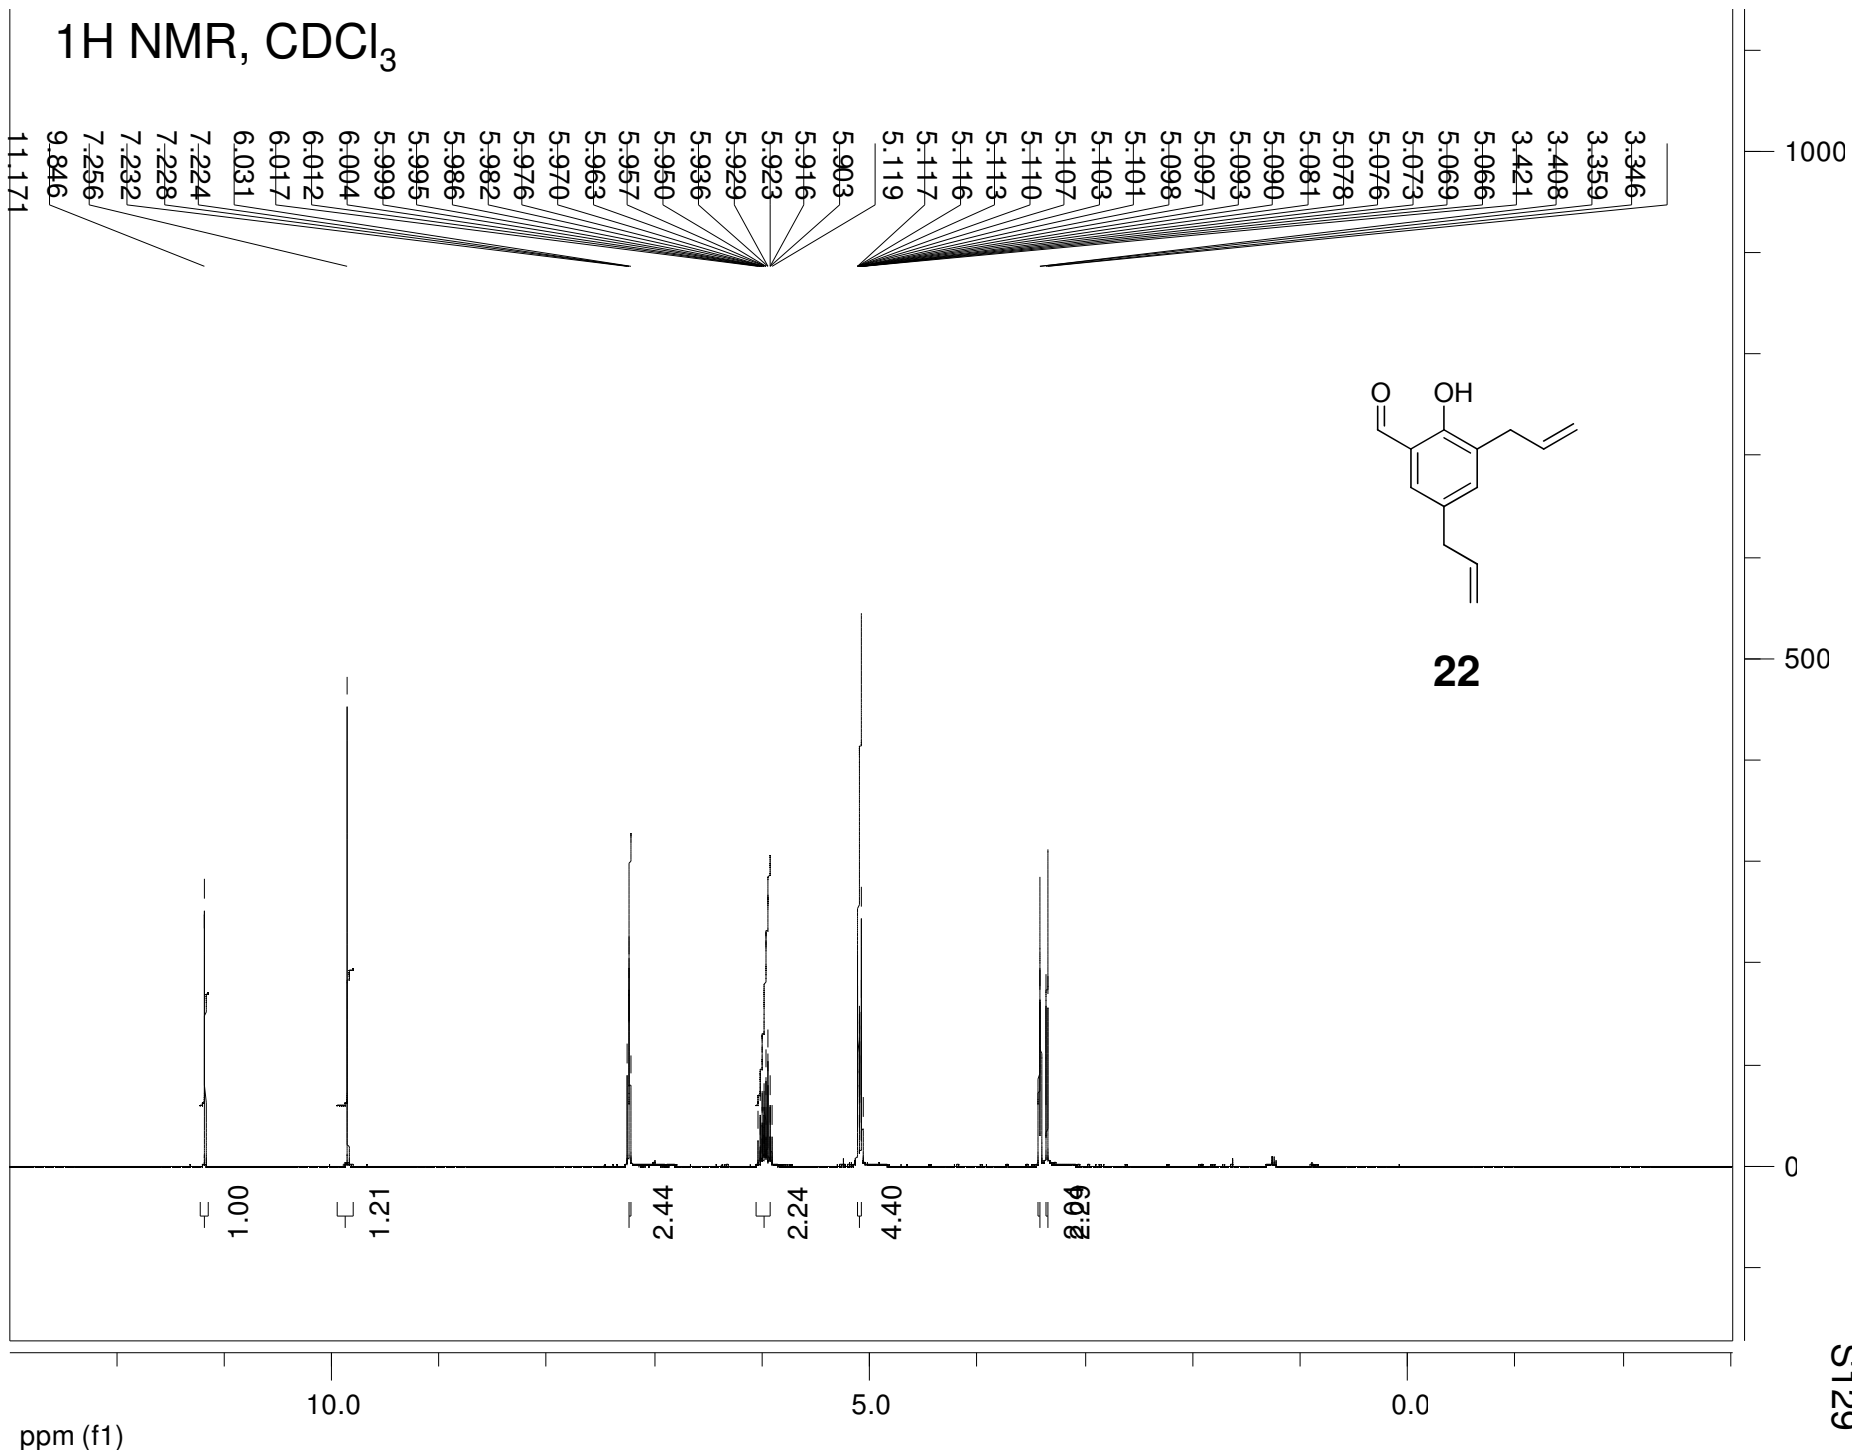

<sup>13</sup>C NMR, CDCl<sub>3</sub>

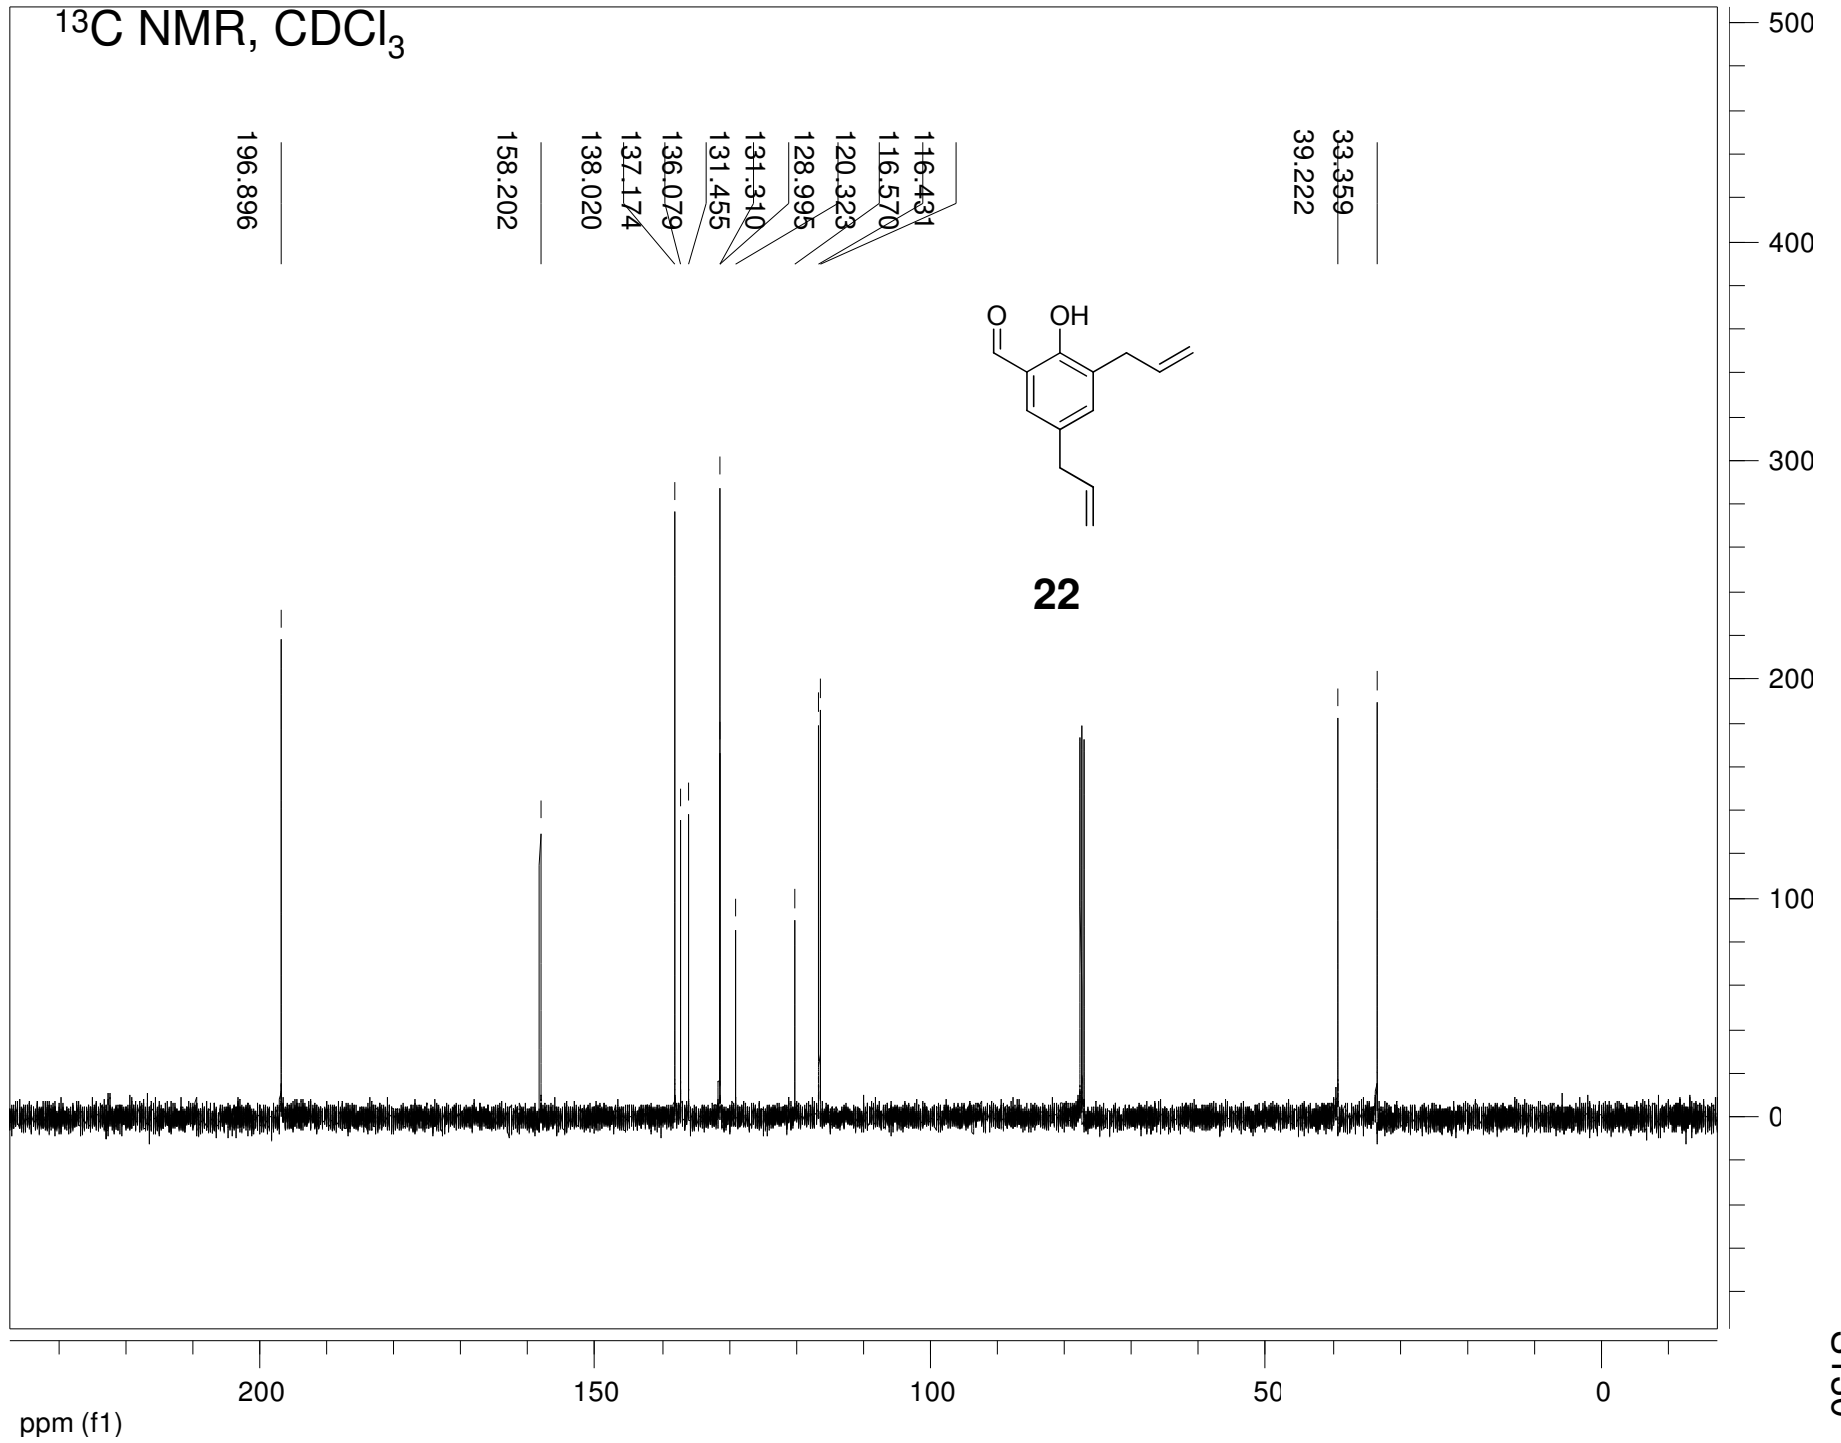

S130

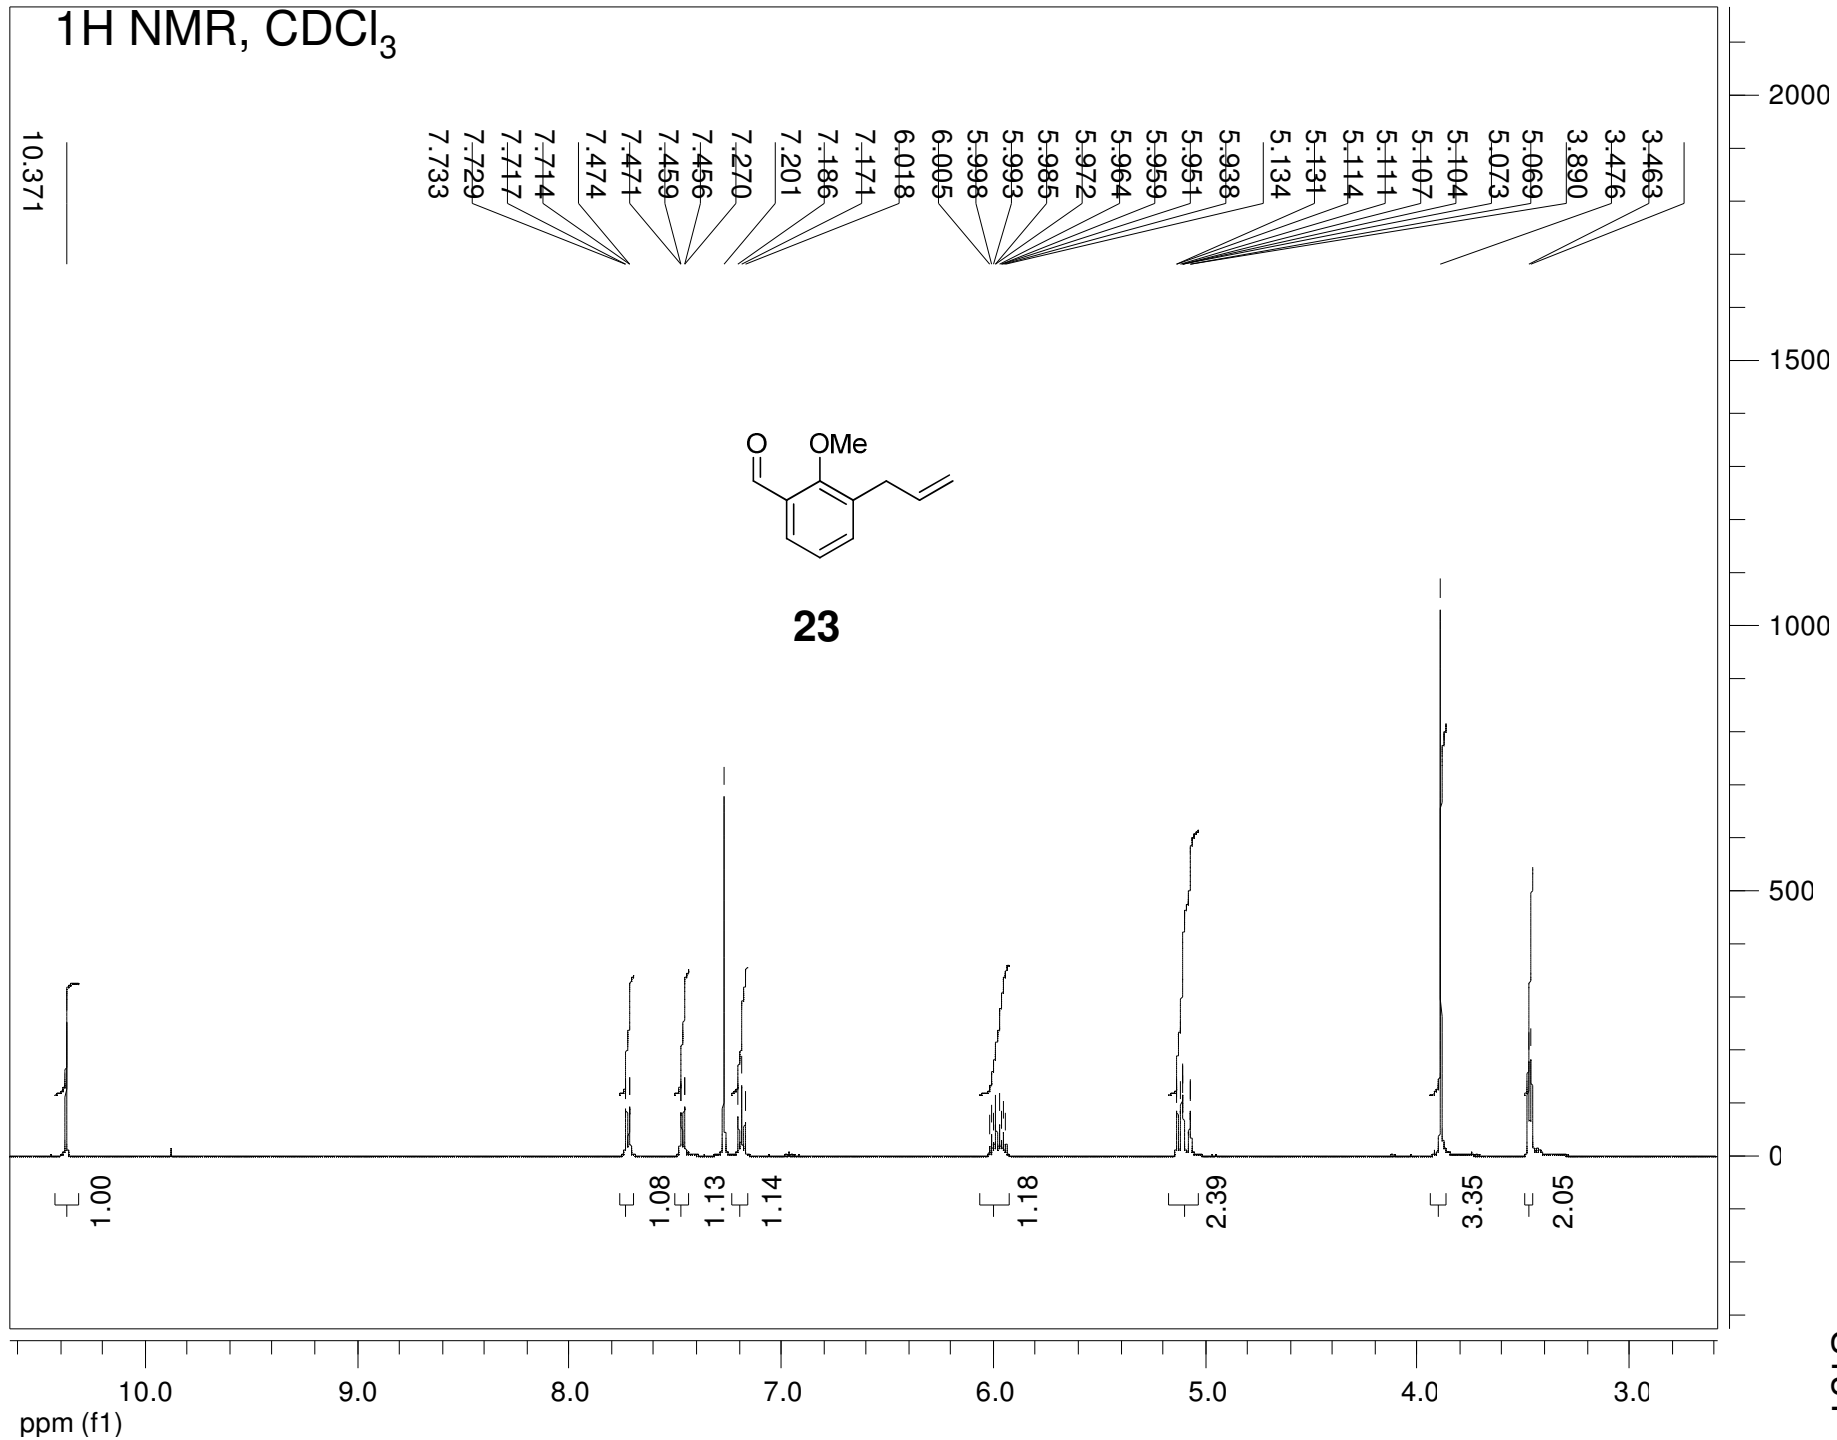

$^{13}\text{C}$  NMR,  $\text{CDCl}_3$

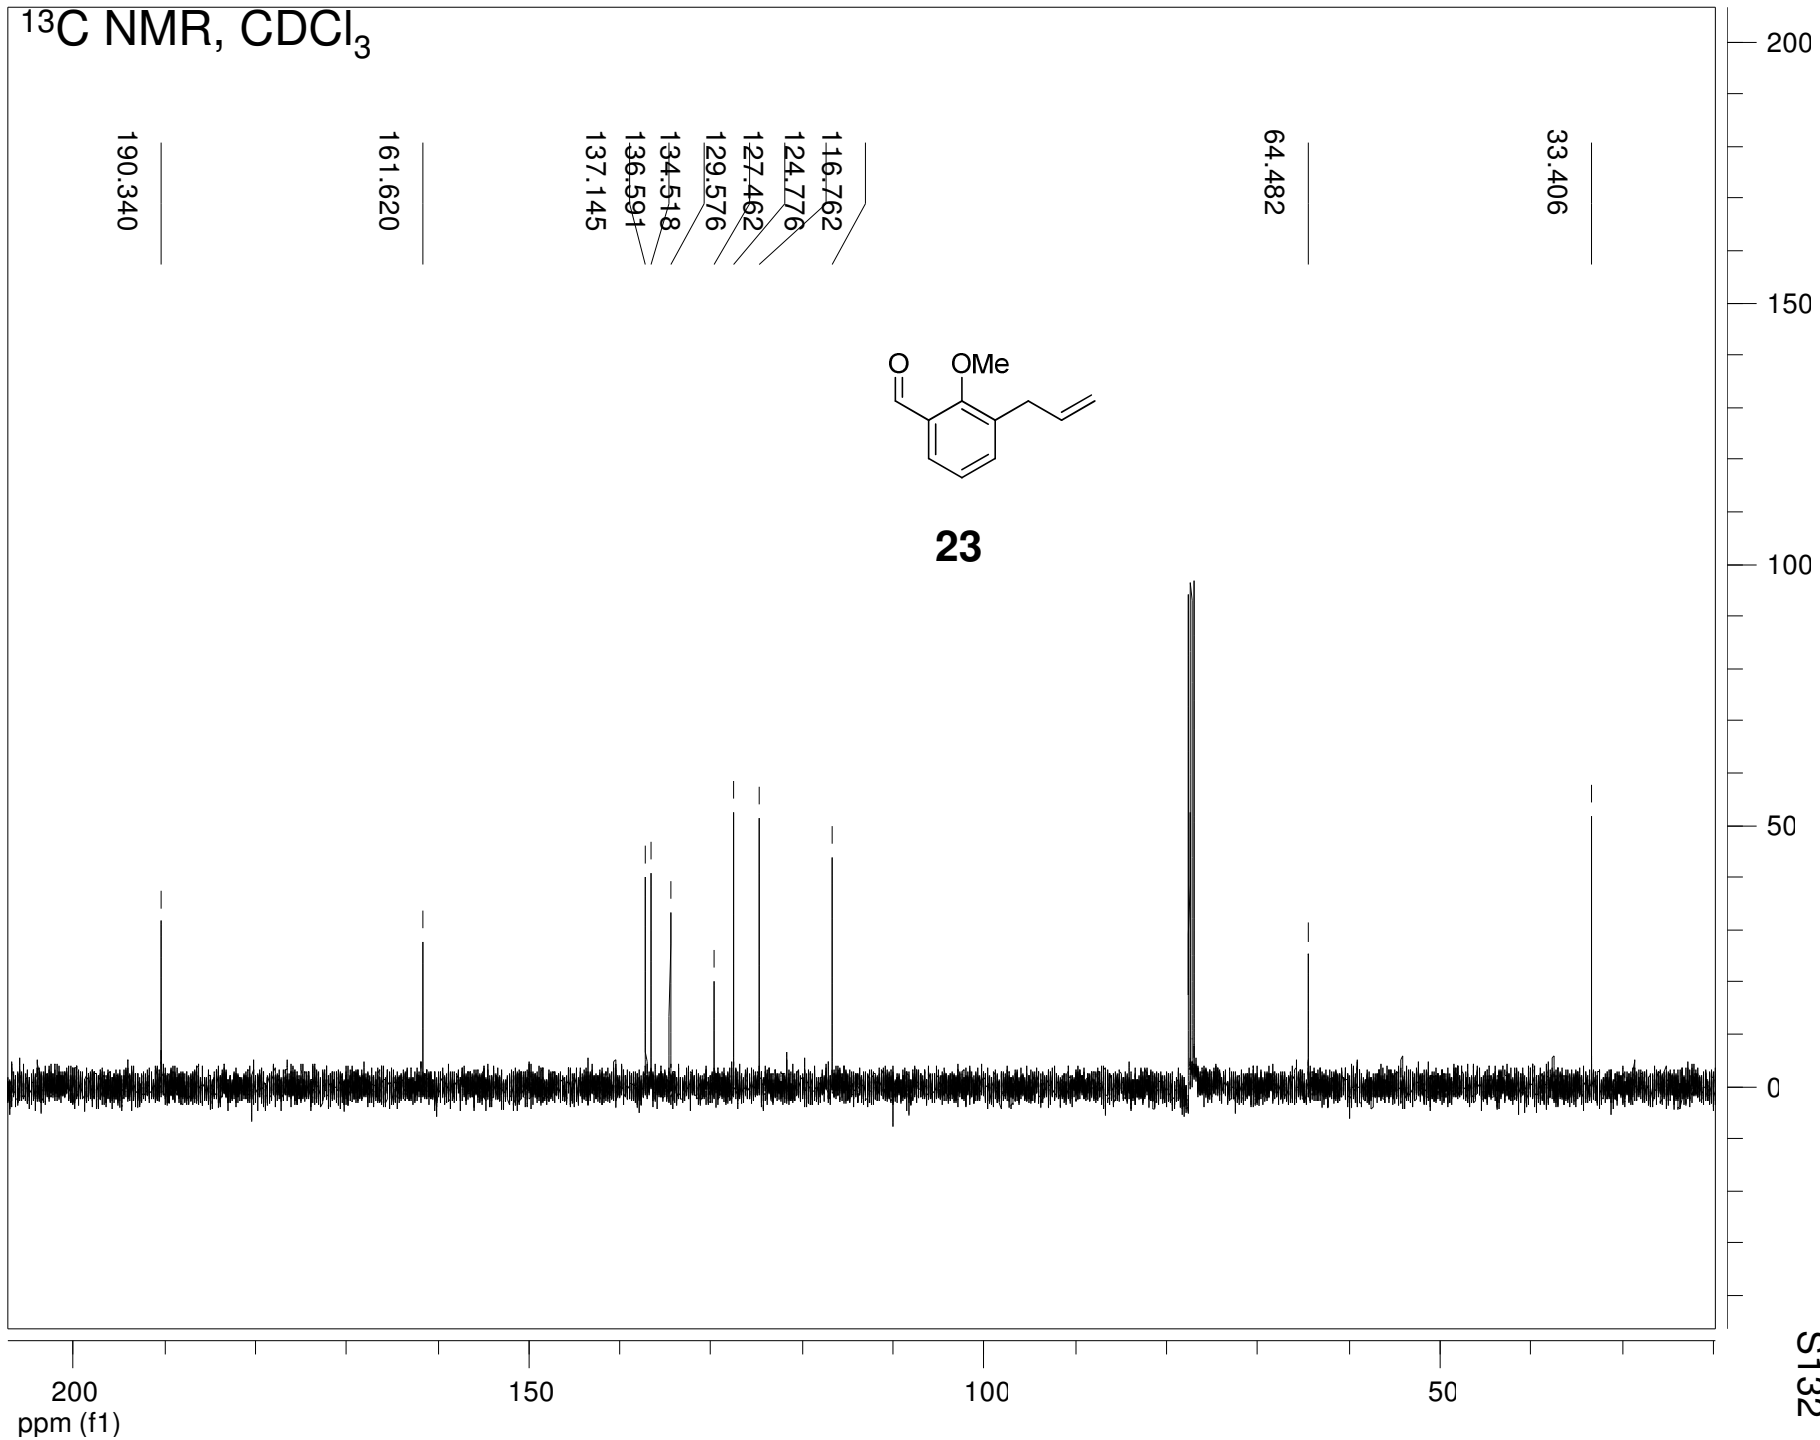





<sup>13</sup>C NMR, CDCl<sub>3</sub>

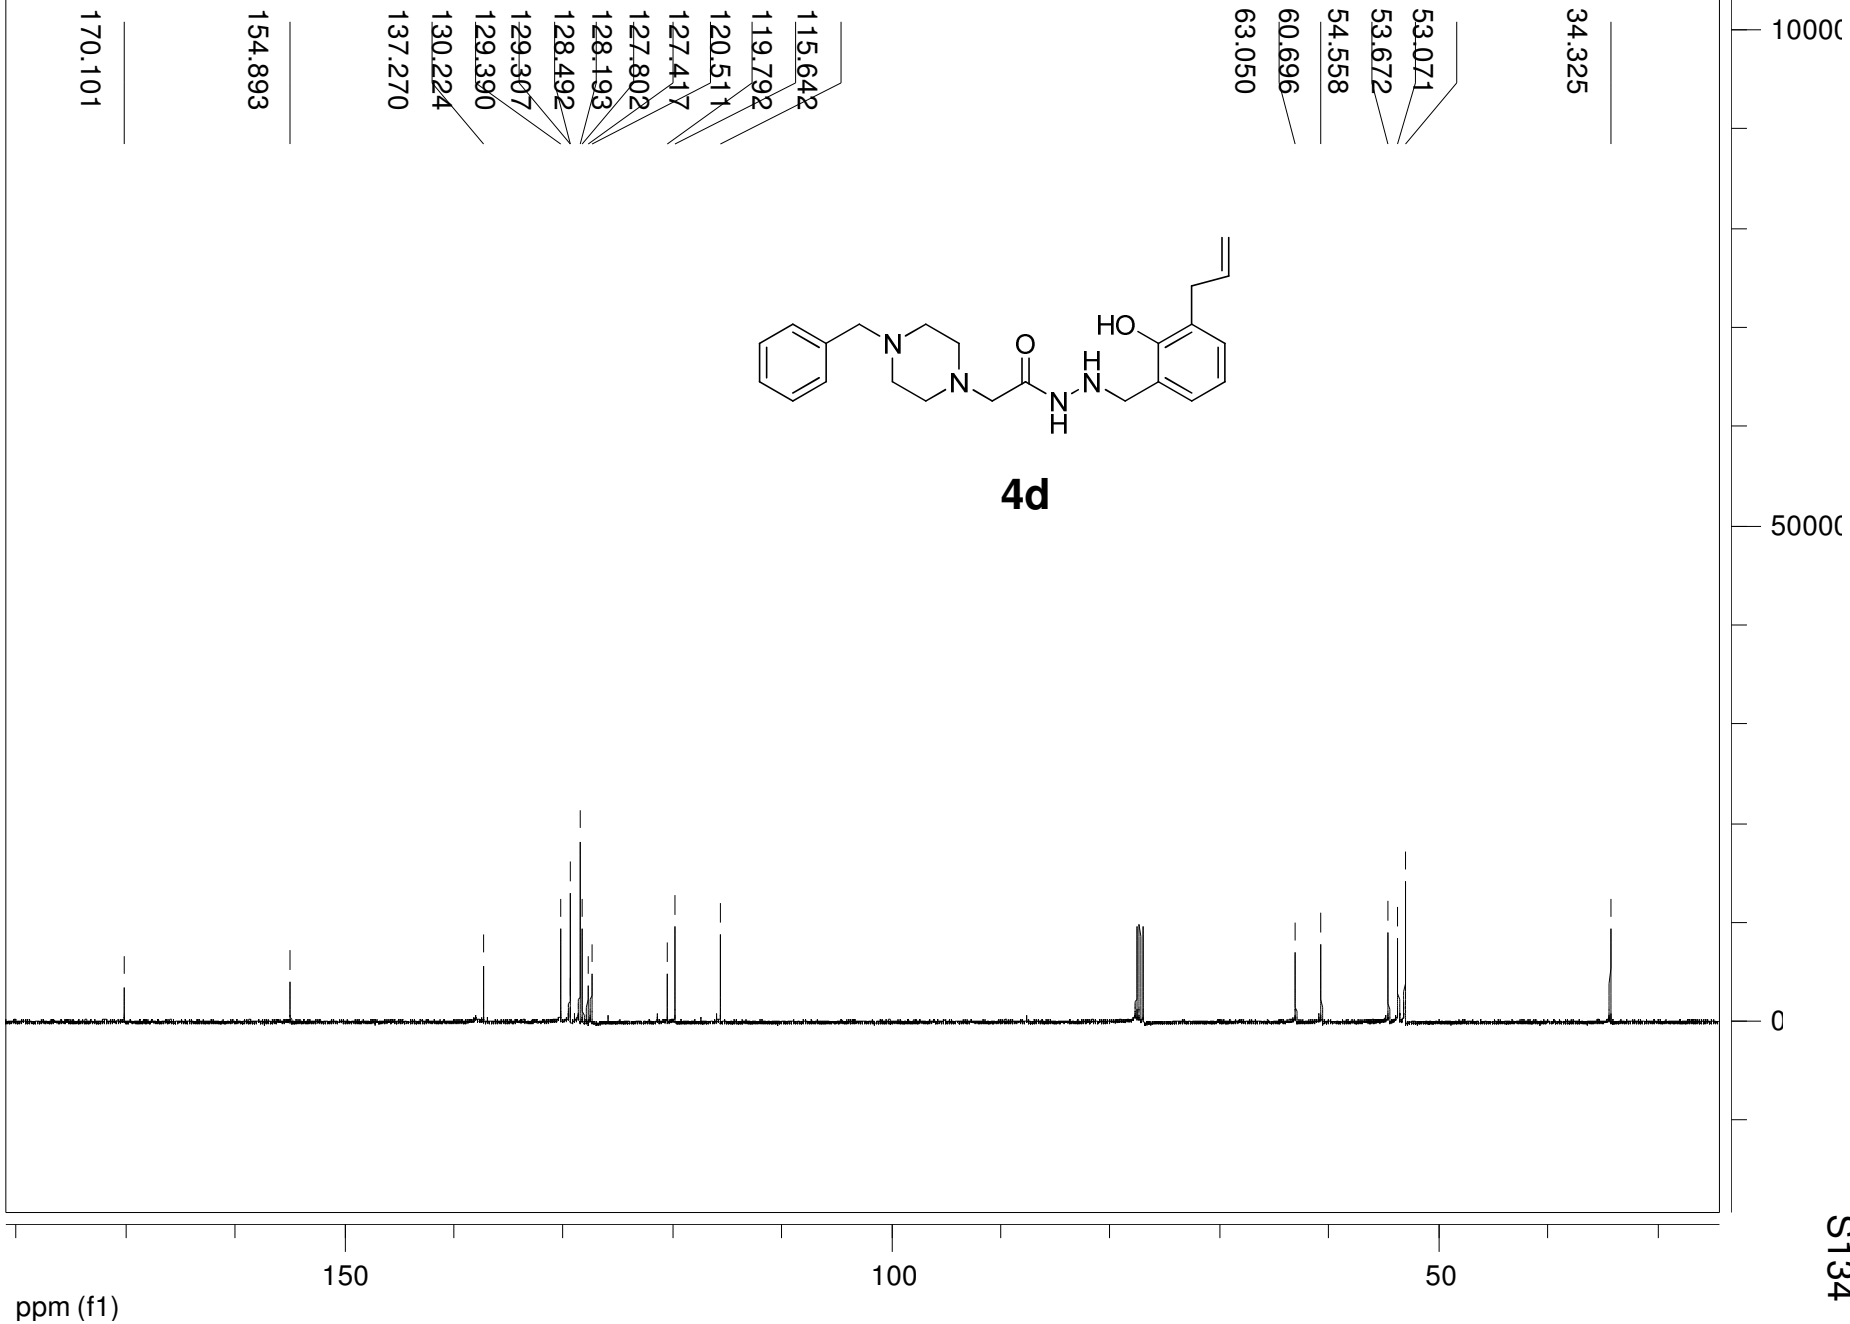

# HPLC

Data File D:\HPCHEM\DATA\2009\DH\DE\_RED.D  
 Sample Name: DH-RED

```

=====
Acq. Operator   : DH
Acq. Instrument : EI Chupacabra
Injection Date  : 5/25/2009 12:29:23 AM
Location       : P1-F-07
Inj Volume     : 10 µl

Acq. Method    : C:\HPCHEM\1\METHODS\DH.M
Last changed   : 5/24/2009 11:34:17 PM by DH
                (modified after loading)
Analysis Method: C:\HPCHEM\1\METHODS\DH.M
Last changed   : 5/24/2009 7:59:02 PM by TMA
  
```

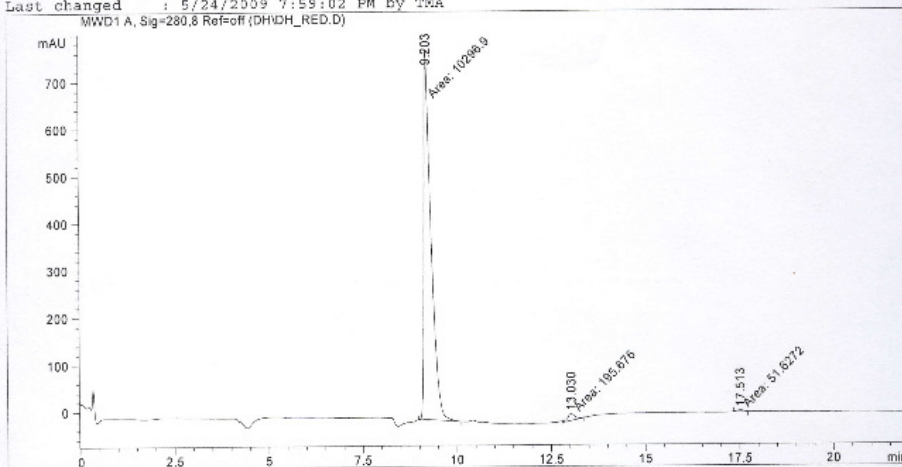

Fraction Information

Fraction collection off  
 No Fractions found.

Area Percent Report

Sorted By : Signal  
 Multiplier : 1.0000  
 Dilution : 1.0000  
 Use Multiplier & Dilution Factor with ISTDs

Signal 1: MWD1 A, Sig=280.8 Ref=off

| Peak # | RetTime (min) | Type | Width (min) | Area [mAU*s] | Height [mAU] | Area %  |
|--------|---------------|------|-------------|--------------|--------------|---------|
| 1      | 9.203         | MM   | 0.2198      | 1.02969e4    | 780.93475    | 97.6546 |
| 2      | 13.030        | MM   | 0.2233      | 195.67628    | 14.60288     | 1.8558  |
| 3      | 17.513        | MM   | 0.2340      | 51.62722     | 3.67708      | 0.4896  |

Totals : 1.05442e4 799.21470

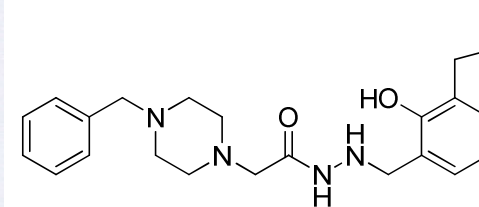

**4d**

1H NMR, CDCl<sub>3</sub>

7.262  
7.272  
7.200  
7.188  
7.184  
7.173  
7.154  
7.151  
7.137

4.203  
4.188  
4.174  
4.160  
3.184  
2.932  
2.909  
2.551  
2.537  
2.127  
2.122  
2.103  
2.099  
2.080  
2.076  
1.646  
1.643  
1.632  
1.619  
1.617  
1.554  
1.546  
1.539  
1.532  
1.524  
1.517  
1.509  
1.444  
1.439  
1.412  
1.394  
1.387  
1.367  
1.351

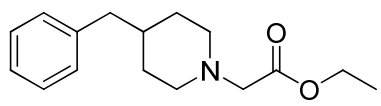

43

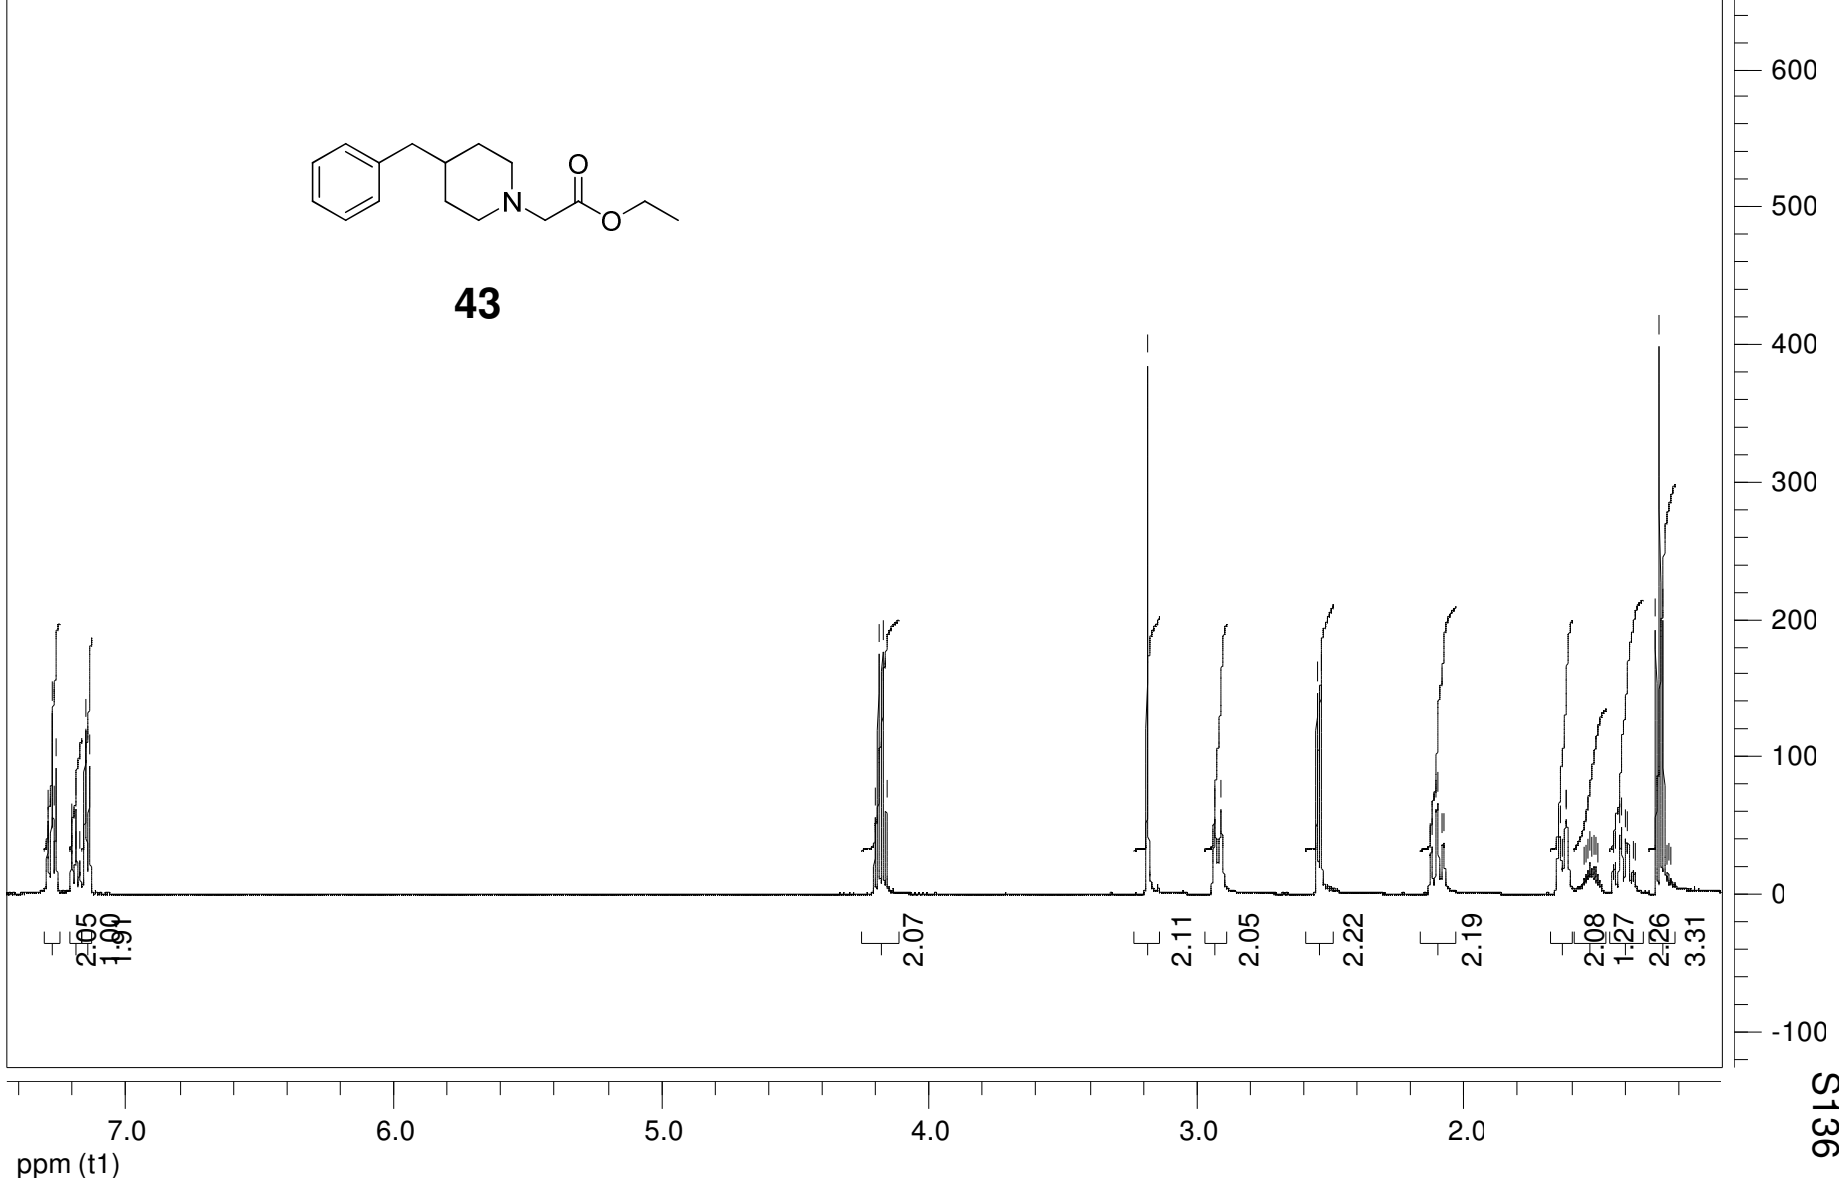

<sup>13</sup>C NMR, CDCl<sub>3</sub>

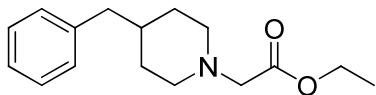

**43**

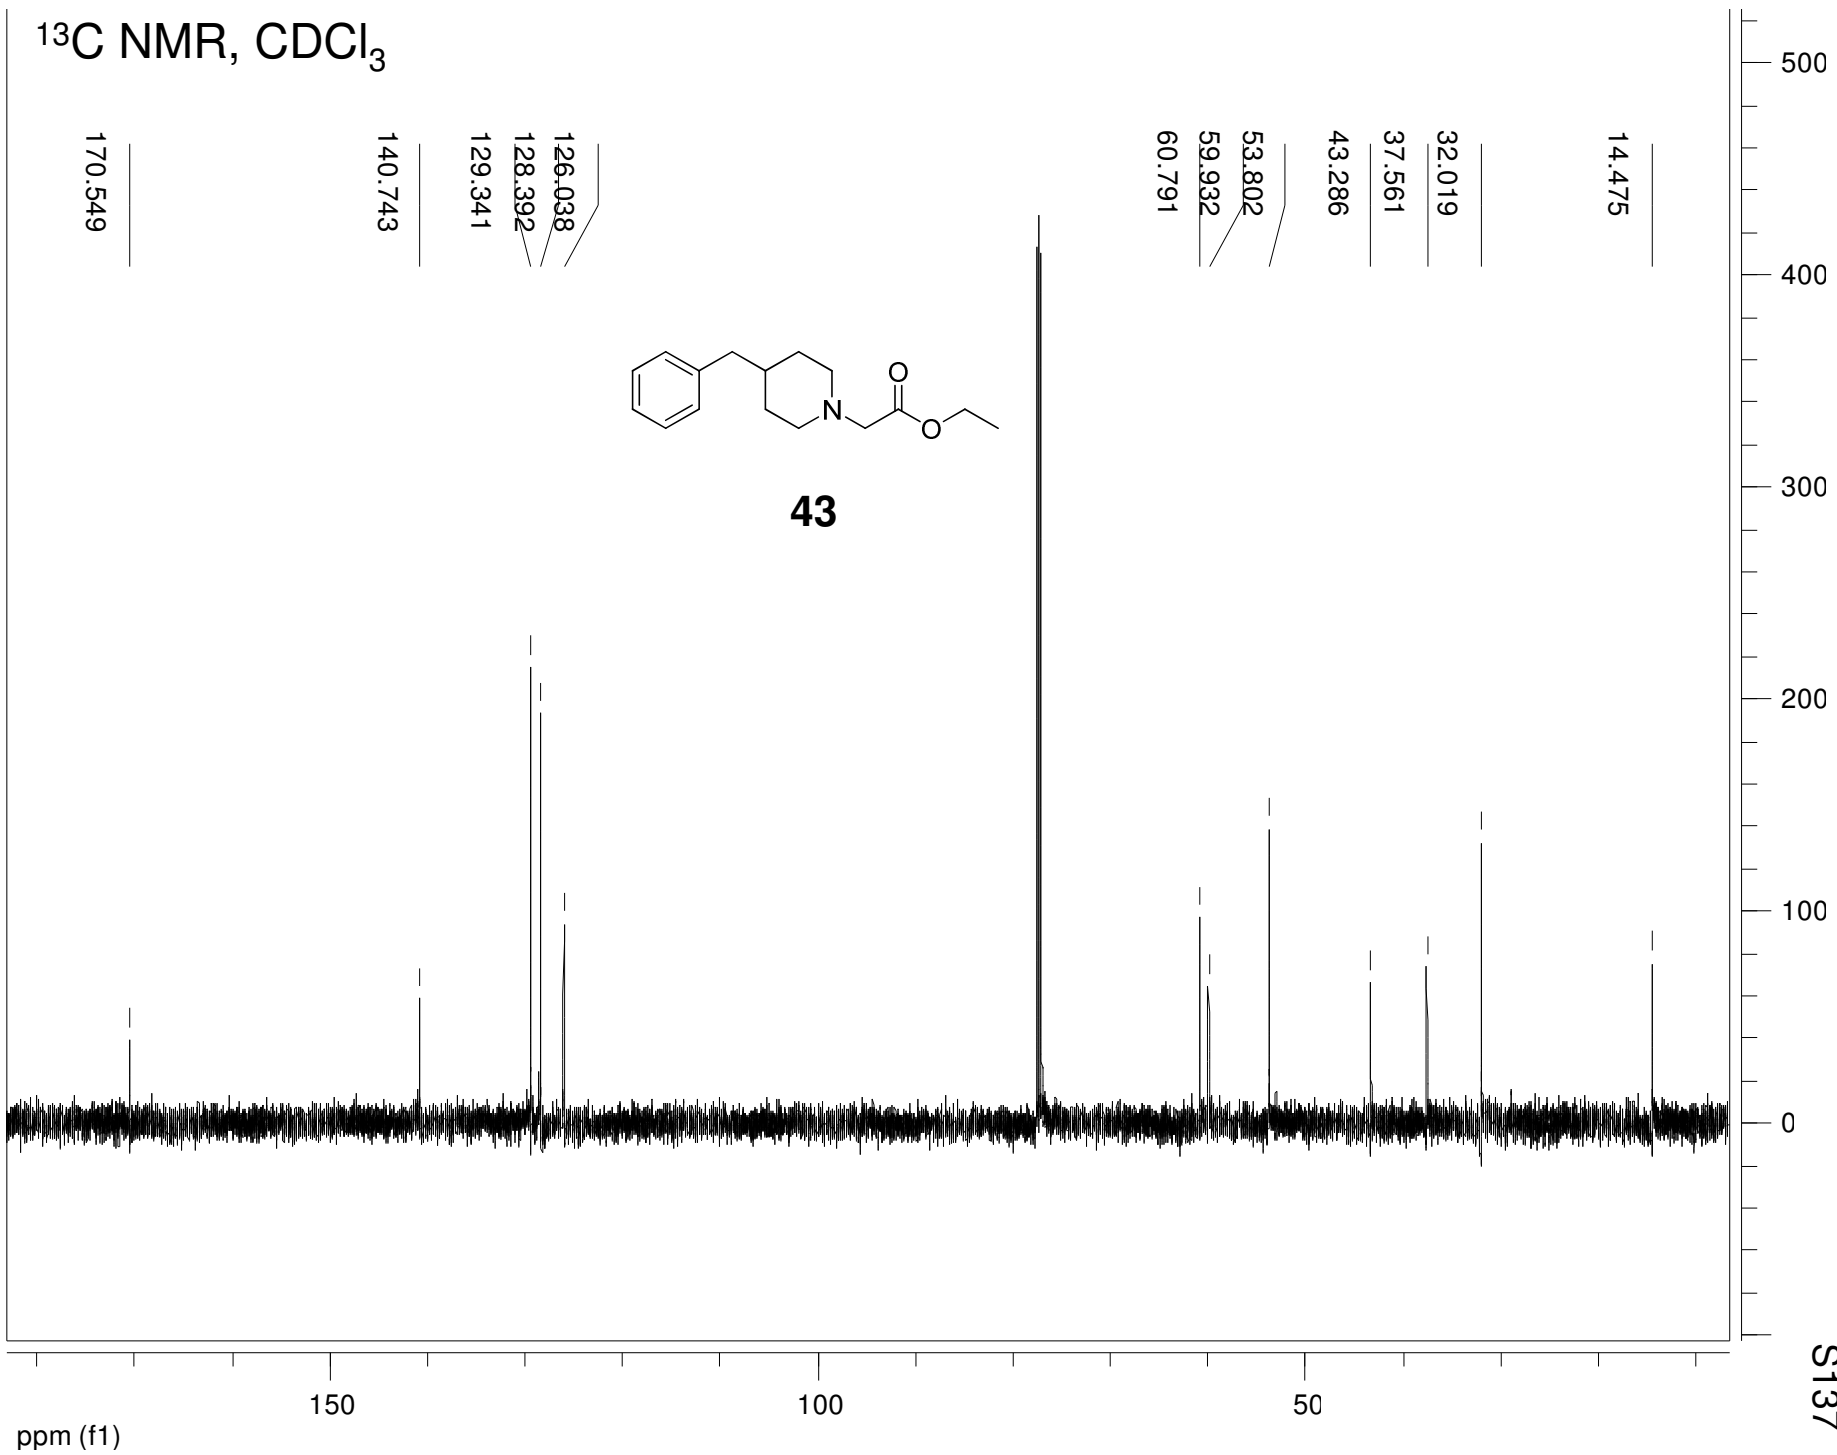

1H NMR, CDCl<sub>3</sub>

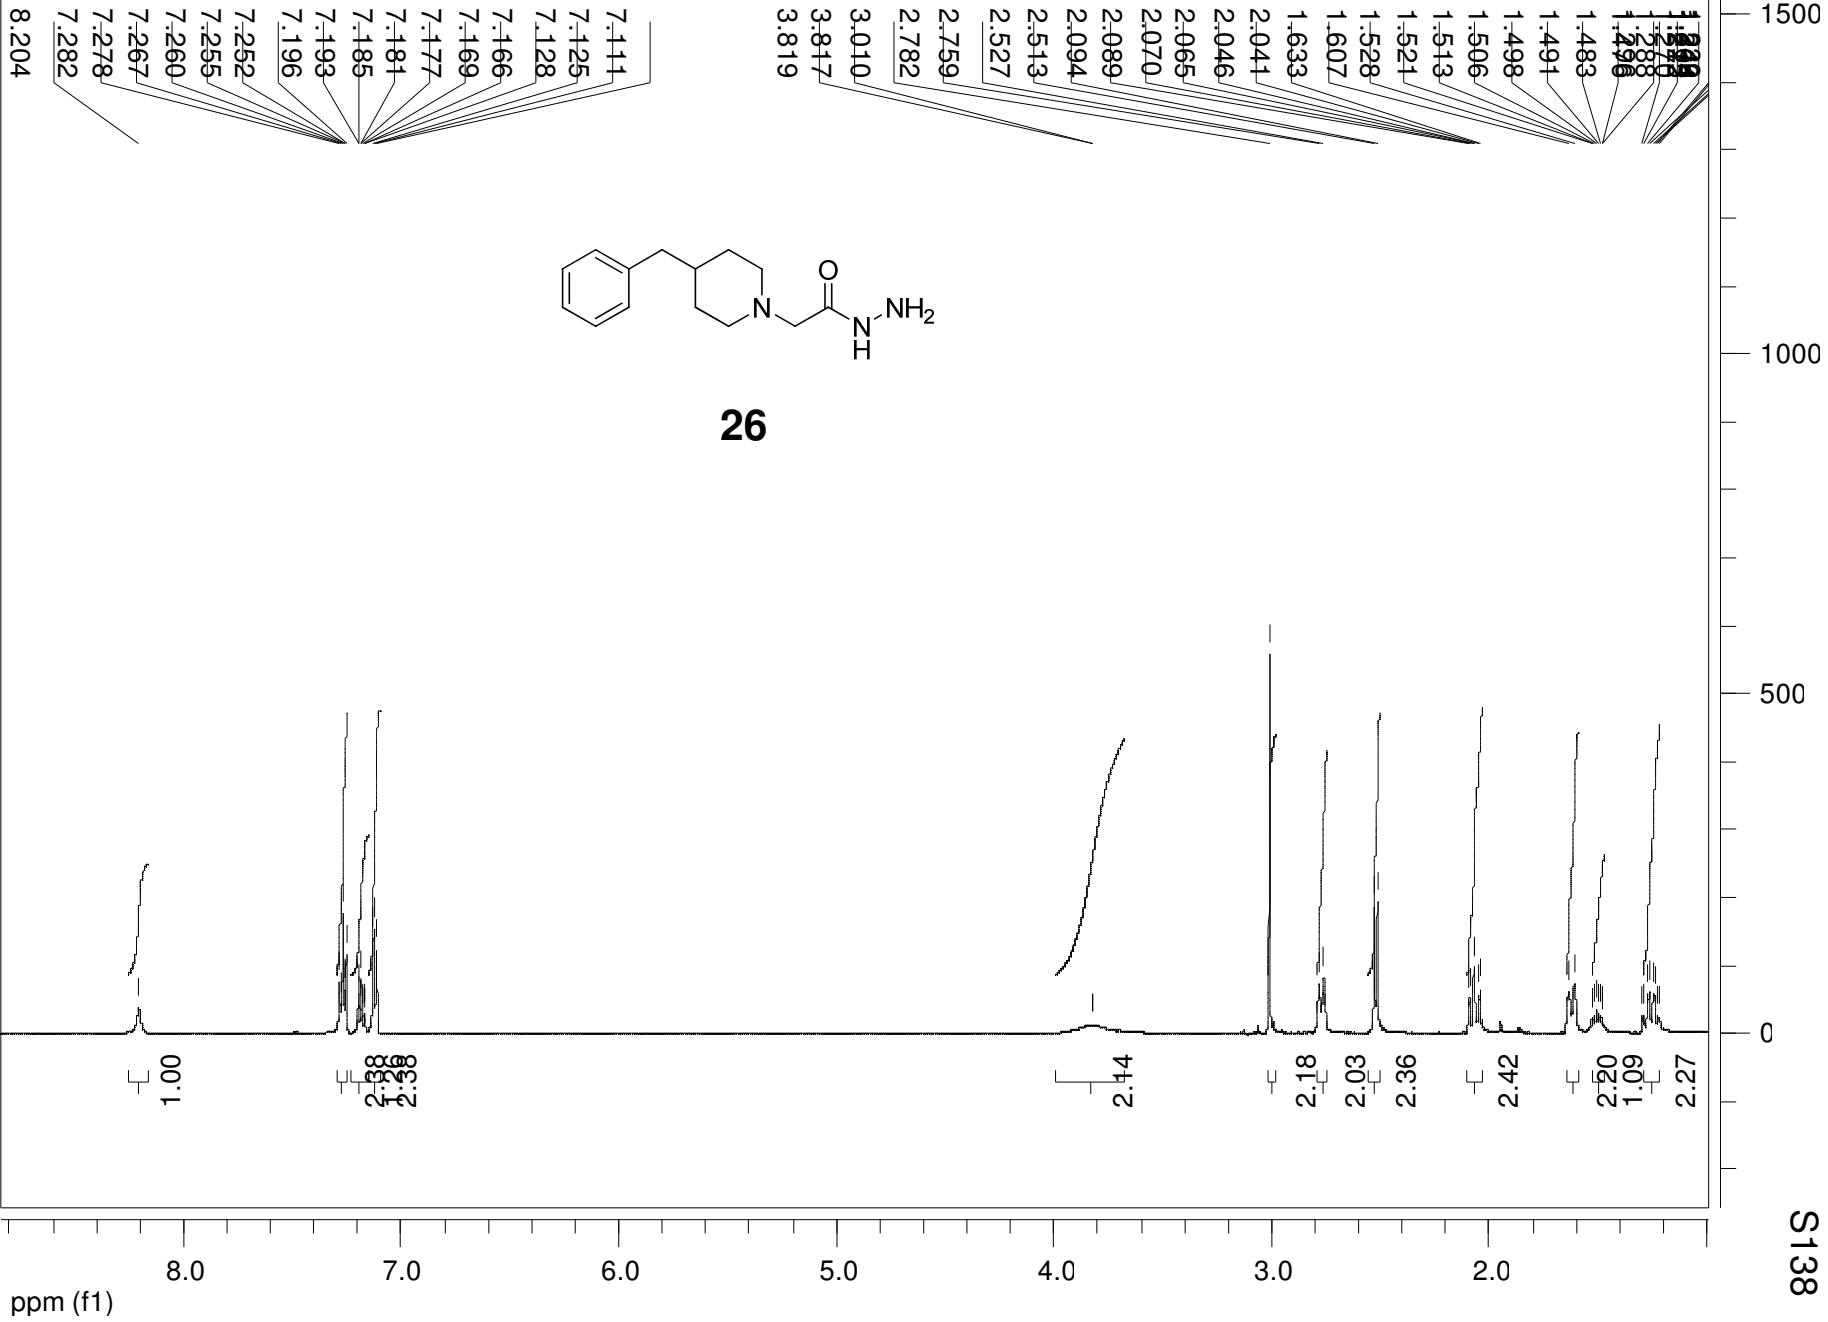

<sup>13</sup>C NMR, CDCl<sub>3</sub>

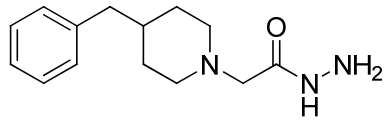

**26**

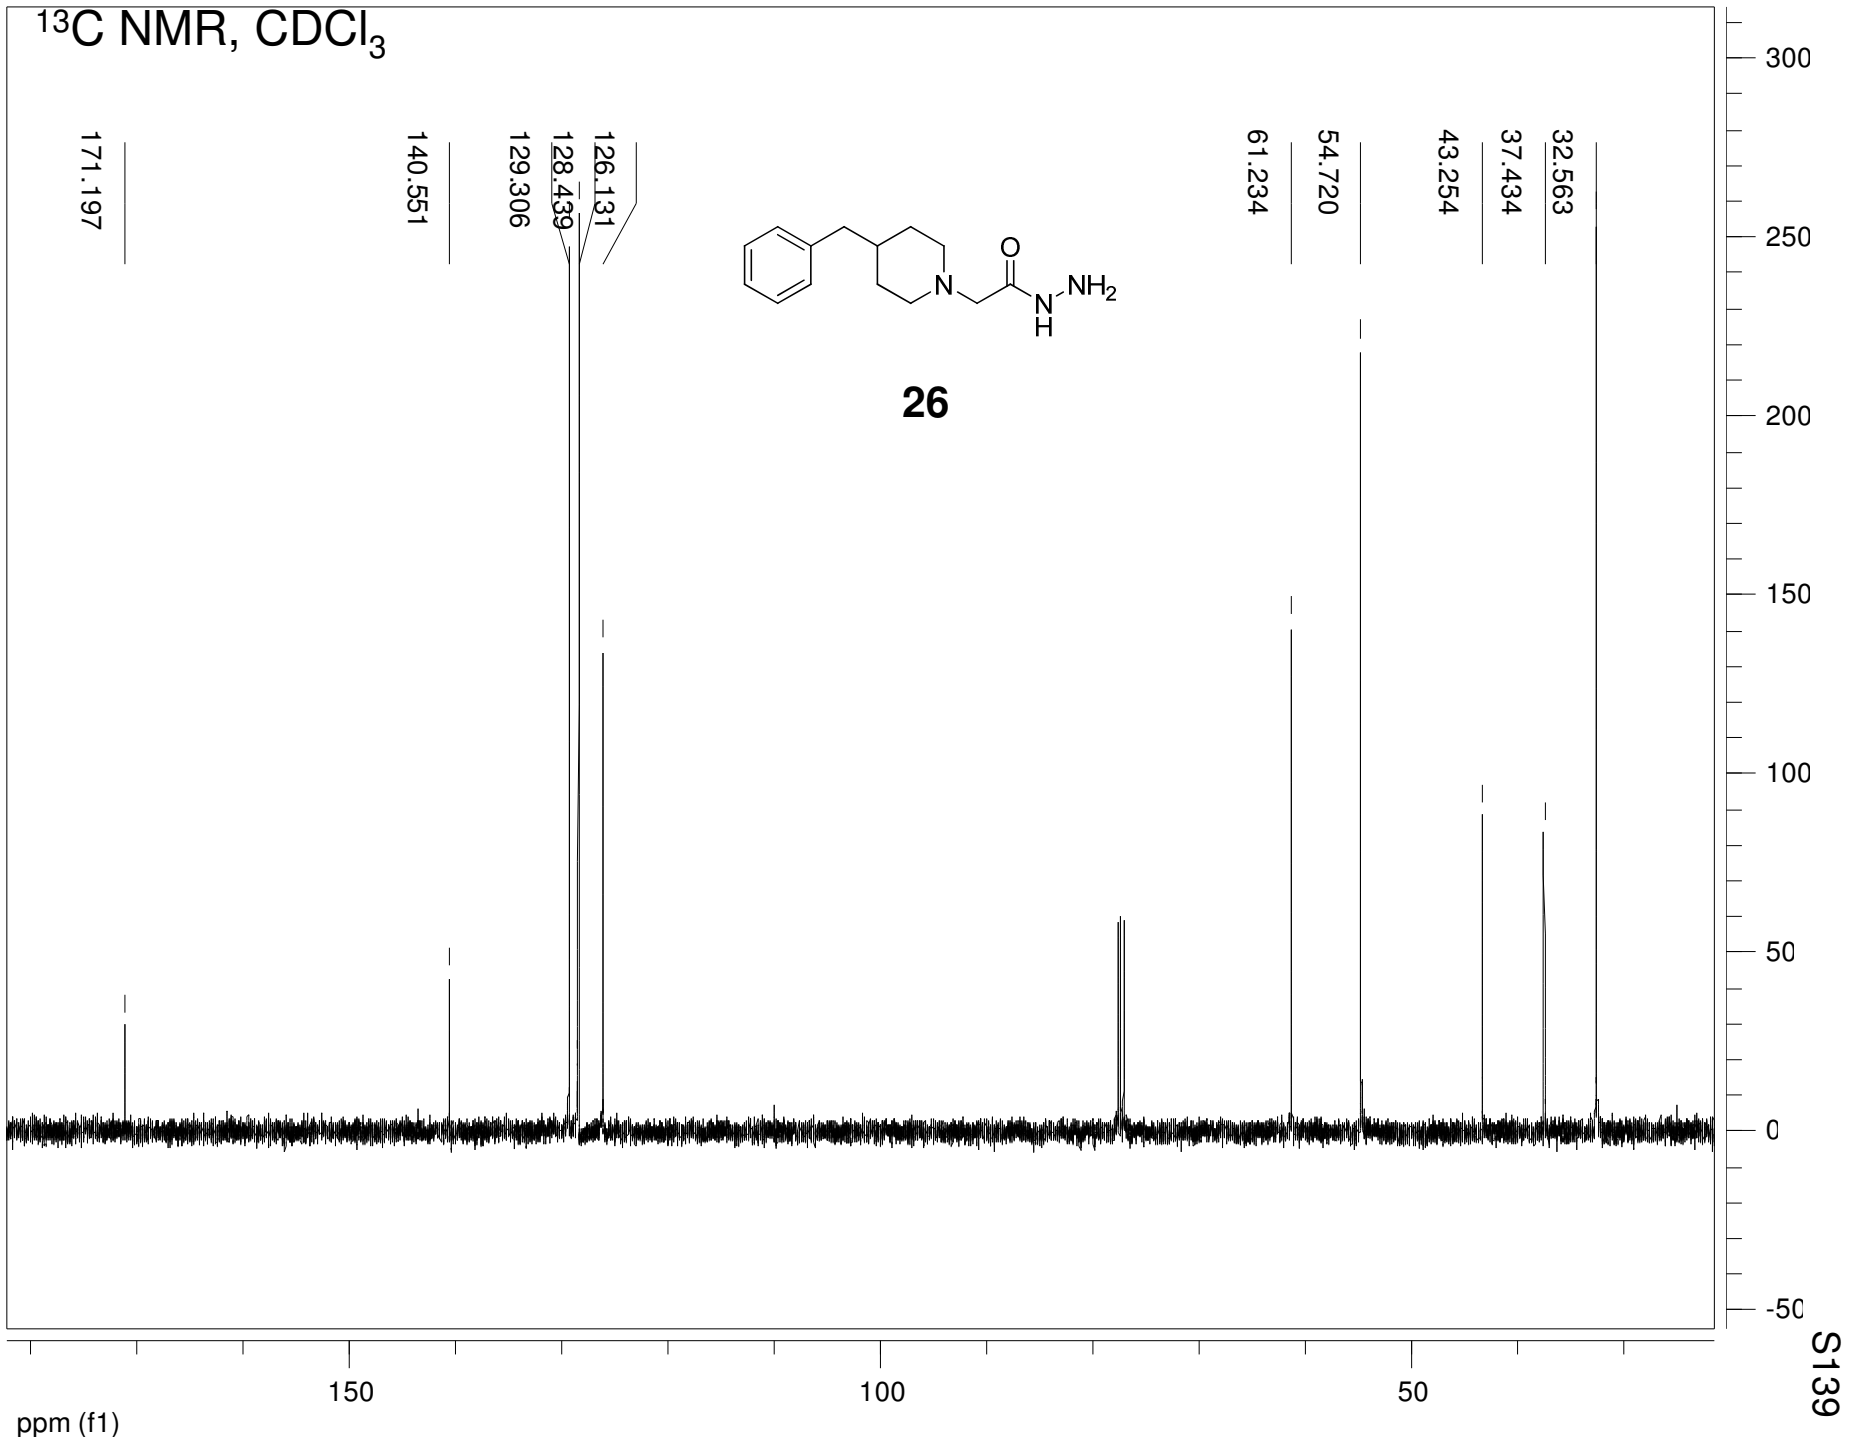

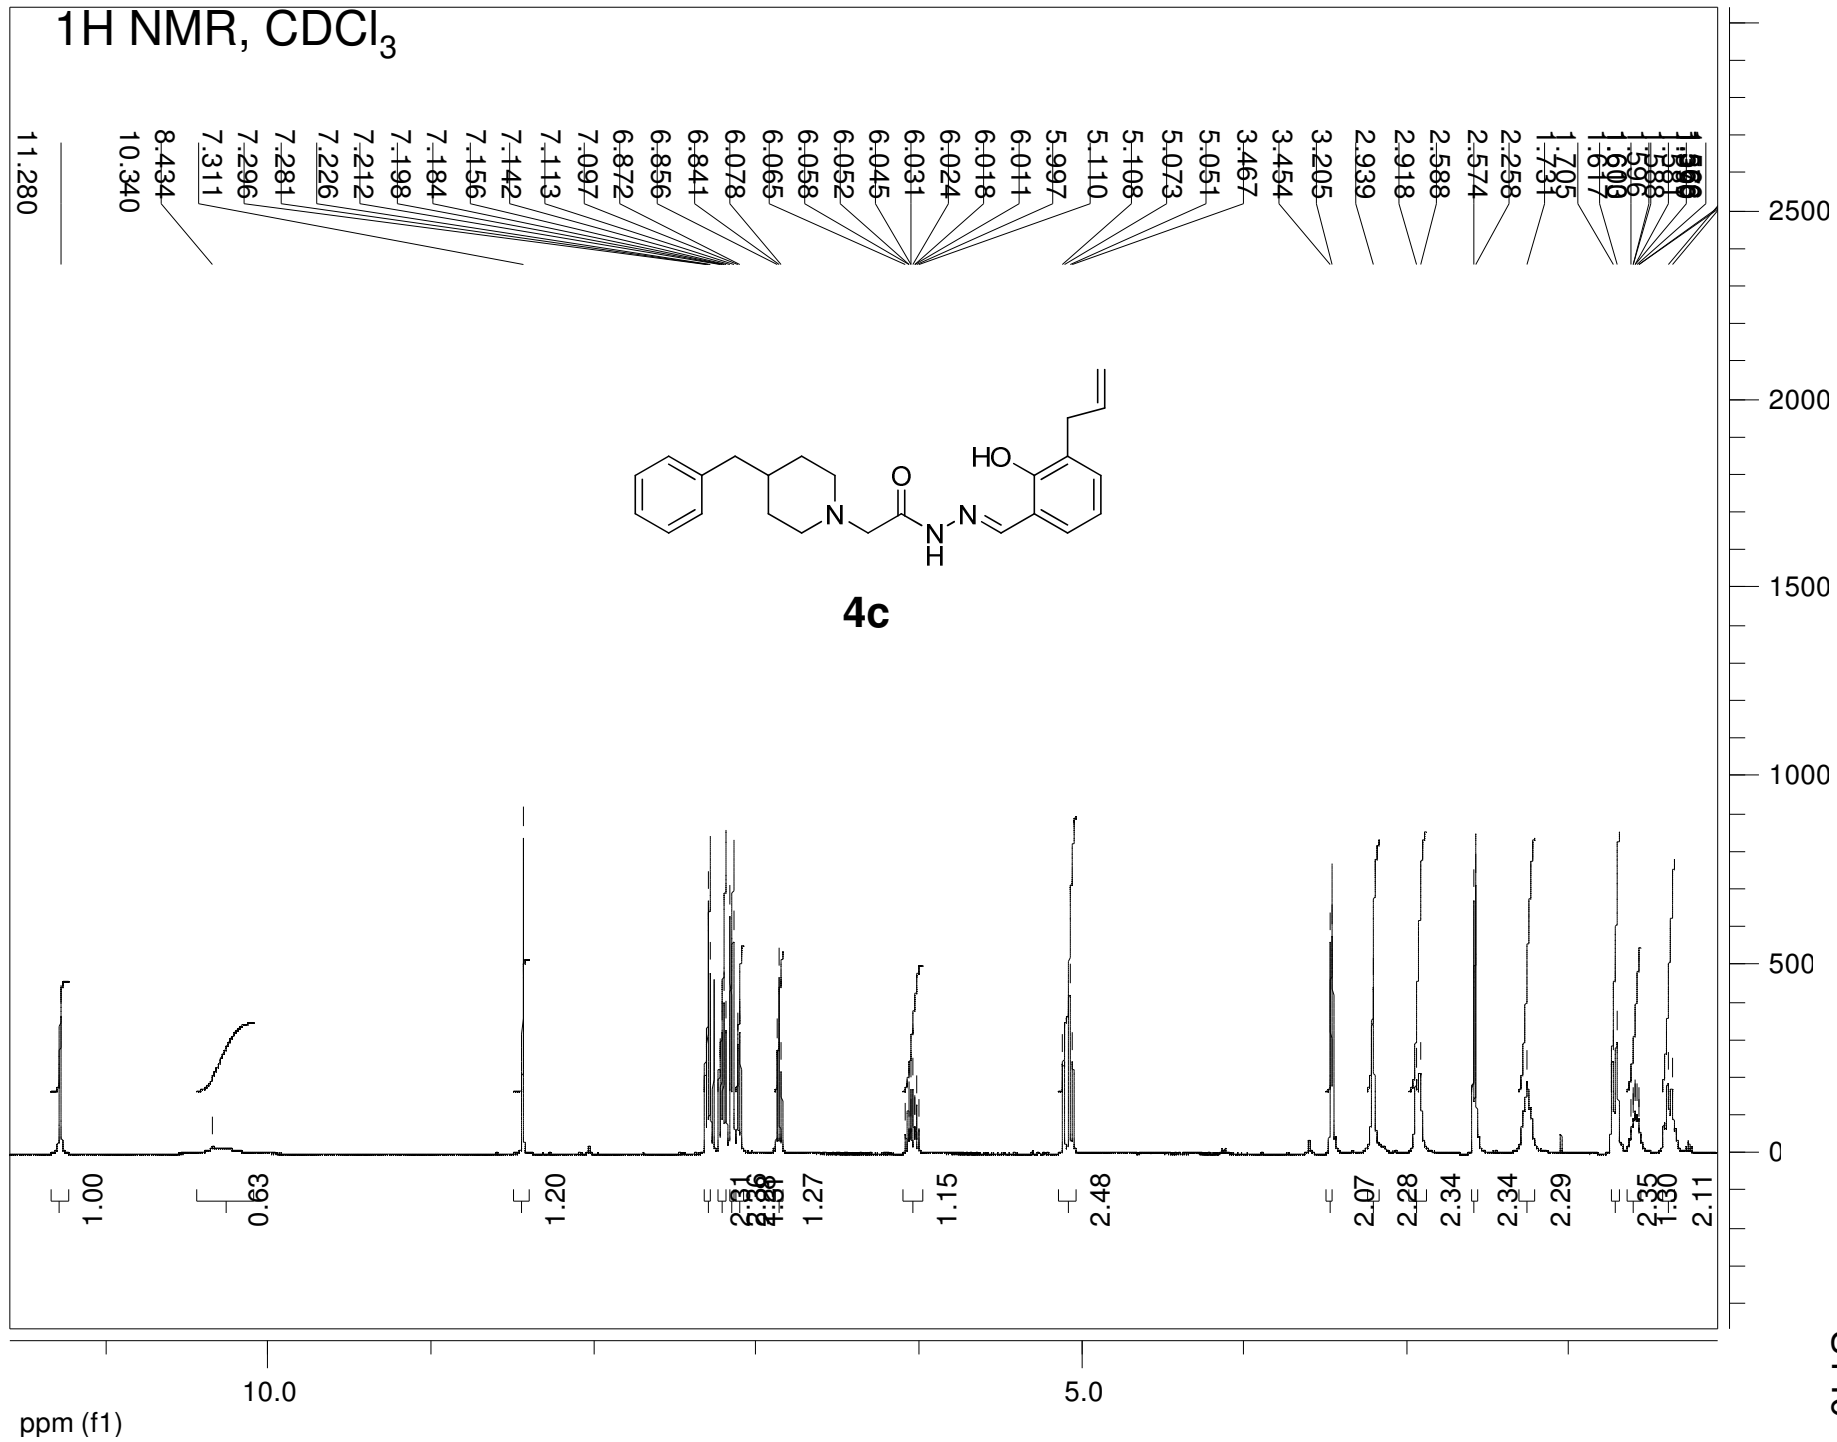



<sup>13</sup>C NMR, CDCl<sub>3</sub>

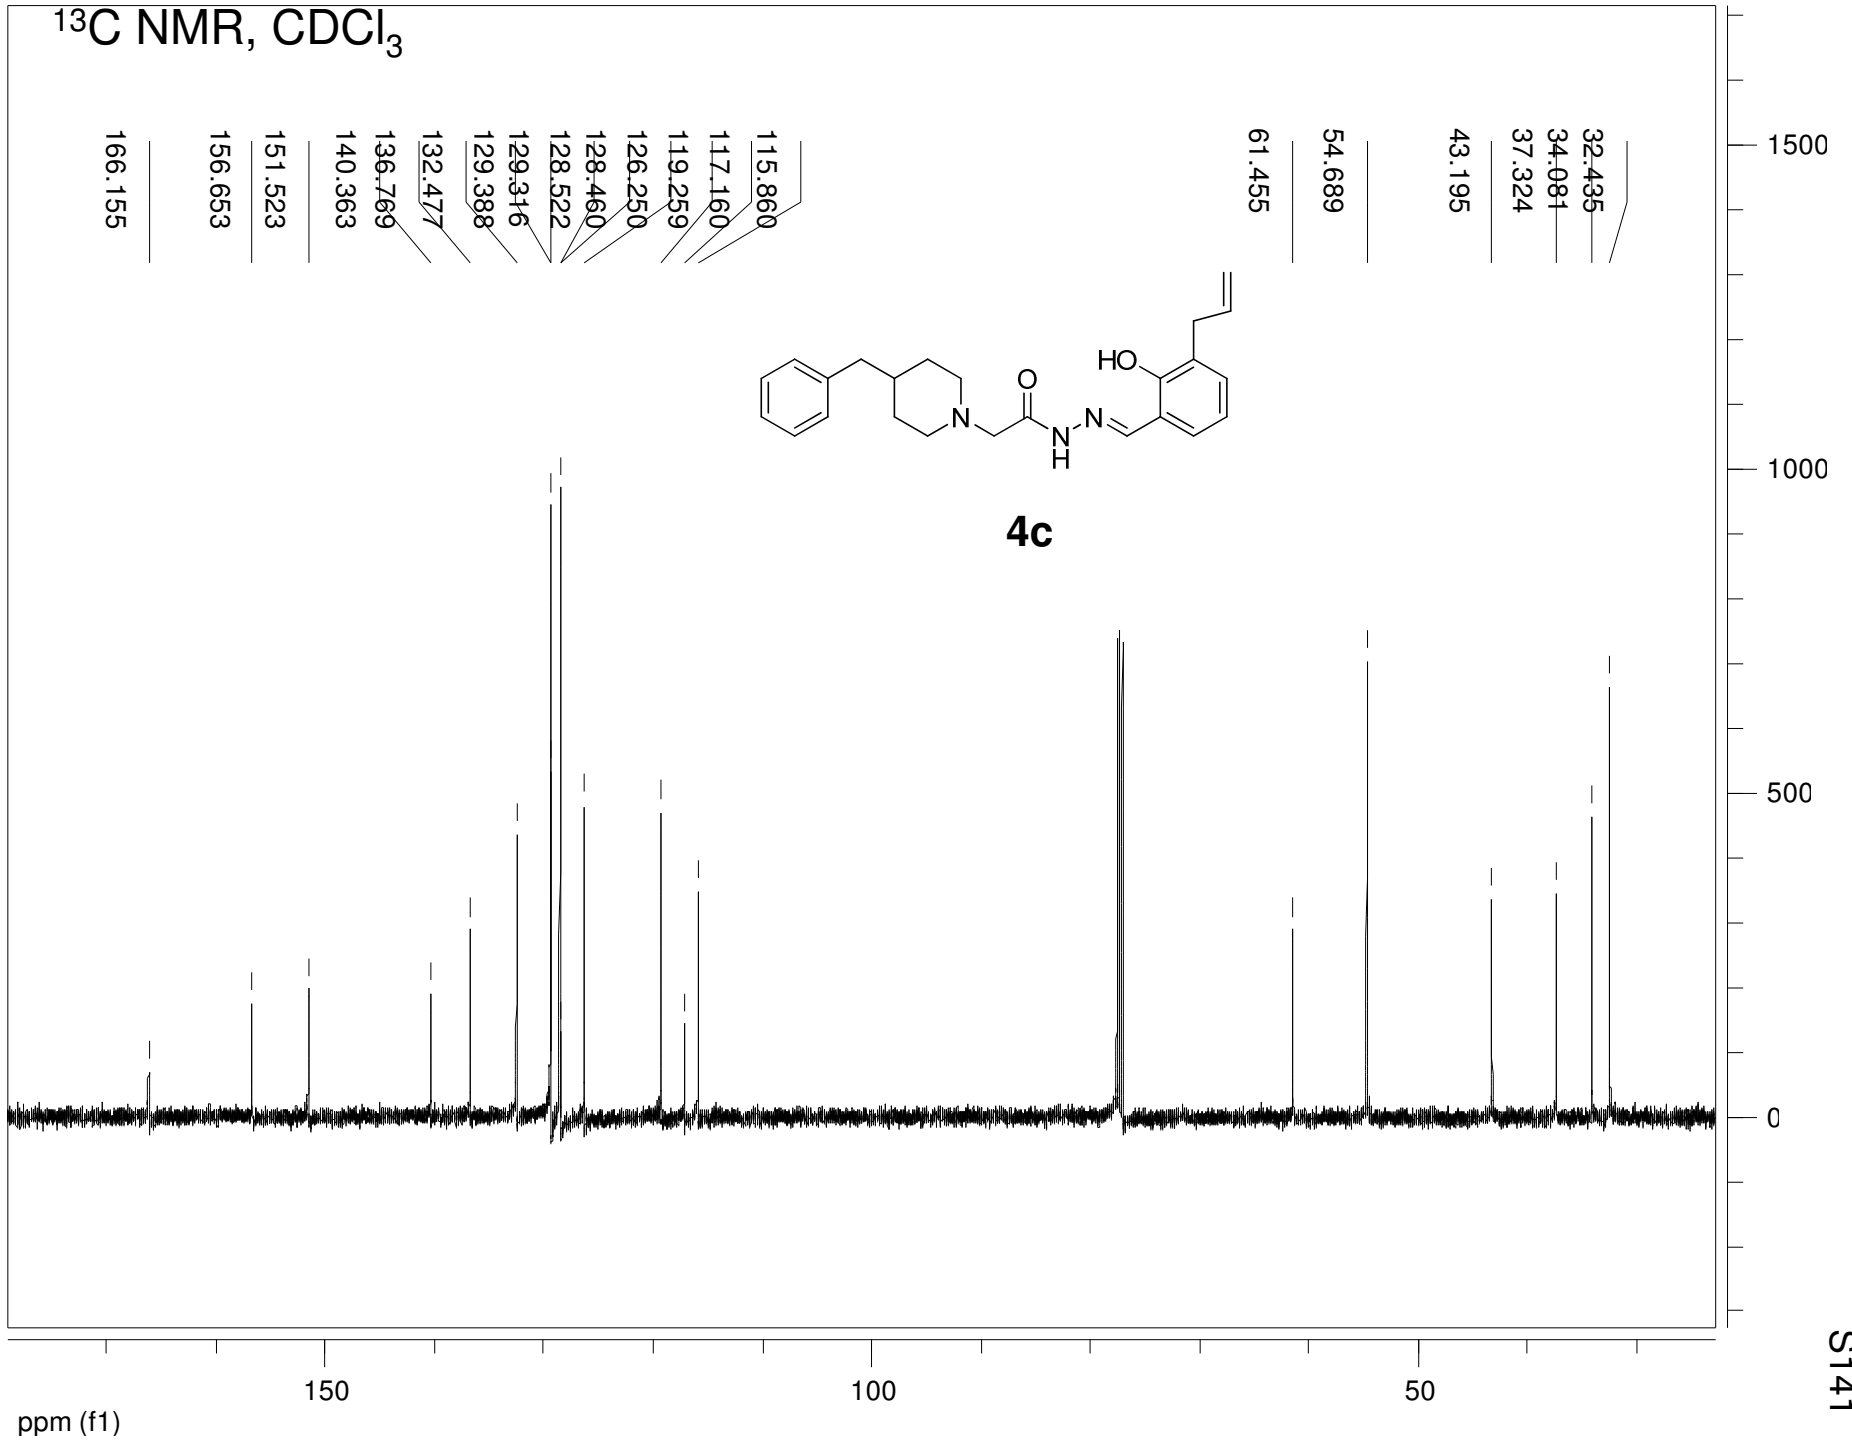

# HPLC

\* RUN # 439      JAN 8, 2008 14:59:14  
 START

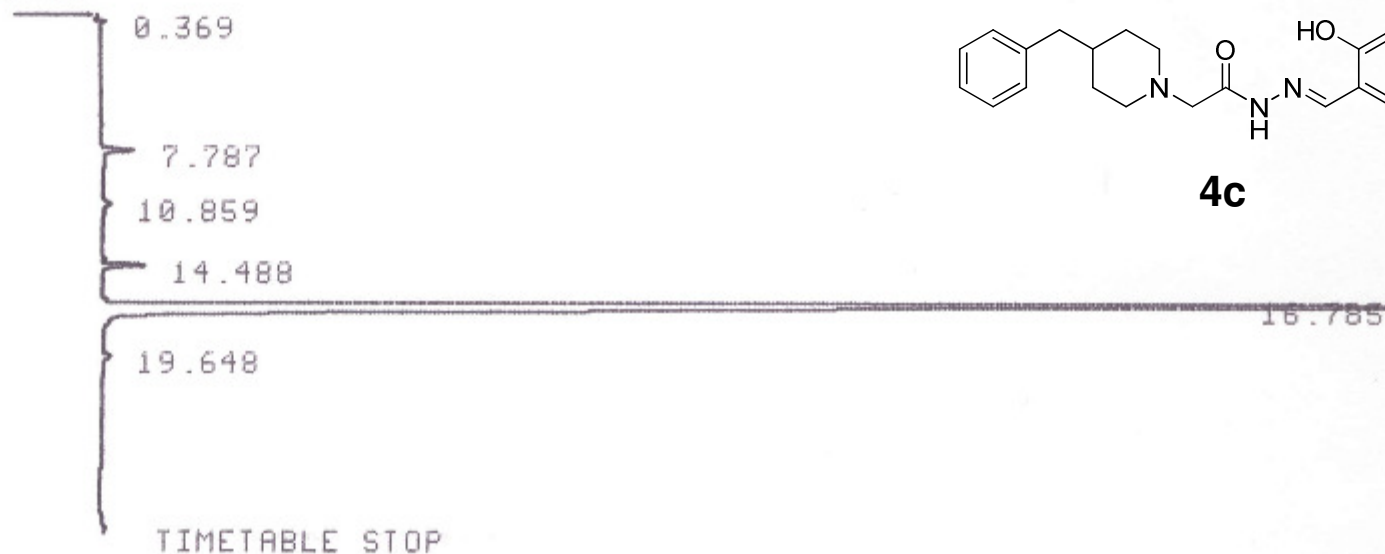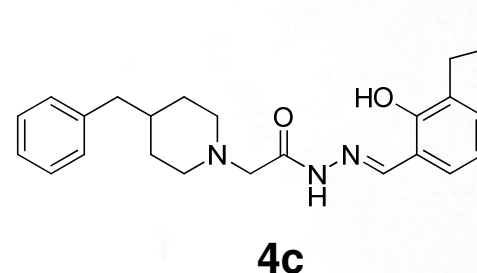

RUN# 439      JAN 8, 2008 14:59:14

| RT     | AREA     | TYPE | WIDTH | AREA%    |
|--------|----------|------|-------|----------|
| 0.369  | 107224   | BB   | .113  | .19915   |
| 7.787  | 669769   | BB   | .228  | 1.24396  |
| 10.859 | 86109    | BB   | .158  | .15993   |
| 14.488 | 822035   | PB   | .197  | 1.52676  |
| 16.785 | 51881440 | BB   | .308  | 96.35933 |
| 19.648 | 275074   | PU   | .320  | .51089   |

TOTAL AREA=5.3842E+07  
 MUL FACTOR=1.0000E+00

1H NMR, CDCl<sub>3</sub>

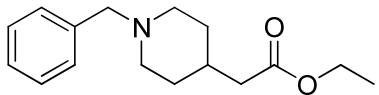

**44**

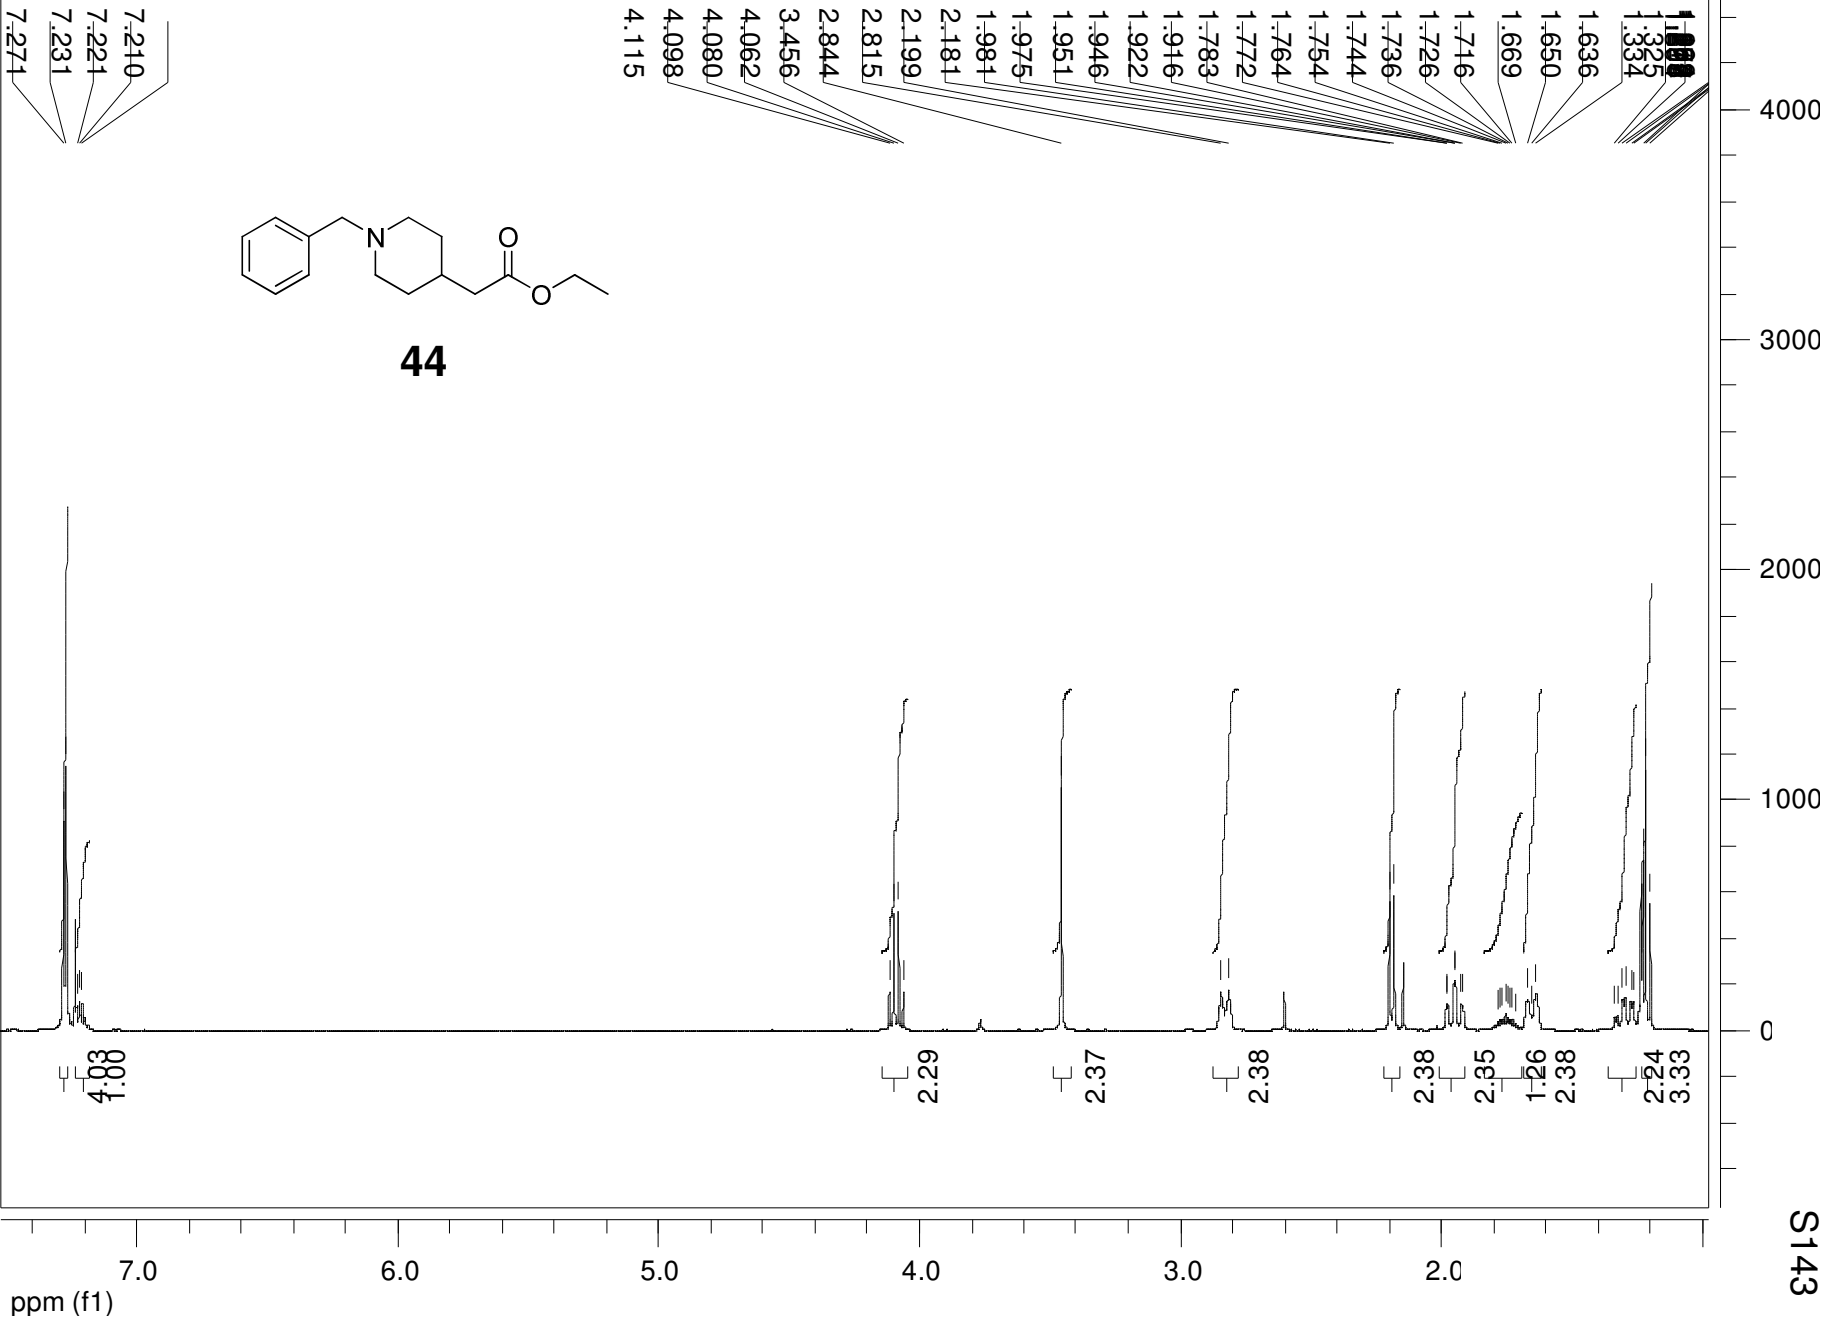

<sup>13</sup>C NMR, CDCl<sub>3</sub>

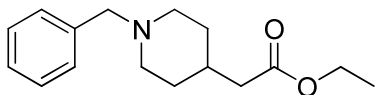

**44**

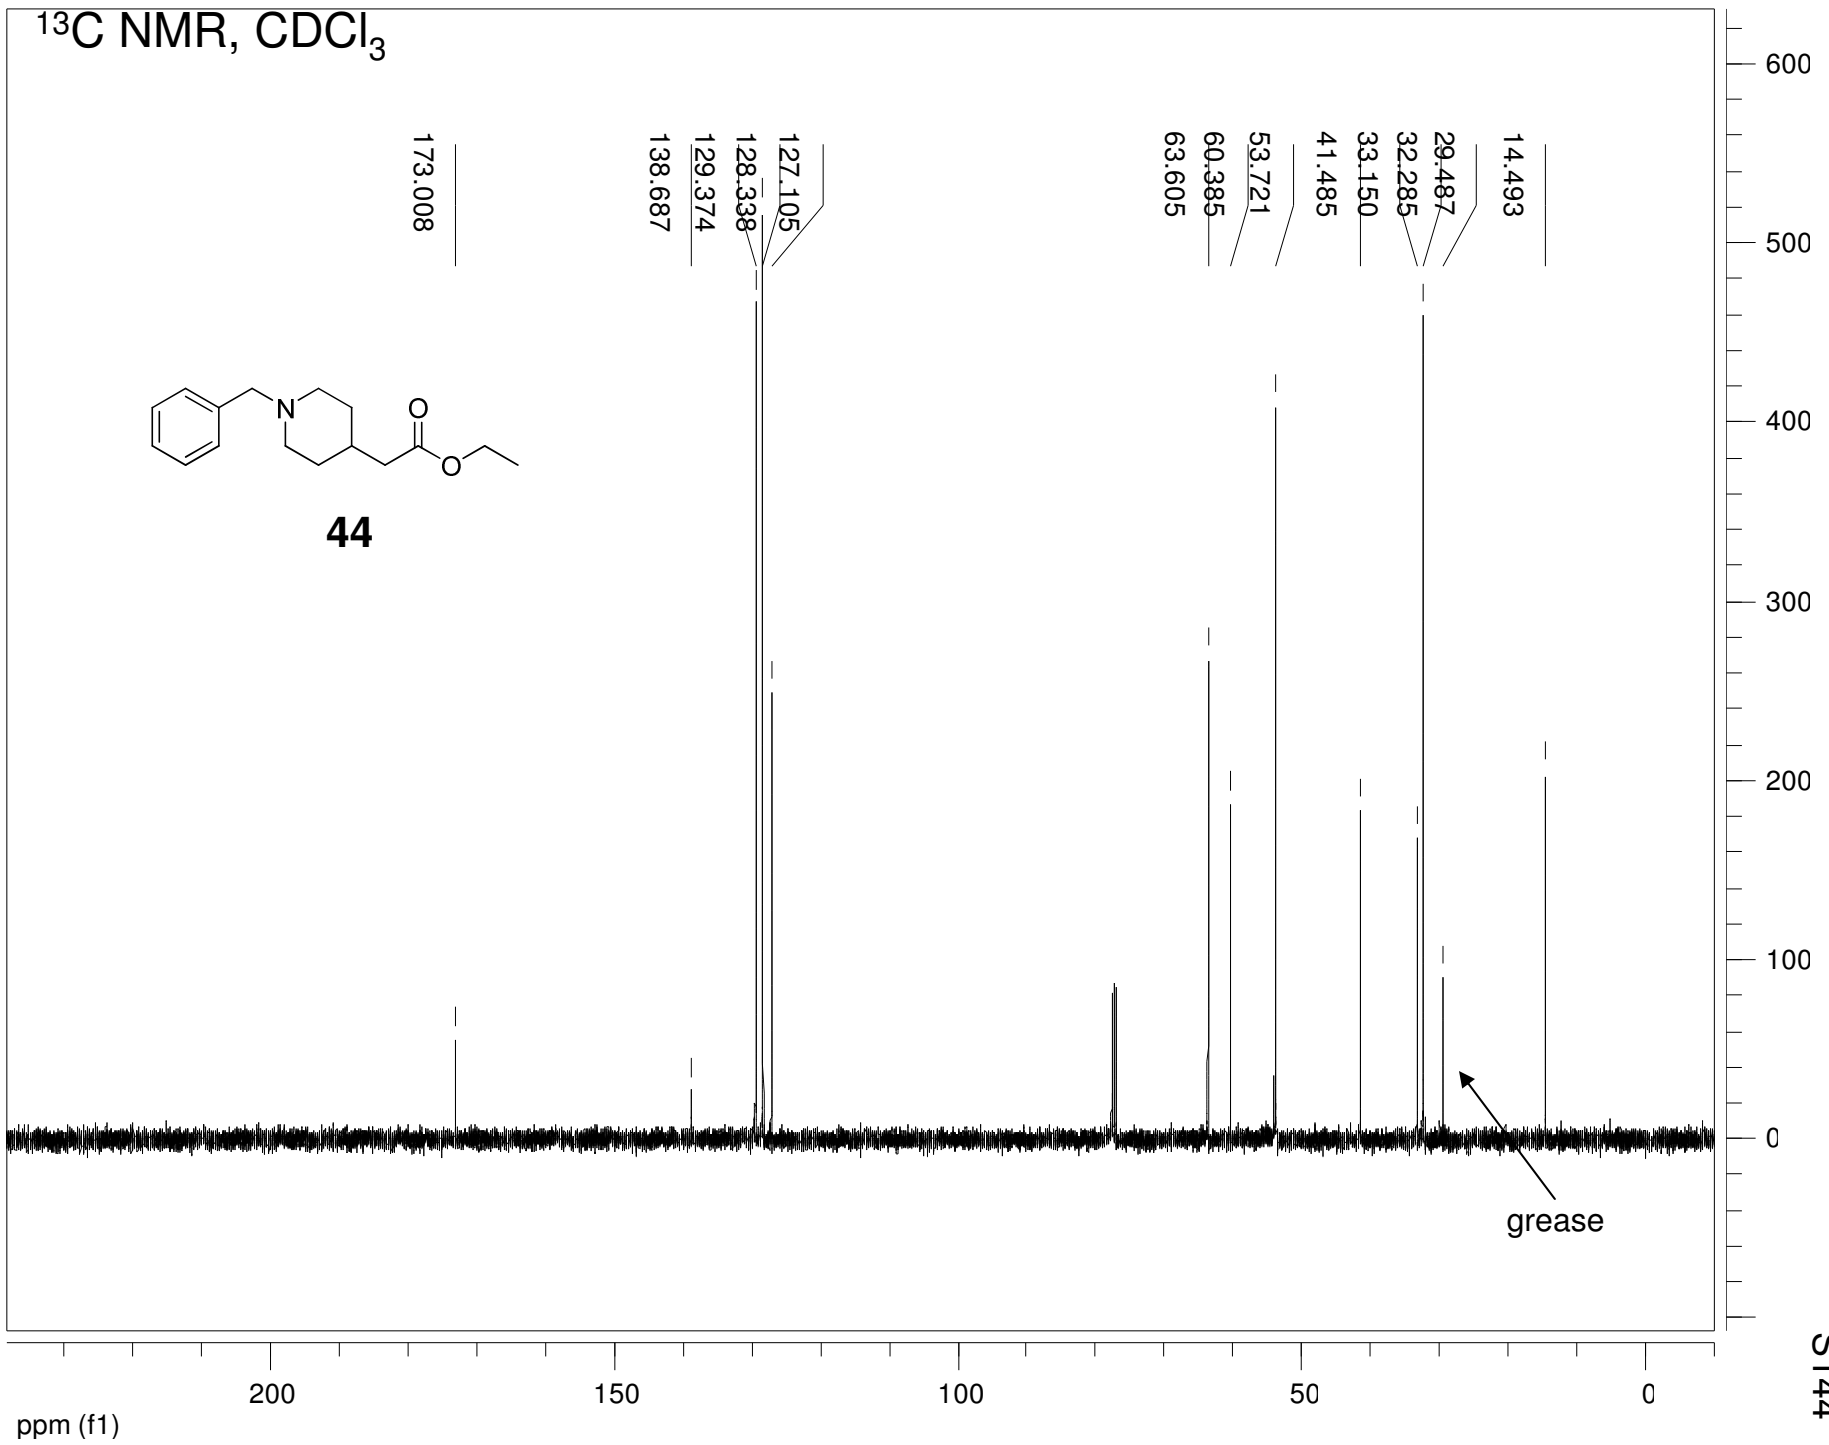

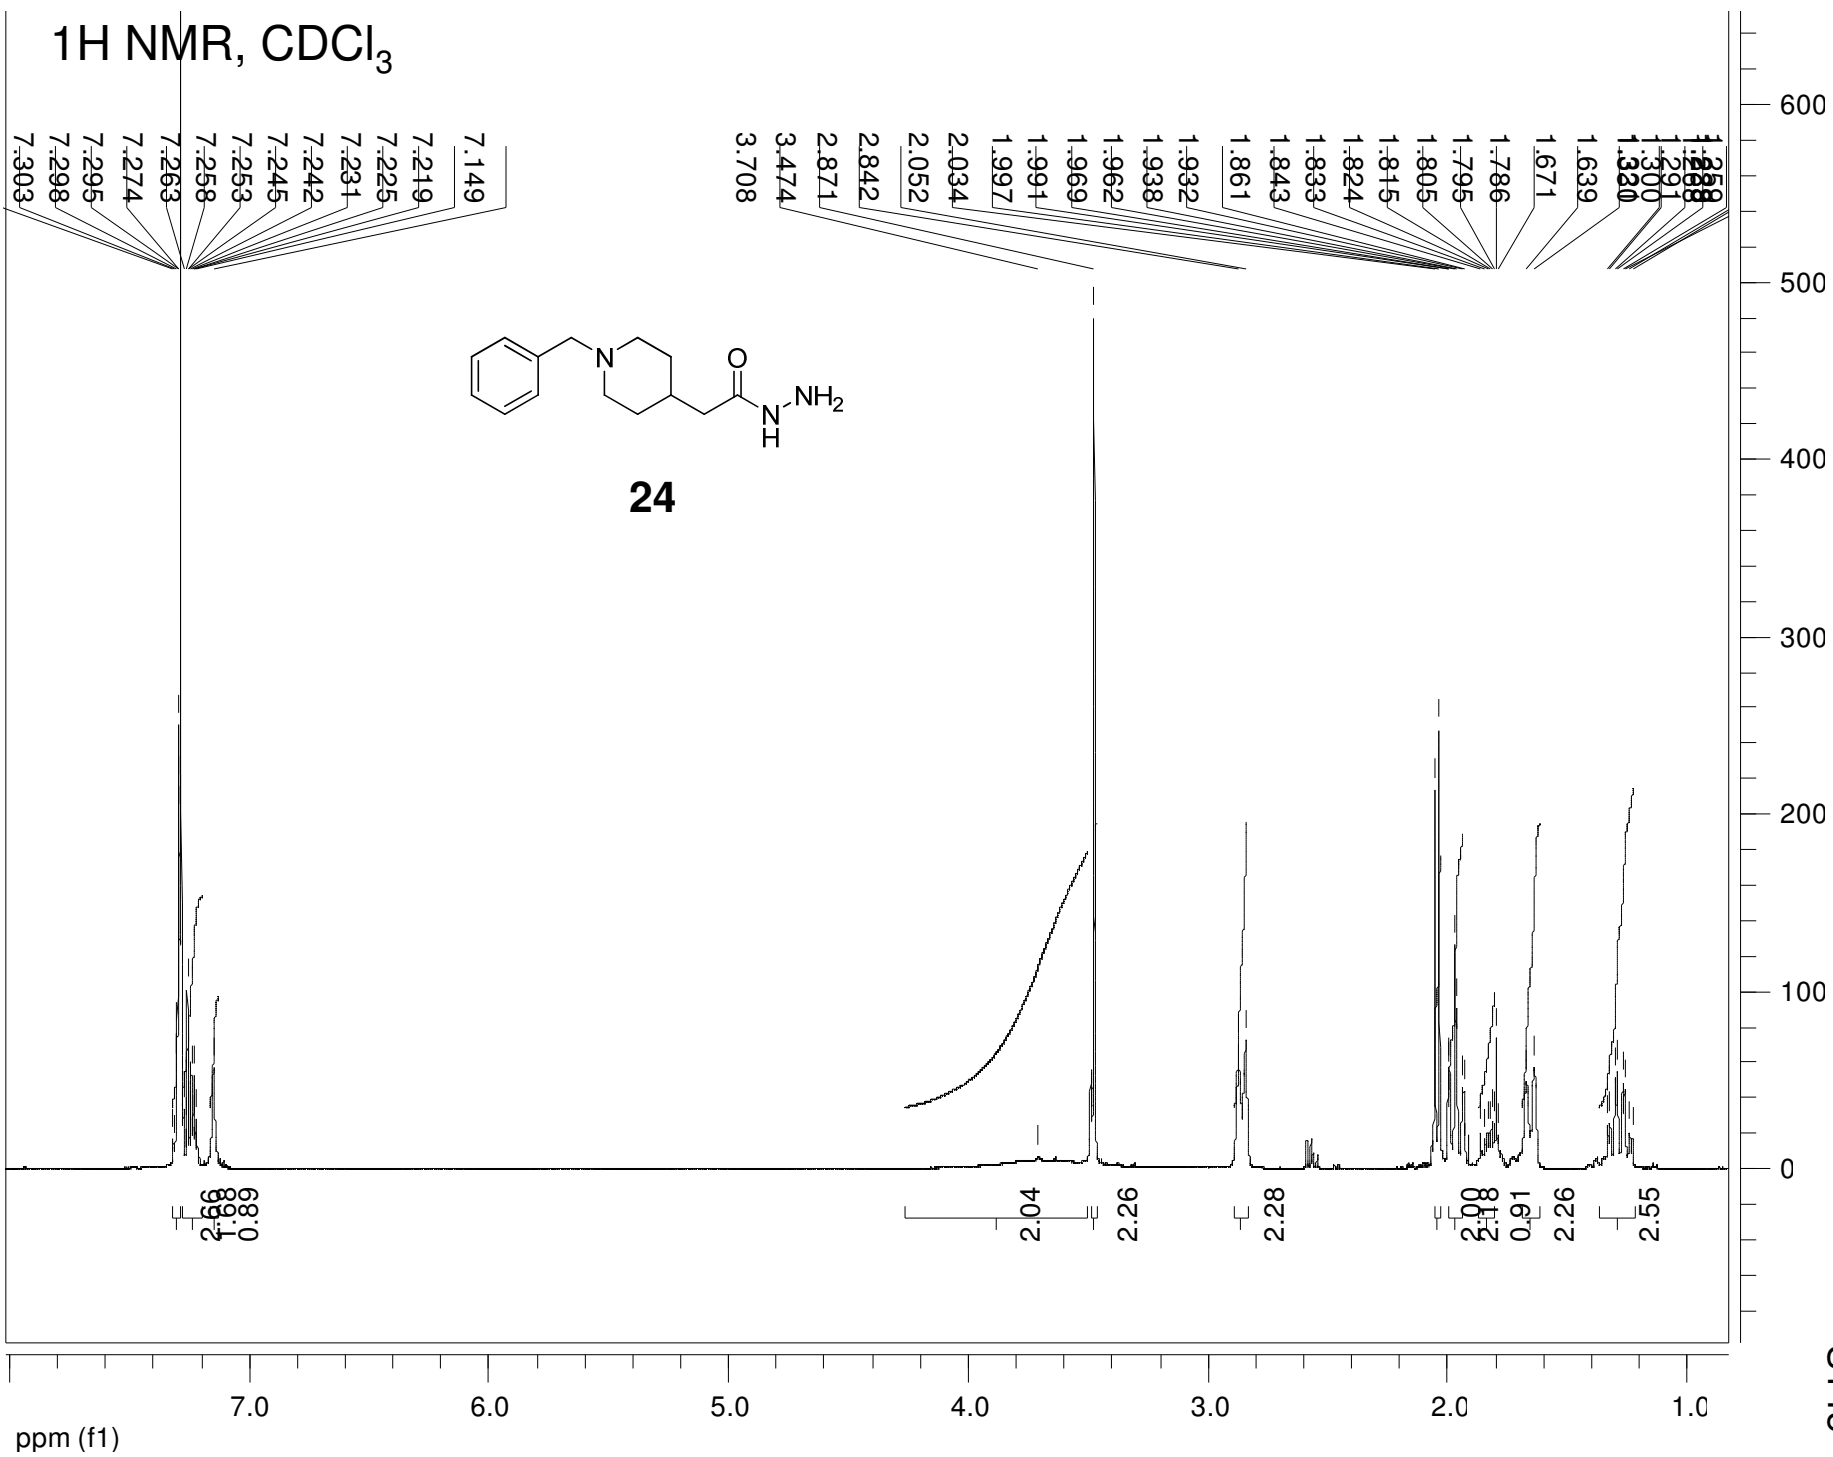

<sup>13</sup>C NMR, CDCl<sub>3</sub>

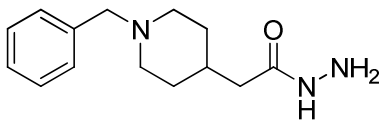

**24**

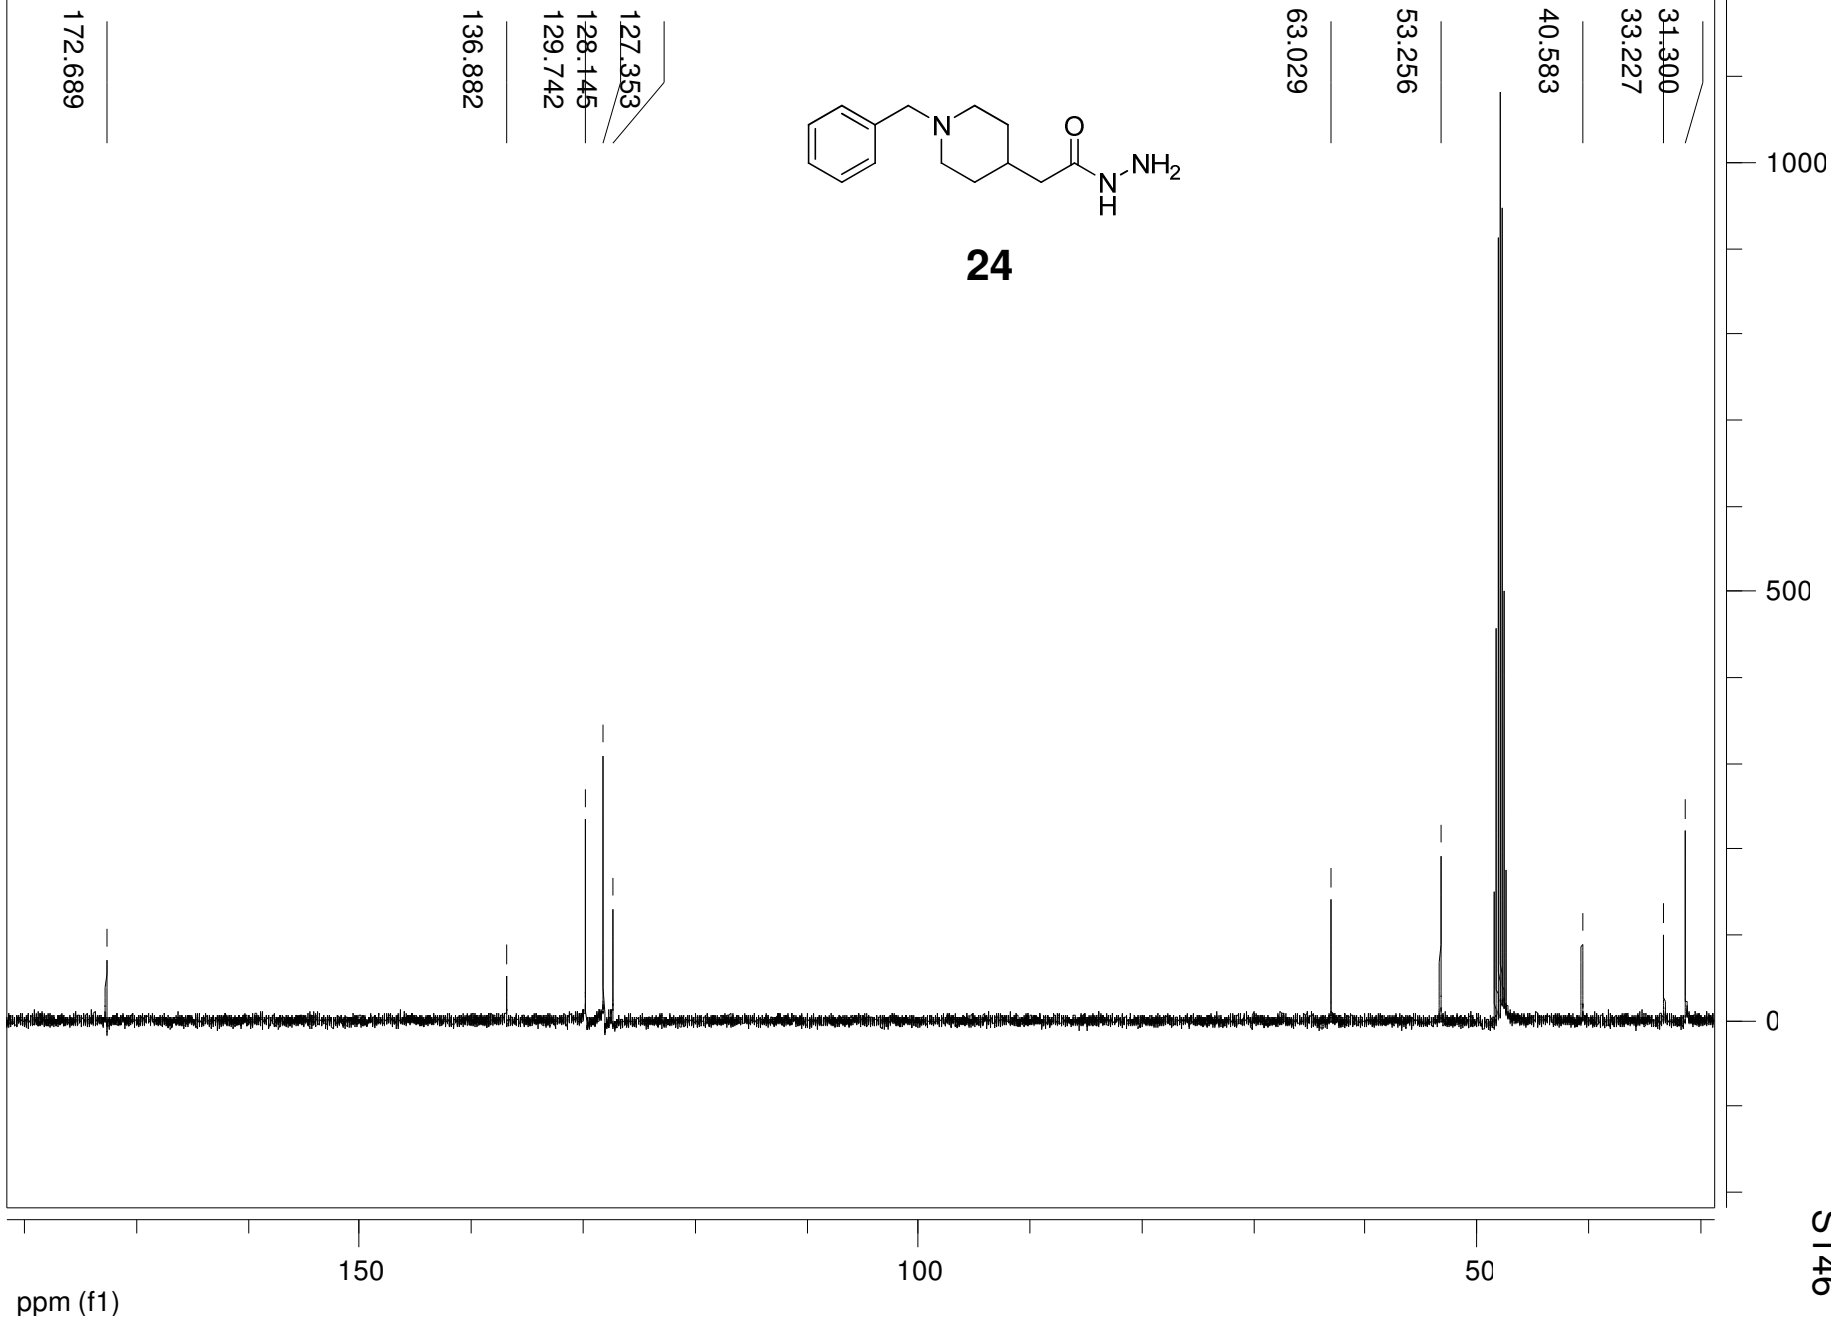

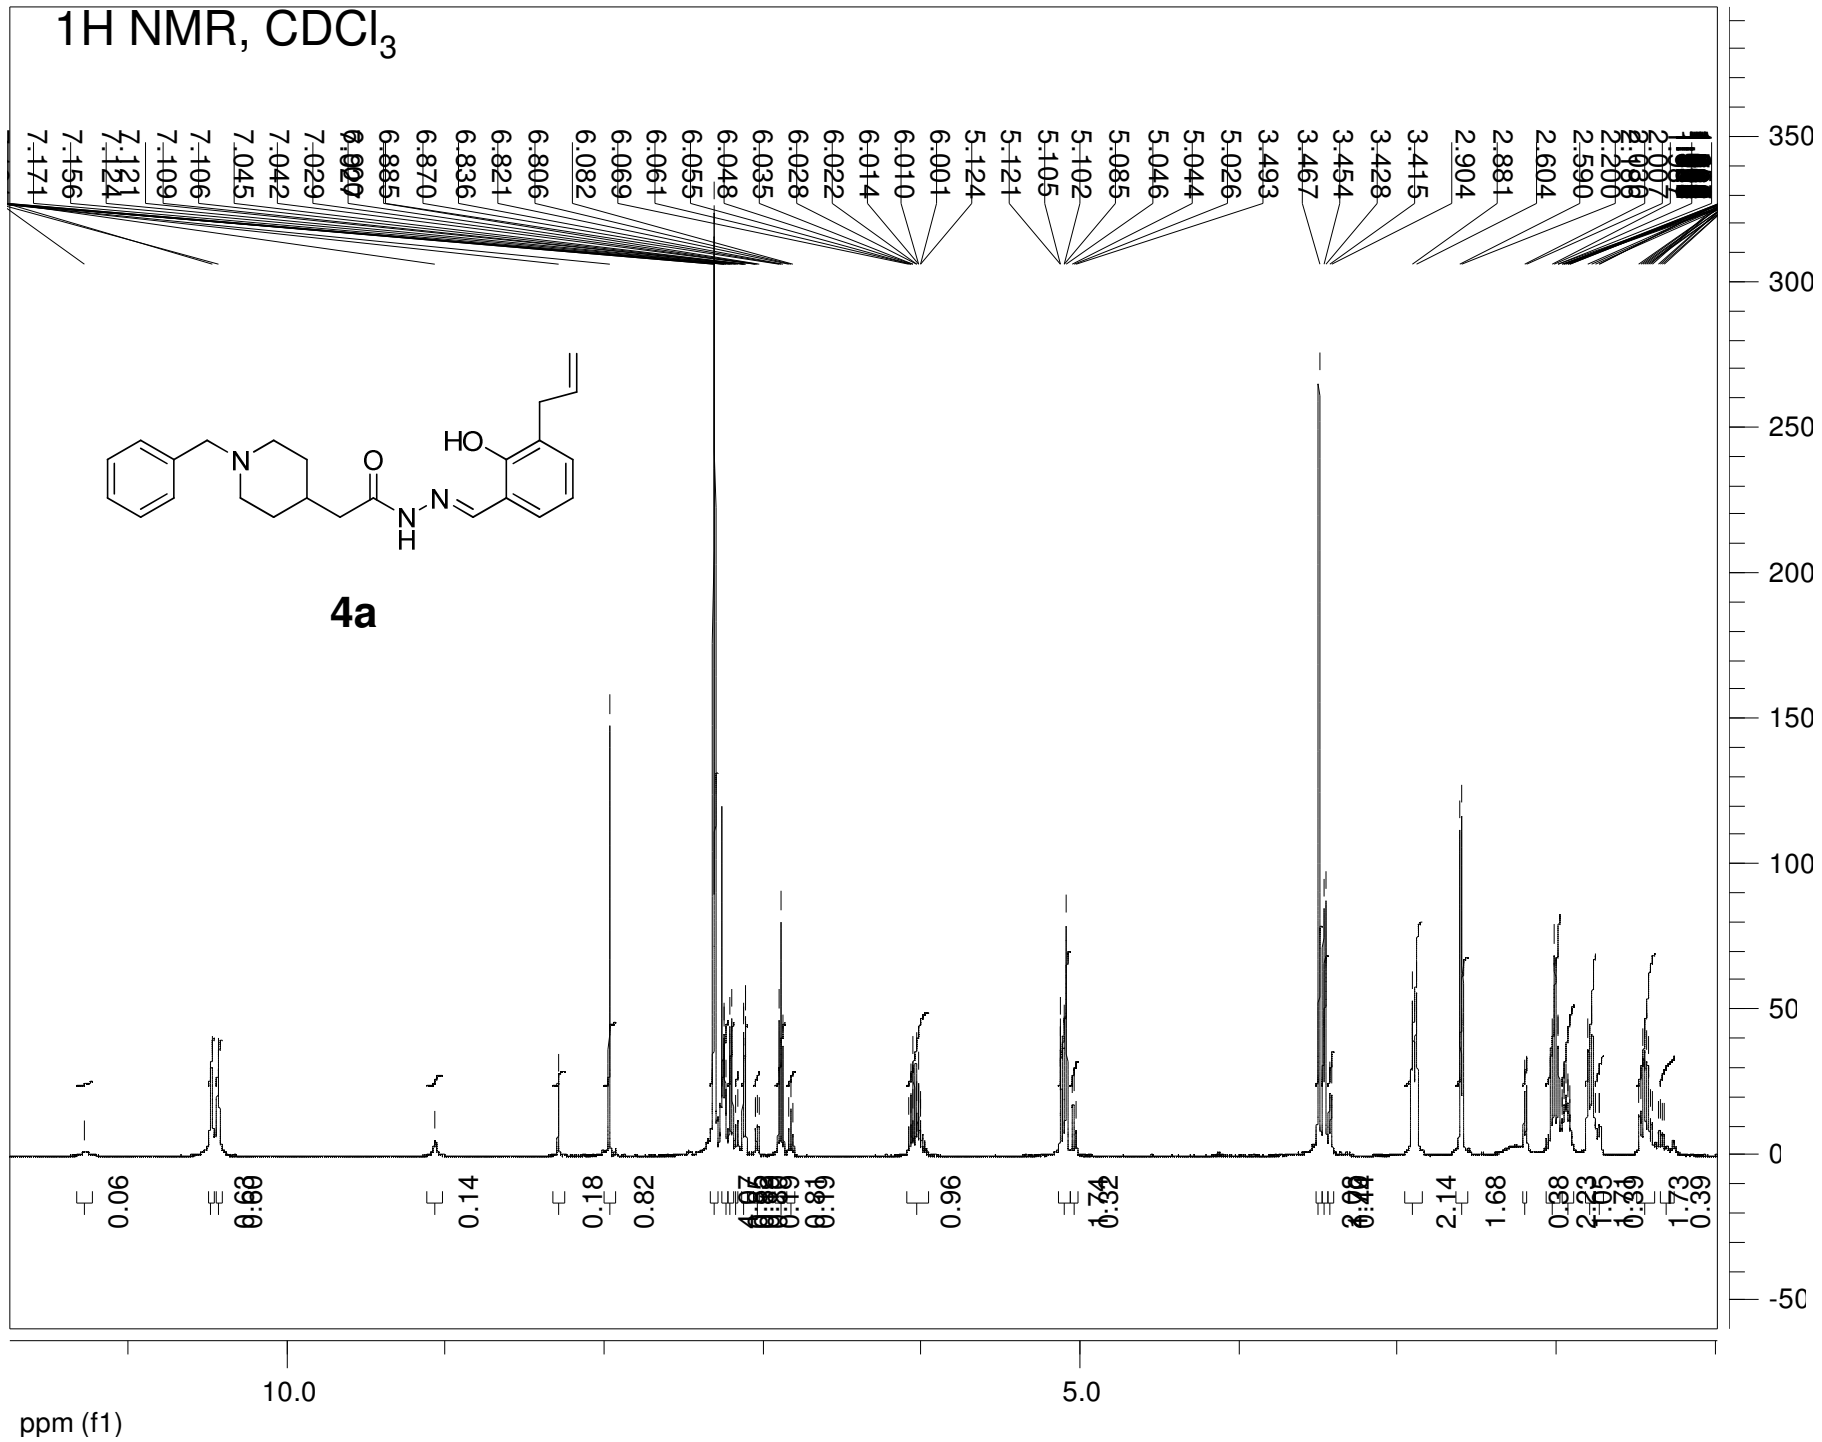

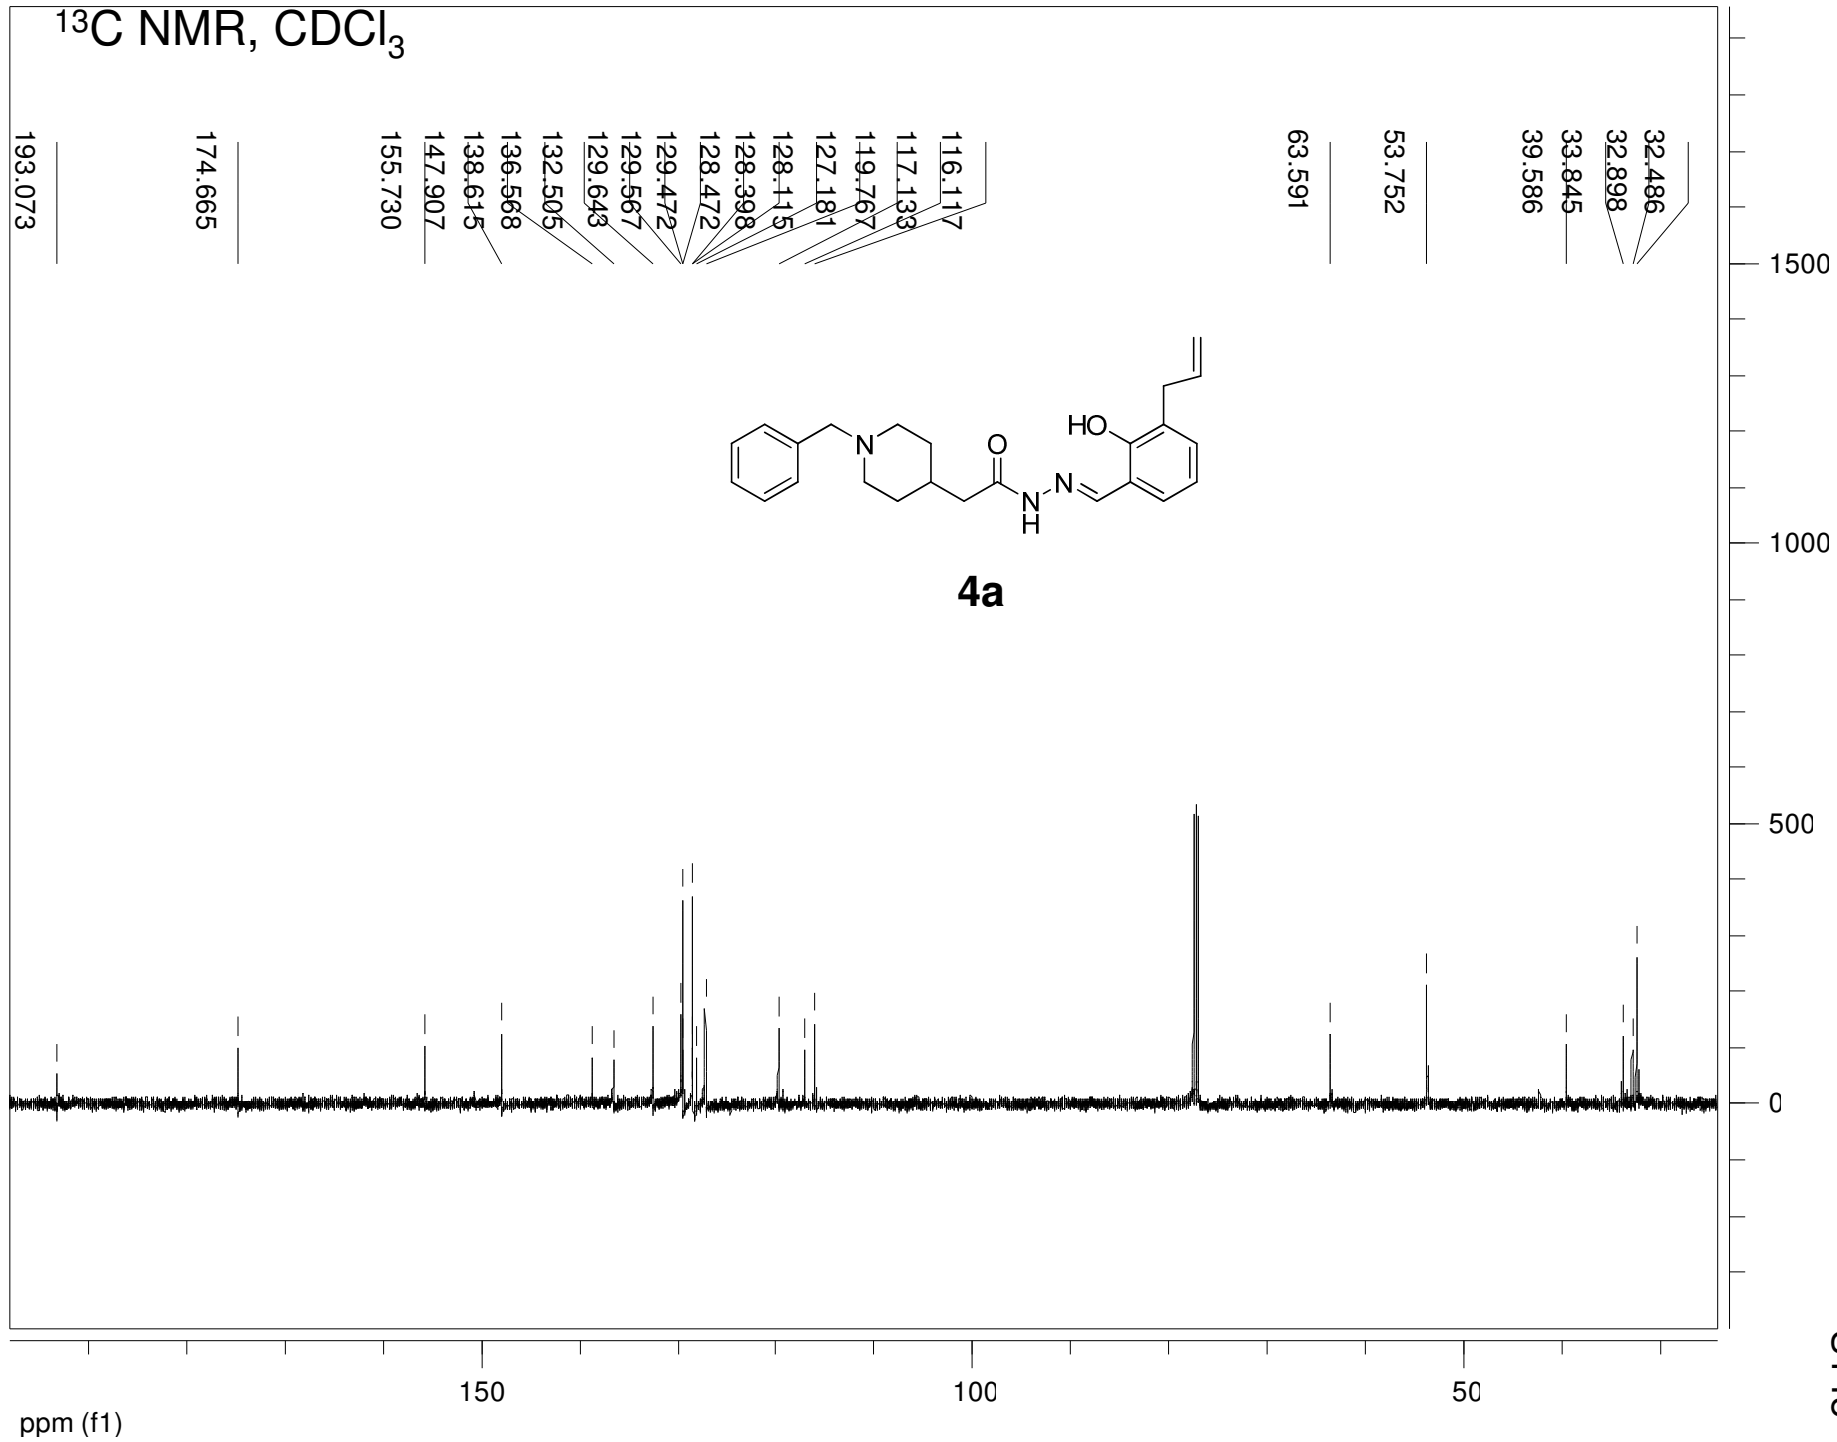



# HPLC

\* RUN # 447      JAN 8, 2008 20:46:58  
START

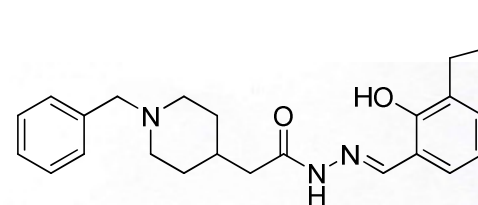

**4a**

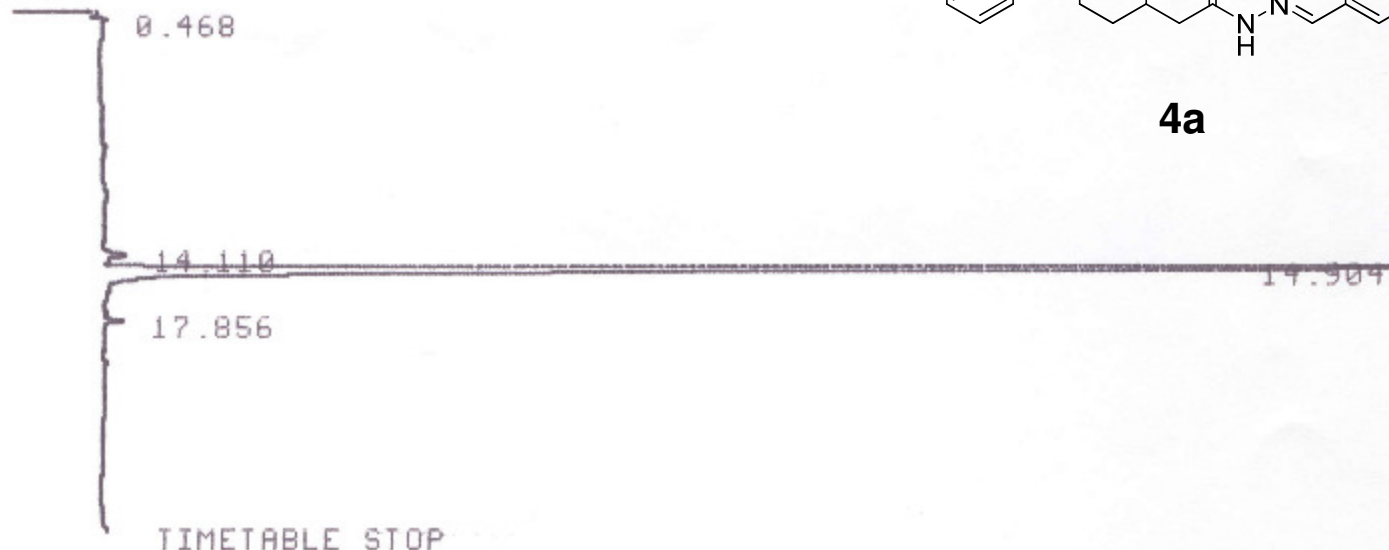

RUN# 447      JAN 8, 2008 20:46:58

AREA%

| RT     | AREA     | TYPE | WIDTH | AREA%    |
|--------|----------|------|-------|----------|
| .468   | 353266   | BB   | .241  | .82683   |
| 14.110 | 656174   | BP   | .319  | 1.53580  |
| 14.904 | 41376064 | PB   | .293  | 96.84227 |
| 17.856 | 339703   | BB   | .186  | .79509   |

TOTAL AREA=4.2725E+07  
MUL FACTOR=1.0000E+00

1H NMR, CDCl<sub>3</sub>

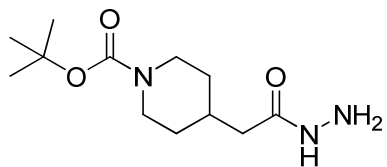

25

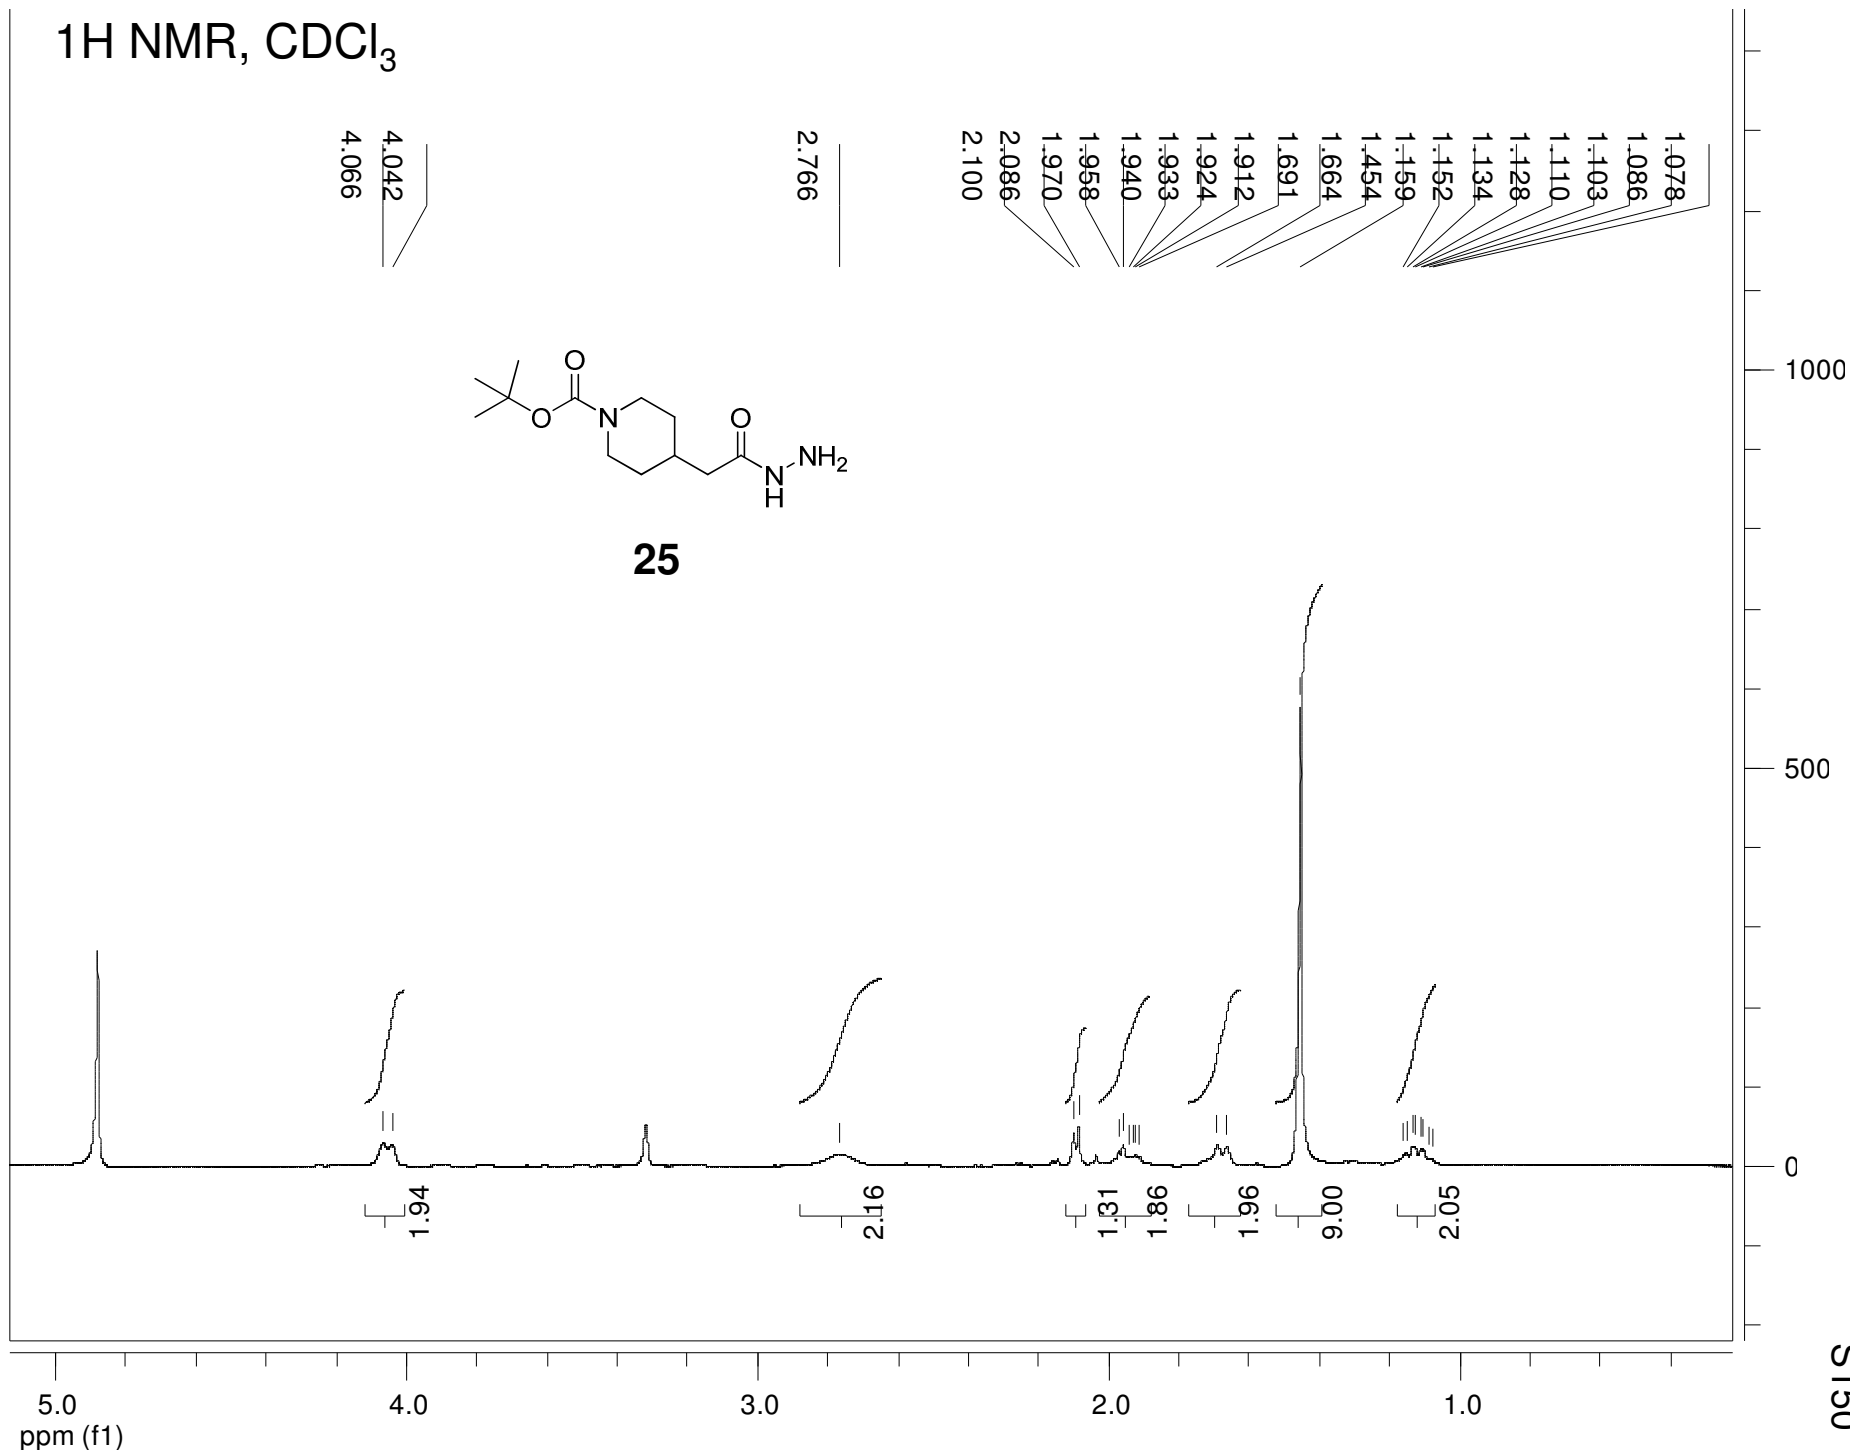

<sup>13</sup>C NMR, CDCl<sub>3</sub>

155.296

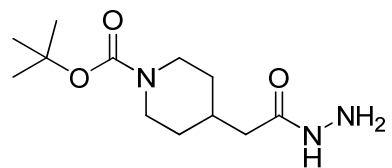

**25**

79.763

40.880

40.544

33.551

31.694

27.516

17.224

ppm (f1)

150

100

50

4000

3000

2000

1000

0

S151



<sup>13</sup>C NMR, CDCl<sub>3</sub>

28.675  
32.281  
32.910  
33.812  
39.489  
79.713  
79.860  
115.866  
116.104  
117.164  
119.202  
119.832  
128.073  
128.432  
129.227  
129.690  
132.367  
132.584  
136.517  
136.704  
148.302  
150.554  
155.095  
155.729  
156.572  
168.055  
174.306

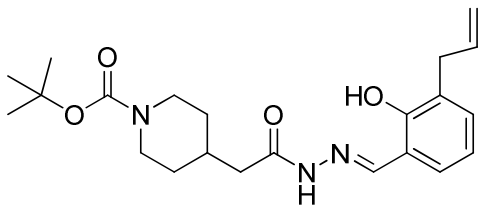

**4b**

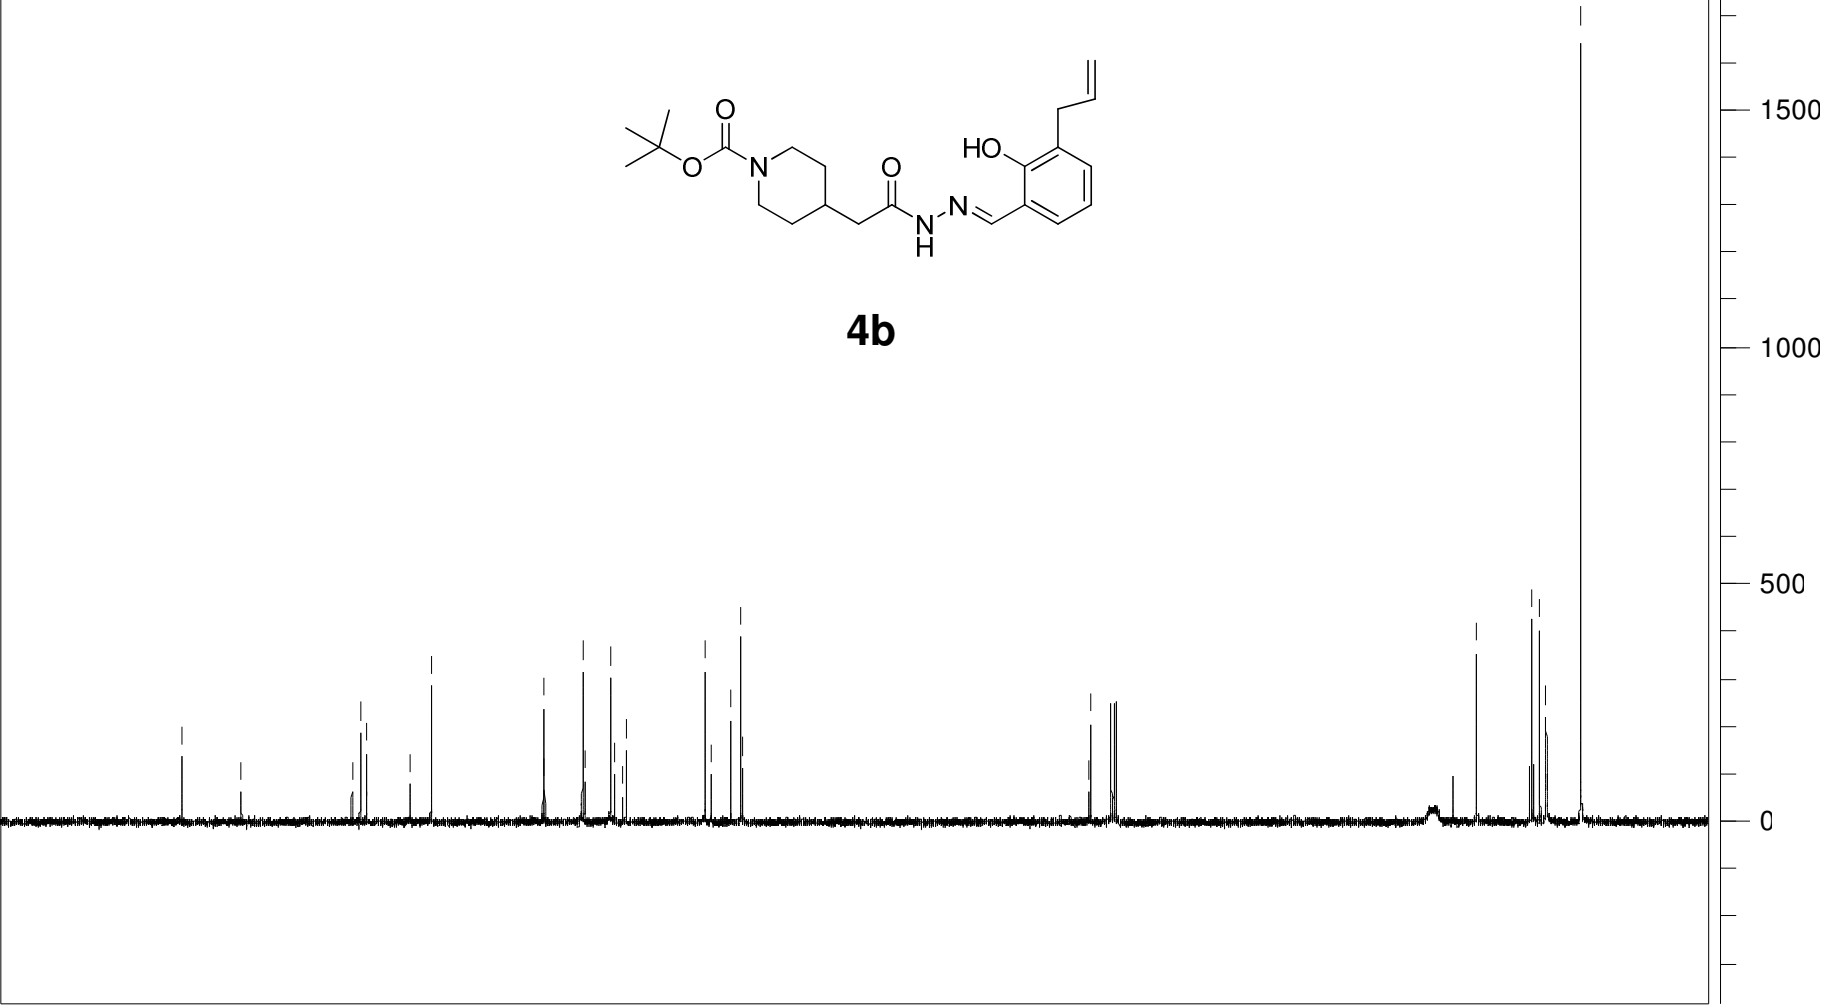

ppm (f1)

150

100

50

S153

# HPLC

Data File D:\HPCHEM\DATA\2009\DH\DH\_RT1.D  
 Sample Name: DH-RT1

```

=====
Acq. Operator   : DH                               Location  : P1-F-05
Acq. Instrument : EI Chupacabra                    Inj Volume: 10 µl
Injection Date  : 5/24/2009 11:37:49 PM
Acq. Method    : C:\HPCHEM\1\METHODS\DH.M
Last changed   : 5/24/2009 11:34:17 PM by DH
                (modified after loading)
Analysis Method: C:\HPCHEM\1\METHODS\DH.M
Last changed   : 5/24/2009 7:59:02 PM by TMA
=====
  
```

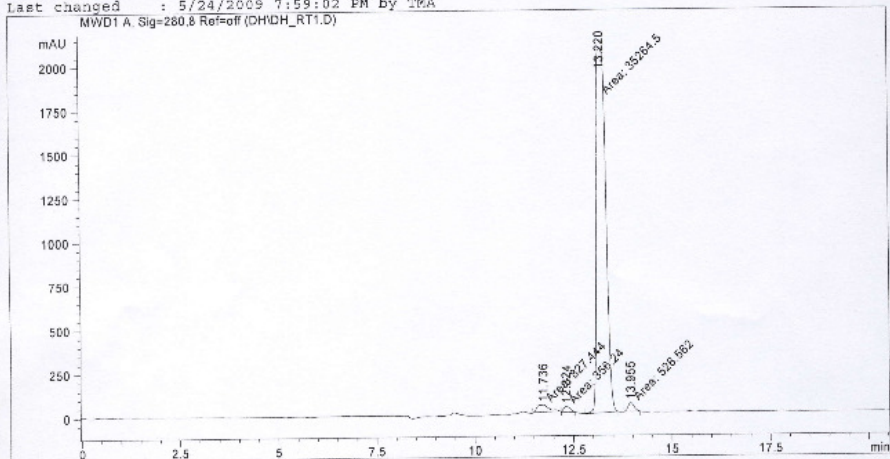

```

=====
Fraction Information
=====
Fraction collection off
=====
No Fractions found.
=====
  
```

```

=====
Area Percent Report
=====
  
```

```

Sorted By      : Signal
Multiplier     : 1.0000
Dilution       : 1.0000
Use Multiplier & Dilution Factor with ISTDs
  
```

Signal 1: MWD1 A, Sig=280.8 Ref=off

| Peak # | RetTime [min] | Type | Width [min] | Area [mAU*s] | Height [mAU] | Area %  |
|--------|---------------|------|-------------|--------------|--------------|---------|
| 1      | 11.736        | MM   | 0.3369      | 827.44397    | 40.93148     | 2.2377  |
| 2      | 12.324        | MM   | 0.1806      | 356.24042    | 32.88172     | 0.9634  |
| 3      | 13.220        | MM   | 0.2834      | 3.52645e4    | 2073.87036   | 95.3694 |
| 4      | 13.955        | MM   | 0.1756      | 528.56183    | 50.16971     | 1.4294  |

Totals : 3.69768e4 2197.85326

EI Chupacabra 5/25/2009 12:01:22 AM DH

Page 1 of 2

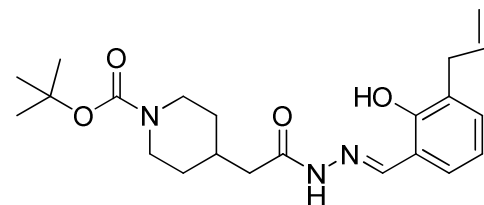

**4b**

1H NMR, CDCl<sub>3</sub>

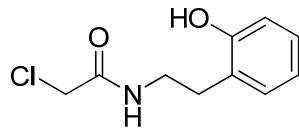

29

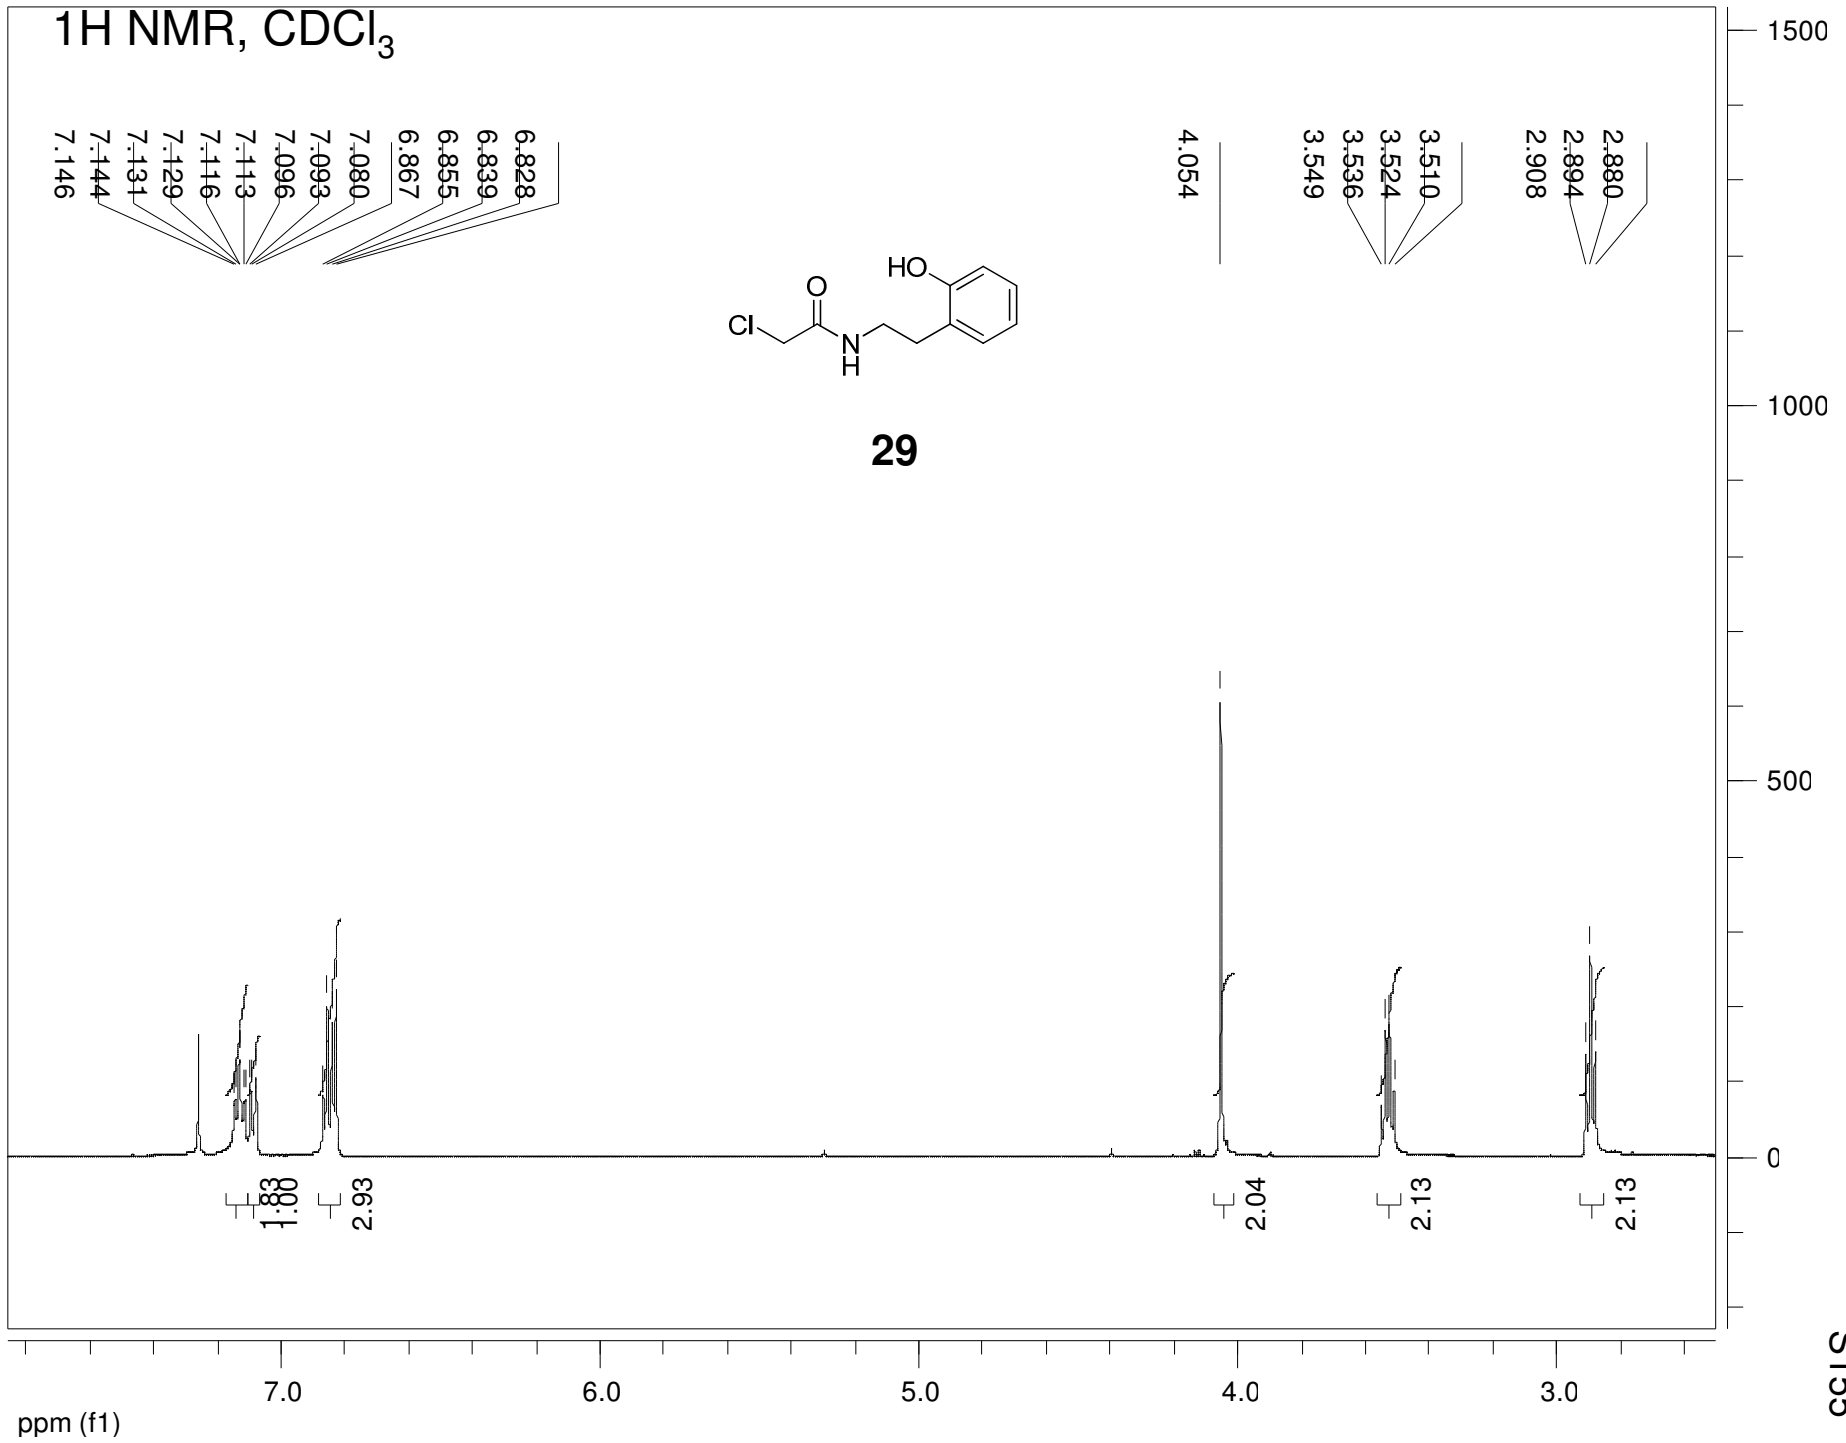

<sup>13</sup>C NMR, CDCl<sub>3</sub>

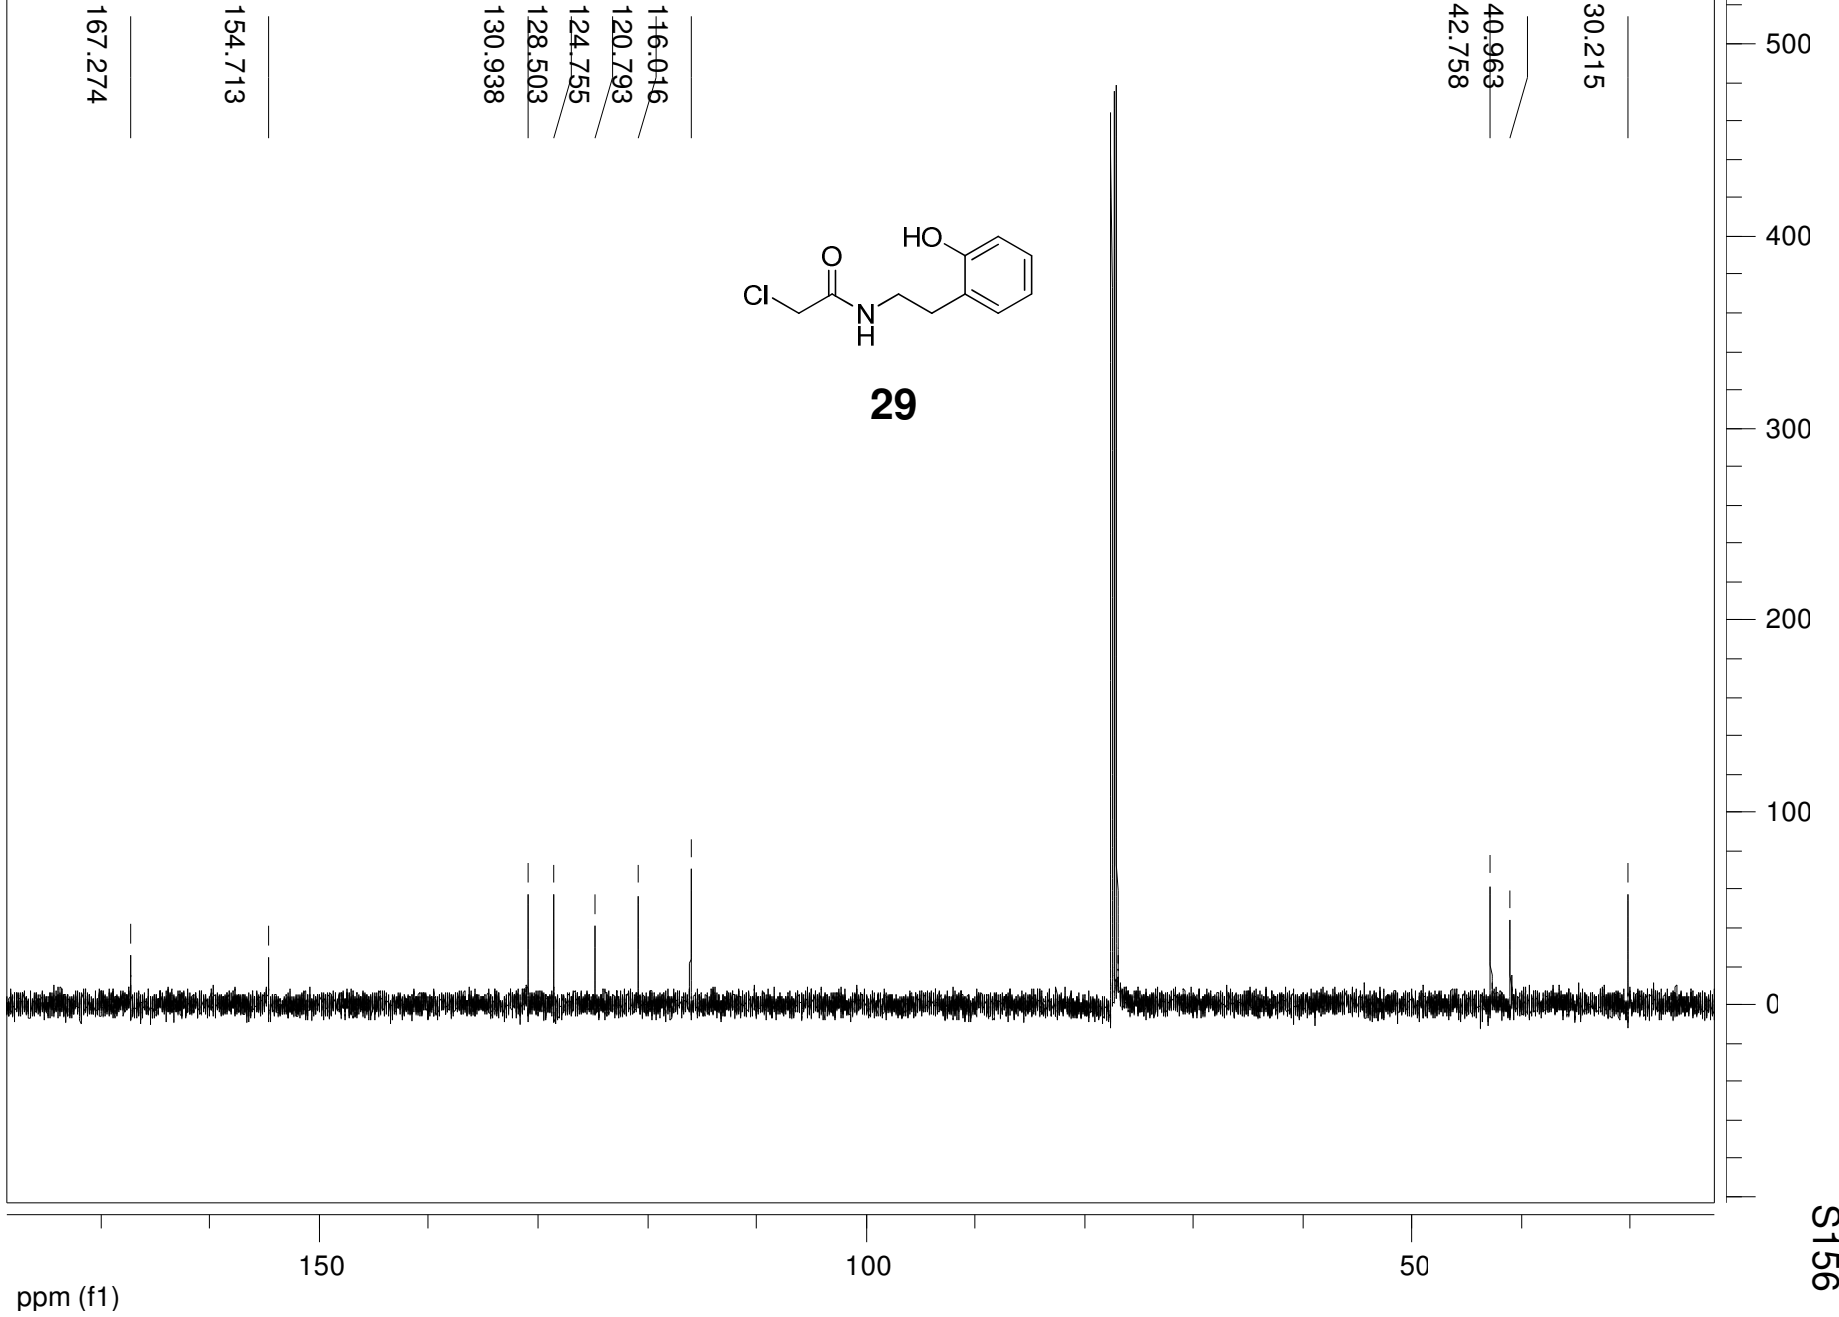



1H NMR, CDCl<sub>3</sub>

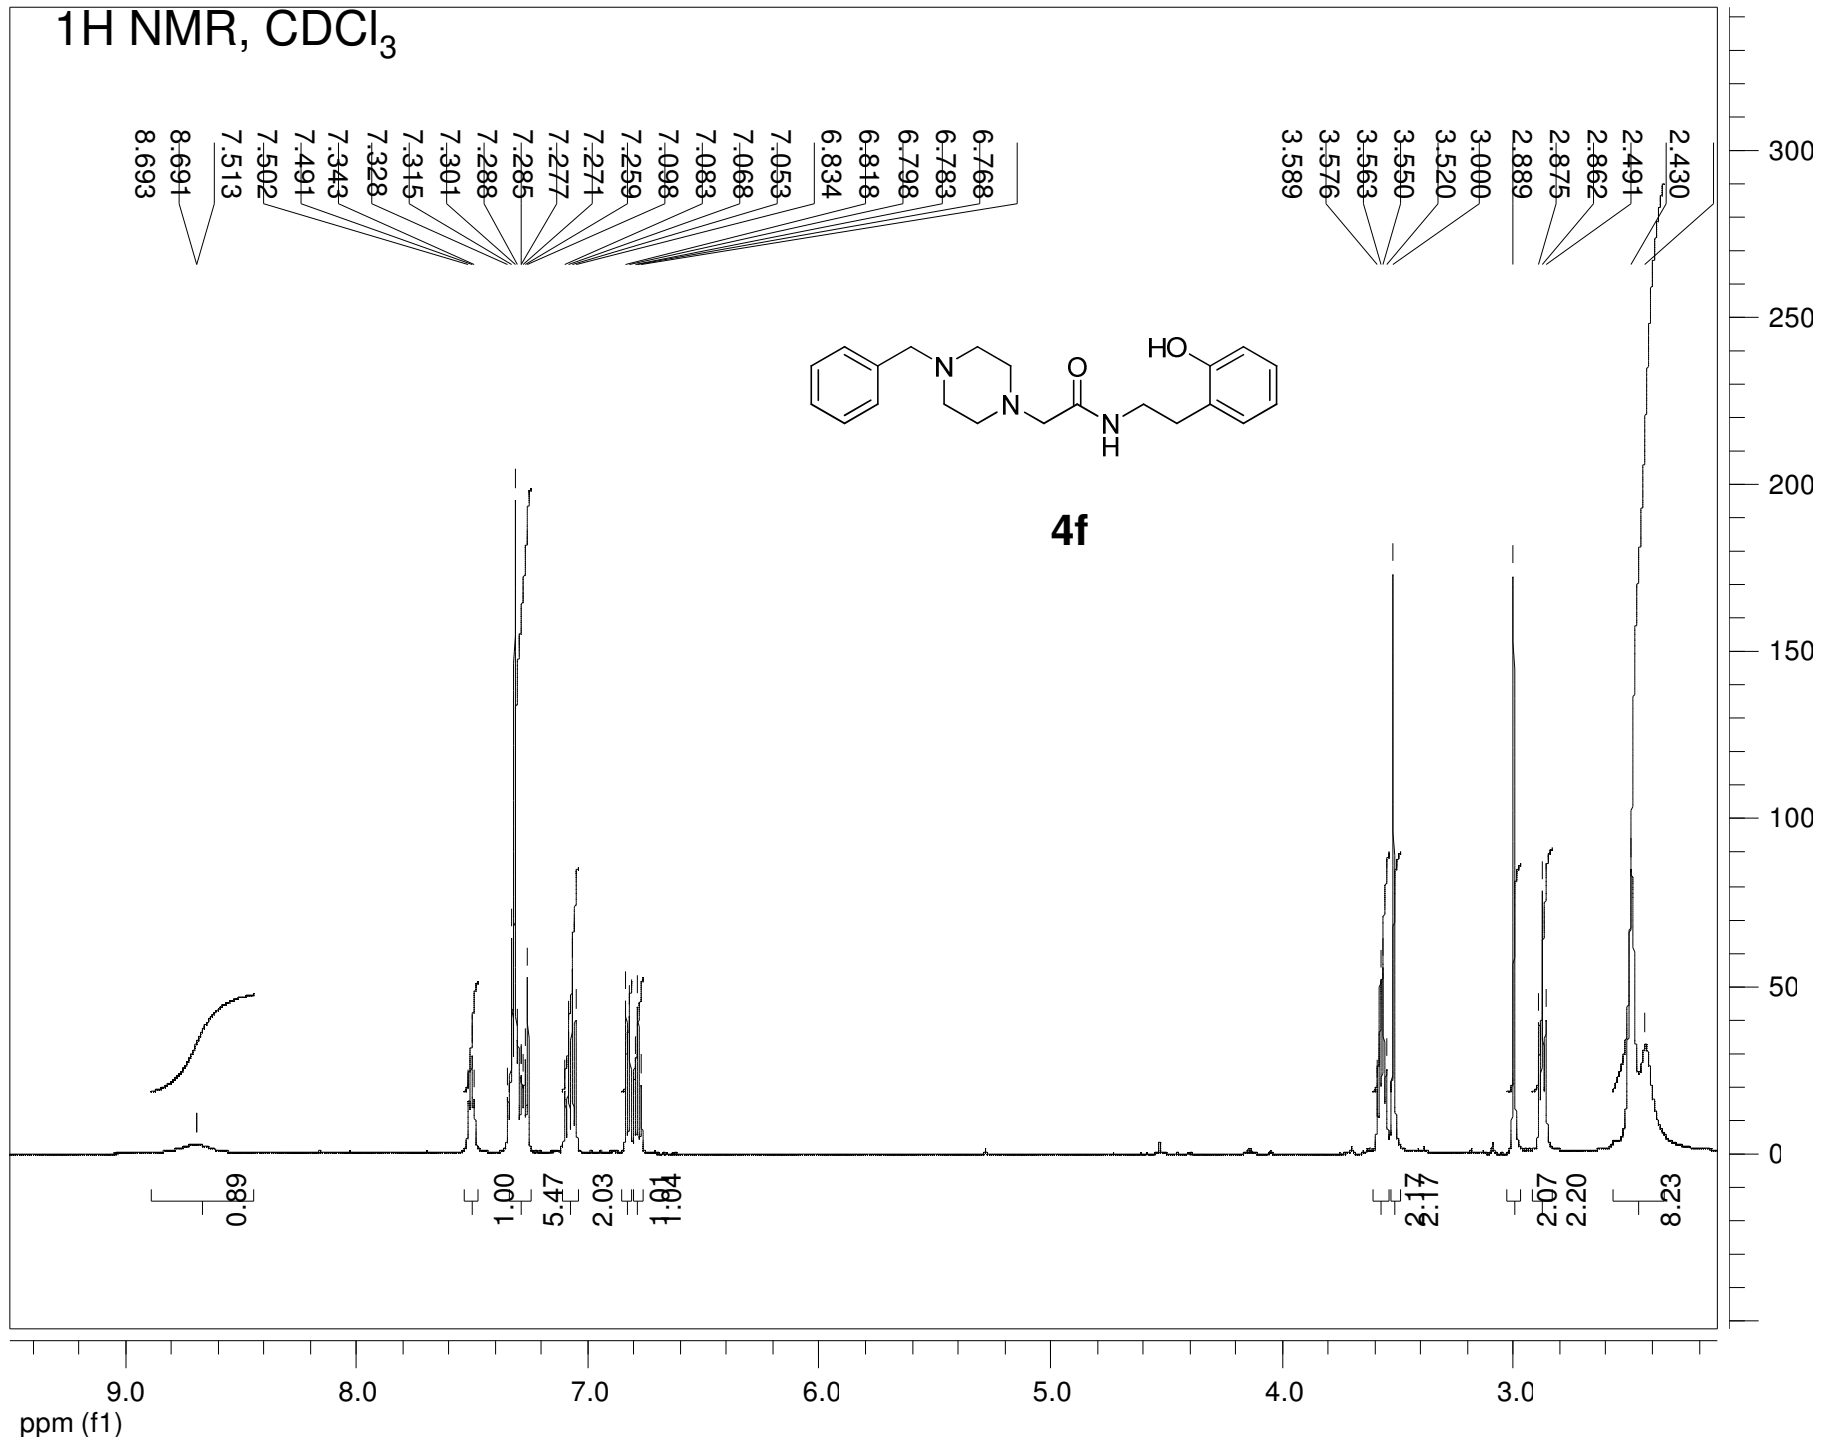

<sup>13</sup>C NMR, CDCl<sub>3</sub>

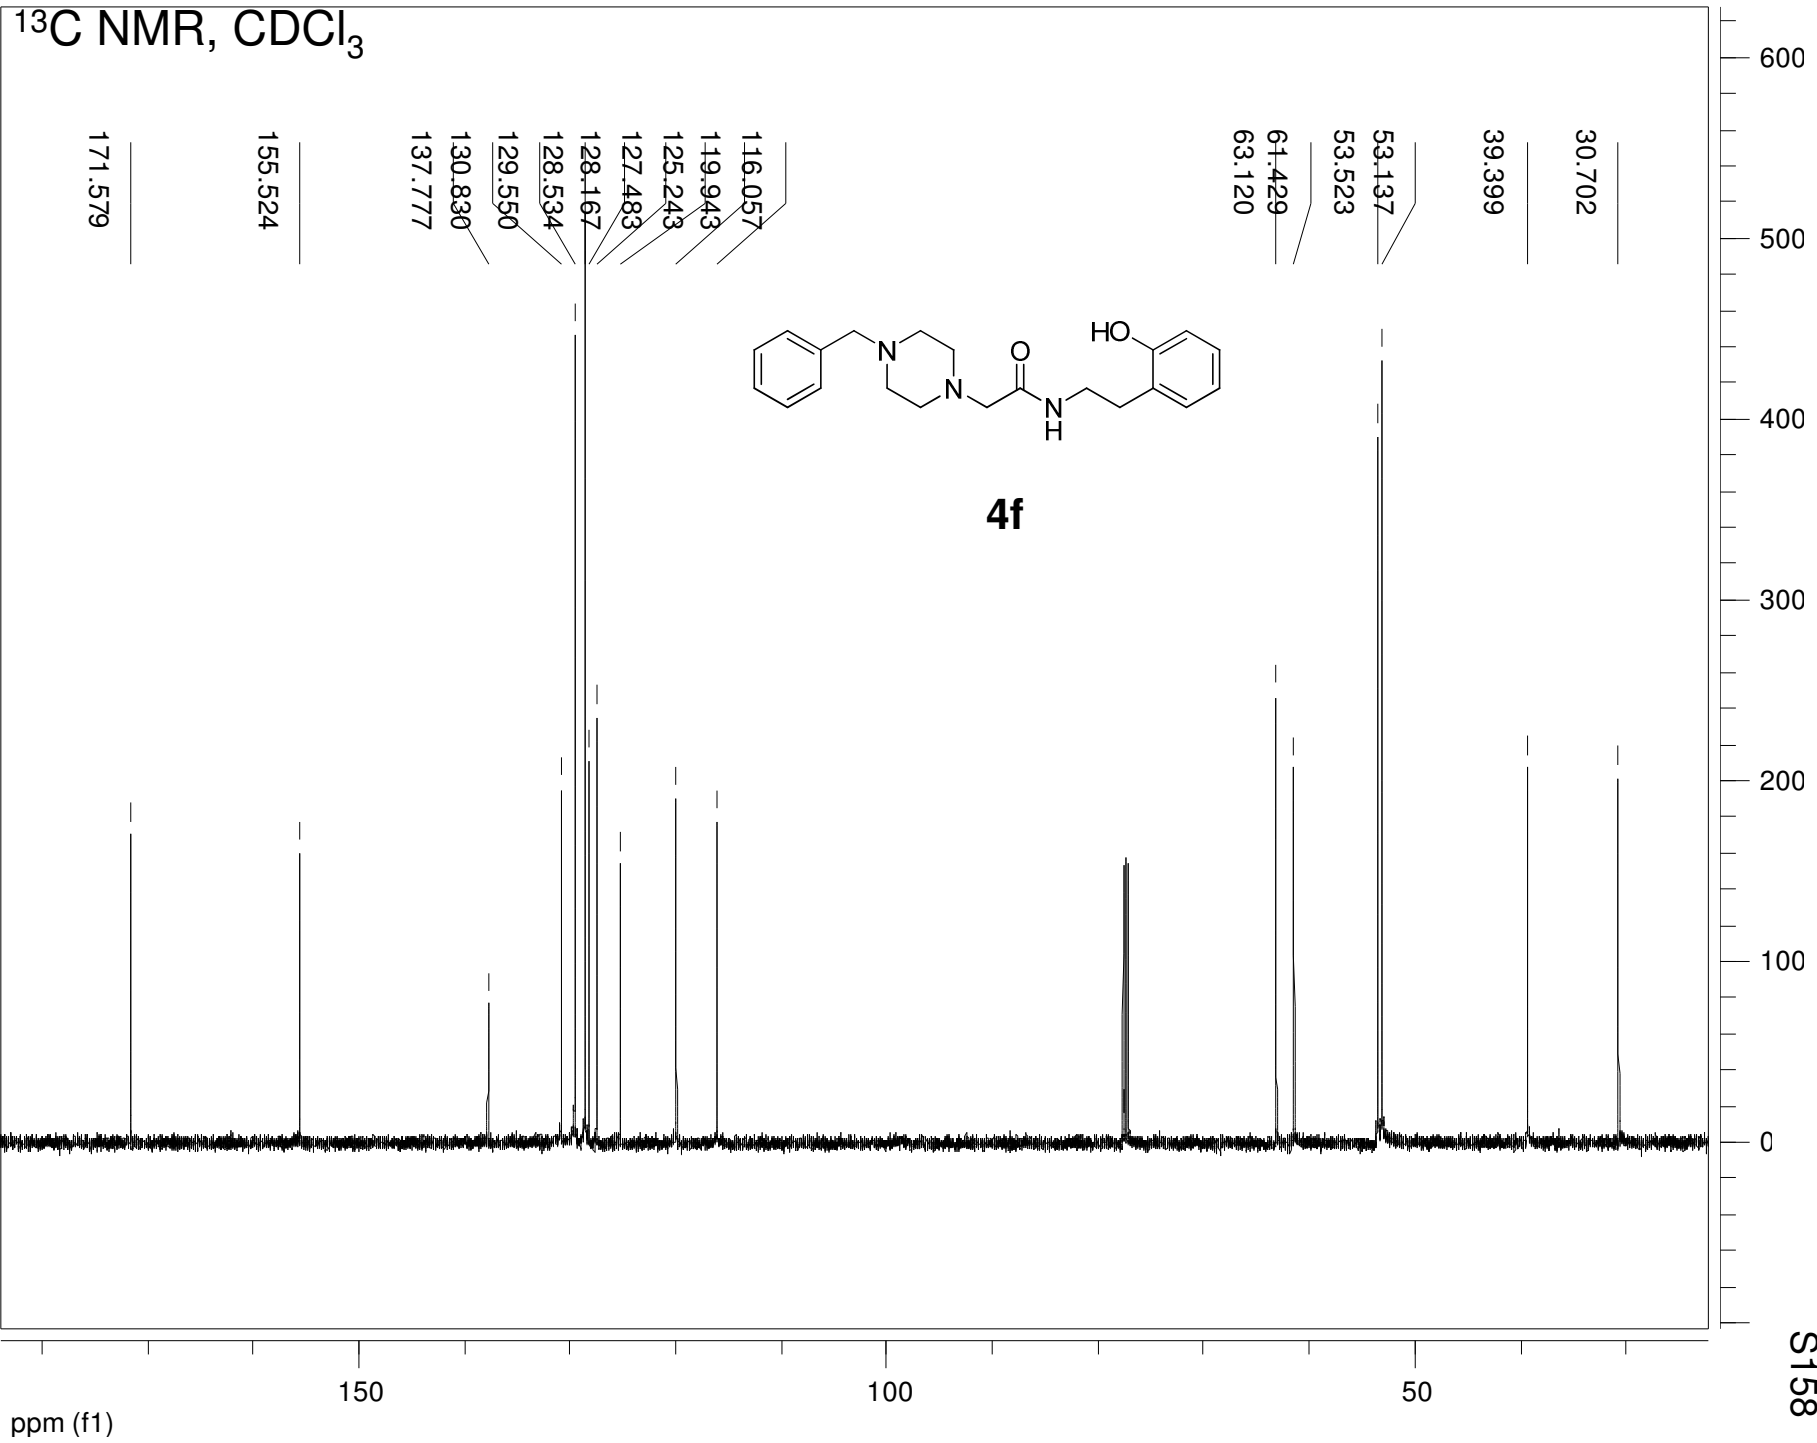

S158

LC-MS

Purity: 95%

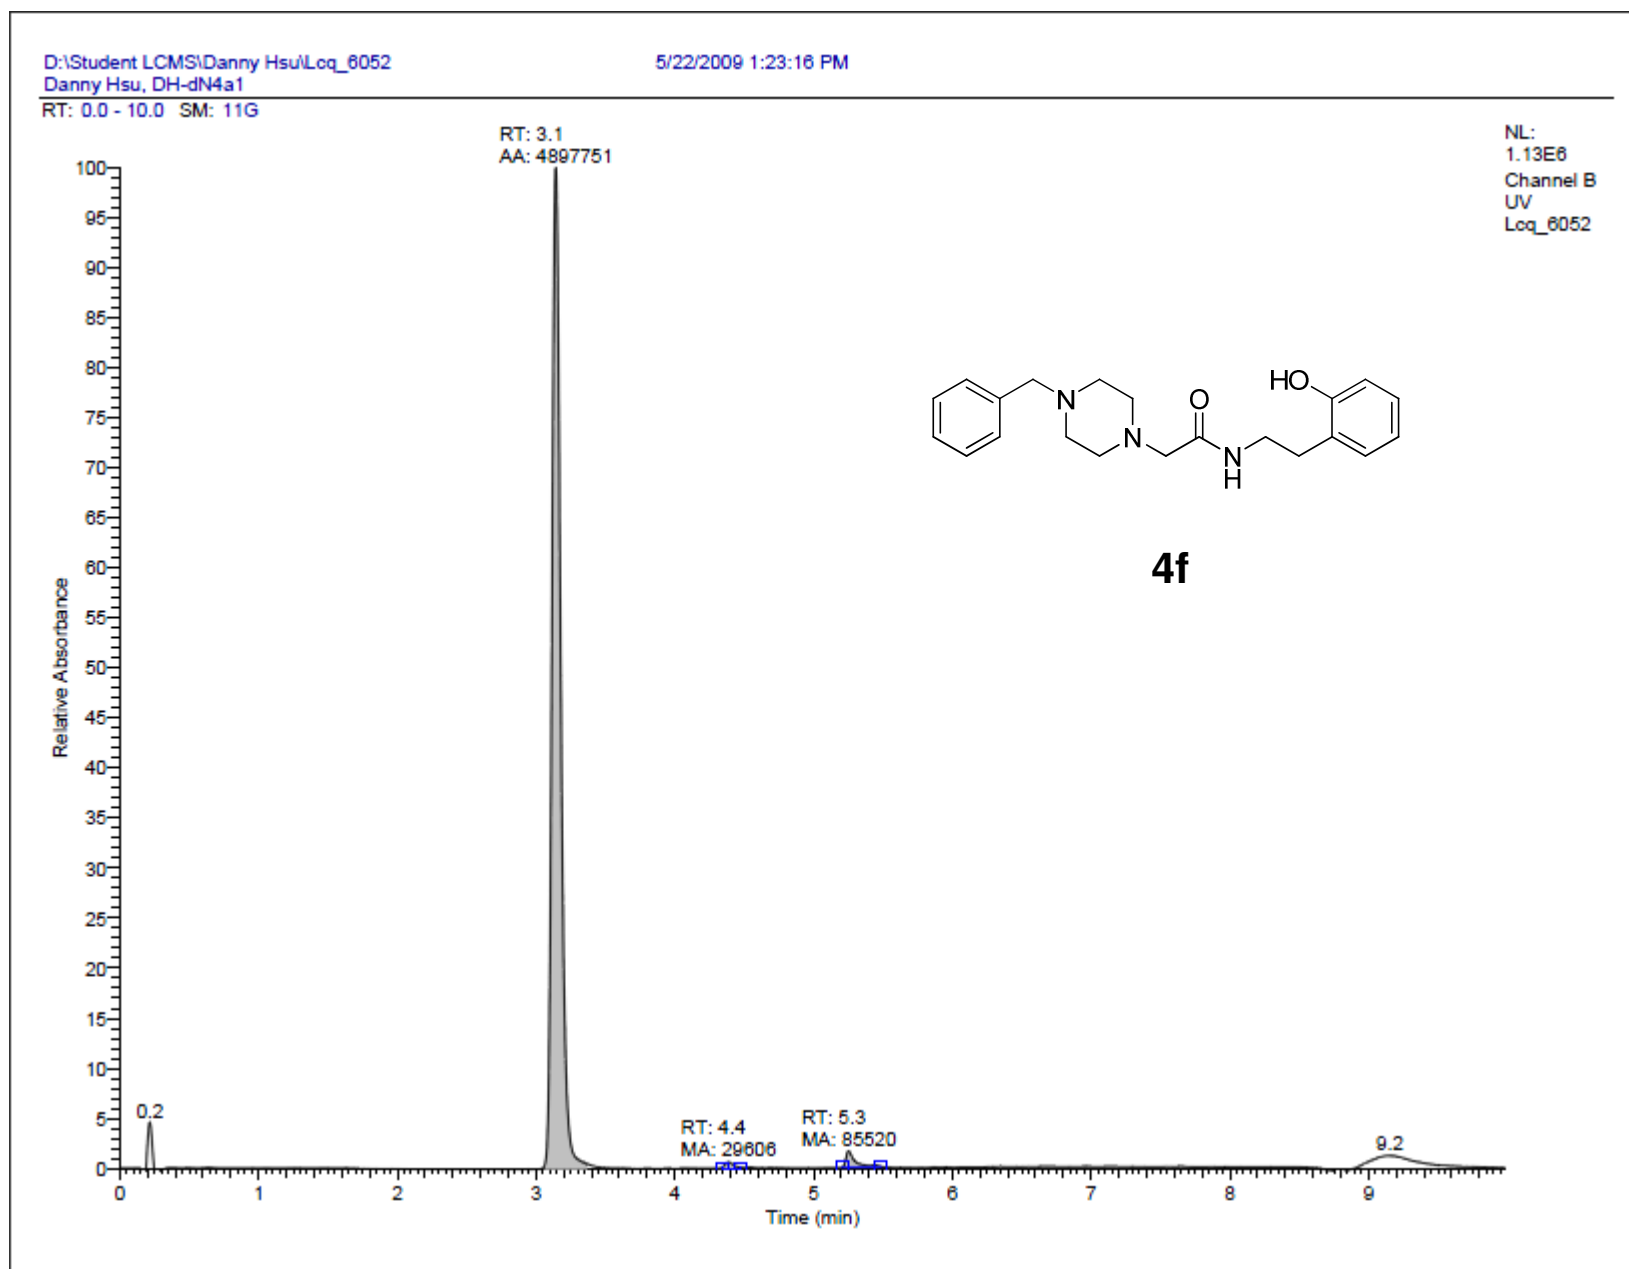

$^1\text{H NMR}$ ,  $\text{CDCl}_3$

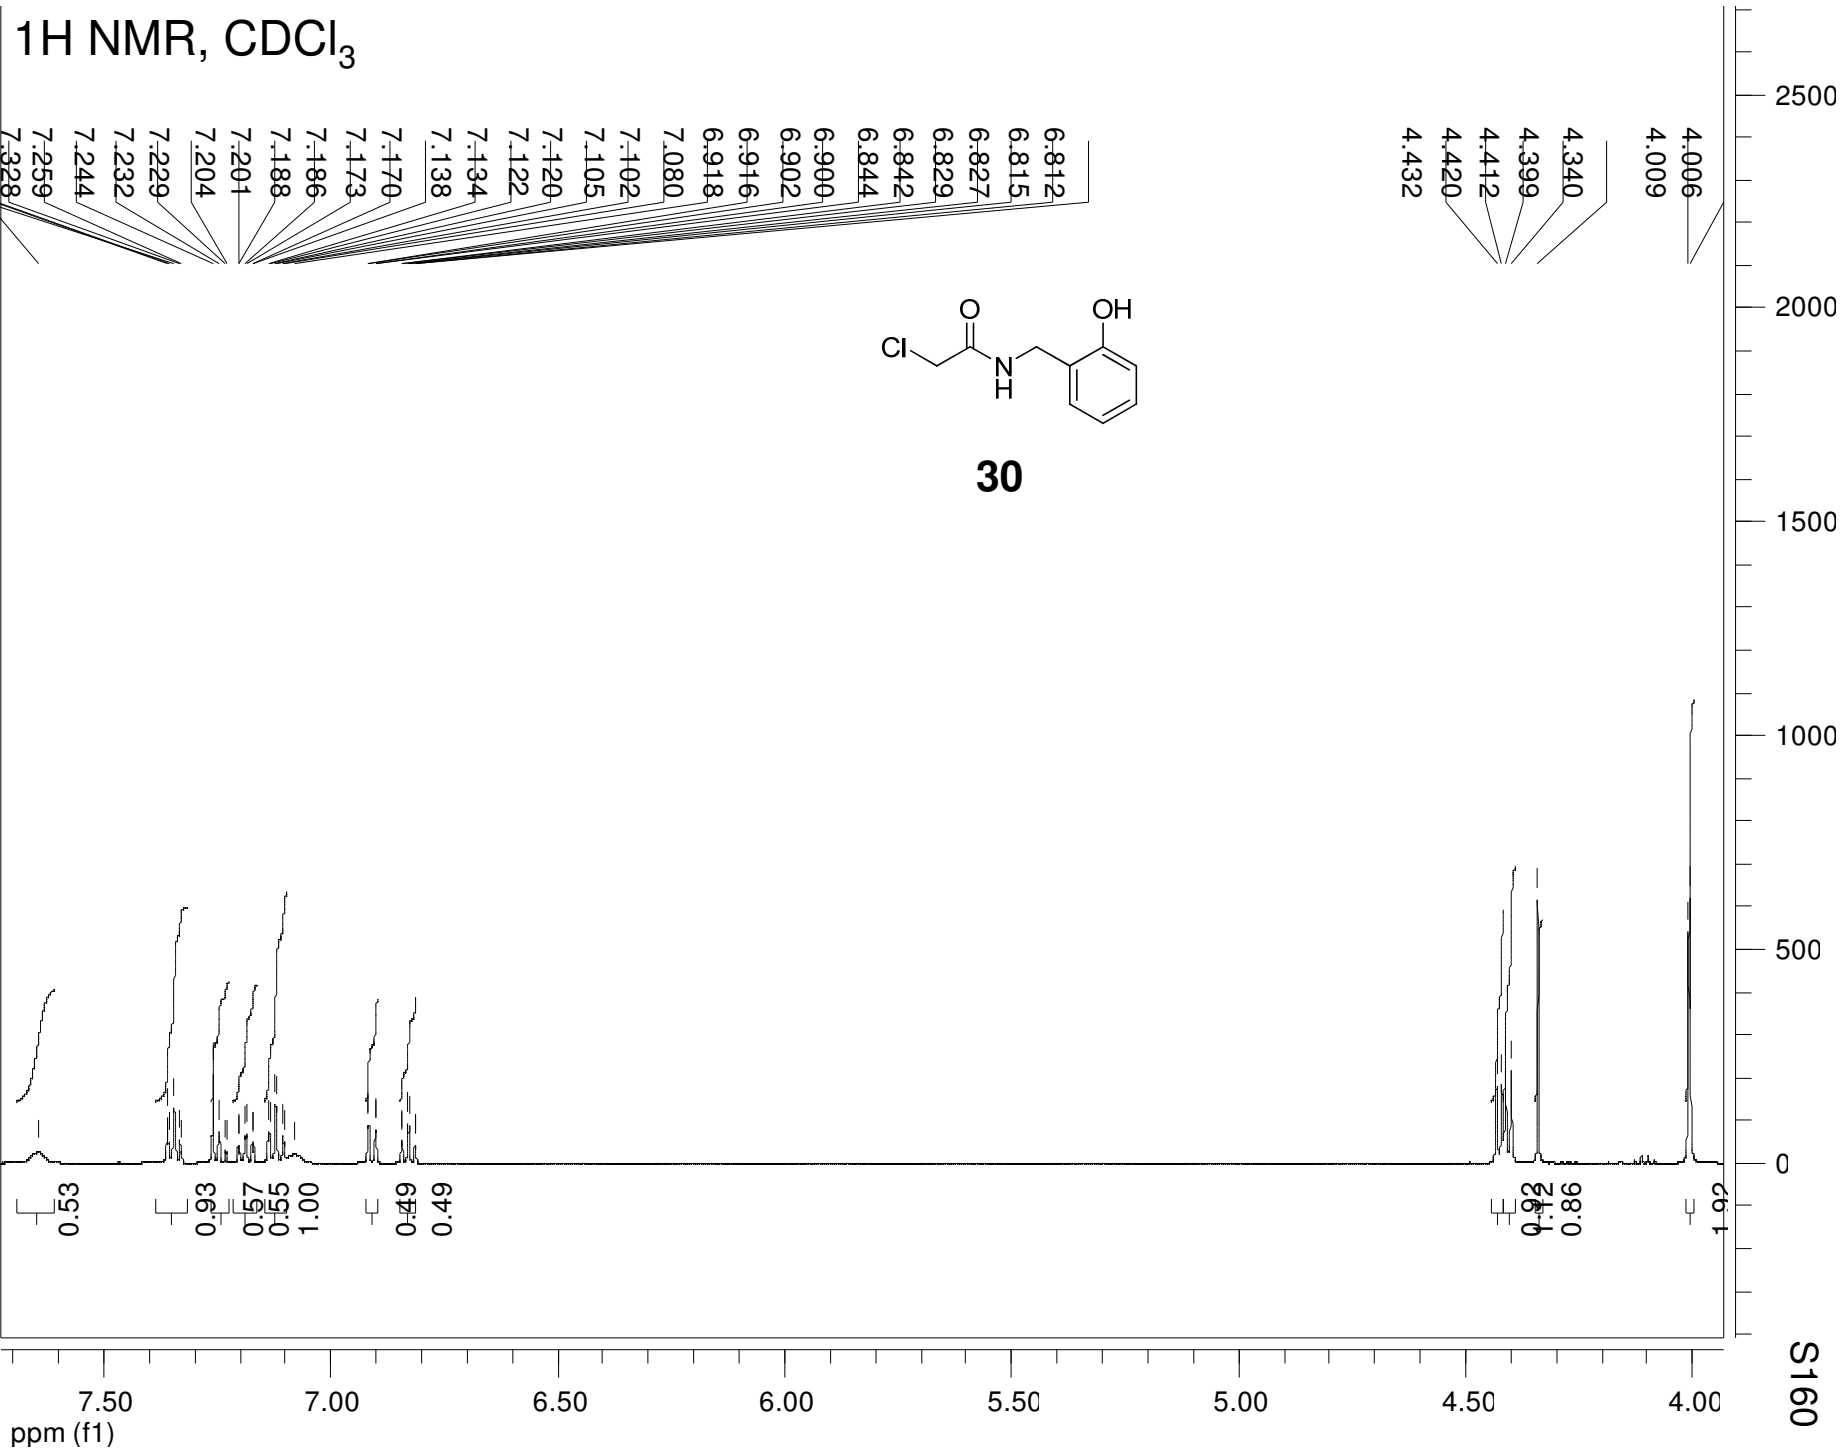

<sup>13</sup>C NMR, CDCl<sub>3</sub>

168.274  
166.489  
166.458  
155.618  
148.874

130.957  
130.704  
130.187  
129.752  
127.282  
123.690  
122.577  
120.399  
117.389

42.572  
41.135  
40.719  
39.250

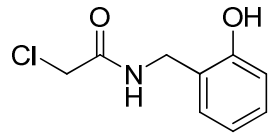

**30**

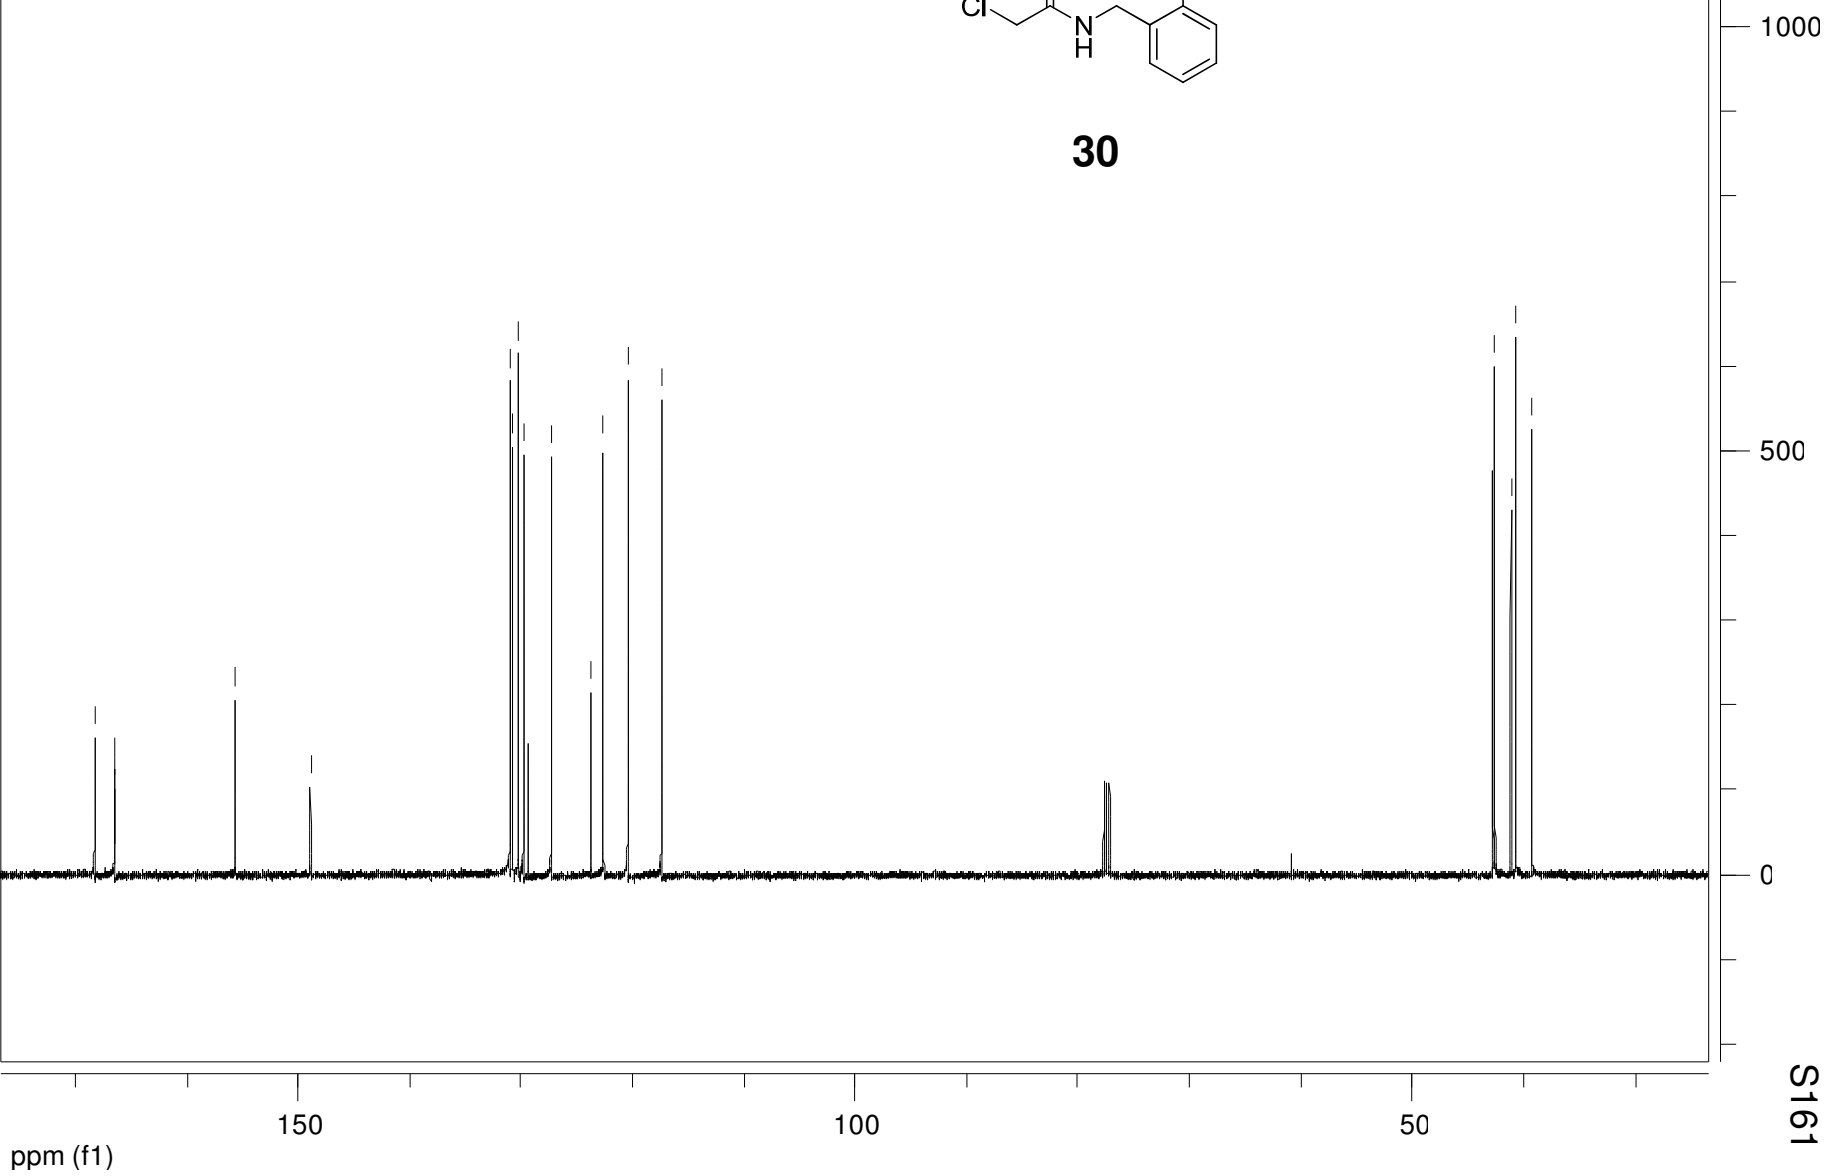

1H NMR, CDCl<sub>3</sub>

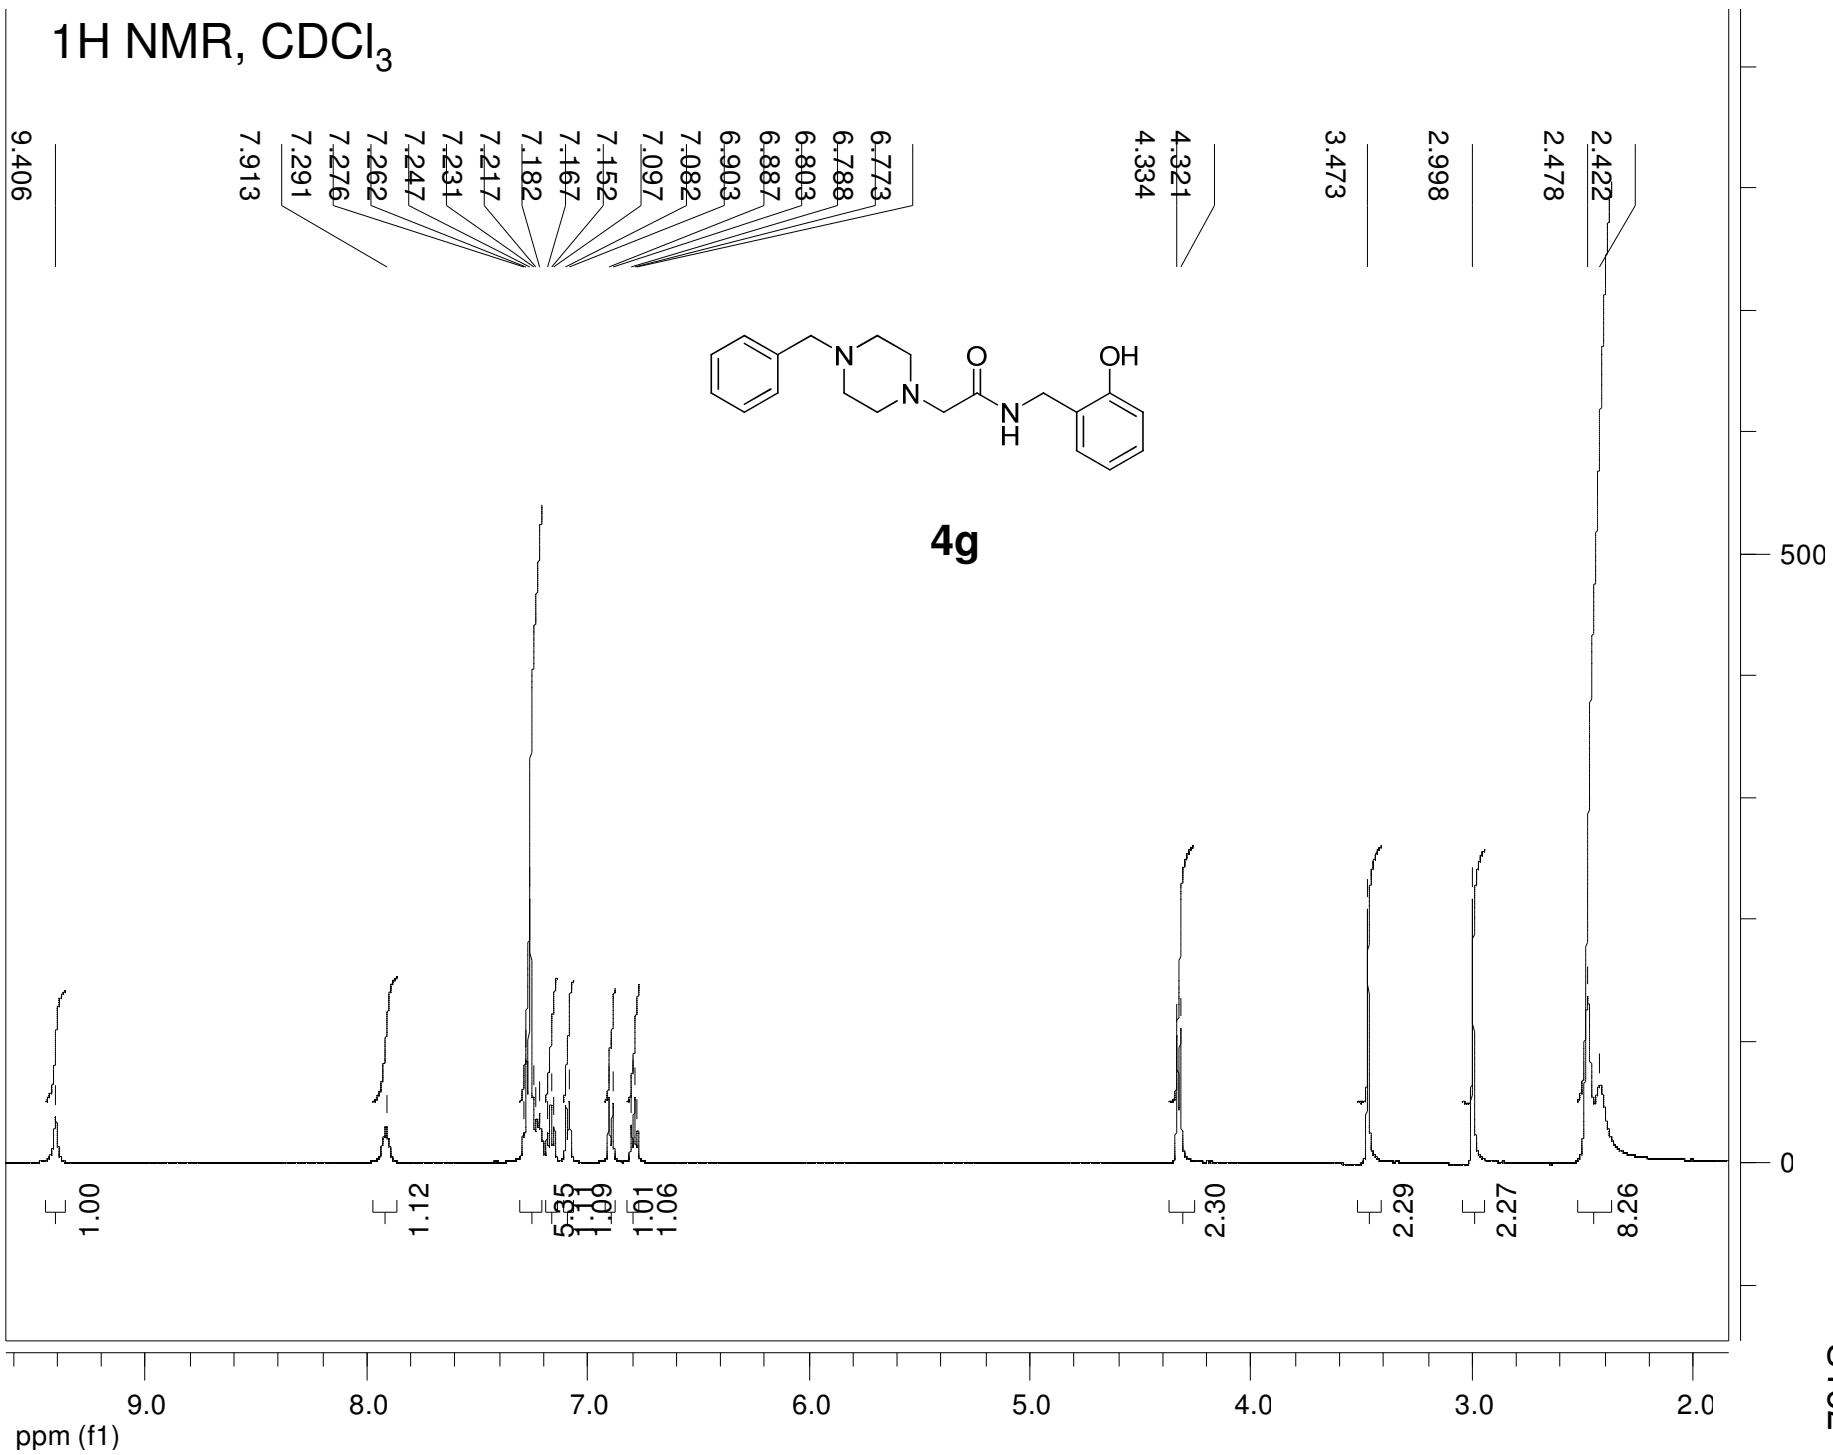

<sup>13</sup>C NMR, CDCl<sub>3</sub>

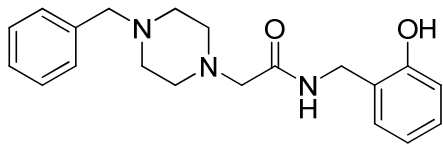

**4g**

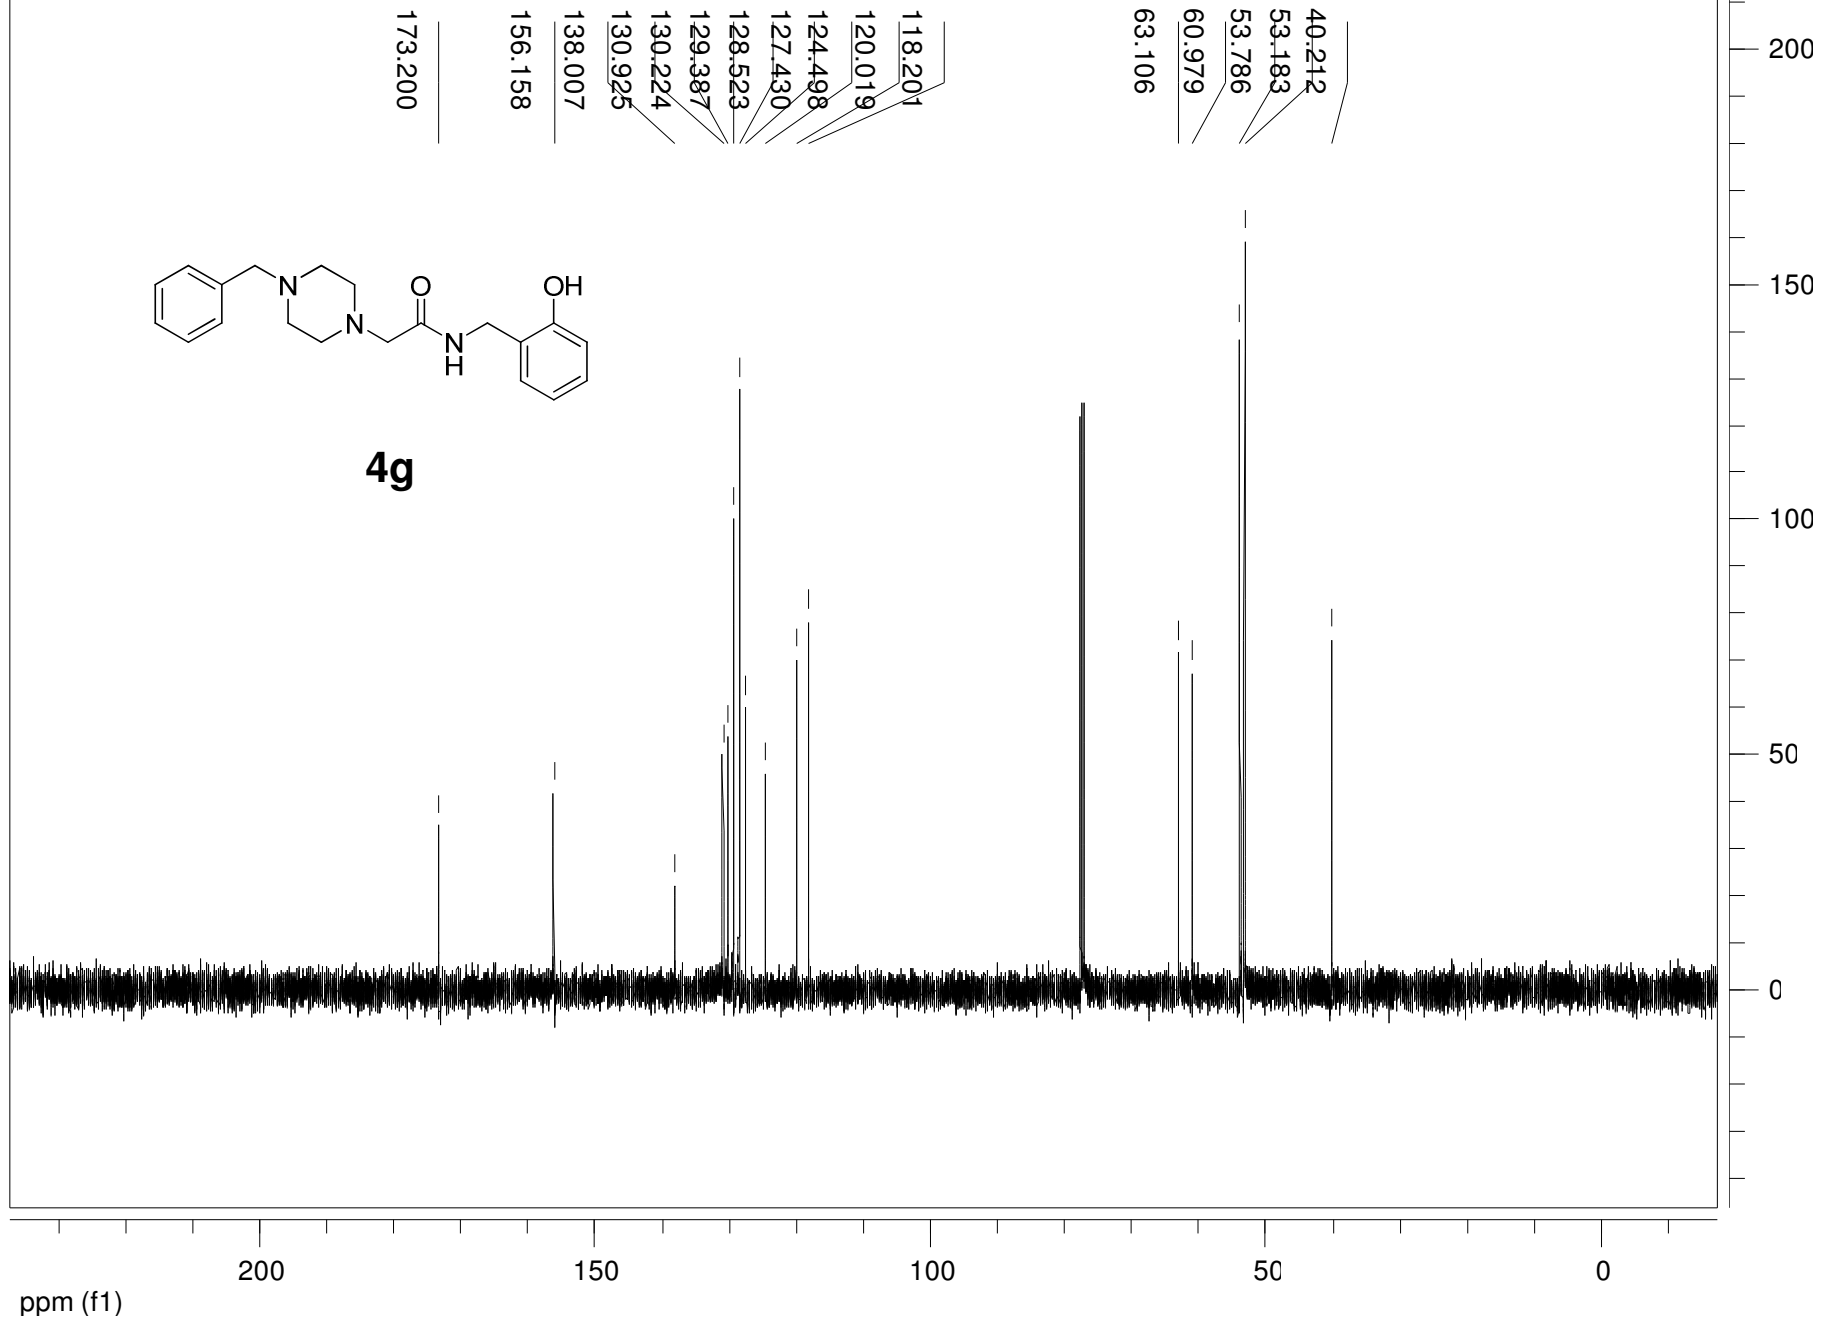

# HPLC

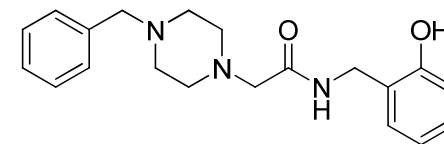

**4g**

\* RUN # 443      JAN 8, 2008 17:15:55

START

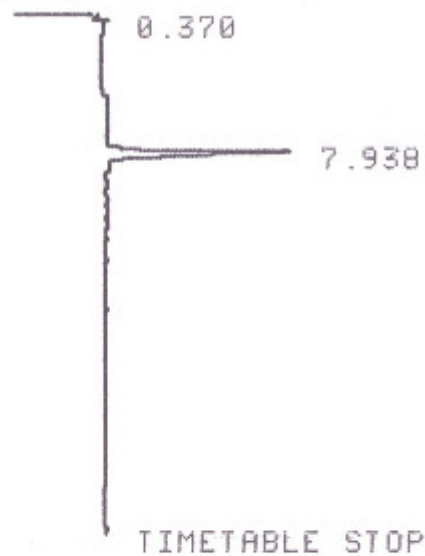

RUN# 443      JAN 8, 2008 17:15:55

AREA%

| RT    | AREA    | TYPE | WIDTH | AREA%    |
|-------|---------|------|-------|----------|
| .370  | 183065  | BB   | .128  | 3.38447  |
| 7.938 | 5225914 | BB   | .300  | 96.61555 |

TOTAL AREA=5408976

MUL FACTOR=1.0000E+00



1H NMR, CDCl<sub>3</sub>

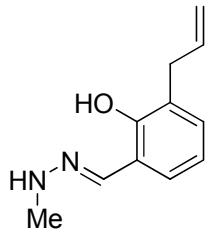

47

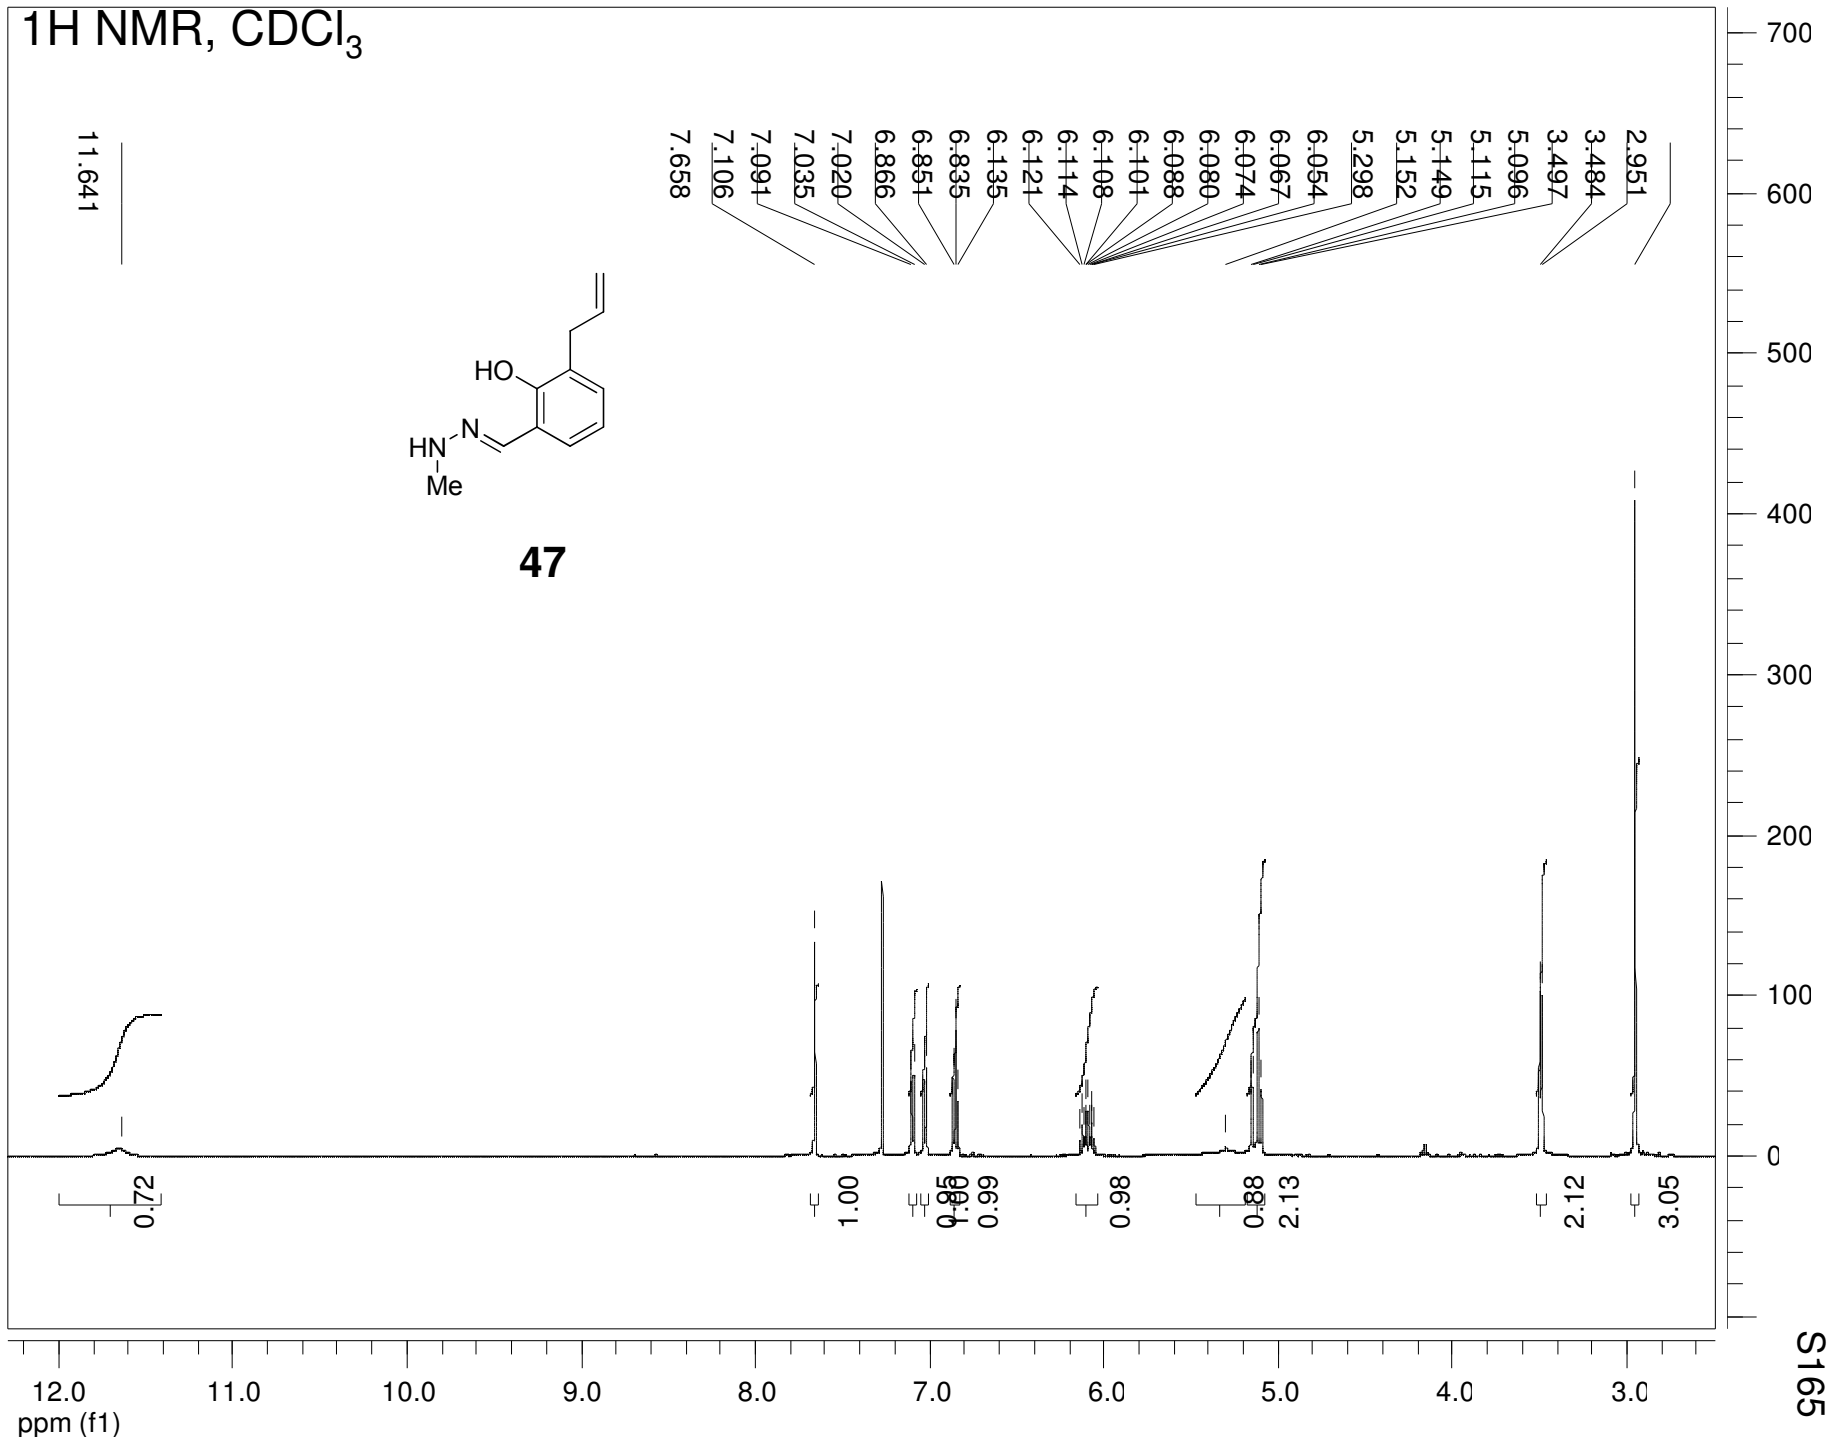

<sup>13</sup>C NMR, CDCl<sub>3</sub>

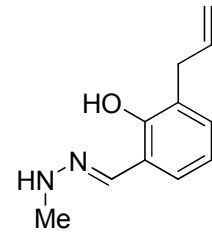

**47**

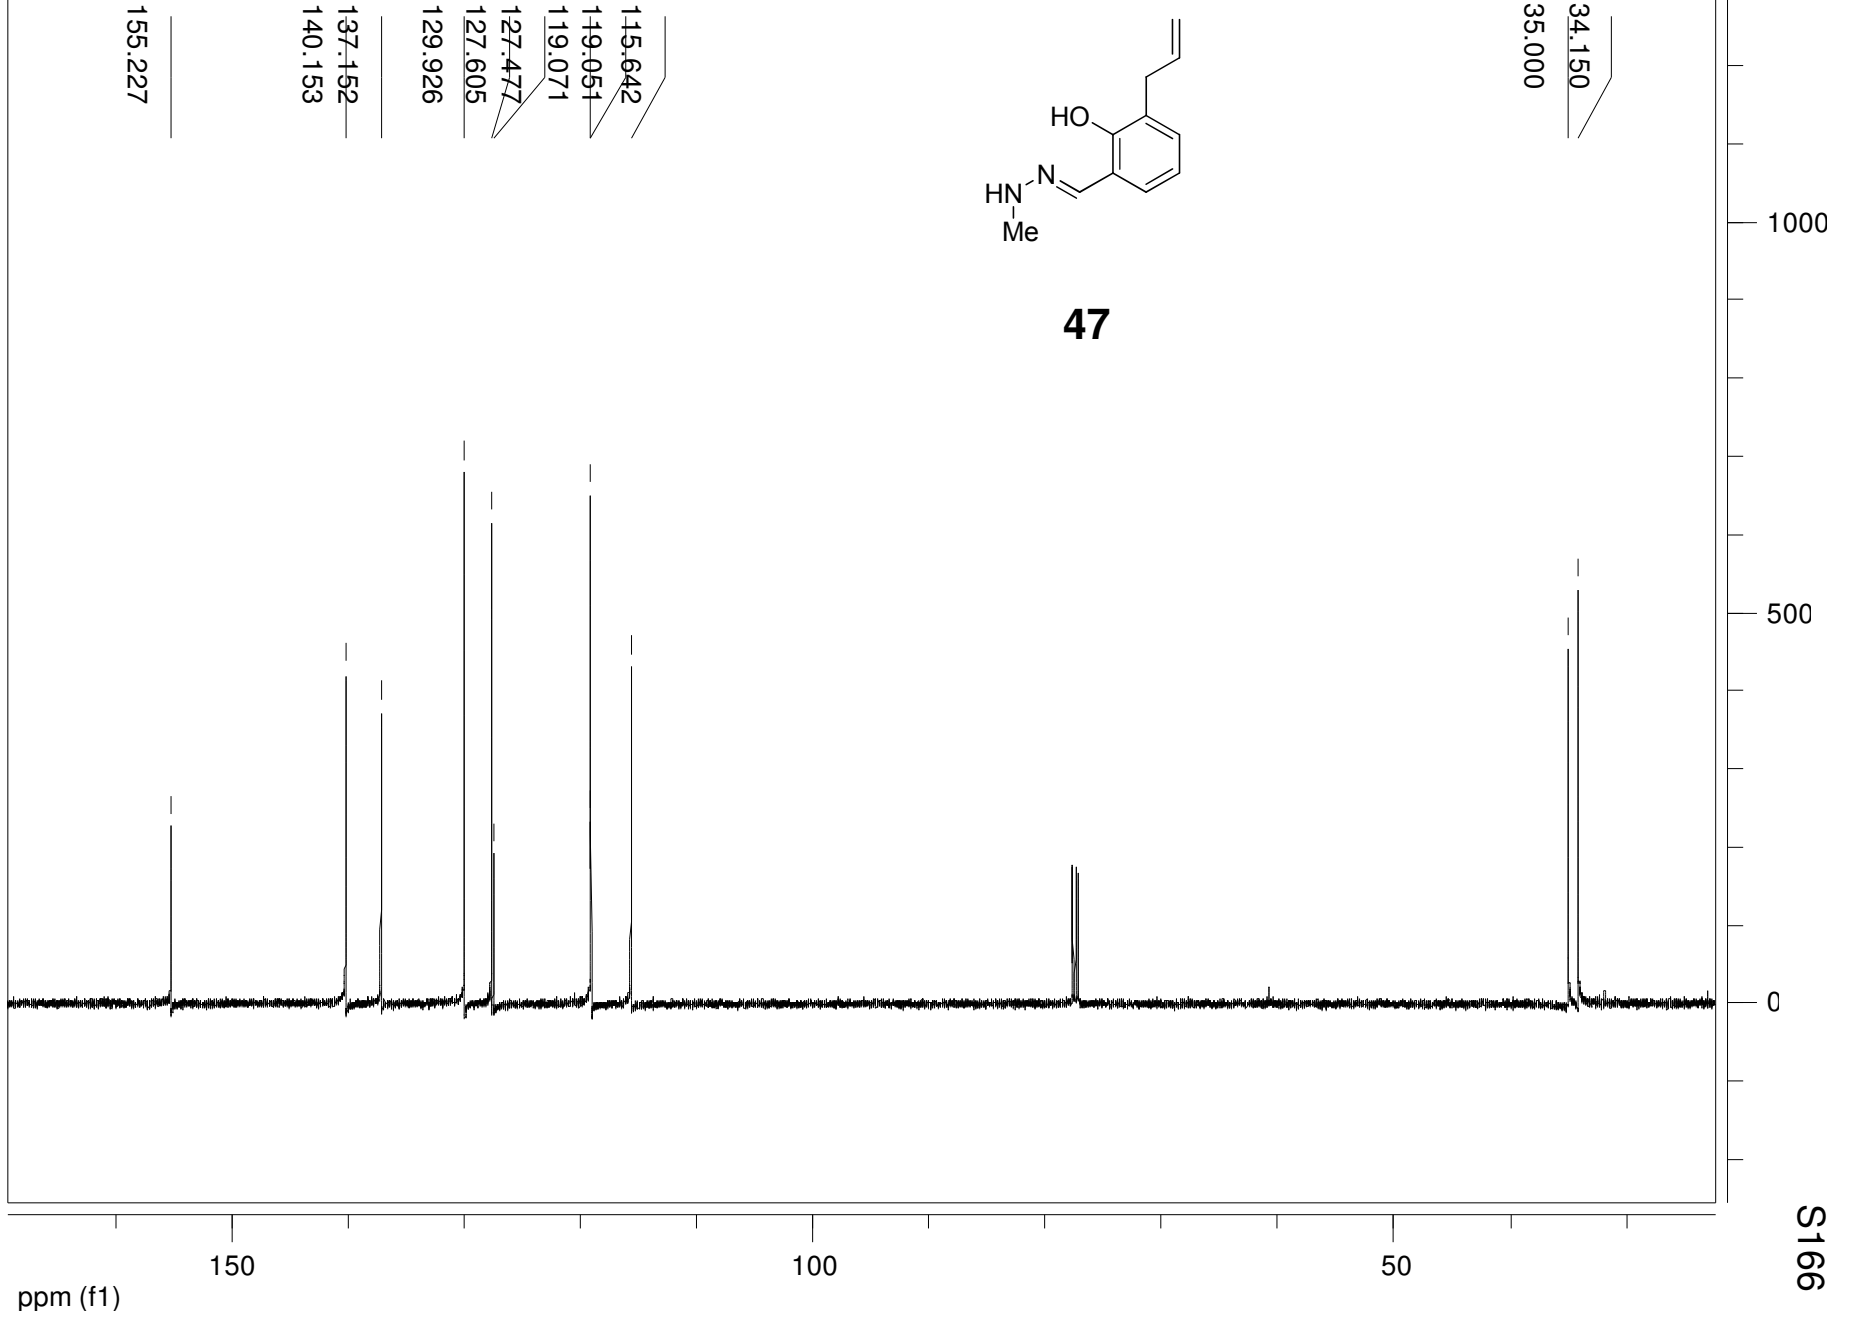

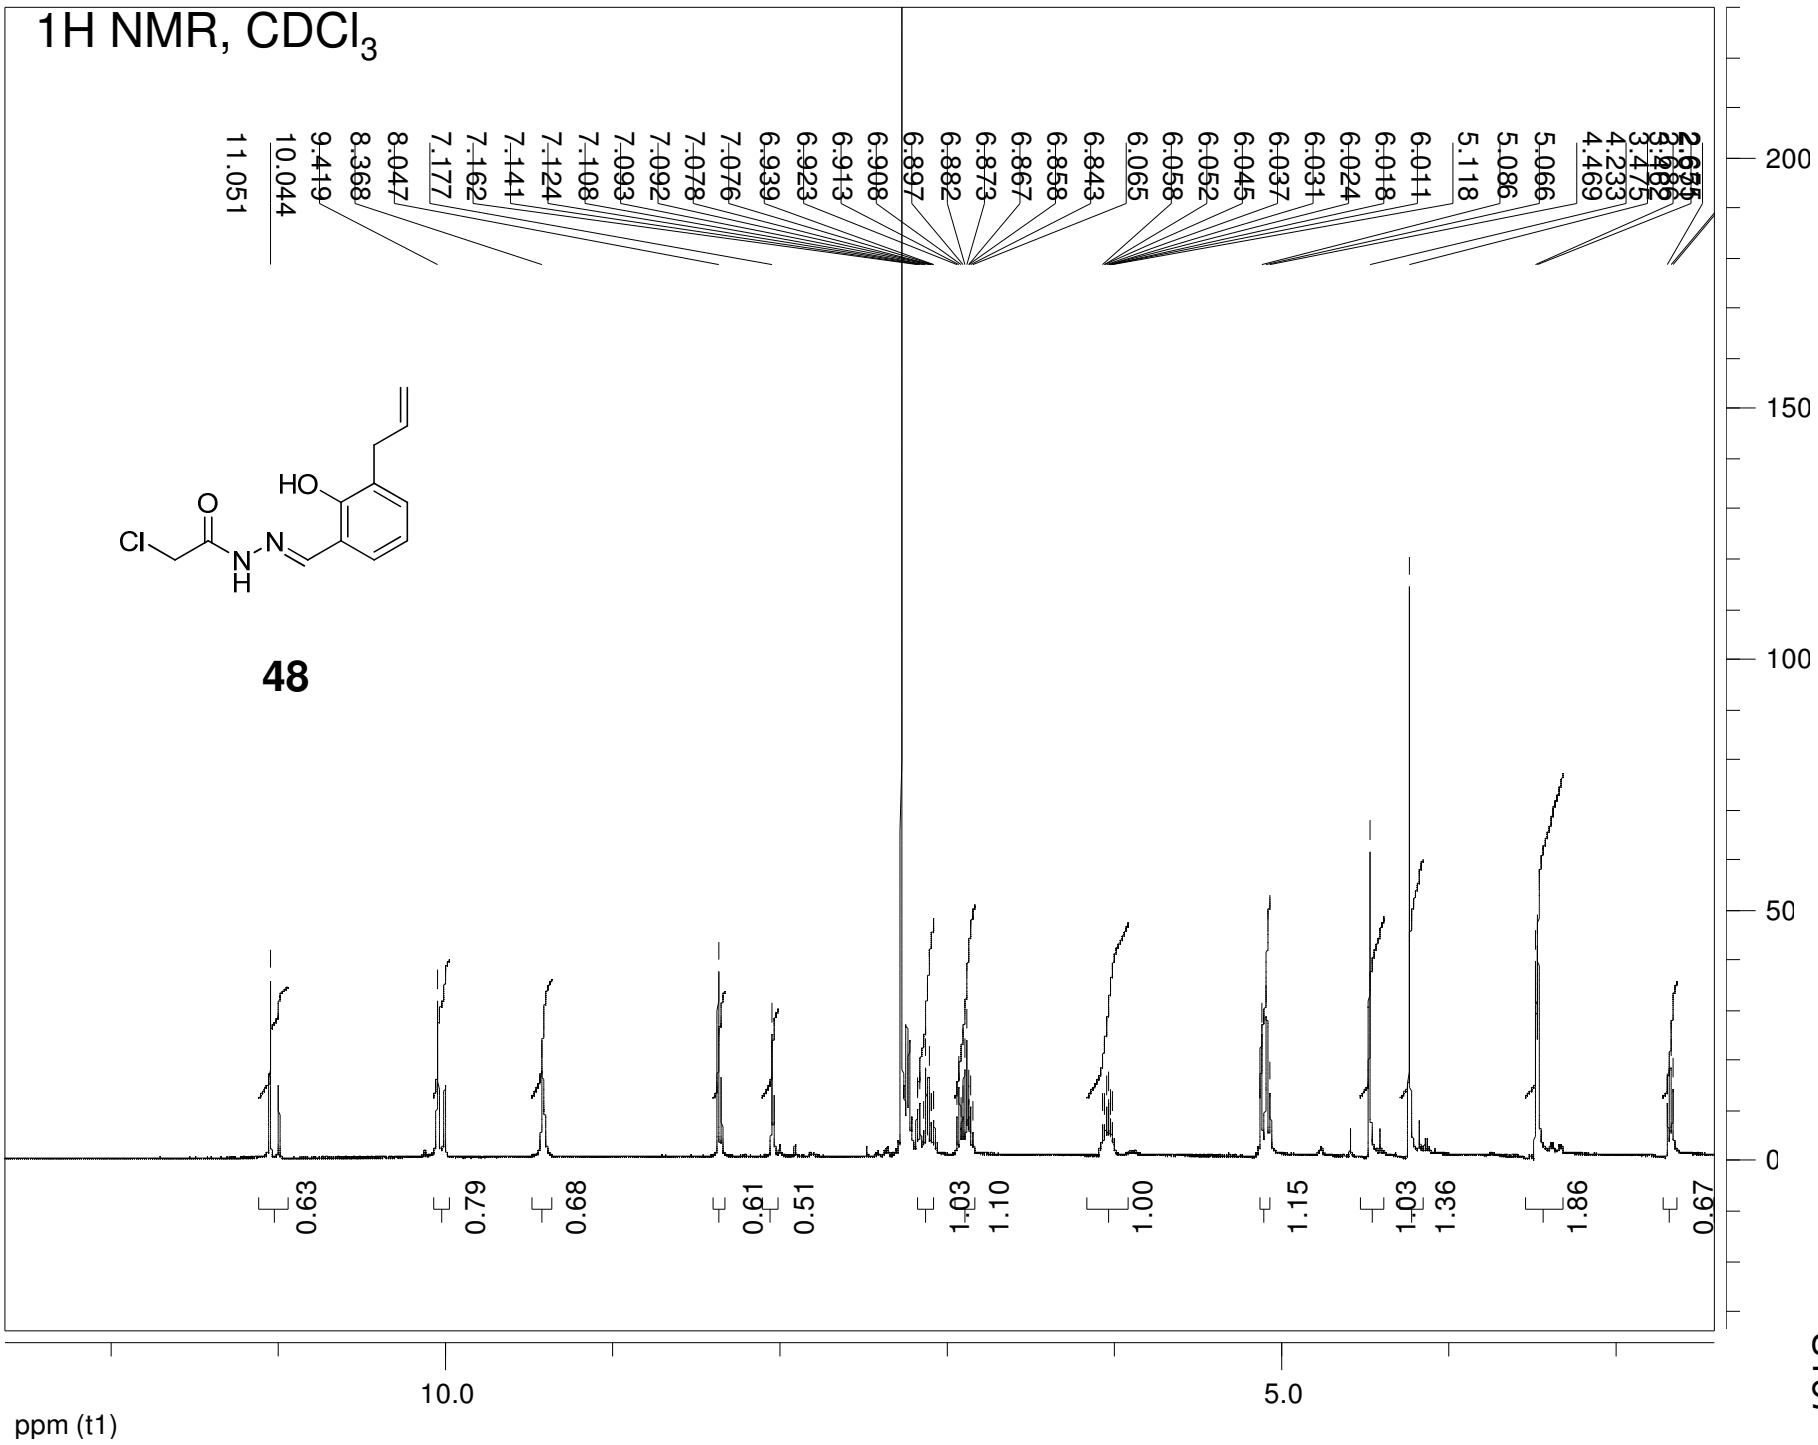



<sup>13</sup>C NMR, CDCl<sub>3</sub>

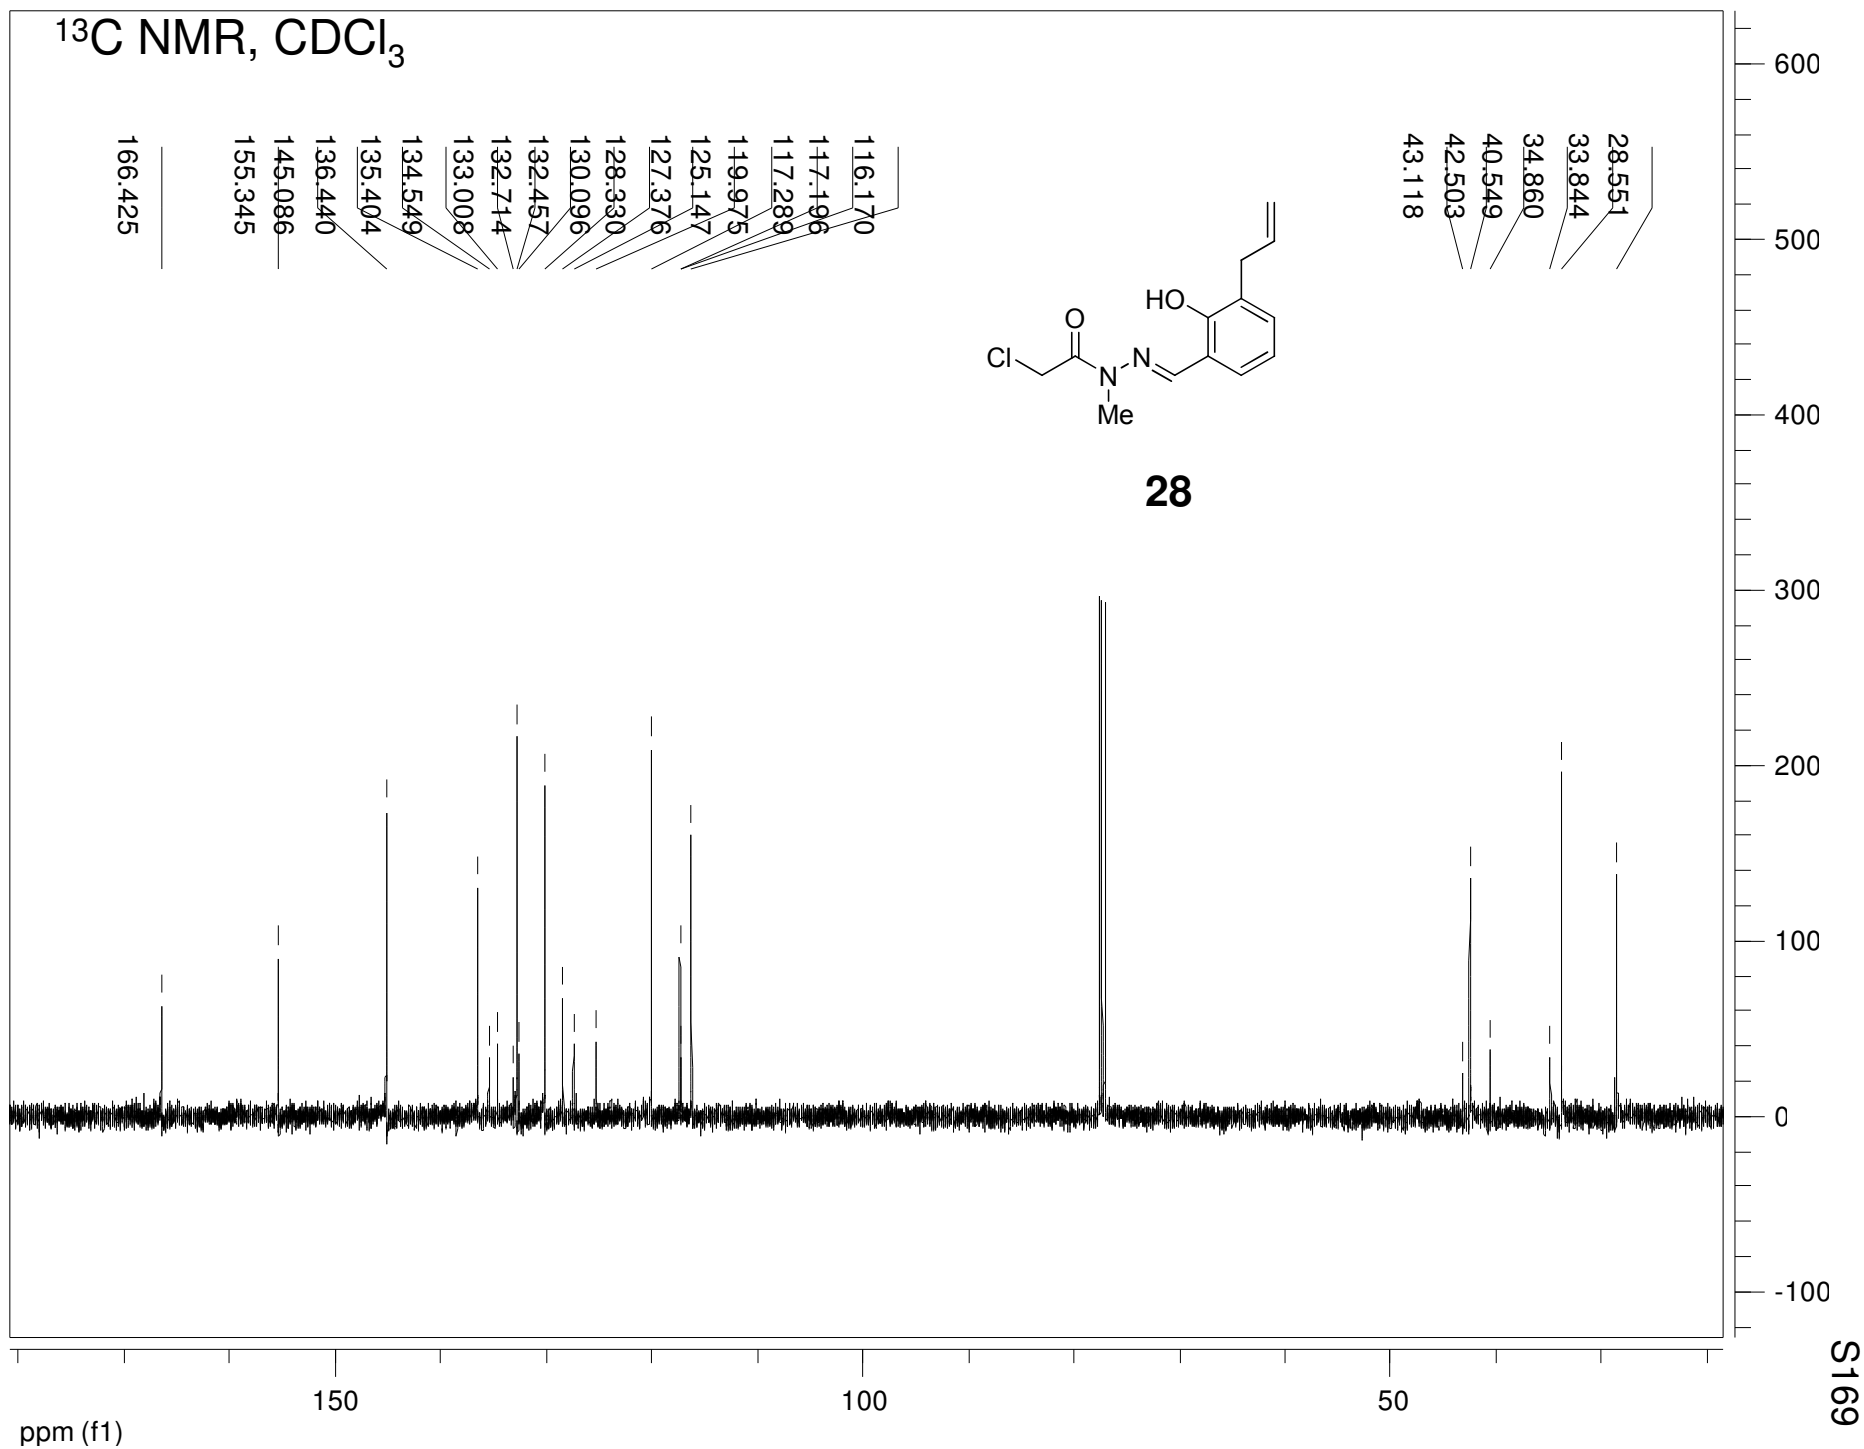

S169

1H NMR, CDCl<sub>3</sub>

11.257

10.108

8.461

7.322

7.307

7.296

7.205

7.190

7.108

7.093

7.044

7.027

7.010

6.876

6.861

6.846

6.065

6.058

6.051

6.044

6.031

6.024

6.017

6.010

5.997

5.110

5.075

5.054

3.559

3.467

3.454

3.224

2.872

2.567

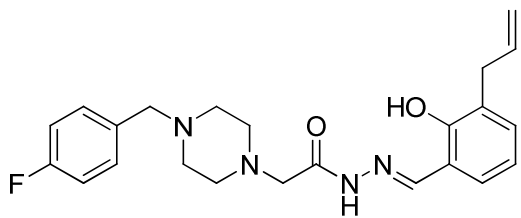

2d

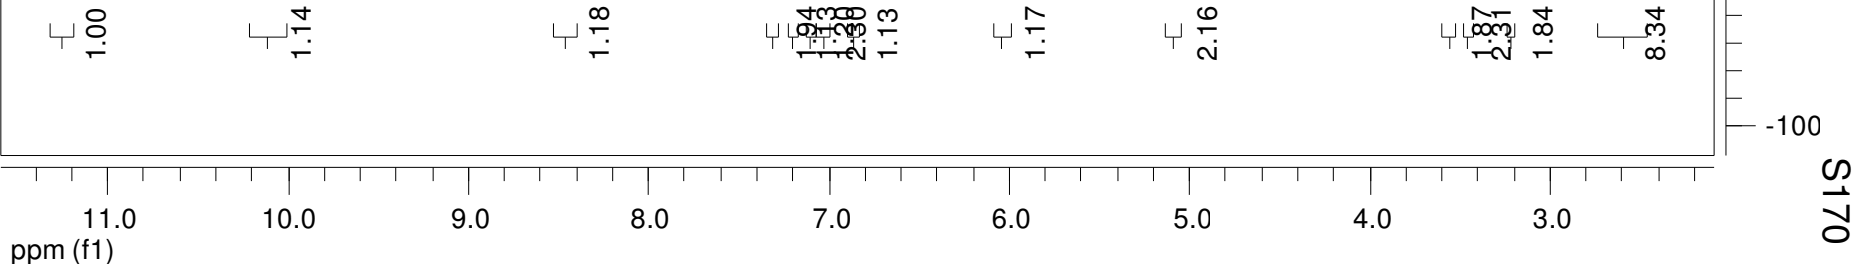

$^{13}\text{C}$  NMR,  $\text{CDCl}_3$

+ - ZPAL - C - 0945

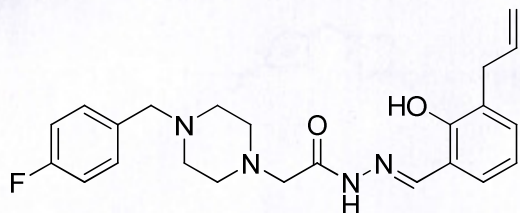

**2d**

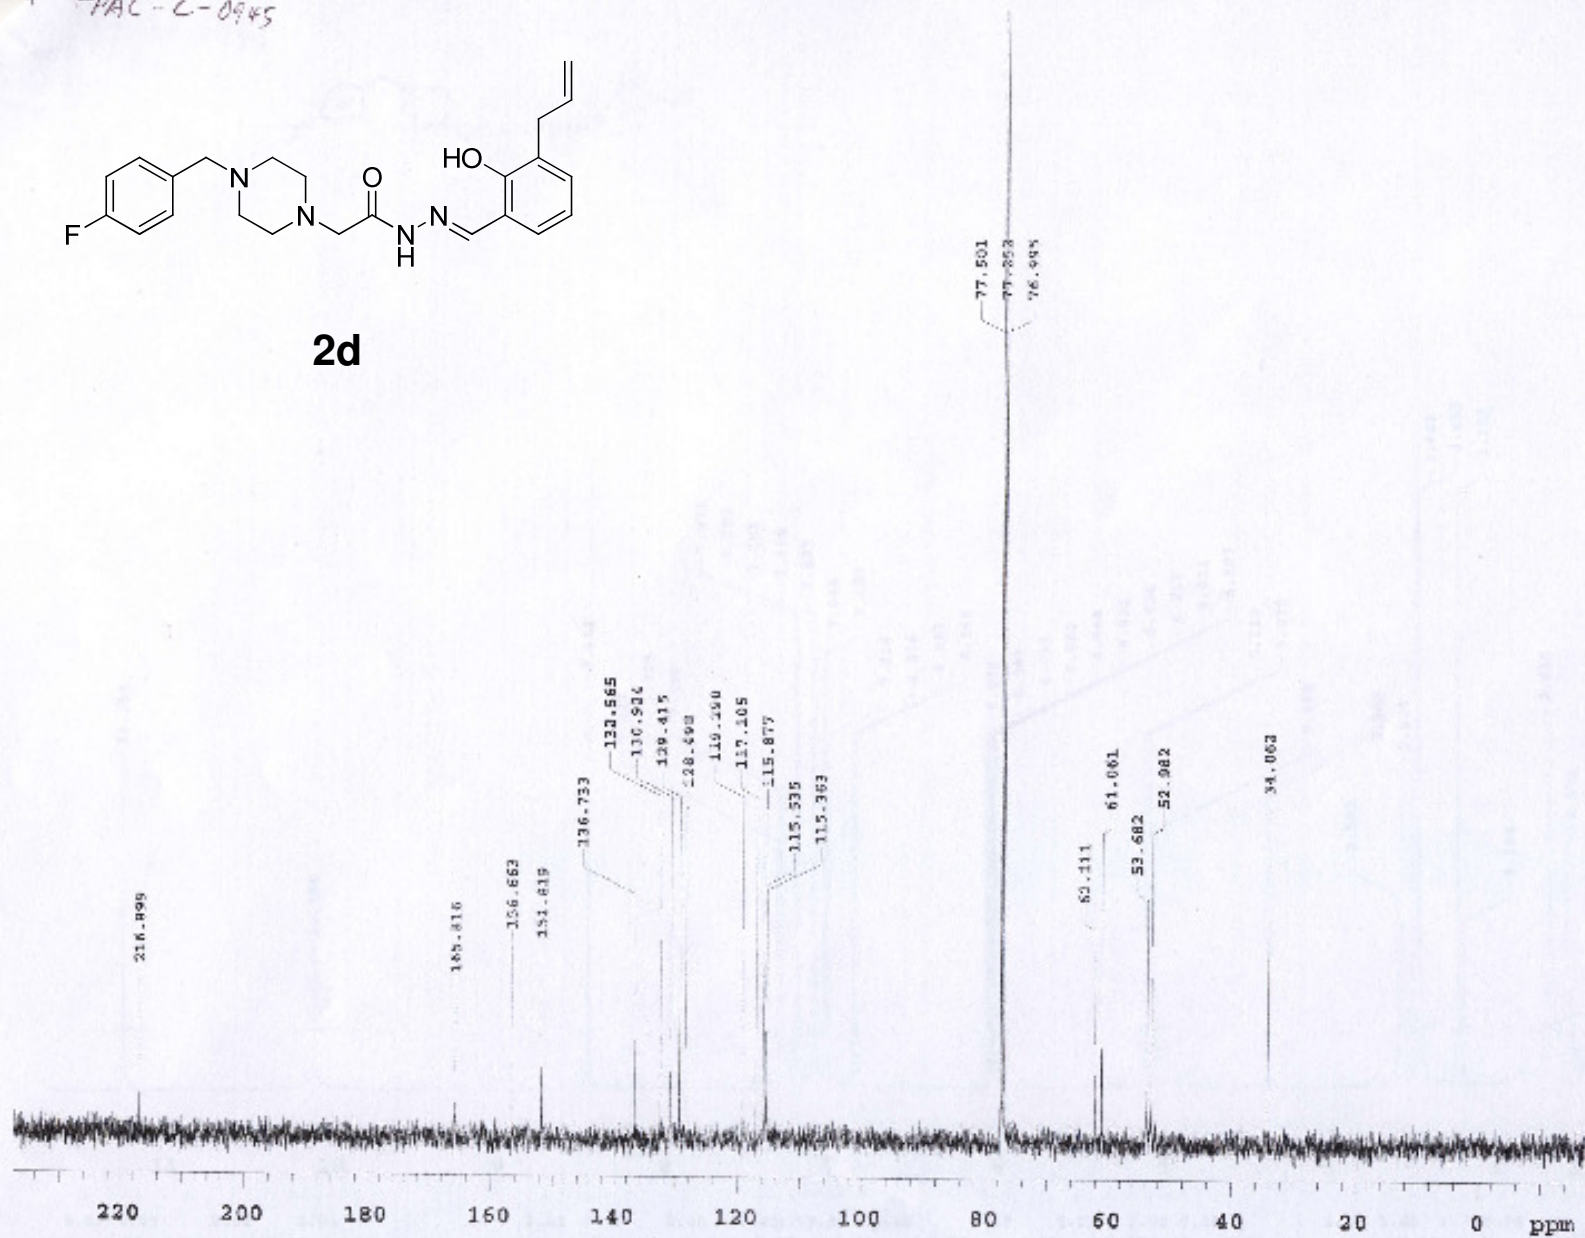

$^{19}\text{F}$  NMR,  $\text{CDCl}_3$

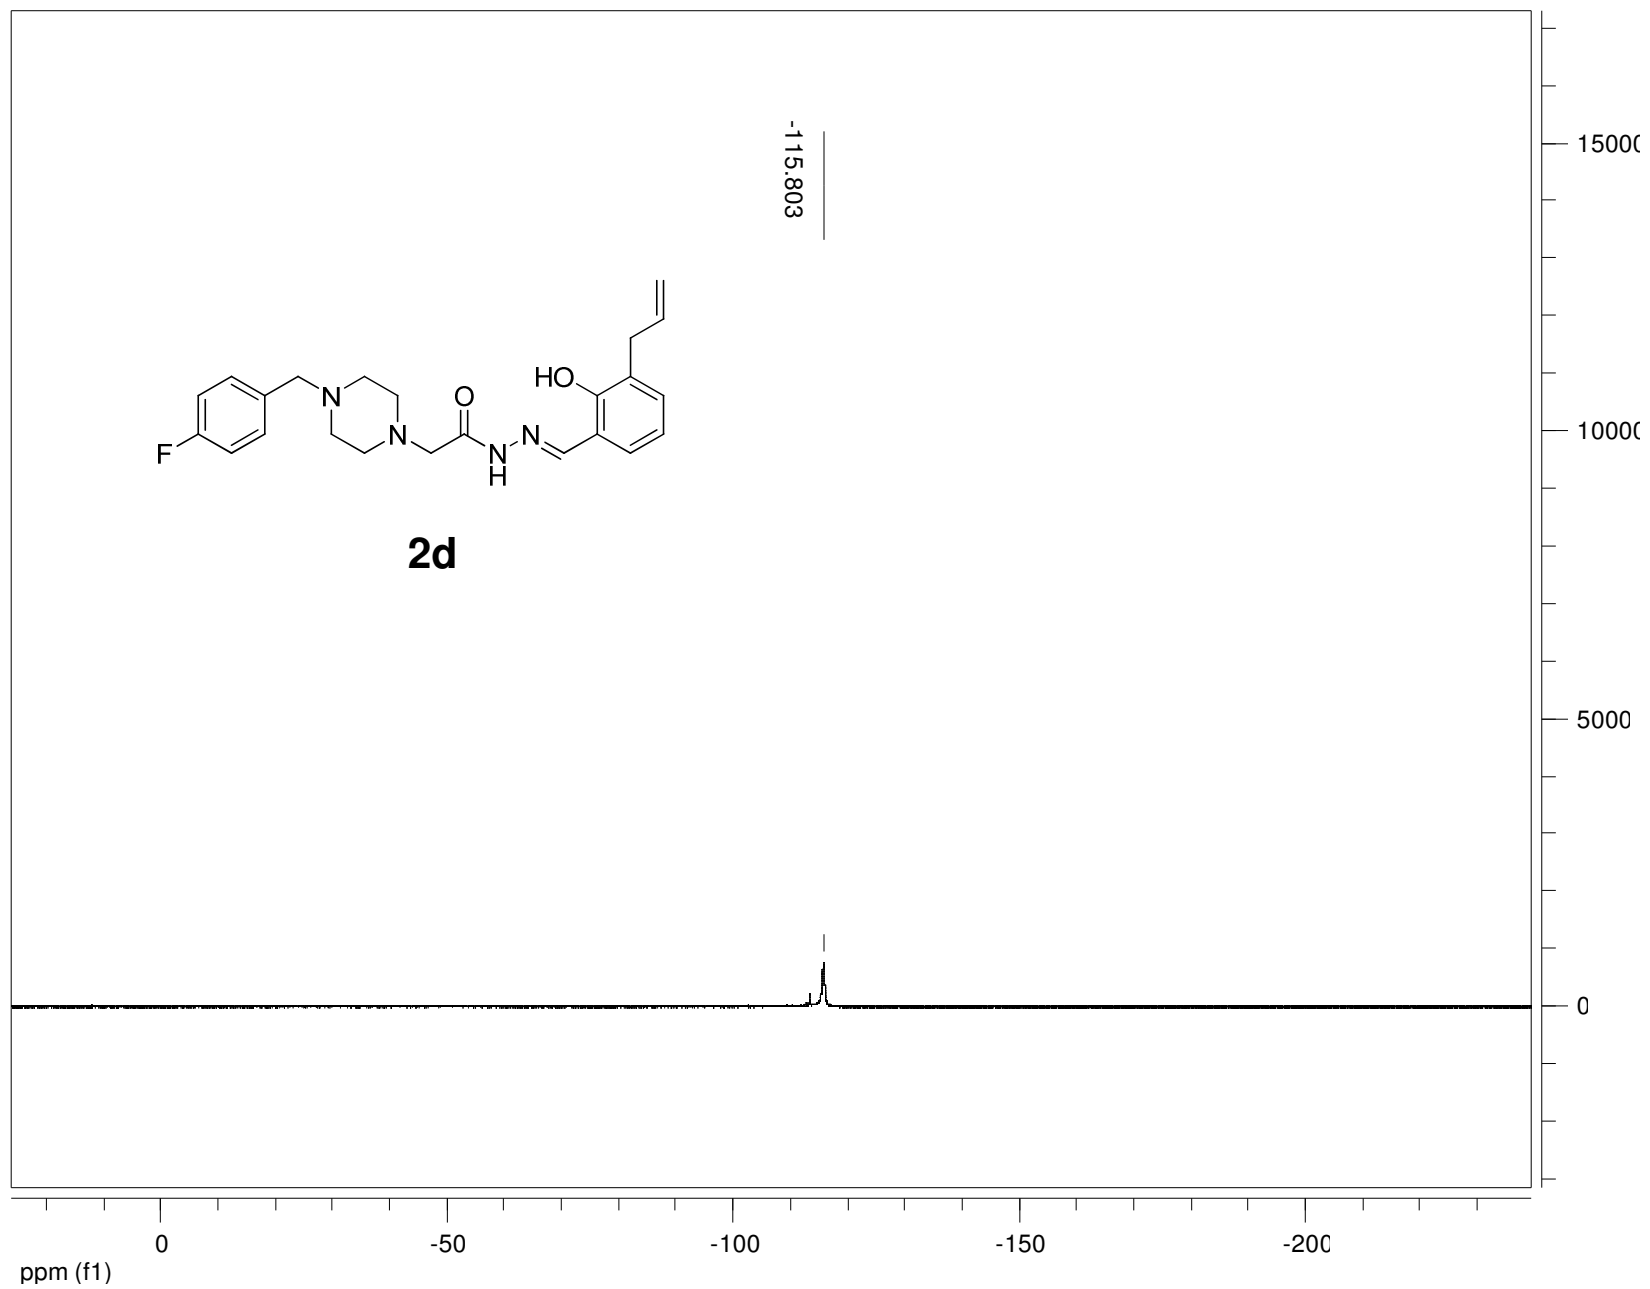



# HPLC

\* RUN # 436      JAN 8, 2008 13:19:46  
 START

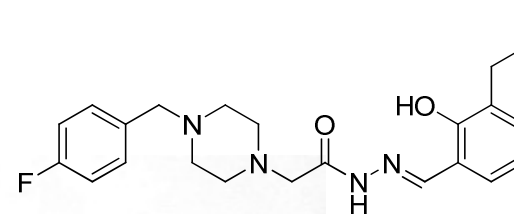

**2d**

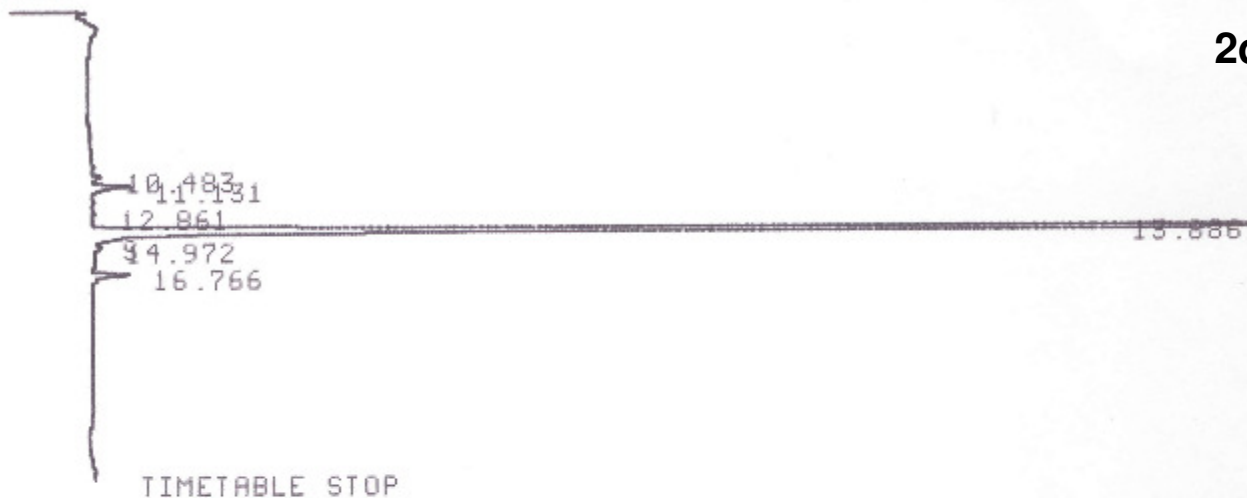

RUN# 436      JAN 8, 2008 13:19:46

| RT     | AREA     | TYPE | WIDTH | AREA%    |
|--------|----------|------|-------|----------|
| 10.483 | 238865   | BU   | .217  | .31261   |
| 11.131 | 1223276  | UU   | .289  | 1.60094  |
| 12.861 | 110514   | PP   | .236  | .14463   |
| 13.886 | 73565312 | SBB  | .213  | 96.27734 |
| 14.972 | 197511   | BB   | .303  | .25849   |
| 16.766 | 1074339  | BB   | .271  | 1.40602  |

TOTAL AREA=7.6410E+07  
 MUL FACTOR=1.0000E+00

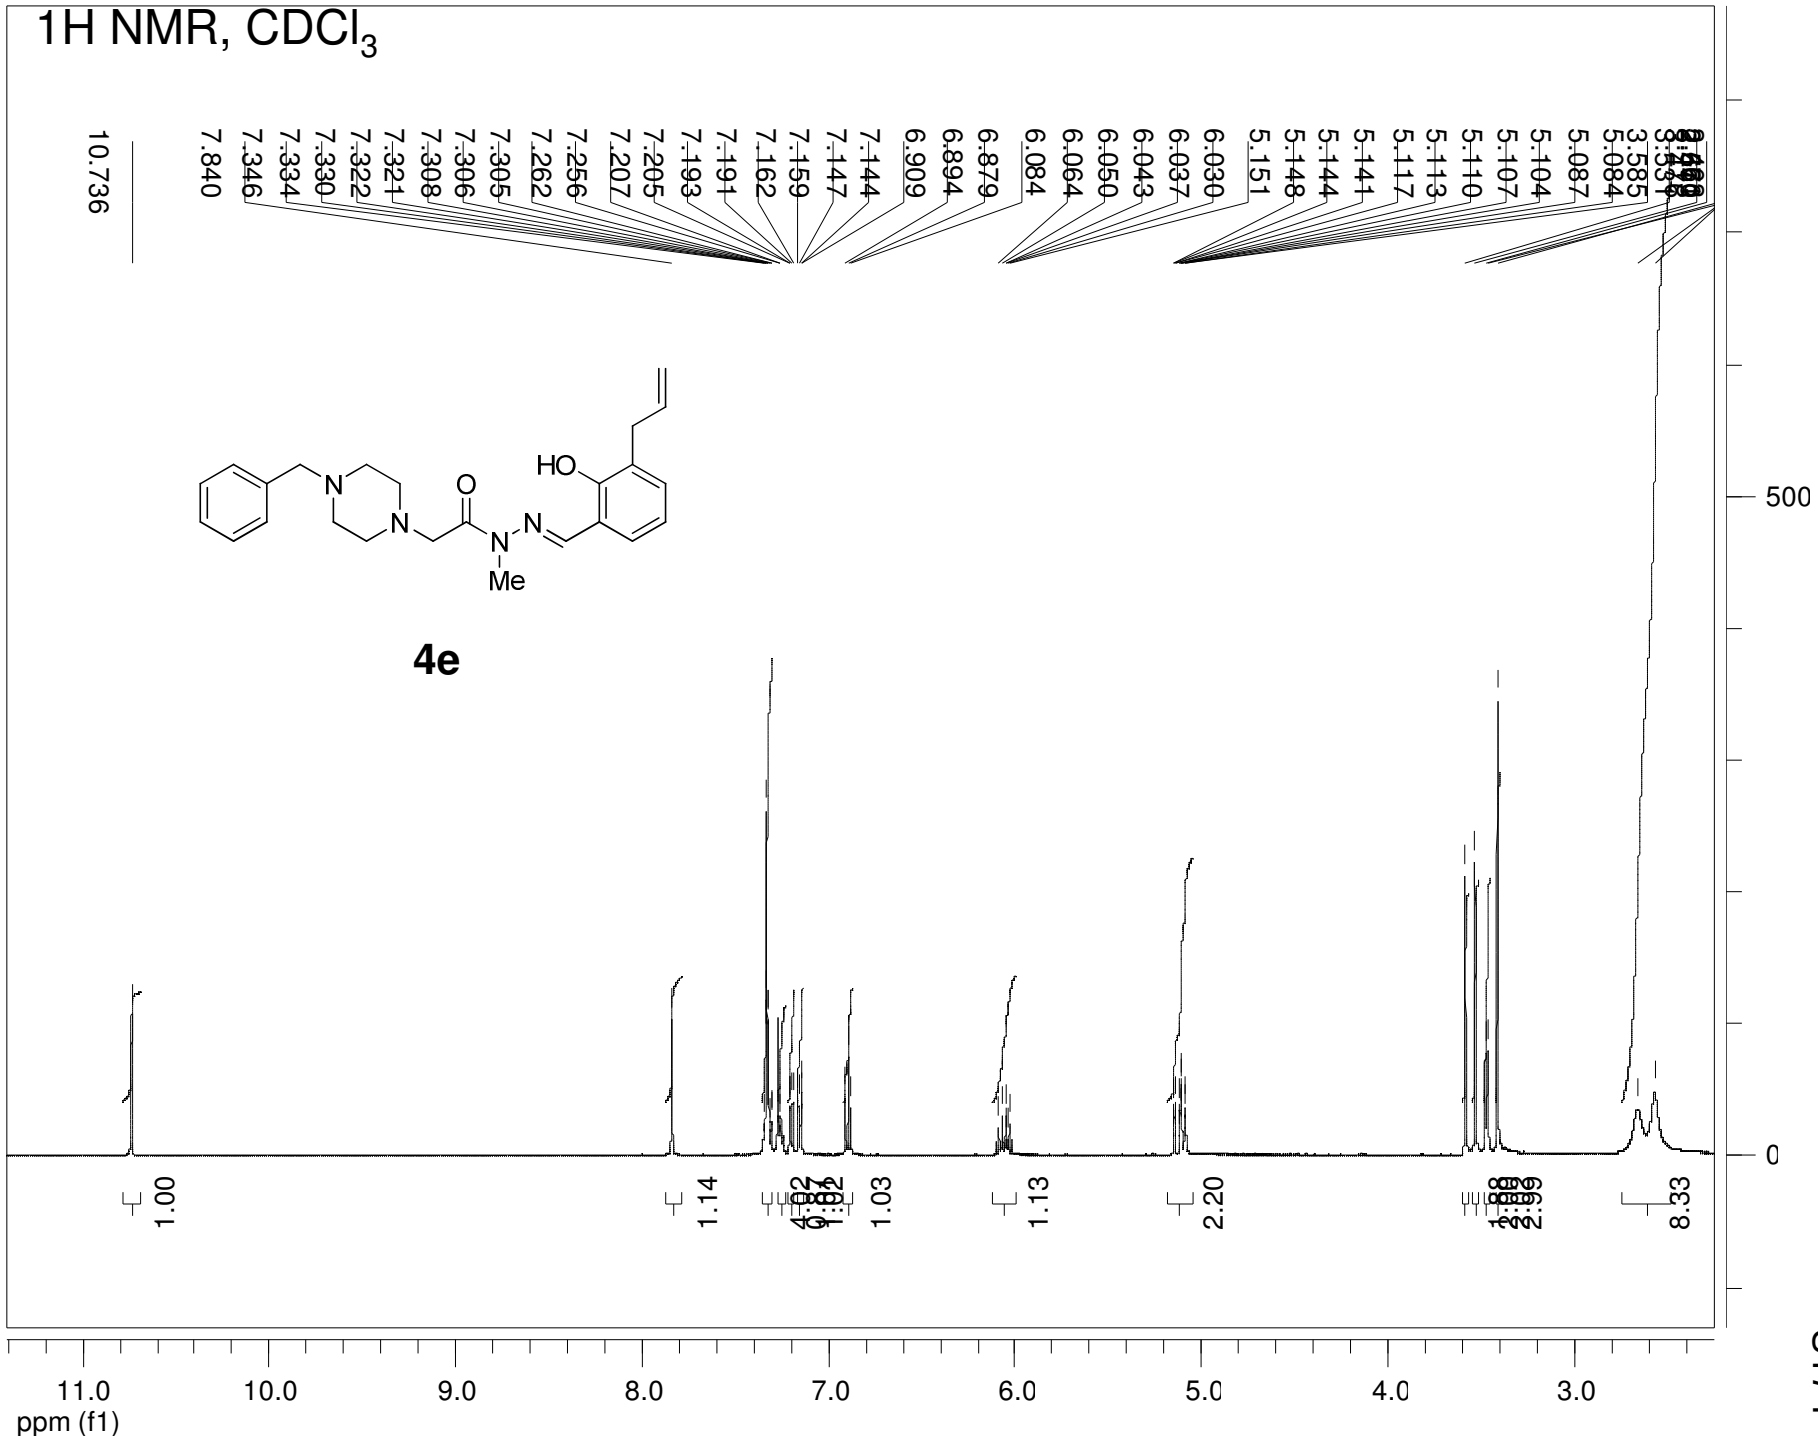

<sup>13</sup>C NMR, CDCl<sub>3</sub>

6000  
5000  
4000  
3000  
2000  
1000  
0  
-1000

- 169.759
- 155.263
- 142.908
- 138.384
- 136.759
- 131.929
- 129.597
- 129.409
- 128.413
- 128.336
- 127.217
- 119.461
- 117.832
- 115.940
- 63.207
- 61.031
- 53.625
- 52.870
- 34.174
- 27.689

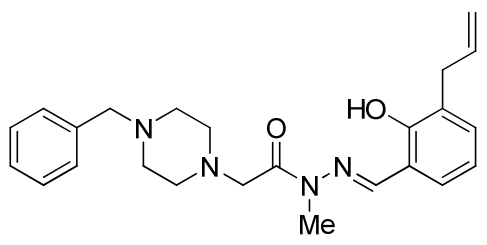

**4e**

ppm (f1)

150

100

50

S175

# HPLC

\* RUN # 444      JAN 8, 2008 17:48:50  
 START

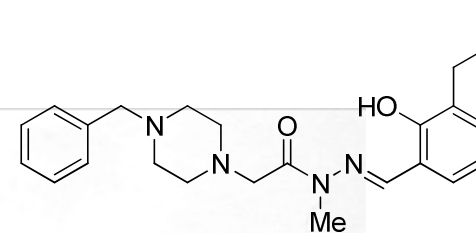

**4e**

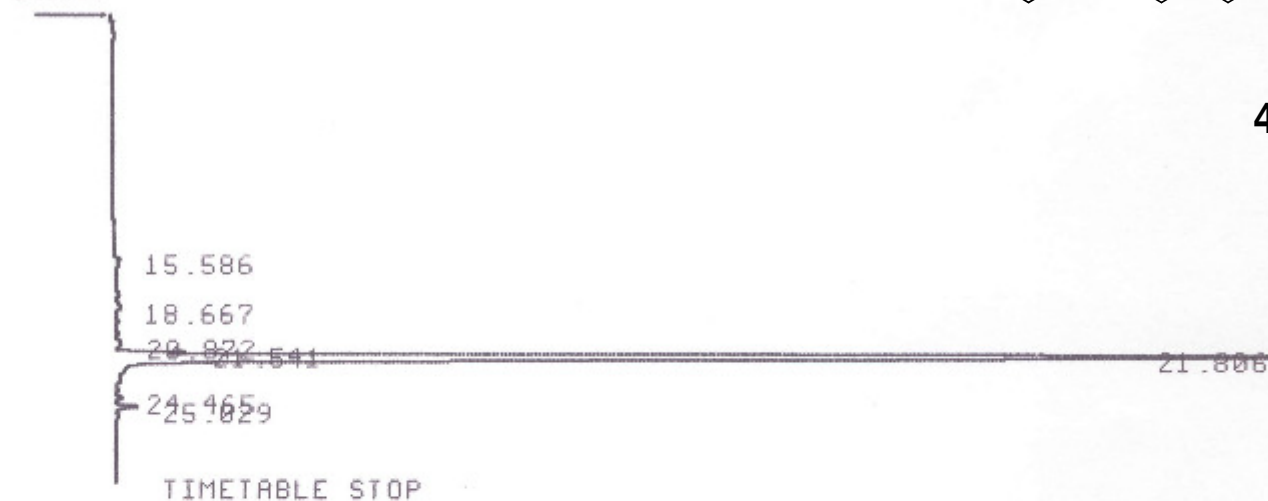

RUN# 444      JAN 8, 2008 17:48:50

| RT     | AREA     | TYPE | WIDTH | AREA%    |
|--------|----------|------|-------|----------|
| 15.586 | 56374    | PB   | .139  | .11563   |
| 18.667 | 171570   | PB   | .301  | .35191   |
| 20.872 | 218436   | BP   | .368  | .44804   |
| 21.541 | 778833   | PU   | .106  | 1.59749  |
| 21.806 | 46910688 | UB   | .373  | 96.22000 |
| 24.465 | 156491   | BP   | .222  | .32098   |
| 25.029 | 461187   | PB   | .201  | .94596   |

TOTAL AREA=4.8754E+07  
 MUL FACTOR=1.0000E+00

1H NMR, CDCl<sub>3</sub>

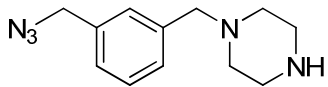

51

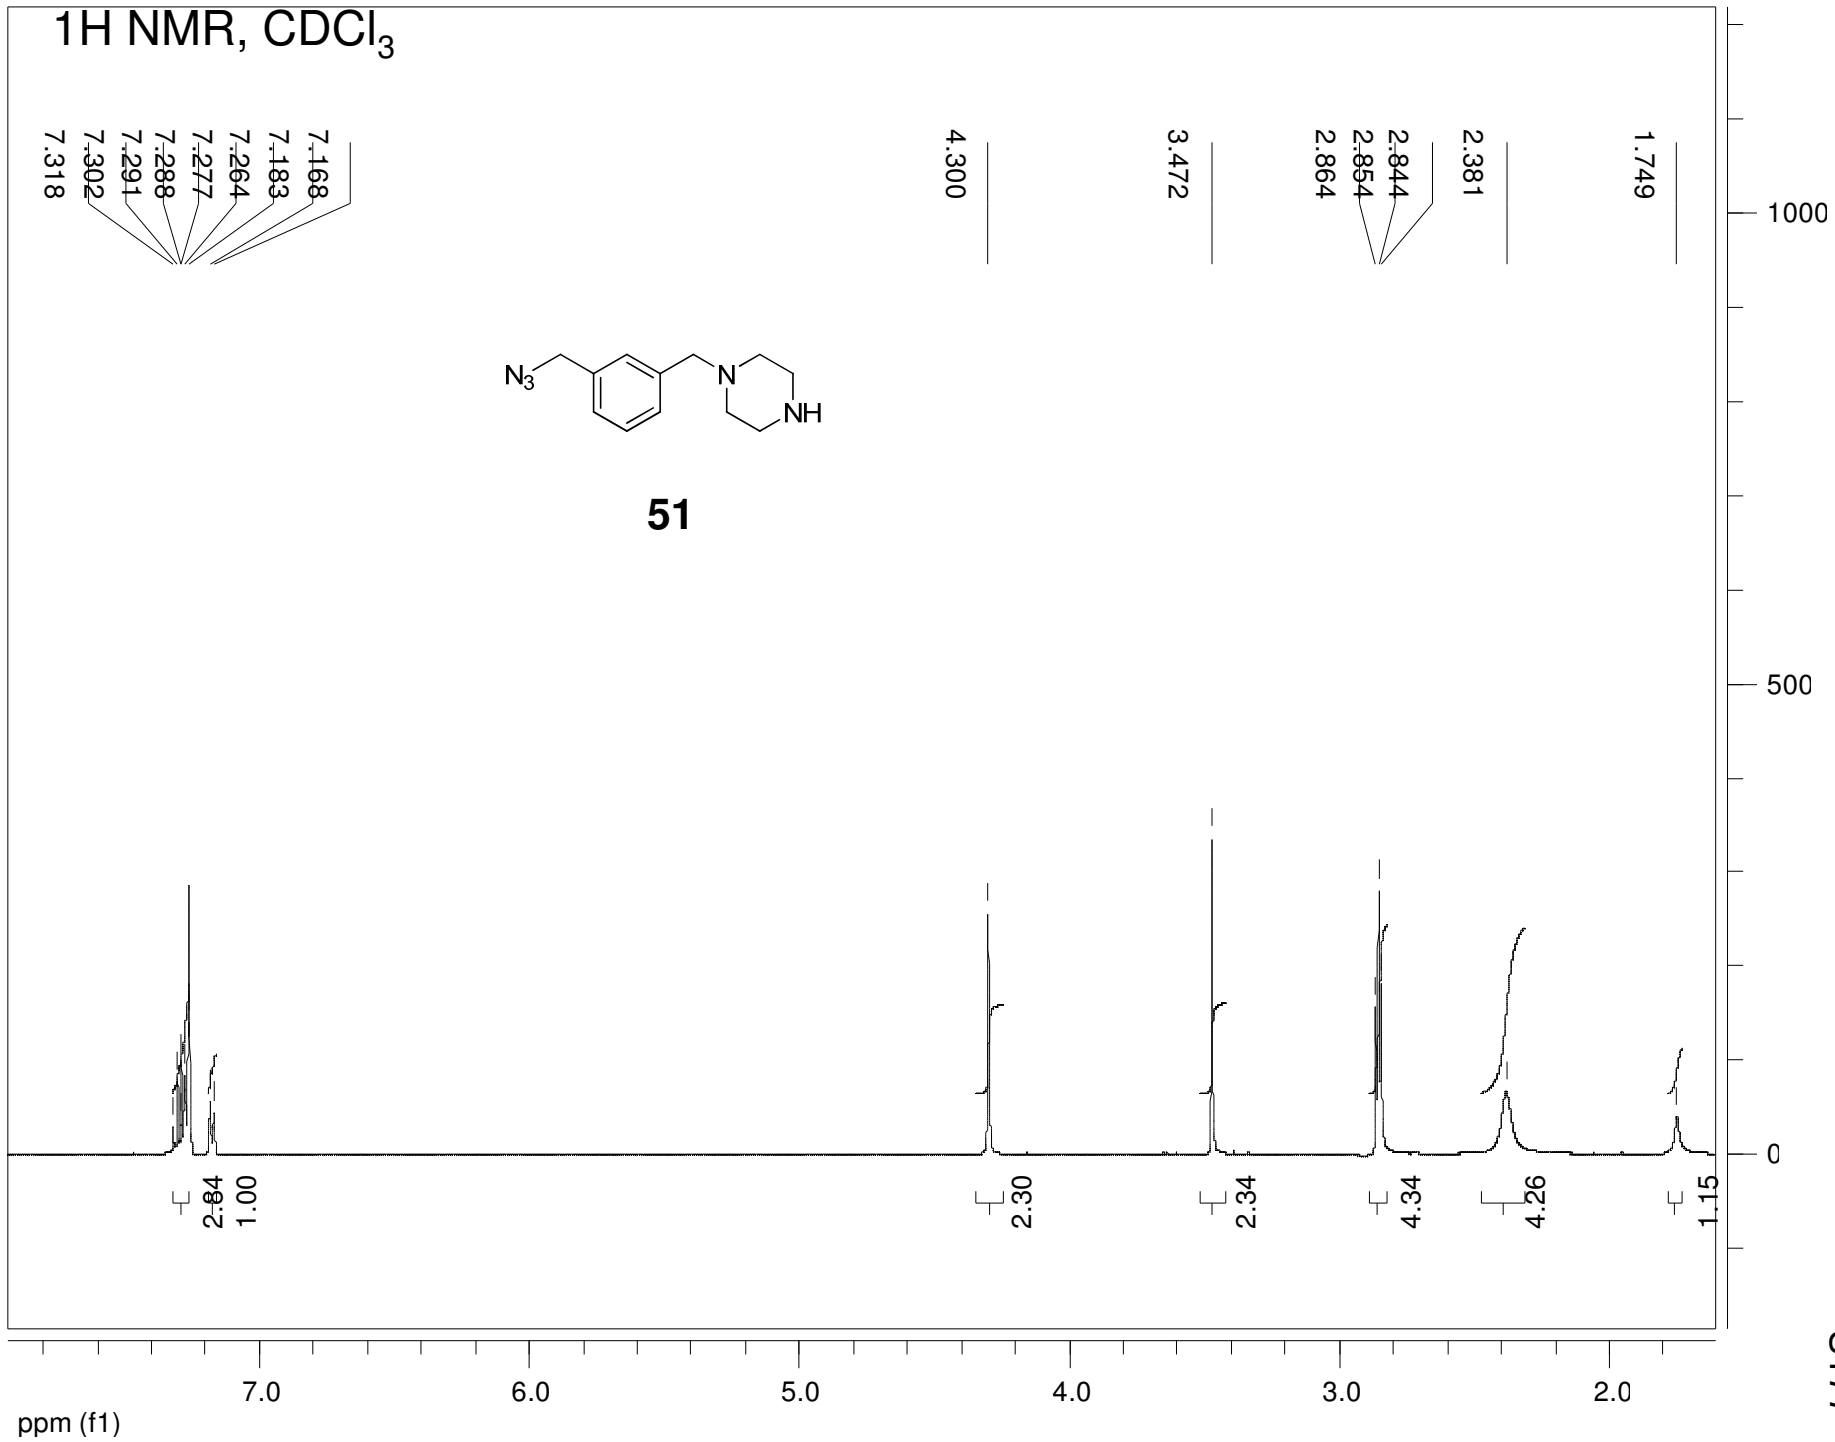

<sup>13</sup>C NMR, CDCl<sub>3</sub>

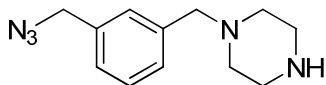

**51**

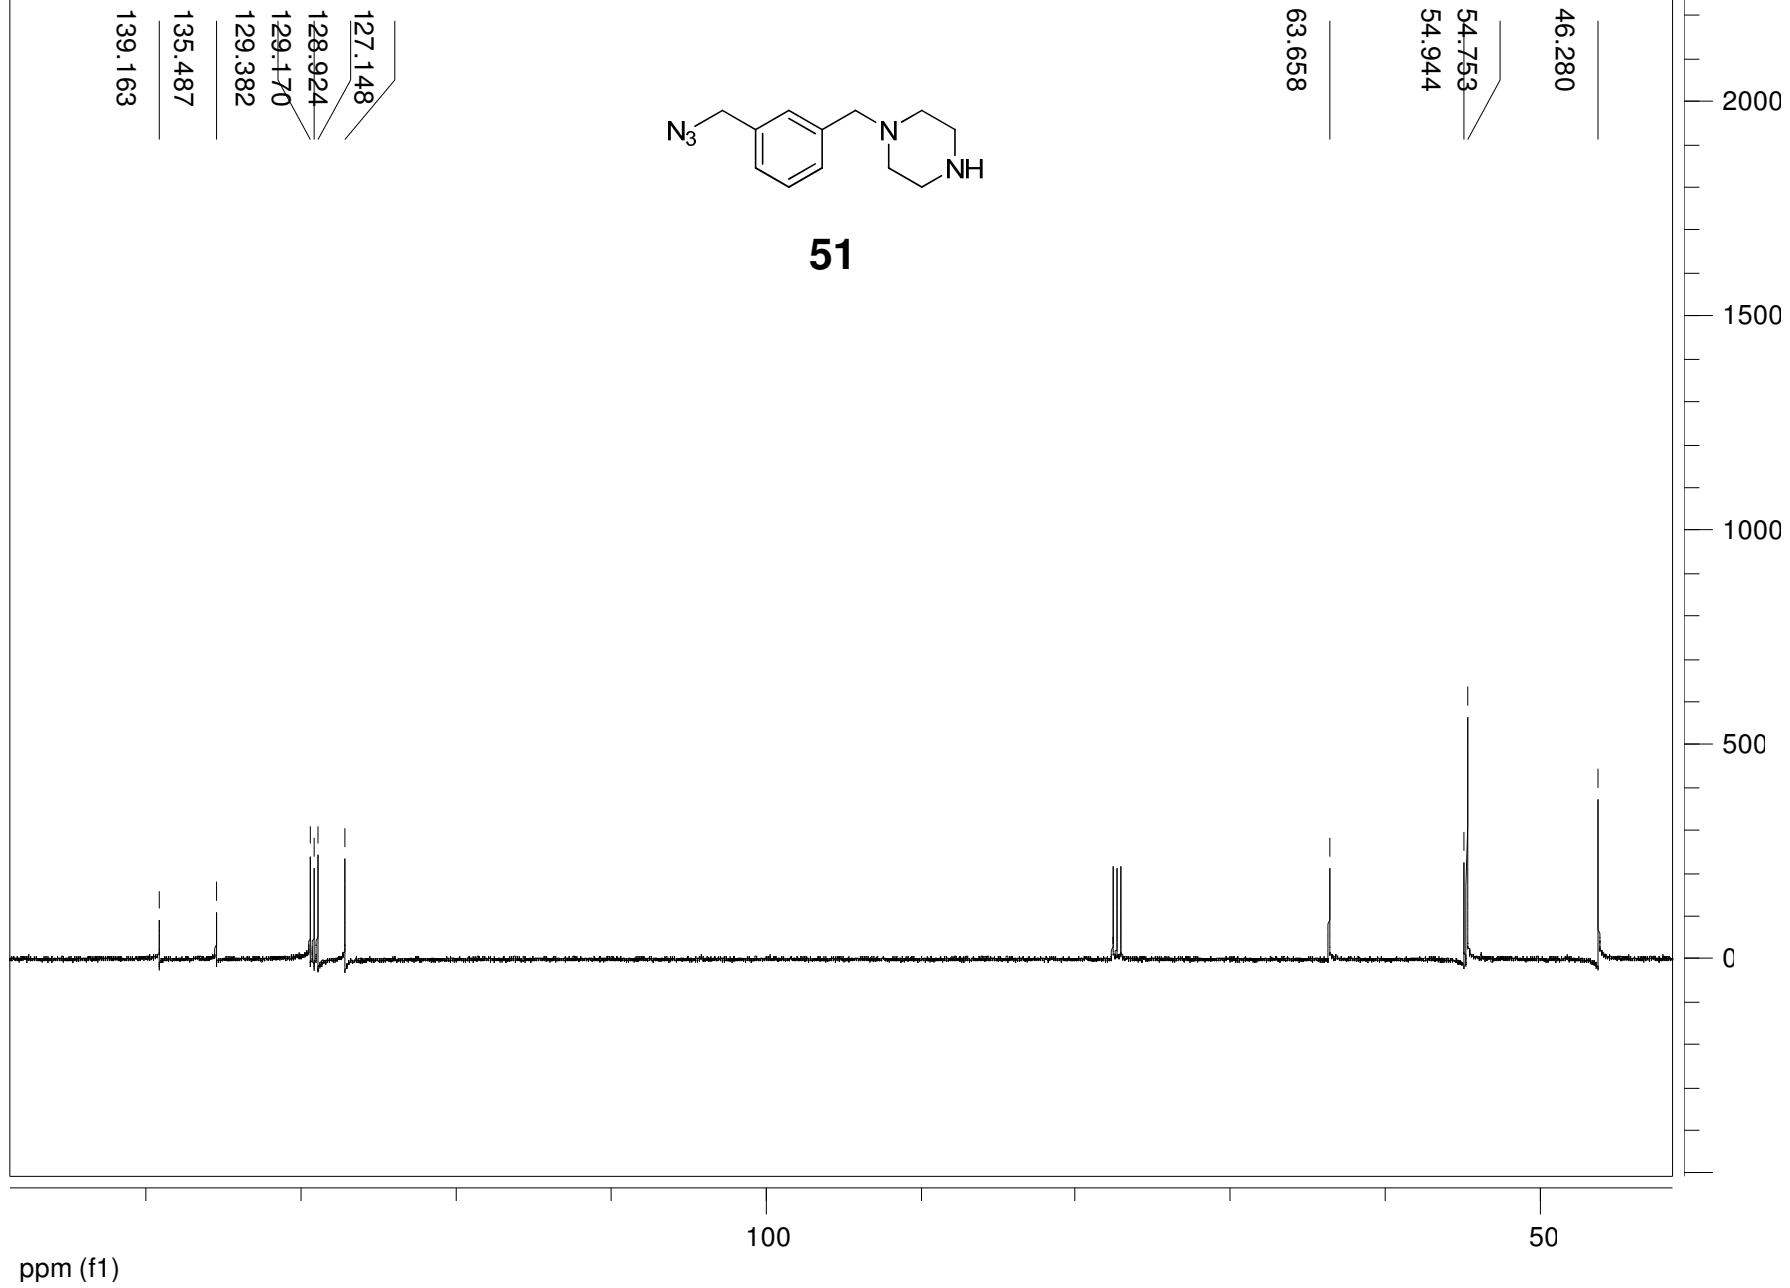

$^1\text{H NMR}$ ,  $\text{CDCl}_3$

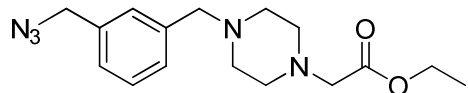

**52**

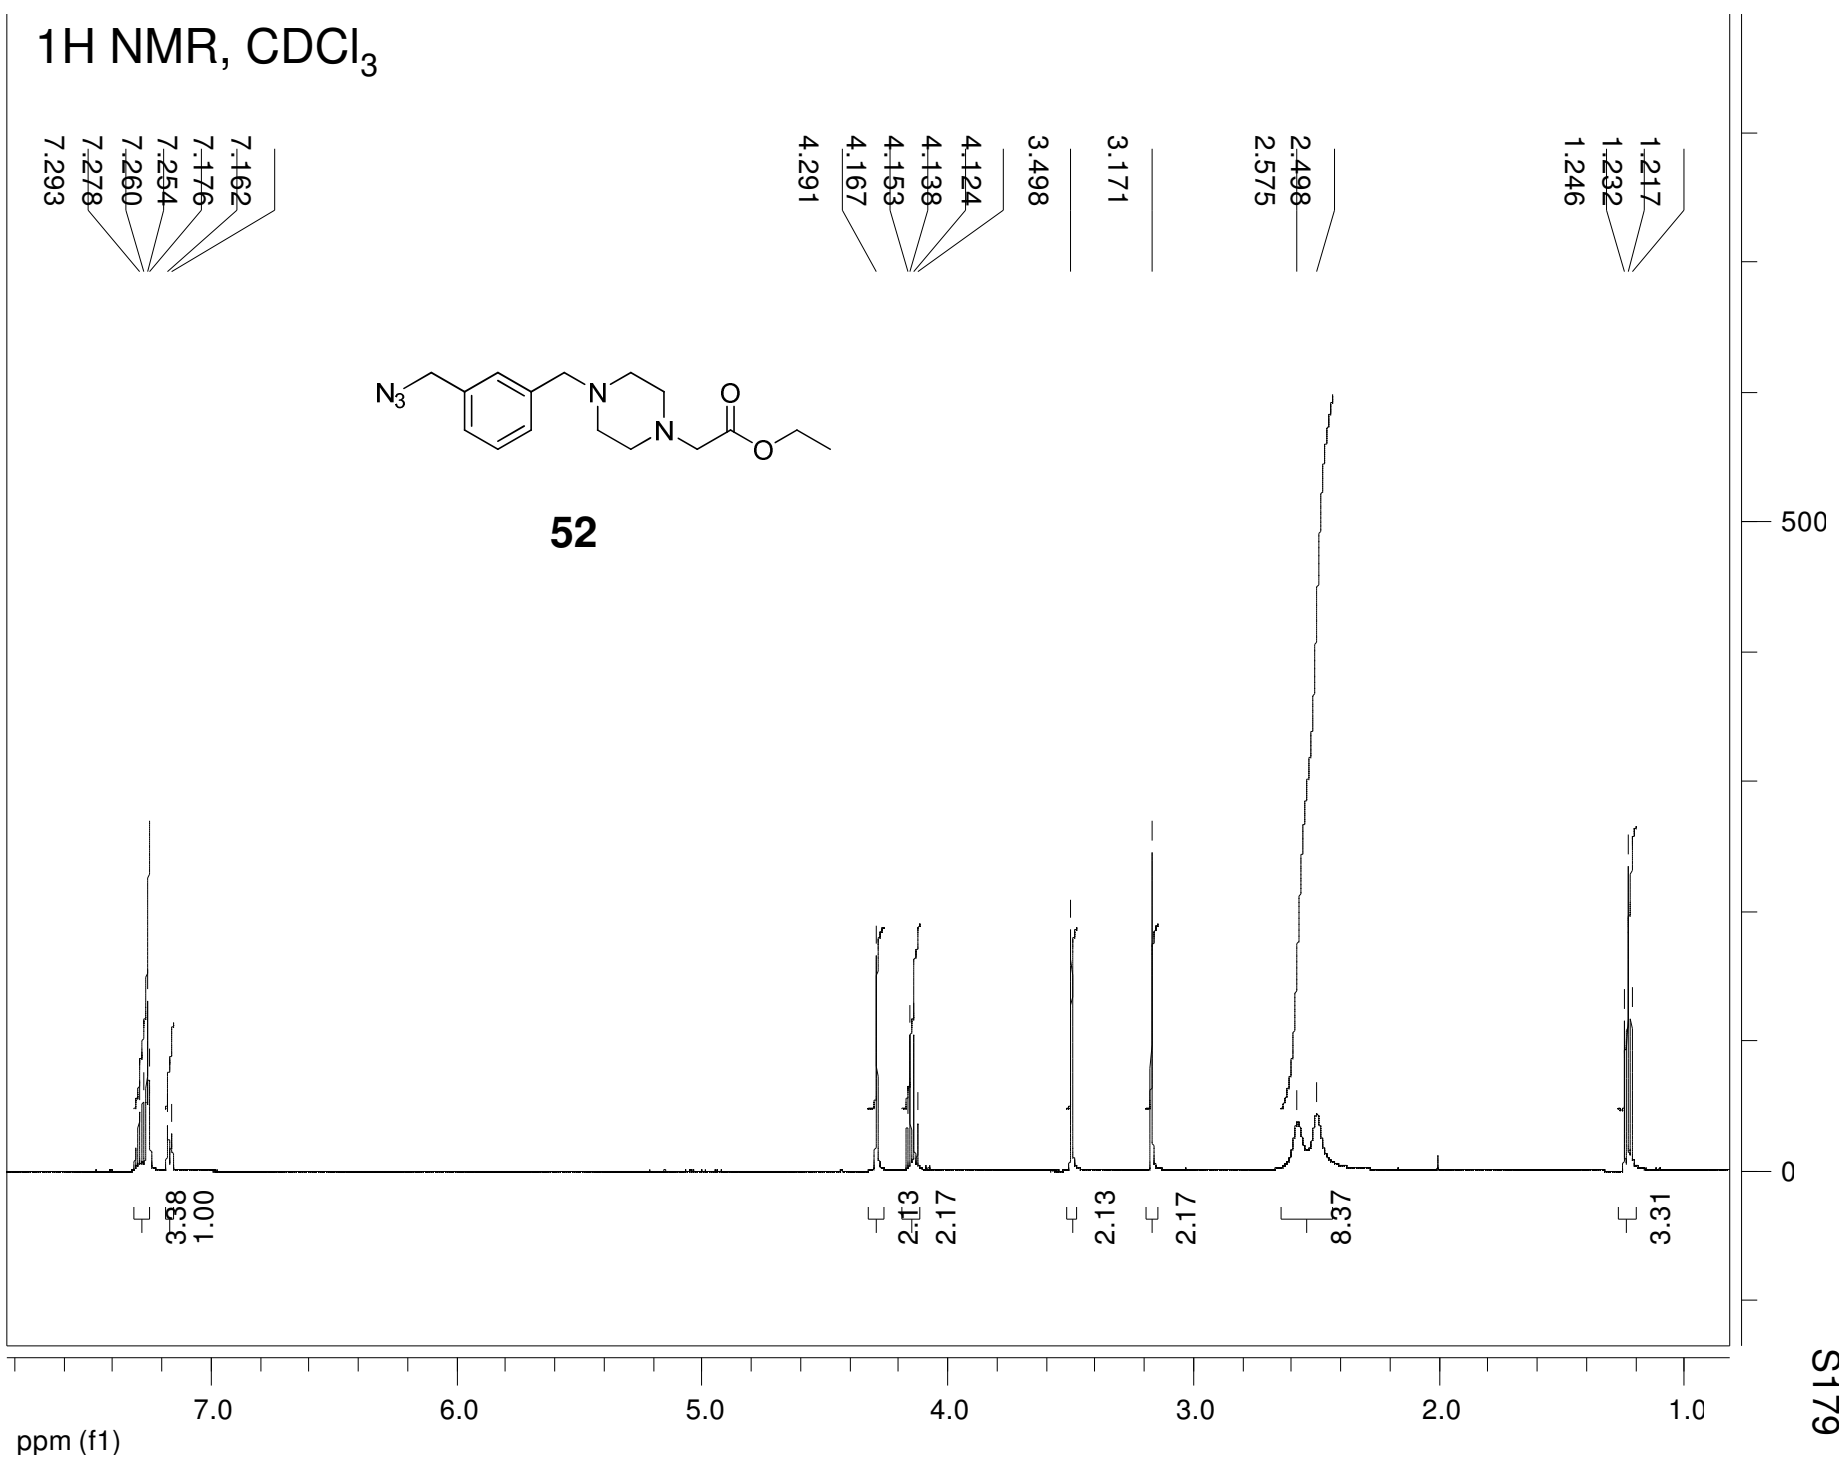

<sup>13</sup>C NMR, CDCl<sub>3</sub>

170.482

139.107

135.519

129.336

129.113

128.940

127.180

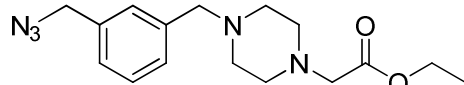

52

62.909

60.801

59.716

54.919

53.237

53.018

14.472

ppm (f1)

150

100

50

S180



1H NMR, CDCl<sub>3</sub>

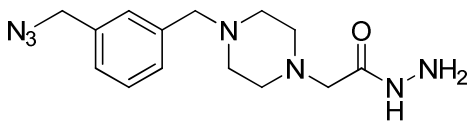

53

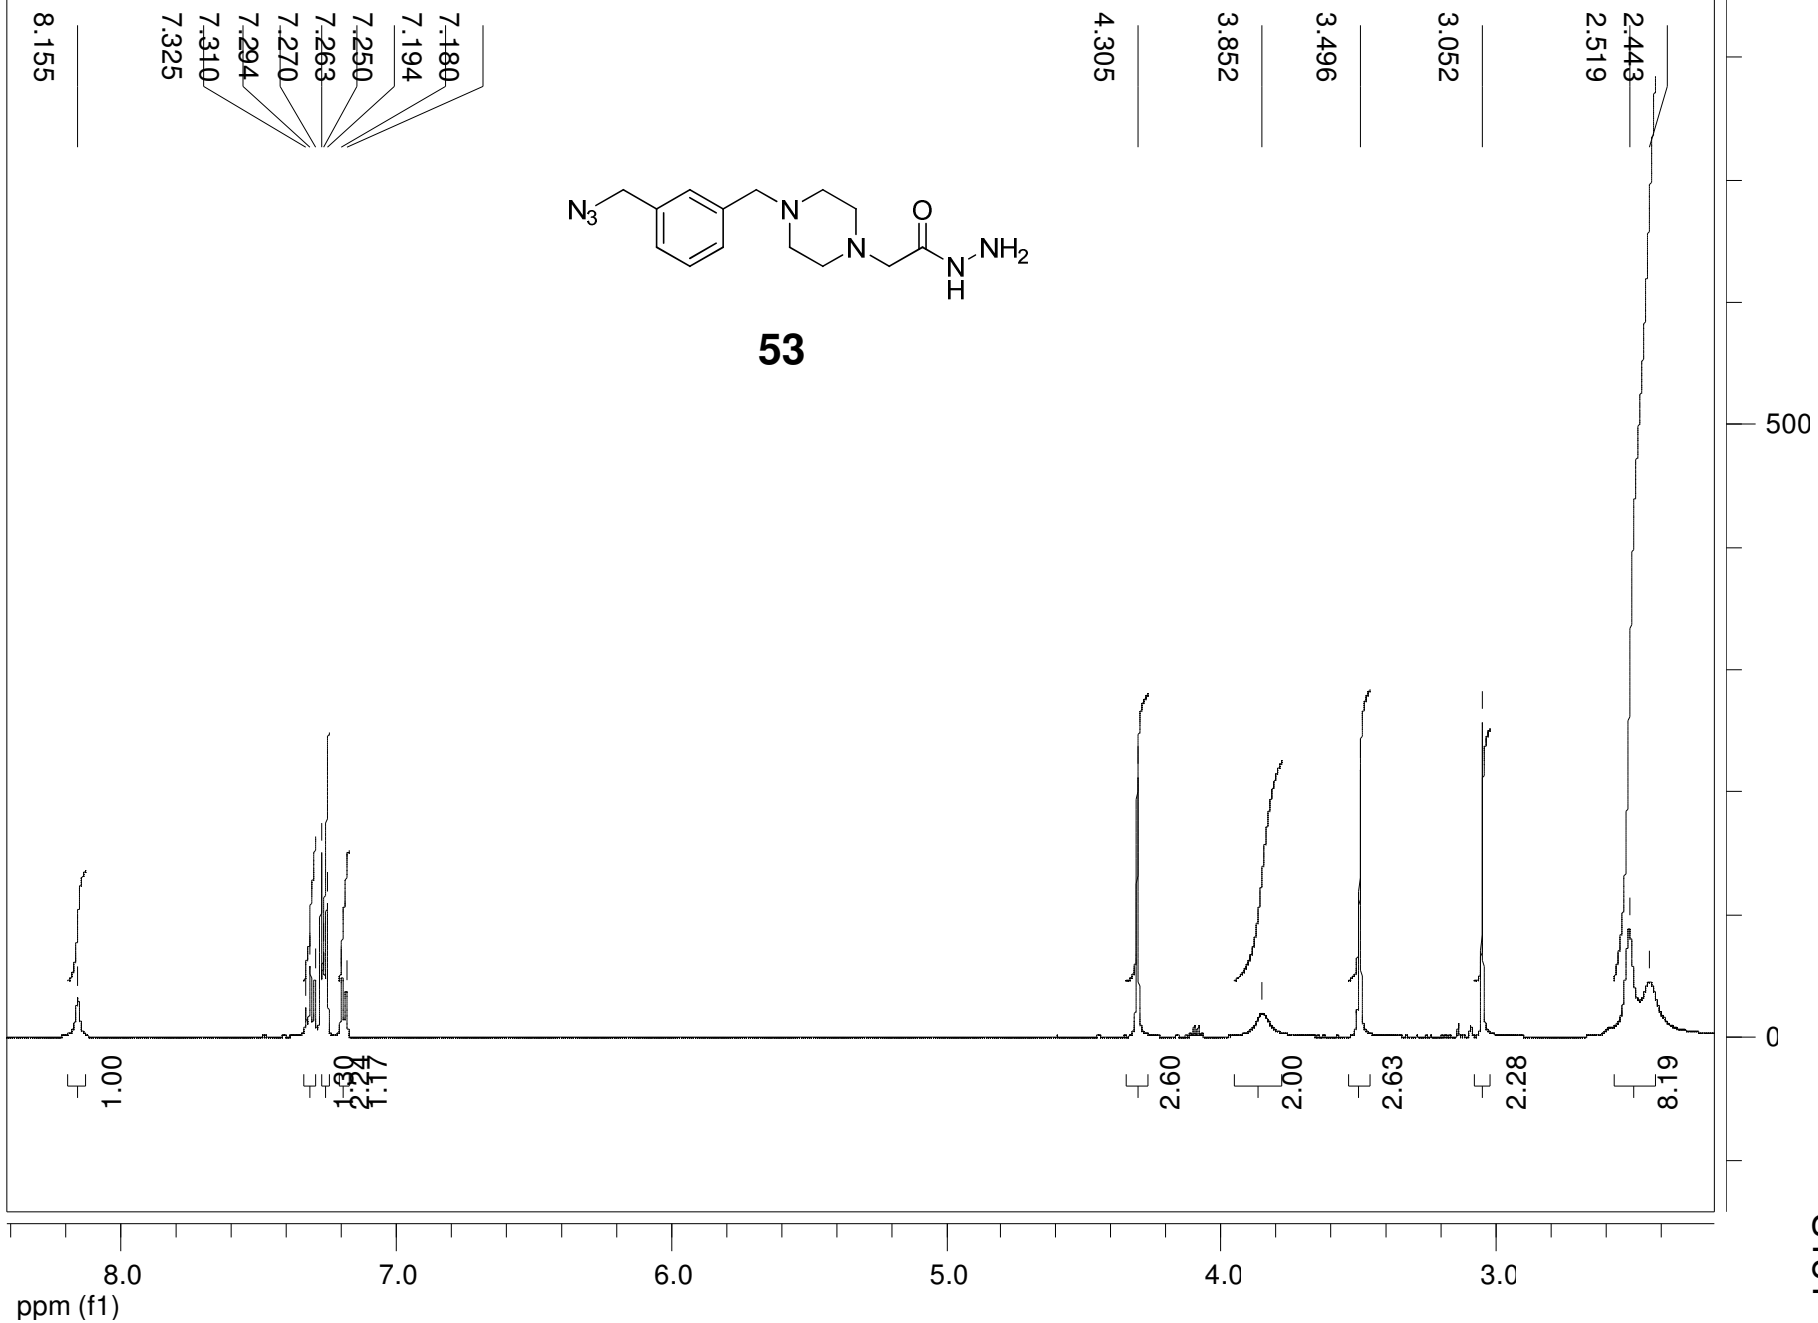

<sup>13</sup>C NMR, CDCl<sub>3</sub>

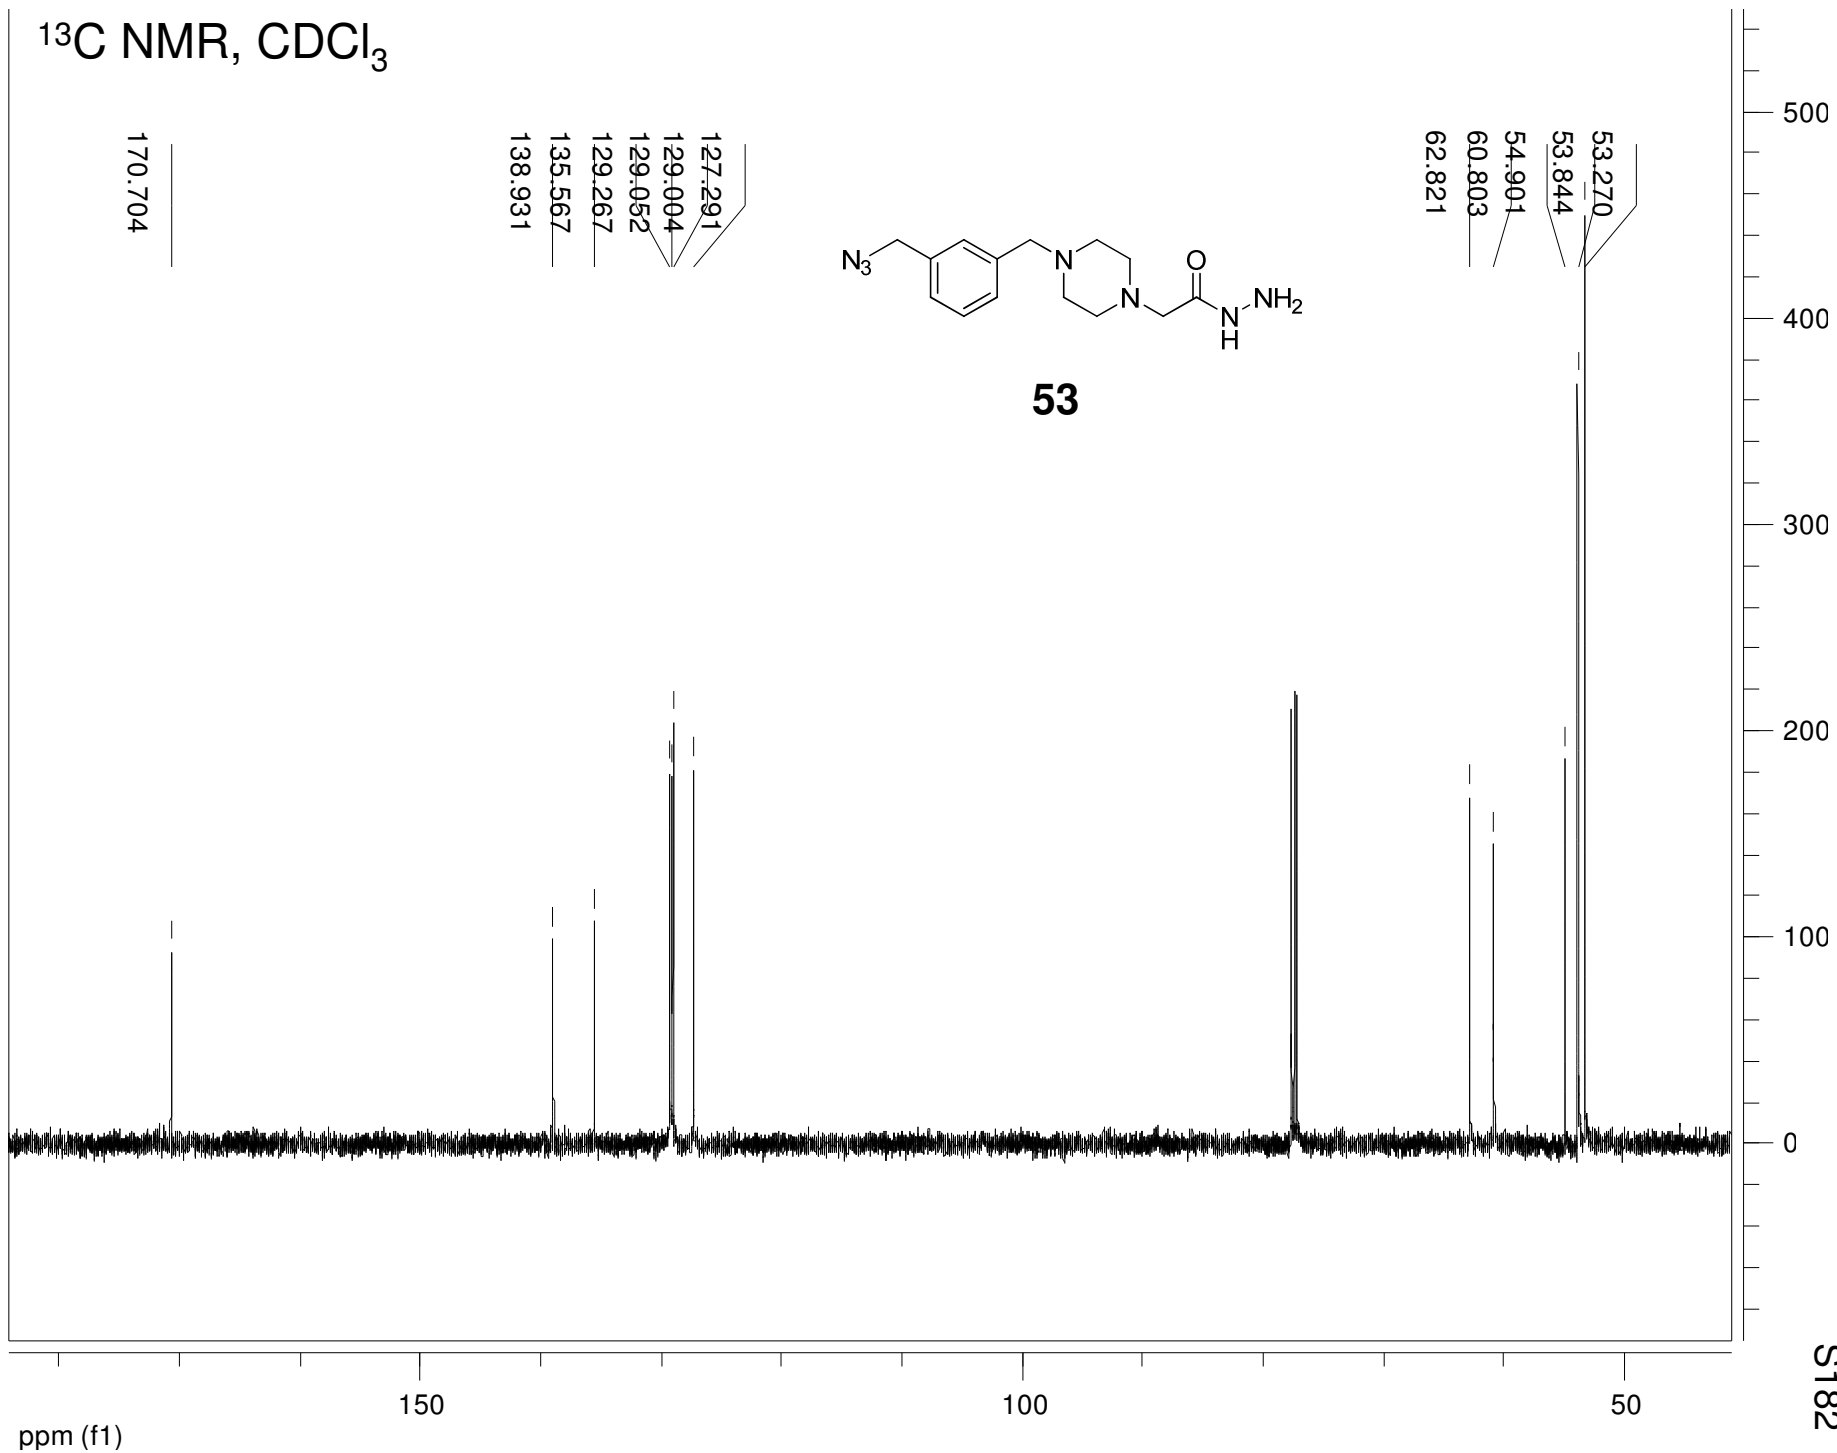



<sup>13</sup>C NMR, CDCl<sub>3</sub>

166.055

156.621

151.470

138.833

136.750

135.621

132.515

129.397

129.313

129.092

128.444

127.403

119.660

119.287

117.103

115.903

62.836

61.190

54.939

53.908

53.242

34.092

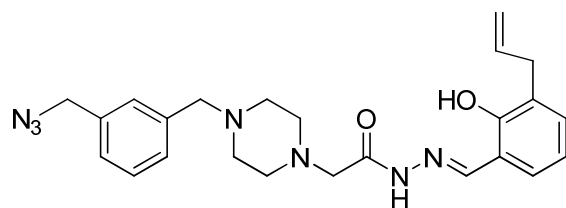

**34**

ppm (t1)

150

100

50

S184



# HPLC

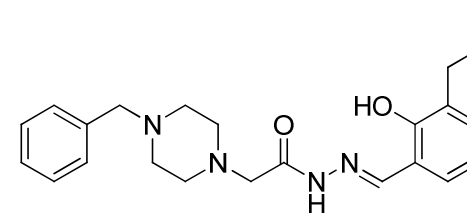

**PAC-1 (1)**

\* RUN # 412      JAN 6, 2008 18:51:21  
START

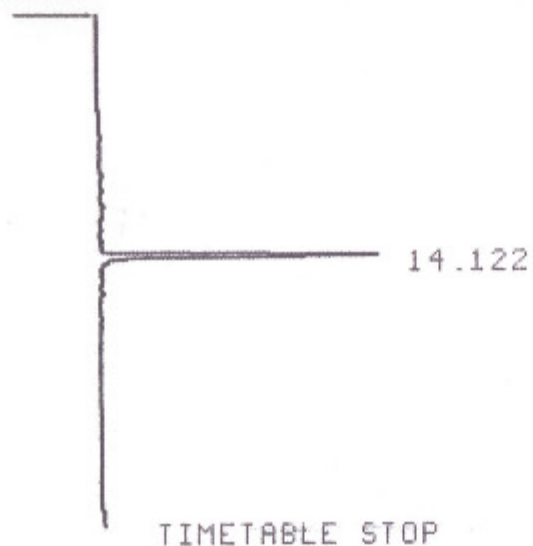

RUN# 412      JAN 6, 2008 18:51:21

AREA%

| RT     | AREA    | TYPE | WIDTH | AREA%     |
|--------|---------|------|-------|-----------|
| 14.122 | 5036704 | BB   | .188  | 100.00000 |

TOTAL AREA=5036704

MUL FACTOR=1.0000E+00
